# Supplementary material for: Differential effect of canagliflozin, a sodium–glucose cotransporter 2 (SGLT2) inhibitor, on slow and fast skeletal muscles from nondiabetic mice
Source: Biochem J. 2022 Feb 11;479(3):425–44. doi: 10.1042/BCJ20210700 (PMC8883489; doi:10.1042/BCJ20210700)
Supplement: Supplementary Tables S4-S9 [file BCJ-479-425-s2.pdf]

## Sheet: Supplementary Table S4
	Supplementary Table S4. Metabolic profile data of 190 hydrophilic metabolites during the 2-week ad libitum feeding
		Hydrophilic metabolite	Abbreviation	Molecular formula	Exact mass	KEGG ID	HMDB ID	Method	Adduct ion	RT (min)	Peak area												Relative peak area (Analyte/IS/sample amount, mg)									SOL (CANA/Vehicle)		EDL (CANA/Vehicle)
											Vehicle-treated mice SOL		CANA-treated mice SOL		Vehicle-treated mice EDL		CANA-treated mice EDL			IS			Vehicle-treated mice SOL		CANA-treated mice SOL		Vehicle-treated mice EDL		CANA-treated mice EDL			Fold change		Fold change
											1	2	1	2	1	2	1	2		Compound	Method	Adduct ion	1	2	1	2	1	2	1	2
											Sample amount (mg)
											8.04	8.63	5.8	8.74	9.74	12.41	12.9	12.62
	1	2-Ketoglutaric acid	2KG	C5H6O5	146.022	C00026	HMDB00208	IC/MS	[M ‒ H]‒	10.06 ±0.02	3.4628e+08	2.85371e+08	3.2343e+08	3.2163e+08	2.11124e+08	2.0892e+08	2.7321e+08	3.06716e+08		PIPES (IS)	IC/MS	[M ‒ H]‒	1.25844	1.10559	1.58418	1.4847	0.592137	0.625628	0.665515	0.862788		1.29816		1.25501
	2	6-Phosphogluconic acid	6PG	C6H13O10P	276.025	C00345	HMDB01316	IC/MS	[M ‒ H]‒	12.08 ±0.02	6.16346e+06	5.03925e+06	4.63779e+06	1.42711e+07	1.55262e+07	1.5318e+07	1.88139e+07	2.05461e+07		PIPES (IS)	IC/MS	[M ‒ H]‒	0.022399	0.0195231	0.0227162	0.0658775	0.0435463	0.0458711	0.045829	0.057796		2.11329		1.15889
	3	Adenosine 5'-diphosphate	ADP	C10H15N5O10P2	427.029	C00008	HMDB01341	IC/MS	[M ‒ H]‒	17.18 ±0.02	2.92309e+08	7.56037e+08	3.4677e+08	2.33495e+08	3.73624e+08	2.6165e+08	4.28608e+08	5.62561e+08		PIPES (IS)	IC/MS	[M ‒ H]‒	1.0623	2.92905	1.6985	1.07785	1.0479	0.783533	1.04405	1.58247		0.695593		1.43413
	4	Adenosine 5'-diphosphate ribose	ADP-Rib	C15H23N5O14P2	559.072	C00301	HMDB01178	IC/MS	[M ‒ H]‒	15.6 ±0.02	1.44984e+08	8.91769e+07	8.66065e+07	636234	1.01869e+08	9.00576e+07	1.01665e+08	1.30042e+08		PIPES (IS)	IC/MS	[M ‒ H]‒	0.526896	0.34549	0.424204	0.00293696	0.285711	0.269685	0.247648	0.365805		0.489624		1.10453
	5	Adenosine 5'-monophosphate	AMP	C10H14N5O7P	347.063	C00020	HMDB00045	IC/MS	[M ‒ H]‒	11.12 ±0.05	5.12261e+08	6.81569e+08	6.91335e+08	1.49229e+08	2.44971e+08	1.07805e+08	1.6068e+08	1.82792e+08		PIPES (IS)	IC/MS	[M ‒ H]‒	1.86164	2.64054	3.3862	0.688866	0.68707	0.322832	0.391402	0.514191		0.905132		0.896714
	6	Adenosine 5'-triphosphate	ATP	C10H16N5O13P3	506.996	C00002	HMDB00538	IC/MS	[M ‒ H]‒	21.71 ±0.03	1.4622e+08	7.10919e+08	1.98943e+08	8.15654e+07	2.21396e+08	4.5311e+08	6.31878e+08	8.19891e+08		PIPES (IS)	IC/MS	[M ‒ H]‒	0.531386	2.75425	0.974433	0.376519	0.620947	1.35688	1.5392	2.30634		0.41117		1.94433
	7	Adenosine 3',5'-cyclic monophosphate	cAMP	C10H12N5O6P	329.053	C00575	HMDB00058	IC/MS	[M ‒ H]‒	11.8 ±0.02	294630	888335	513247	168231	551171	582801	657541	541876		PIPES (IS)	IC/MS	[M ‒ H]‒	0.00107073	0.0034416	0.00251391	0.000776583	0.00154587	0.00174525	0.00160171	0.00152429		0.729224		0.949831
	8	Cytidine 5'-diphosphate	CDP	C9H15N3O11P2	403.018	C00112	HMDB01546	IC/MS	[M ‒ H]‒	13.91 ±0.01	1.91217e+06	7.61653e+06	3.4958e+06	274340	1.4789e+06	1.72366e+06	2.14076e+06	3.22449e+06		PIPES (IS)	IC/MS	[M ‒ H]‒	0.00694915	0.029508	0.0171226	0.0012664	0.00414788	0.00516164	0.00521471	0.00907044		0.504401		1.53447
	9	cis-Aconitic acid	cis-Aco	C6H6O6	174.016	C00417	HMDB00072	IC/MS	[M ‒ H]‒	15.25 ±0.05	7.56268e+07	7.66089e+07	6.16889e+07	2.17096e+07	4.05444e+07	3.46263e+07	3.6491e+07	5.22109e+07		PIPES (IS)	IC/MS	[M ‒ H]‒	0.27484	0.296799	0.302156	0.100215	0.113715	0.103691	0.0888888	0.146868		0.703891		1.08441
	10	Citric acid	Cit	C6H8O7	192.027	C00158	HMDB00094	IC/MS	[M ‒ H]‒	14.08 ±0.01	1.14507e+09	1.28609e+09	1.0876e+09	1.02554e+08	6.40901e+08	5.20367e+08	5.1706e+08	7.5579e+08		PIPES (IS)	IC/MS	[M ‒ H]‒	4.16135	4.98259	5.32715	0.473407	1.79753	1.55828	1.25951	2.12602		0.634361		1.00886
	11	Cytidine-5'-monophosphate	CMP	C9H14N3O8P	323.052	C00055	HMDB00095	IC/MS	[M ‒ H]‒	8.54 ±0.09	2.2607e+07	9.36749e+06	1.69522e+07	6.47049e+06	2.06171e+07	1.32536e+07	1.80471e+07	8.24098e+06		PIPES (IS)	IC/MS	[M ‒ H]‒	0.0821573	0.0362916	0.0830329	0.0298688	0.0578246	0.0396892	0.0439612	0.0231817		0.953168		0.688548
	12	Coenzyme A	CoA	C21H36N7O16P3S	767.115	C00010	HMDB01423	IC/MS	[M ‒ H]‒	22.48 ±0.02	6.84295e+06	1.82265e+07	1.12644e+07	564571	3.68955e+06	4.15162e+06	2.58763e+06	8.80444e+06		PIPES (IS)	IC/MS	[M ‒ H]‒	0.0248684	0.0706133	0.0551738	0.00260615	0.0103481	0.0124324	0.00630323	0.0247668		0.605142		1.36389
	13	Cytidine 5'-triphosphate	CTP	C9H16N3O14P3	482.985	C00063	HMDB00082	IC/MS	[M ‒ H]‒	18.47 ±0.01	1.69194e+06	1.70205e+07	2.70127e+06	327166	3.69696e+06	1.27456e+07	1.36537e+07	2.13521e+07		PIPES (IS)	IC/MS	[M ‒ H]‒	0.00614877	0.065941	0.013231	0.00151025	0.0103688	0.0381677	0.0332592	0.0600631		0.204484		1.92272
	14	Deoxyadenosine 5'-triphosphate	dATP	C10H16N5O12P3	491.001	C00131	HMDB01532	IC/MS	[M ‒ H]‒	21.31 ±0.02	0	294612	0	0	0	224434	232225	344909		PIPES (IS)	IC/MS	[M ‒ H]‒	0	0.00114139	0	0	0	0.000672087	0.000565679	0.000970224		0		2.28527
	15	Deoxycytidine 5'-triphosphate	dCTP	C9H16N3O13P3	466.99	C00458	HMDB00998	IC/MS	[M ‒ H]‒	17.55 ±0.02	0	69142.5	0	0	0	85084.3	91984.2	148717		PIPES (IS)	IC/MS	[M ‒ H]‒	0	0.000267873	0	0	0	0.000254792	0.000224065	0.000418338		0		2.52128
	16	D-Fructose 1,6-bisphosphate	FBP	C6H14O12P2	339.996	C00354	HMDB01058	IC/MS	[M ‒ H]‒	17.82 ±0.02	1.27754e+08	6.4459e+08	2.13402e+08	6.68769e+07	1.22207e+08	1.50952e+08	1.665e+08	3.59232e+08		PIPES (IS)	IC/MS	[M ‒ H]‒	0.464278	2.49728	1.04526	0.308714	0.342754	0.452039	0.40558	1.01052		0.457183		1.78172
	17	D-Fructose 6-phosphate	F6P	C6H13O9P	260.03	C00085	HMDB00124	IC/MS	[M ‒ H]‒	9.84 ±0.02	6.76929e+06	2.02834e+07	9.15467e+06	7.32527e+06	6.15223e+06	2.87452e+07	2.19481e+07	5.72457e+07		PIPES (IS)	IC/MS	[M ‒ H]‒	0.0246007	0.0785822	0.0448401	0.0338146	0.0172551	0.0860801	0.0534635	0.161031		0.762285		2.07572
	18	D-Gluconic acid	Gluconic acid	C6H12O7	196.058	C00257	HMDB00625	IC/MS	[M ‒ H]‒	3.33 ±0.02	3.76575e+07	1.73982e+08	4.1985e+07	4.67605e+07	3.74919e+07	4.98136e+07	4.95427e+07	4.44259e+07		PIPES (IS)	IC/MS	[M ‒ H]‒	0.136854	0.674044	0.205645	0.215854	0.105153	0.149171	0.120682	0.124969		0.519793		0.965896
	19	D-Glucose 1-phosphate	G1P	C6H13O9P	260.03	C00103	HMDB01586	IC/MS	[M ‒ H]‒	7.05 ±0.02	1.11103e+07	1.72136e+07	1.2249e+07	6.32759e+06	1.62258e+07	2.8586e+07	3.56631e+07	4.44703e+07		PIPES (IS)	IC/MS	[M ‒ H]‒	0.0403765	0.0666891	0.0599961	0.0292092	0.0455085	0.0856033	0.0868723	0.125094		0.833184		1.61669
	20	D-Glucose 6-phosphate	G6P	C6H13O9P	260.03	C00092	HMDB01401	IC/MS	[M ‒ H]‒	9.61 ±0.01	2.938e+07	6.75024e+07	2.74232e+07	2.50506e+07	2.80569e+07	1.12035e+08	9.94995e+07	2.32058e+08		PIPES (IS)	IC/MS	[M ‒ H]‒	0.106772	0.261518	0.134321	0.115638	0.0786909	0.335499	0.242372	0.652775		0.6787		2.1612
	21	D-Glucuronic acid	Glucuronic acid	C6H10O7	194.043	C00191	HMDB00127	IC/MS	[M ‒ H]‒	5.74 ±0.02	1.91782e+06	2.3294e+07	1.94861e+06	1.69239e+06	1.49035e+06	3.06474e+06	1.52367e+06	879389		PIPES (IS)	IC/MS	[M ‒ H]‒	0.00696966	0.0902457	0.00954442	0.00781235	0.00417999	0.00917761	0.00371153	0.00247371		0.178539		0.46305
	22	D-Ribose 5-phosphate	R5P	C5H11O8P	230.019	C00117	HMDB01548	IC/MS	[M ‒ H]‒	10.43 ±0.02	4.07969e+07	2.70899e+07	2.22793e+07	1.17113e+08	2.62673e+07	2.12961e+07	2.4086e+07	2.27673e+07		PIPES (IS)	IC/MS	[M ‒ H]‒	0.148263	0.104952	0.109125	0.540612	0.0736719	0.0637729	0.0586713	0.0640441		2.56595		0.892834
	23	D-Sedoheputulose 7-phosphate	S7P	C7H15O10P	290.04	C05382	HMDB01068	IC/MS	[M ‒ H]‒	10.59 ±0.01	1.51924e+06	920448	1.41179e+06	2.49993e+07	1.55081e+06	1.67199e+06	1.46148e+06	1.61829e+06		PIPES (IS)	IC/MS	[M ‒ H]‒	0.00552116	0.00356601	0.00691502	0.115401	0.00434955	0.0050069	0.00356003	0.00455221		13.4603		0.867021
	24	Deoxythymidine 5'-diphosphate	dTDP	C10H16N2O11P2	402.023	C00363	HMDB01274	IC/MS	[M ‒ H]‒	19.64 ±0.01	391099	878382	1.1328e+06	0	440908	200586	339029	373253		PIPES (IS)	IC/MS	[M ‒ H]‒	0.00142132	0.00340304	0.00554851	0	0.00123661	0.000600671	0.000825845	0.00104996		1.1501		1.02096
	25	Deoxythymidine 5'-monophosphate	dTMP	C10H15N2O8P	322.057	C00364	HMDB01227	IC/MS	[M ‒ H]‒	14.28 ±0.02	640809	96432.2	254979	0	269756	184845	152250	135323		PIPES (IS)	IC/MS	[M ‒ H]‒	0.0023288	0.000373599	0.0012489	0	0.000756583	0.000553535	0.000370867	0.000380661		0.462145		0.573634
	26	Deoxythymidine 5'-triphosphate	dTTP	C10H17N2O14P3	481.989	C00459	HMDB01342	IC/MS	[M ‒ H]‒	23.55 ±0.02	209733	1.29251e+06	513377	0	504910	941500	1.41589e+06	1.60659e+06		PIPES (IS)	IC/MS	[M ‒ H]‒	0.000762205	0.00500747	0.00251455	0	0.00141612	0.0028194	0.00344897	0.00451932		0.435822		1.8813
	27	Flavin adenine dinucleotide	FAD	C27H33N9O15P2	785.157	C00016	HMDB01248	IC/MS	[M ‒ H]‒	23.93 ±0.03	5.06715e+06	4.27161e+06	4.10487e+06	4.21079e+06	2.20699e+06	2.09882e+06	1.99491e+06	2.87833e+06		PIPES (IS)	IC/MS	[M ‒ H]‒	0.0184148	0.0165491	0.0201059	0.0194377	0.00618995	0.0062851	0.00485943	0.00809668		1.13098		1.03856
	28	Flavin mononucleotide	FMN	C17H21N4O9P	456.105	C00061	HMDB01520	IC/MS	[M ‒ H]‒	22.54 ±0.02	2.8218e+06	2.57445e+06	2.67593e+06	2.73594e+06	1.64015e+06	1.55343e+06	1.5244e+06	2.36063e+06		PIPES (IS)	IC/MS	[M ‒ H]‒	0.0102549	0.00997396	0.0131069	0.0126296	0.00460012	0.00465189	0.00371331	0.00664041		1.27226		1.11908
	29	Fumaric acid	Fum	C4H4O4	116.011	C00122	HMDB00134	IC/MS	[M ‒ H]‒	10.64 ±0.01	1.85525e+08	2.10861e+08	1.73754e+08	2.18628e+08	1.17065e+08	1.58844e+08	1.89666e+08	1.61977e+08		PIPES (IS)	IC/MS	[M ‒ H]‒	0.674229	0.81692	0.851059	1.00922	0.328332	0.475673	0.462008	0.455639		1.24755		1.14135
	30	Guanosine 5'-diphosphate	GDP	C10H15N5O11P2	443.024	C00035	HMDB01201	IC/MS	[M ‒ H]‒	24.38 ±0.01	3.87537e+07	4.73456e+07	5.55755e+07	1.87332e+07	2.4143e+07	1.70883e+07	2.56667e+07	2.42704e+07		PIPES (IS)	IC/MS	[M ‒ H]‒	0.140837	0.183427	0.272212	0.0864756	0.0677138	0.0511724	0.0625218	0.0682723		1.10616		1.10016
	31	Glycerol 3-phosphate	G3P	C3H9O6P	172.014	C00093	HMDB00126	IC/MS	[M ‒ H]‒	7.01 ±0.01	6.00347e+08	5.16345e+08	3.89649e+08	1.79629e+08	3.51192e+08	4.51462e+08	3.41802e+08	5.13261e+08		PIPES (IS)	IC/MS	[M ‒ H]‒	2.18176	2.00043	1.90853	0.829195	0.984988	1.35194	0.8326	1.44379		0.654615		0.974097
	32	Guanosine 5'-monophosphate	GMP	C10H14N5O8P	363.058	C00144	HMDB01397	IC/MS	[M ‒ H]‒	19.21 ±0.01	9.15548e+07	3.19244e+07	6.21674e+07	8.23997e+07	5.9949e+07	4.72563e+07	4.31168e+07	3.44559e+07		PIPES (IS)	IC/MS	[M ‒ H]‒	0.332725	0.123682	0.3045	0.38037	0.168139	0.141513	0.105029	0.0969239		1.50057		0.652192
	33	Guanosine 5'-triphosphate	GTP	C10H16N5O14P3	522.991	C00044	HMDB01273	IC/MS	[M ‒ H]‒	27.67 ±0.01	1.41e+07	6.29772e+07	2.658e+07	4.9882e+06	2.43864e+07	4.81391e+07	6.13344e+07	6.92299e+07		PIPES (IS)	IC/MS	[M ‒ H]‒	0.0512416	0.243987	0.13019	0.0230263	0.0683966	0.144157	0.149405	0.194743		0.518977		1.61911
	34	Inosine 5'-monophosphate	IMP	C10H13N4O8P	348.047	C00130	HMDB00175	IC/MS	[M ‒ H]‒	18.76 ±0.04	1.38671e+09	6.94856e+08	9.49509e+08	1.23369e+09	1.69419e+09	1.84009e+09	2.00585e+09	1.87609e+09		PIPES (IS)	IC/MS	[M ‒ H]‒	5.03953	2.69202	4.65075	5.69493	4.7517	5.51031	4.88608	5.2774		1.33811		0.990398
	35	Isocitric acid	IsoCit	C6H8O7	192.027	C00311	HMDB00193	IC/MS	[M ‒ H]‒	14.66 ±0.03	1.14318e+08	1.75503e+08	1.28416e+08	2.72837e+07	0	0	0	0		PIPES (IS)	IC/MS	[M ‒ H]‒	0.41545	0.679937	0.628991	0.125946	0	0	0	0		0.689196		#DIV/0!
	36	Malic acid	Mal	C4H6O5	134.022	C00149	HMDB00744	IC/MS	[M ‒ H]‒	8.41 ±0.01	2.10432e+09	2.35208e+09	2.09515e+09	2.53844e+09	1.58607e+09	1.91198e+09	2.10569e+09	2.00397e+09		PIPES (IS)	IC/MS	[M ‒ H]‒	7.64743	9.11245	10.2622	11.7178	4.44845	5.72559	5.12928	5.63714		1.31147		1.05822
	37	Nicotinamide adenine dinucleotide	NAD	C21H27N7O14P2	663.109	C00003	HMDB00902	IC/MS	[M ‒ H]‒	7.9 ±0.03	2.67232e+06	6.25155e+06	5.13458e+06	0	5.107e+06	6.74259e+06	8.2251e+06	1.04213e+07		PIPES (IS)	IC/MS	[M ‒ H]‒	0.00971164	0.0242198	0.0251495	0	0.0143236	0.0201913	0.0200356	0.0293148		0.741185		1.42983
	38	Reduced nicotinamide adenine dinucleotide	NADH	C21H29N7O14P2	665.125	C00004	HMDB01487	IC/MS	[M ‒ H]‒	14.82 ±0.02	9.07735e+06	3.27341e+07	6.72293e+06	1.02342e+06	9.2813e+06	6.38578e+06	8.47691e+06	1.46536e+07		PIPES (IS)	IC/MS	[M ‒ H]‒	0.0329885	0.126819	0.0329293	0.00472429	0.0260312	0.0191228	0.020649	0.0412204		0.235619		1.37019
	39	Reduced nicotinamide adenine dinucleotide phosphate	NADPH	C21H30N7O17P3	745.091	C00005	HMDB00221	IC/MS	[M ‒ H]‒	21.4 ±0.02	3.95129e+06	3.97283e+06	3.39117e+06	384202	450677	205708	91514.1	388221		PIPES (IS)	IC/MS	[M ‒ H]‒	0.0143596	0.0153916	0.0166102	0.00177354	0.00126401	0.00061601	0.00022292	0.00109206		0.617914		0.699449
	40	Phosphoenolpyruvic acid	PEP	C3H5O6P	167.982	C00074	HMDB00263	IC/MS	[M ‒ H]‒	15.19 ±0.01	2.16134e+07	7.97254e+07	8.8955e+06	7.07762e+06	2.87087e+07	5.90233e+07	3.57568e+07	7.94066e+07		PIPES (IS)	IC/MS	[M ‒ H]‒	0.0785465	0.308873	0.0435707	0.0326714	0.0805193	0.17675	0.0871004	0.22337		0.196795		1.20679
	41	Phosphoribosyl pyrophosphate	PRPP	C5H13O14P3	389.952	C00119	HMDB00280	IC/MS	[M ‒ H]‒	20.05 ±0.01	1.60496e+06	2.58226e+06	2.42207e+06	313695	1.89116e+06	3.38854e+06	5.86953e+06	3.44409e+06		PIPES (IS)	IC/MS	[M ‒ H]‒	0.00583267	0.0100042	0.0118634	0.00144807	0.00530412	0.0101473	0.0142976	0.00968818		0.840537		1.55234
	42	Phosphoric acid	Phosphoric acid	H3O4P	97.9769	C00009	HMDB02142	IC/MS	[M ‒ H]‒	12.7 ±0.03	5.11614e+09	4.10239e+09	3.8855e+09	5.59653e+09	6.24769e+09	8.33037e+09	1.02879e+10	9.66778e+09		PIPES (IS)	IC/MS	[M ‒ H]‒	18.5929	15.8935	19.0314	25.8345	17.5229	24.946	25.0603	27.1953		1.30097		1.23045
	43	Pyruvic acid	Pyr	C3H4O3	88.016	C00022	HMDB00243	IC/MS	[M ‒ H]‒	4.43 ±0.01	6.57485e+07	8.88166e+07	6.22176e+07	2.46915e+07	1.85293e+08	2.89994e+08	4.2203e+08	3.41858e+08		PIPES (IS)	IC/MS	[M ‒ H]‒	0.238941	0.344094	0.304746	0.11398	0.519691	0.868411	1.02803	0.961641		0.718183		1.43337
	44	Succinic acid	Suc	C4H6O4	118.027	C00042	HMDB00254	IC/MS	[M ‒ H]‒	8.36 ±0.01	6.71853e+07	2.9753e+08	4.49147e+08	4.25421e+07	2.01389e+08	2.7491e+08	3.49418e+08	2.73717e+08		PIPES (IS)	IC/MS	[M ‒ H]‒	0.244162	1.15269	2.19995	0.196381	0.564836	0.823243	0.85115	0.769962		1.71552		1.16788
	45	Thiamine pyrophosphate	ThPP	C12H18N4O7P2S	424.037	C00068	HMDB01372	IC/MS	[M ‒ H]‒	22.25 ±0.03	1.37394e+06	1.3779e+06	1.09331e+06	877499	367881	386449	445721	692849		PIPES (IS)	IC/MS	[M ‒ H]‒	0.00499312	0.00533829	0.00535512	0.00405068	0.00103179	0.00115726	0.00108574	0.00194897		0.910408		1.38631
	46	Uridine 5'-diphosphate	UDP	C9H14N2O12P2	404.002	C00015	HMDB00295	IC/MS	[M ‒ H]‒	20.86 ±0.01	1.6603e+07	6.13995e+07	2.68741e+07	4.40495e+06	1.40477e+07	1.85525e+07	2.2332e+07	3.23904e+07		PIPES (IS)	IC/MS	[M ‒ H]‒	0.060338	0.237874	0.131631	0.0203339	0.0393995	0.0555571	0.0543988	0.0911137		0.509586		1.53241
	47	Uridine 5'-monophosphate	UMP	C9H13N2O9P	324.036	C00105	HMDB00288	IC/MS	[M ‒ H]‒	15.65 ±0.01	9.41738e+07	5.25157e+07	7.4844e+07	2.80718e+07	7.42831e+07	5.18324e+07	7.09336e+07	3.95099e+07		PIPES (IS)	IC/MS	[M ‒ H]‒	0.342243	0.203457	0.366591	0.129584	0.208342	0.155217	0.172788	0.111141		0.909245		0.780972
	48	Uridine 5'-triphosphate	UTP	C9H15N2O15P3	483.969	C00075	HMDB00285	IC/MS	[M ‒ H]‒	24.52 ±0.01	9.22066e+06	8.04502e+07	1.24007e+07	2.42637e+06	2.41323e+07	7.17627e+07	7.75193e+07	1.16987e+08		PIPES (IS)	IC/MS	[M ‒ H]‒	0.0335094	0.311681	0.0607394	0.0112005	0.0676839	0.214899	0.18883	0.329082		0.208407		1.83278
	49	Alpha-Hydroxyisobutyric acid	2-Hydroxyisobutyric acid	C4H8O3	104.047	－	HMDB00729	IC/MS	[M ‒ H]‒	3.45 ±0.03	6.18897e+07	1.05528e+08	3.03438e+08	3.39751e+08	1.69732e+08	1.73025e+08	4.75166e+08	4.36625e+08		PIPES (IS)	IC/MS	[M ‒ H]‒	0.224917	0.408839	1.48626	1.56835	0.476048	0.518137	1.15746	1.22822		4.81984		2.39963
	50	3-Hydroxypropionic acid	3-Hydroxypropionic acid	C3H6O3	90.0317	C01013	HMDB00700	IC/MS	[M ‒ H]‒	3.49 ±0.03	9.19867e+09	9.02293e+09	6.31423e+09	1.31848e+10	2.07131e+10	2.40612e+10	2.46763e+10	2.45782e+10		PIPES (IS)	IC/MS	[M ‒ H]‒	33.4295	34.9567	30.9275	60.8634	58.0939	72.0533	60.1092	69.138		1.34224		0.993084
	51	2-Hydroxy-3-methylbutyric acid	2-Hydroxyisovaleric acid	C5H10O3	118.063	－	HMDB00407	IC/MS	[M ‒ H]‒	4.18 ±0.01	1.83898e+07	1.92067e+07	1.60099e+07	2.53684e+07	1.90449e+07	2.07779e+07	3.23588e+07	3.14798e+07		PIPES (IS)	IC/MS	[M ‒ H]‒	0.0668314	0.0744108	0.0784175	0.117105	0.0534151	0.0622212	0.0788232	0.0885523		1.3843		1.44743
	52	Methylmalonic acid	Methylmalonic acid	C4H6O4	118.027	C02170	HMDB00202	IC/MS	[M ‒ H]‒	8.36 ±0.01	6.51082e+07	2.86622e+08	4.40618e+08	4.16462e+07	1.99541e+08	2.72889e+08	3.4725e+08	2.70706e+08		PIPES (IS)	IC/MS	[M ‒ H]‒	0.236614	1.11043	2.15818	0.192246	0.559652	0.817189	0.84587	0.761491		1.74487		1.16743
	53	Leucinic acid	Leucinic acid	C6H12O3	132.079	－	HMDB00665	IC/MS	[M ‒ H]‒	5.22 ±0.03	3.27795e+06	6.16e+06	3.569e+06	4.89525e+06	4.31106e+06	4.06759e+06	5.9094e+06	6.10893e+06		PIPES (IS)	IC/MS	[M ‒ H]‒	0.0119126	0.0238651	0.0174812	0.0225973	0.0120912	0.0121807	0.0143948	0.0171843		1.12021		1.30105
	54	Orotic acid	Orotic acid	C5H4N2O4	156.017	C00295	HMDB00226	IC/MS	[M ‒ H]‒	13.2 ±0.02	827494	5.95712e+06	568129	1.18162e+06	1.61338e+06	994317	517686	462153		PIPES (IS)	IC/MS	[M ‒ H]‒	0.00300725	0.0230791	0.00278273	0.00545453	0.00452505	0.00297757	0.00126104	0.00130003		0.315769		0.341356
	55	Hippuric acid	Hippuric acid	C9H9NO3	179.058	C01586	HMDB00714	IC/MS	[M ‒ H]‒	8.67 ±0.02	641445	3.75955e+07	171330	731846	406429	5.0406e+06	301211	1.09872e+06		PIPES (IS)	IC/MS	[M ‒ H]‒	0.00233112	0.145653	0.000839185	0.00337832	0.00113991	0.0150945	0.000733724	0.00309068		0.0284997		0.235574
	56	DL-4-Hydroxyphenyllactic acid	4-Hydroxyphenyllactic acid	C9H10O4	182.058	－	HMDB00755	IC/MS	[M ‒ H]‒	13.45 ±0.02	2.5984e+06	5.45271e+06	1.93945e+06	6.1473e+06	2.5159e+06	2.22499e+06	1.99706e+06	5.91649e+06		PIPES (IS)	IC/MS	[M ‒ H]‒	0.00944302	0.021125	0.00949956	0.028377	0.00705633	0.00666293	0.00486466	0.016643		1.23909		1.5677
	57	Uric acid	Uric acid	C5H4N4O3	168.028	C00366	HMDB00289	IC/MS	[M ‒ H]‒	15.88 ±0.02	2.05084e+07	3.34525e+07	1.77357e+07	2.33937e+07	1.34707e+07	1.37281e+07	2.04679e+07	2.01641e+07		PIPES (IS)	IC/MS	[M ‒ H]‒	0.0745309	0.129602	0.0868703	0.107989	0.0377811	0.0411099	0.049858	0.0567214		0.954571		1.35097
	58	2,3-Pyridinedicarboxylic acid	Quinolinic acid	C7H5NO4	167.022	C03722	HMDB00232	IC/MS	[M ‒ H]‒	10.53 ±0.02	95179.3	1.1226e+06	0	0	105555	178754	75229.8	0		PIPES (IS)	IC/MS	[M ‒ H]‒	0.000345897	0.00434918	0	0	0.000296049	0.000535295	0.000183253	0		0		0.22043
	59	D-Fructose 1-phosphate	F1P	C6H13O9P	260.03	C01094	HMDB60467	IC/MS	[M ‒ H]‒	9.05 ±0.02	5.13684e+06	2.27798e+07	4.00248e+06	1.09869e+07	7.01973e+06	5.43375e+06	6.87461e+06	1.01713e+07		PIPES (IS)	IC/MS	[M ‒ H]‒	0.0186681	0.0882537	0.0196044	0.0507175	0.0196882	0.0162718	0.0167459	0.0286118		0.657694		1.26134
	60	D-Galactose 1-phosphate	Ga1P	C6H13O9P	260.03	C03384	HMDB00645	IC/MS	[M ‒ H]‒	6.83 ±0.02	1.33237e+07	1.28619e+07	8.0678e+06	1.72321e+07	8.85321e+06	1.35446e+07	1.57345e+07	1.76402e+07		PIPES (IS)	IC/MS	[M ‒ H]‒	0.0484203	0.0498295	0.0395166	0.079546	0.0248306	0.0405603	0.0383277	0.0496217		1.21183		1.34498
	61	2-Phospho-D-glyceric acid	2-PGA	C3H7O7P	185.993	C00631	HMDB03391	IC/MS	[M ‒ H]‒	13.14 ±0.01	8.79199e+07	2.47389e+08	5.68229e+07	2.76008e+07	8.22143e+07	1.33376e+08	7.80069e+07	2.03823e+08		PIPES (IS)	IC/MS	[M ‒ H]‒	0.319515	0.958438	0.278322	0.12741	0.230586	0.399405	0.190018	0.573351		0.317486		1.21171
	62	D-Glucaric acid	Glucaric acid	C6H10O8	210.038	C00818	HMDB29881	IC/MS	[M ‒ H]‒	8.18 ±0.02	1.30871e+08	1.25876e+08	1.19859e+08	1.1829e+08	7.45377e+07	7.32369e+07	9.60103e+07	8.50838e+07		PIPES (IS)	IC/MS	[M ‒ H]‒	0.475605	0.48767	0.587075	0.546045	0.209056	0.219314	0.233873	0.239339		1.17632		1.10468
	63	2-Hydroxy glutaric acid	2-Hydroxy glutaric acid	C5H8O5	148.037	－	HMDB00606	IC/MS	[M ‒ H]‒	8.17 ±0.01	3.74582e+08	2.90057e+08	3.31442e+08	2.62029e+08	1.16477e+08	1.00154e+08	1.15555e+08	1.79377e+08		PIPES (IS)	IC/MS	[M ‒ H]‒	1.36129	1.12374	1.62342	1.20957	0.326683	0.299918	0.281483	0.504585		1.14002		1.25449
	64	UDP-alpha-D-galactose	UDP-Galac	C15H24N2O17P2	566.055	C00052	－	IC/MS	[M ‒ H]‒	15.33 ±0.02	533024	490644	601856	74907.3	371262	246828	395642	425371		PIPES (IS)	IC/MS	[M ‒ H]‒	0.00193709	0.00190086	0.00294793	0.000345784	0.00104128	0.000739148	0.000963749	0.00119656		0.858195		1.21337
	65	D-Mannose 6-phosphate	M6P	C6H13O9P	260.03	C00275	HMDB01078	IC/MS	[M ‒ H]‒	10.03 ±0.01	1.31664e+07	5.0131e+07	1.27566e+07	1.27679e+07	4.05019e+07	1.49984e+08	1.10017e+08	1.7164e+08		PIPES (IS)	IC/MS	[M ‒ H]‒	0.0478489	0.194218	0.0624824	0.0589388	0.113596	0.44914	0.267992	0.48282		0.501601		1.33422
	66	3-Hydroxy-3-methylglutaric acid	3-Hydroxymethylglutaric acid	C6H10O5	162.053	C03761	HMDB00355	IC/MS	[M ‒ H]‒	7.96 ±0.01	9.04883e+06	3.66254e+07	8.73078e+06	1.00452e+07	8.68049e+06	9.12195e+06	8.47323e+06	1.14414e+07		PIPES (IS)	IC/MS	[M ‒ H]‒	0.0328849	0.141894	0.0427639	0.0463704	0.0243462	0.0273165	0.02064	0.0321846		0.509982		1.02249
	67	2-Ketoadipic acid	2-Ketoadipic acid	C6H8O5	160.037	C00322	HMDB00225	IC/MS	[M ‒ H]‒	9.88 ±0.02	0	1.37169e+06	0	0	0	0	638687	0		PIPES (IS)	IC/MS	[M ‒ H]‒	0	0.00531423	0	0	0	0	0.00155578	0		0		#DIV/0!
	68	D-Glucose	Glucose	C6H12O6	180.16	C00031	HMDB00122	IC/MS	[M ‒ H]‒	2.93 ±0.02	2.50254e+08	3.23883e+08	1.22278e+08	3.43284e+08	3.92826e+08	4.2038e+08	4.04006e+08	3.45124e+08		PIPES (IS)	IC/MS	[M ‒ H]‒	0.909463	1.25479	0.598924	1.58465	1.10176	1.25886	0.984122	0.970828		1.00893		0.828151
	69	Thymidine	Thymidine	C10H14N2O5	242.09	C00214	HMDB00273	IC/MS	[M ‒ H]‒	5.7 ±0.03	347182	642198	251933	520933	305041	513060	813649	640805		PIPES (IS)	IC/MS	[M ‒ H]‒	0.00126172	0.00248801	0.00123398	0.00240471	0.000855546	0.0015364	0.00198198	0.00180257		0.970389		1.5822
	70	Uracil	Uracil	C4H4N2O2	112.027	C00106	HMDB00300	IC/MS	[M ‒ H]‒	5.93 ±0.04	2.88182e+06	3.1994e+06	2.16905e+06	1.60599e+07	2.57982e+06	2.17632e+06	2.93584e+06	4.166e+06		PIPES (IS)	IC/MS	[M ‒ H]‒	0.010473	0.0123952	0.0106241	0.0741353	0.0072356	0.00651718	0.00715145	0.0117189		3.70644		1.37211
	71	Uridine	Uridine	C9H12N2O6	244.07	C00299	HMDB00296	IC/MS	[M ‒ H]‒	6.46 ±0.03	5.48319e+06	3.27315e+06	3.36282e+06	2.40474e+07	3.75647e+06	2.90132e+06	3.35146e+06	3.17375e+06		PIPES (IS)	IC/MS	[M ‒ H]‒	0.0199268	0.0126809	0.0164713	0.111007	0.0105357	0.00868826	0.00816385	0.0089277		3.90945		0.889073
	72	O-Acetyl-L-homoserine	O-Acetyl-homoSer	C6H11NO4	161.069	C01077	HMDB29423	IC/MS	[M ‒ H]‒	3.2 ±0.02	4.16281e+06	5.10524e+07	5.87703e+06	5.16703e+06	7.0334e+06	1.39504e+07	1.45918e+07	1.12082e+07		PIPES (IS)	IC/MS	[M ‒ H]‒	0.0151283	0.197788	0.028786	0.0238518	0.0197266	0.0417756	0.0355443	0.0315285		0.247224		1.09058
	73	Acetylglycine	Acetyl-Gly	C4H7NO3	117.043	－	HMDB00532	IC/MS	[M ‒ H]‒	3.26 ±0.01	1.37868e+07	3.49177e+07	2.26862e+07	1.23266e+07	1.06861e+07	1.55533e+07	2.82516e+07	1.48761e+07		PIPES (IS)	IC/MS	[M ‒ H]‒	0.0501034	0.135278	0.111119	0.0569014	0.0299713	0.0465756	0.0688183	0.0418462		0.906346		1.44571
	74	Isovalerylglycine	IsovalerylGly	C7H13NO3	159.09	－	HMDB00678	IC/MS	[M ‒ H]‒	4.04 ±0.04	214803	2.11548e+07	858456	54410.8	181338	2.44577e+06	748110	135922		PIPES (IS)	IC/MS	[M ‒ H]‒	0.000780628	0.0819581	0.00420477	0.000251169	0.000508597	0.00732406	0.00182233	0.000382346		0.0538555		0.281472
	75	N-Acetyl-L-aspartic acid	N-Acetyl-Asp	C6H9NO5	175.048	C01042	HMDB00812	IC/MS	[M ‒ H]‒	7.4 ±0.06	1.10737e+08	1.69801e+08	7.72737e+07	7.02516e+07	1.89111e+08	1.25394e+08	1.10745e+08	2.47103e+08		PIPES (IS)	IC/MS	[M ‒ H]‒	0.402435	0.657844	0.378491	0.324293	0.530399	0.375503	0.269765	0.695097		0.662829		1.06508
	76	N-Acetyl-L-leucine	N-Acetyl-Leu	C8H15NO3	173.105	C02710	HMDB11756	IC/MS	[M ‒ H]‒	4.02 ±0.04	205657	1.6737e+06	239624	461116	78266.7	256125	85345	278259		PIPES (IS)	IC/MS	[M ‒ H]‒	0.000747392	0.00648428	0.00117369	0.00212859	0.000219514	0.000766987	0.000207893	0.000782737		0.456641		1.00418
	77	Allantoin	Allantoin	C4H6N4O3	158.044	C01551	HMDB00462	IC/MS	[M ‒ H]‒	4 ±0.03	2.94071e+07	1.38661e+08	3.71697e+07	2.78788e+07	2.55889e+07	3.94384e+07	3.7487e+07	2.37482e+07		PIPES (IS)	IC/MS	[M ‒ H]‒	0.10687	0.537202	0.182059	0.128693	0.0717691	0.118102	0.0913149	0.0668034		0.482481		0.832767
	78	Taurine	Taurine	C2H7NO3S	125.015	C00245	HMDB00251	IC/MS	[M ‒ H]‒	3.65 ±0.04	5.27066e+09	5.2107e+09	4.31786e+09	4.65498e+09	3.49859e+09	4.32624e+09	4.47906e+09	4.61347e+09		PIPES (IS)	IC/MS	[M ‒ H]‒	19.1544	20.1873	21.1492	21.4881	9.81249	12.9553	10.9106	12.9776		1.08377		1.04921
	79	N-Acetyl-DL-alanine	N-Acetyl-Ala	C5H9NO3	131.058	－	HMDB00766	IC/MS	[M ‒ H]‒	3.24 ±0.01	2.42133e+06	6.28507e+06	2.72276e+06	8.20821e+06	2.5577e+06	2.91005e+06	5.08511e+06	4.86635e+06		PIPES (IS)	IC/MS	[M ‒ H]‒	0.00879952	0.0243497	0.0133362	0.0378904	0.00717359	0.00871439	0.0123869	0.013689		1.54534		1.64123
	80	N-Acetyl-L-glutamine	N-Acetyl-Gln	C7H12N2O4	188.08	－	HMDB06029	IC/MS	[M ‒ H]‒	3.07 ±0.01	1.29858e+06	2.4595e+07	1.15774e+06	1.07252e+06	1.00758e+06	2.91522e+06	1.18907e+06	1.31763e+06		PIPES (IS)	IC/MS	[M ‒ H]‒	0.00471924	0.0952862	0.00567068	0.0049509	0.00282596	0.00872988	0.00289646	0.00370647		0.10621		0.571394
	81	O-Phospho-L-serine	O-Phospho-Ser	C3H8NO6P	185.009	C01005	HMDB01721	IC/MS	[M ‒ H]‒	12.23 ±0.02	293832	304621	162679	367658	330165	234509	215163	401404		PIPES (IS)	IC/MS	[M ‒ H]‒	0.00106783	0.00118016	0.000796811	0.00169717	0.000926013	0.000702258	0.000524118	0.00112914		1.10942		1.01535
	82	O-Succinyl-L-homoserine	O-Succinyl-homoSer	C8H13NO6	219.074	C01118	－	IC/MS	[M ‒ H]‒	7.04 ±0.05	327656	7.8848e+06	792912	488109	258476	560418	857128	0		PIPES (IS)	IC/MS	[M ‒ H]‒	0.00119075	0.0305474	0.00388373	0.00225319	0.000724948	0.00167822	0.00208789	0		0.193361		0.868806
	83	1,6-Anhydro-beta-D-glucose	Levoglucosan	C6H10O5	162.053	－	HMDB00640	IC/MS	[M ‒ H]‒	2.94 ±0.02	1.70498e+07	2.19989e+07	7.29577e+06	2.53765e+07	3.00402e+07	3.21777e+07	3.05275e+07	2.54399e+07		PIPES (IS)	IC/MS	[M ‒ H]‒	0.0619617	0.0852284	0.0357351	0.117142	0.0842535	0.096359	0.0743622	0.0715619		1.03864		0.807941
	84	L-Arabinose	Arabinose	C5H10O5	150.053	C00259	HMDB00646	IC/MS	[M ‒ H]‒	2.96 ±0.03	3.87887e+06	5.9002e+06	1.88867e+06	3.14237e+07	5.9564e+06	5.80147e+06	5.61506e+06	4.96382e+06		PIPES (IS)	IC/MS	[M ‒ H]‒	0.0140964	0.0228586	0.0092508	0.145057	0.0167059	0.017373	0.0136778	0.0139631		4.17556		0.811087
	85	D-Arabitol	Arabitol	C5H12O5	152.068	C01904	HMDB00568	IC/MS	[M ‒ H]‒	2.82 ±0.02	4.17647e+07	3.65209e+07	6.08786e+07	1.48438e+08	3.98612e+07	3.98219e+07	6.1958e+07	5.32936e+07		PIPES (IS)	IC/MS	[M ‒ H]‒	0.15178	0.14149	0.298187	0.685214	0.111799	0.11925	0.150924	0.149914		3.35324		1.30205
	86	meso-Erythritol	meso-Erythritol	C4H10O4	122.058	－	HMDB02994	IC/MS	[M ‒ H]‒	2.79 ±0.03	0	667500	0	0	145889	319807	255424	146696		PIPES (IS)	IC/MS	[M ‒ H]‒	0	0.00258604	0	0	0.000409174	0.00095769	0.000622189	0.000412654		0		0.757093
	87	Galactitol	Galactitol	C6H14O6	182.079	C01697	HMDB00107	IC/MS	[M ‒ H]‒	2.79 ±0.02	9.80017e+06	1.59061e+07	6.9678e+06	9.29762e+06	1.02133e+07	1.29684e+07	1.41922e+07	1.12121e+07		PIPES (IS)	IC/MS	[M ‒ H]‒	0.0356154	0.0616234	0.0341287	0.0429193	0.0286452	0.038835	0.0345709	0.0315394		0.792359		0.979698
	88	Glycerol	Glycerol	C3H8O3	92.0473	C00116	HMDB00131	IC/MS	[M ‒ H]‒	2.81 ±0.03	920229	797020	2.04725e+06	5.84064e+06	4.23124e+06	4.01911e+06	6.06926e+06	5.52551e+06		PIPES (IS)	IC/MS	[M ‒ H]‒	0.00334426	0.00308782	0.0100276	0.0269613	0.0118673	0.0120356	0.0147842	0.0155432		5.75069		1.26877
	89	Lactitol	Lactitol	C12H24O11	344.132	C13542	HMDB40937	IC/MS	[M ‒ H]‒	2.77 ±0.03	2.12432e+06	1.82854e+06	1.45408e+06	1.64429e+06	1.1071e+06	1.57493e+06	1.22174e+06	966995		PIPES (IS)	IC/MS	[M ‒ H]‒	0.00772014	0.00708416	0.00712216	0.0075903	0.00310508	0.00471626	0.00297606	0.00272014		0.993796		0.72829
	90	Beta-Lactose	Beta-Lactose	C12H22O11	342.116	C01970	HMDB41627	IC/MS	[M ‒ H]‒	2.97 ±0.02	5.45374e+06	2.99502e+06	2.50755e+06	1.25329e+07	7.08731e+06	7.14138e+06	7.70235e+06	6.11239e+06		PIPES (IS)	IC/MS	[M ‒ H]‒	0.0198198	0.0116033	0.0122821	0.0578541	0.0198777	0.0213855	0.0187622	0.0171941		2.23199		0.871389
	91	D-Erythrose	Erythrose	C4H8O4	120.042	C01796	HMDB02649	IC/MS	[M ‒ H]‒	2.93 ±0.02	1.29328e+07	1.61466e+07	4.97895e+06	1.63e+07	1.96816e+07	2.23075e+07	1.81778e+07	1.8058e+07		PIPES (IS)	IC/MS	[M ‒ H]‒	0.047	0.0625553	0.0243872	0.0752434	0.055201	0.0668017	0.0442796	0.0507968		0.90941		0.779297
	92	Na-Acetyl-L-asparagine	N-Acetyl-Asn	C6H10N2O4	174.064		HMDB06028	IC/MS	[M ‒ H]‒	3.12 ±0.02	419896	4.8587e+06	482208	409109	208919	606383	400798	502333		PIPES (IS)	IC/MS	[M ‒ H]‒	0.00152597	0.0188236	0.00236188	0.00188851	0.000585956	0.00181586	0.000976307	0.00141305		0.208869		0.994813
	93	Pantothenate	Pantothenate	C9H17NO5	219.111	C00864	HMDB00210	IC/MS	[M ‒ H]‒	3.51 ±0.03	8.98824e+06	1.01877e+07	1.14876e+07	1.83424e+07	5.05265e+06	5.33144e+06	3.83224e+06	7.66123e+06		PIPES (IS)	IC/MS	[M ‒ H]‒	0.0326647	0.0394693	0.0562668	0.0846716	0.0141712	0.0159654	0.00933499	0.0215509		1.95384		1.02486
	94	D-Sorbitol 6-phosphate	Sorbitol-6P	C6H15O9P	262.045	C01096	HMDB05831	IC/MS	[M ‒ H]‒	6.78 ±0.02	1.7771e+06	1.30296e+06	1.82827e+06	1.22489e+06	1.13354e+06	2.03048e+06	2.65009e+06	1.60341e+06		PIPES (IS)	IC/MS	[M ‒ H]‒	0.00645828	0.00504795	0.00895497	0.00565431	0.00317925	0.00608045	0.00645537	0.00451038		1.26968		1.18425
	95	Uridine 5’-diphosphate (UDP)-D-glucuronate	UDP-glucuronate	C15H22N2O18P2	580.034	C00167	HMDB00935	IC/MS	[M ‒ H]‒	21.76 ±0.03	717627	462467	584206	547743	541752	315091	481085	675157		PIPES (IS)	IC/MS	[M ‒ H]‒	0.00260797	0.00179169	0.00286148	0.00252847	0.00151945	0.000943566	0.00117188	0.00189921		1.22508		1.24688
	96	UDP-N-acetyl-alpha-D-glucosamine	UDP-N-acetyl-glucosamine	C17H27N3O17P2	607.082	C00043	HMDB00290	IC/MS	[M ‒ H]‒	14.45 ±0.01	1.60428e+07	1.77725e+07	1.37545e+07	2.72148e+06	1.14311e+07	1.04132e+07	1.23688e+07	1.45614e+07		PIPES (IS)	IC/MS	[M ‒ H]‒	0.058302	0.0688544	0.0673703	0.0125628	0.0320608	0.0311833	0.0301293	0.0409609		0.62862		1.12406
	97	Inosine 5'-triphosphate	ITP	C10H15N4O14P3	507.98	C00081	HMDB00189	IC/MS	[M ‒ H]‒	27.36 ±0.02	107394	145681	0	0	475463	2.7646e+06	1.85078e+06	2.79807e+06		PIPES (IS)	IC/MS	[M ‒ H]‒	0.000390286	0.0005644	0	0	0.00133353	0.00827884	0.00450833	0.00787094		0		1.28785
	98	2,3-Bisphosphoglycerate	2,3-BPG	C3H8O10P2	265.959	C03339	HMDB01294	IC/MS	[M ‒ H]‒	19.83 ±0.01	3.38167e+07	7.67827e+07	3.34741e+07	1.73269e+06	1.16396e+07	1.96408e+07	2.13111e+07	3.29838e+07		PIPES (IS)	IC/MS	[M ‒ H]‒	0.122895	0.297472	0.163958	0.00799837	0.0326456	0.0588161	0.051912	0.0927828		0.409062		1.58202
	99	Inosine 5'-diphosphate	IDP	C10H14N4O11P2	428.013	C00104	HMDB03335	IC/MS	[M ‒ H]‒	24.02 ±0.02	235841	181029	117885	0	451525	706727	623974	539923		PIPES (IS)	IC/MS	[M ‒ H]‒	0.000857086	0.000701344	0.000577408	0	0.00126639	0.00211635	0.00151995	0.0015188		0.370506		0.898307
	100	2-Dehydro-D-gluconate	2-Dehydrogluconate	C6H10O7	194.043	C06473	HMDB11732	IC/MS	[M ‒ H]‒	4.04 ±0.04	193226	4.31072e+06	407878	52605.1	195655	284421	251380	107486		PIPES (IS)	IC/MS	[M ‒ H]‒	0.000702213	0.0167006	0.00199781	0.000242834	0.000548752	0.000851723	0.00061234	0.000302357		0.128752		0.653133
	101	1,5-Anhydro-D-glucitol	1,5-AG	C6H12O5	164.068	C07326	HMDB02712	IC/MS	[M ‒ H]‒	2.82 ±0.04	1.34395e+06	2.5168e+06	548402	419513	2.42229e+06	3.06862e+06	861665	852387		PIPES (IS)	IC/MS	[M ‒ H]‒	0.00488414	0.00975061	0.00268611	0.00193654	0.00679379	0.00918925	0.00209894	0.00239775		0.315868		0.281341
	102	1-Kestose	1-Kestose	C18H32O16	504.169	－	HMDB11729	IC/MS	[M ‒ H]‒	3.03 ±0.05	2.36974e+06	6829.73	425052	423199	4.40992e+06	5.09434e+06	5.3928e+06	3.89038e+06		PIPES (IS)	IC/MS	[M ‒ H]‒	0.00861203	2.64598e-05	0.00208193	0.00195356	0.0123685	0.0152554	0.0131364	0.0109436		0.467152		0.871708
	103	Pyridoxal 5'-phosphate	Pyridoxal-5P	C8H10NO6P	247.025	C00018	HMDB01491	IC/MS	[M ‒ H]‒	18.6 ±0.04	1.40505e+06	2.96338e+06	2.01924e+06	980428	1.32438e+06	867347	1.0404e+06	1.33937e+06		PIPES (IS)	IC/MS	[M ‒ H]‒	0.00510619	0.0114808	0.00989038	0.00452582	0.00371449	0.00259734	0.00253432	0.00376762		0.869128		0.998433
	104	N-Acetyl-D-glucosamine 1-phosphate	N-Acetyl-glucosamine-1P	C8H16NO9P	301.056	C04256	HMDB01367	IC/MS	[M ‒ H]‒	6.37 ±0.02	1.42969e+06	1.54829e+06	1.37927e+06	3.74927e+06	1.59367e+06	1.16278e+06	1.47872e+06	2.45253e+06		PIPES (IS)	IC/MS	[M ‒ H]‒	0.00519573	0.0059984	0.00675574	0.0173072	0.00446977	0.00348205	0.00360203	0.00689893		2.14961		1.32057
	105	Ketoleucine	Ketoleucine	C6H10O3	130.063	－	HMDB00695	IC/MS	[M ‒ H]‒	8.35 ±0.02	0	6.24441e+06	977988	0	9.23352e+06	1.66133e+07	2.88446e+07	1.69006e+07		PIPES (IS)	IC/MS	[M ‒ H]‒	0	0.0241922	0.00479024	0	0.0258972	0.04975	0.0702629	0.047541		0.198008		1.55728
	106	N-Acetyl-L-glutamate	N-Acetyl-Glu	C7H11NO5	189.064	C00624	HMDB01138	IC/MS	[M ‒ H]‒	7.25 ±0.01	5.19506e+06	3.18345e+07	4.18073e+06	6.09335e+06	7.87175e+06	5.86176e+06	5.03987e+06	8.87089e+06		PIPES (IS)	IC/MS	[M ‒ H]‒	0.0188797	0.123333	0.0204775	0.0281279	0.0220779	0.0175535	0.0122767	0.0249537		0.341779		0.939415
	107	Creatine phosphate	Creatine phosphate	C4H10N3O5P	211.036	C02305	HMDB01511	IC/MS	[M ‒ H]‒	6.02 ±0.01	1.39021e+08	4.18397e+08	1.16483e+08	3.91454e+07	8.27586e+07	3.13543e+08	2.84394e+08	5.8699e+08		PIPES (IS)	IC/MS	[M ‒ H]‒	0.505223	1.62096	0.570542	0.180701	0.232113	0.938932	0.69276	1.65119		0.35333		2.00159
	108	N-Carbamoyl-L-aspartate	N-Carbamoyl-Asp	C5H8N2O5	176.043	C00438	HMDB00828	IC/MS	[M ‒ H]‒	7.97 ±0.01	725085	541004	566838	288820	312391	175195	148059	221742		PIPES (IS)	IC/MS	[M ‒ H]‒	0.00263508	0.00209596	0.0027764	0.00133324	0.000876162	0.000524637	0.000360659	0.000623755		0.868656		0.702752
	109	2'-Deoxyuridine	Deoxyuridine	C9H12N2O5	228.075	C00526	HMDB00012	IC/MS	[M ‒ H]‒	5.14 ±0.03	585891	1.105e+06	530240	369827	570707	903687	949082	447537		PIPES (IS)	IC/MS	[M ‒ H]‒	0.00212922	0.00428098	0.00259715	0.00170718	0.00160066	0.00270617	0.00231188	0.00125891		0.67148		0.829101
	110	Maltotetraose	Maltotetraose	C24H42O21	666.222	C02052	HMDB01296	IC/MS	[M ‒ H]‒	3.12 ±0.03	2.5751e+06	937030	631460	805625	3.03007e+06	3.96642e+06	4.25135e+06	3.20581e+06		PIPES (IS)	IC/MS	[M ‒ H]‒	0.00935833	0.00363025	0.00309293	0.0037189	0.00849843	0.0118778	0.0103559	0.00901791		0.524447		0.950806
	111	Adenylosuccinic acid	Succinyl AMP	C14H18N5O11P	463.074	C03794	HMDB00536	IC/MS	[M ‒ H]‒	20.63 ±0.01	7.81451e+07	7.00154e+07	1.09609e+08	1.93961e+07	4.18316e+07	3.52832e+07	5.36535e+07	4.39366e+07		PIPES (IS)	IC/MS	[M ‒ H]‒	0.283992	0.271254	0.536873	0.0895354	0.117325	0.105659	0.130695	0.123593		1.12816		1.14039
	112	5-aminoimidazole-4-carboxamide-1-β-D-ribofuranosyl 5'-monophosphate	AICARP	C9H15N4O8P	338.063	－	－	IC/MS	[M ‒ H]‒	10.9 ±0.02	468238	107580	497371	1.10767e+06	558866	358320	451913	307551		PIPES (IS)	IC/MS	[M ‒ H]‒	0.00170165	0.000416786	0.00243615	0.00511319	0.00156745	0.00107302	0.00110082	0.000865135		3.56364		0.744548
	113	Alpha-D-Glucosamine 1-phosphate	Glucosamine 1P	C6H14NO8P	259.046	C06156	HMDB01109	IC/MS	[M ‒ H]‒	6.61 ±0.07	4.5562e+06	4.64689e+06	2.85637e+06	6.67465e+06	2.1835e+06	1.67767e+06	1.53777e+06	2.77935e+06		PIPES (IS)	IC/MS	[M ‒ H]‒	0.016558	0.018003	0.0139907	0.0308113	0.00612405	0.00502392	0.00374588	0.00781827		1.29632		1.03733
	114	2-Methylhippuric acid	2-Methylhippuric acid	C10H11NO3	193.074	－	HMDB11723	IC/MS	[M ‒ H]‒	8.02 ±0.02	636592	2.71943e+07	655427	375165	481791	3.78968e+06	726245	301795		PIPES (IS)	IC/MS	[M ‒ H]‒	0.00231348	0.105356	0.00321032	0.00173182	0.00135128	0.0113485	0.00176907	0.000848945		0.0459009		0.206146
	115	Ketoisoleucine	Ketoisoleucine	C6H10O3	130.063	－	－	IC/MS	[M ‒ H]‒	7.82 ±0.02	0	6.18578e+06	861527	0	7.87163e+06	1.6007e+07	2.6894e+07	1.49785e+07		PIPES (IS)	IC/MS	[M ‒ H]‒	0	0.023965	0.00421981	0	0.0220775	0.0479345	0.0655114	0.0421342		0.176082		1.53753
	116	Alpha-Ketovaline	2-Ketoisovaleric acid	C5H8O3	116.047	C00141	HMDB00019	IC/MS	[M ‒ H]‒	6.02 ±0.02	0	7.84115e+06	0	0	9.50437e+06	1.74099e+07	3.02455e+07	1.61606e+07		PIPES (IS)	IC/MS	[M ‒ H]‒	0	0.0303782	0	0	0.0266569	0.0521354	0.0736753	0.0454596		0		1.51201
	117	L-Cysteinesulfinic acid	Cysteinesulfinic acid	C3H7NO4S	153.01	C00606	HMDB00996	IC/MS	[M ‒ H]‒	7.74 ±0.02	1.3347e+06	817315	1.01607e+06	1.57975e+06	1.61603e+06	1.47215e+06	1.15739e+06	1.31056e+06		PIPES (IS)	IC/MS	[M ‒ H]‒	0.00485052	0.00316645	0.00497675	0.0072924	0.00453246	0.00440849	0.0028193	0.00368659		1.5304		0.727651
	118	L-Cysteic acid	Cysteic acid	C3H7NO5S	169.004	C00506	HMDB02757	IC/MS	[M ‒ H]‒	9.27 ±0.01	1.06174e+06	550956	583973	732038	494203	242782	280103	460443		PIPES (IS)	IC/MS	[M ‒ H]‒	0.00385854	0.00213452	0.00286033	0.00337921	0.00138609	0.000727032	0.000682306	0.00129522		1.04113		0.935831
	119	Pyrophosphate	Pyrophosphate	H4P2O7	177.943	C00013	HMDB00250	IC/MS	[M ‒ H]‒	12.71 ±0.03	2.00047e+08	1.55108e+08	1.52556e+08	2.13516e+08	2.43543e+08	3.01821e+08	3.754e+08	3.4054e+08		PIPES (IS)	IC/MS	[M ‒ H]‒	0.727004	0.600921	0.747228	0.985624	0.683064	0.903829	0.914441	0.957934		1.30493		1.1799
	120	N-Acetyl-D-glucosamine 6-phosphate	N-Acetyl-glucosamine-6P	C8H16NO9P	301.056	C00357	HMDB01062	IC/MS	[M ‒ H]‒	9.52 ±0.02	3.00129e+06	2.01382e+06	1.51751e+06	1.25281e+07	1.74131e+06	1.53005e+06	1.6539e+06	1.44643e+06		PIPES (IS)	IC/MS	[M ‒ H]‒	0.0109072	0.00780198	0.00743286	0.0578317	0.00488384	0.00458185	0.00402875	0.00406877		3.48838		0.85546
	121	Glycerophosphocholine	Glycerophosphocholine	C8H20NO6P	257.103	C00670	HMDB00086	IC/MS	[M + H]+	3.11 ±0.08	8.34931e+08	7.51124e+08	6.53439e+08	5.31174e+08	8.29645e+08	6.188e+08	6.9732e+08	8.48799e+08		PIPES (IS)	IC/MS	[M ‒ H]‒	3.03427	2.91001	3.20058	2.45199	2.3269	1.85305	1.69861	2.38766		0.950926		0.977587
	122	Dihydroxyacetone phosphate	DHAP	C3H7O6P	169.998	C00111	HMDB01473	PFPP-LC/MS	[M ‒ H]‒	1.31 ±0.02	196111	1.4491e+06	379091	499744	167269	673467	263396	776853		PIPES (IS)	PFPP-LC/MS	[M ‒ H]‒	0.0177117	0.106362	0.0347653	0.0321754	0.0130499	0.0355862	0.0207625	0.0503598		0.539522		1.46234
	123	Lactic acid	Lac	C3H6O3	90.0317	C00186	HMDB00190	PFPP-LC/MS	[M ‒ H]‒	2.42 ±0.01	1.18843e+08	1.36595e+08	1.04231e+08	2.69574e+08	3.11947e+08	5.53407e+08	3.51461e+08	3.84607e+08		PIPES (IS)	PFPP-LC/MS	[M ‒ H]‒	10.7333	10.0259	9.5587	17.3562	24.3372	29.2422	27.7042	24.9323		1.29653		0.982402
	124	Sebacic acid	Sebacic acid	C10H18O4	202.121	C08277	HMDB00792	PFPP-LC/MS	[M ‒ H]‒	16.09 ±0.02	2.09125e+06	2.0292e+06	2.13399e+06	2.03707e+06	2.02863e+06	1.95626e+06	1.84859e+06	1.7937e+06		PIPES (IS)	PFPP-LC/MS	[M ‒ H]‒	0.188871	0.148941	0.195702	0.131154	0.158268	0.10337	0.145717	0.116277		0.967572		1.00136
	125	L-Threonic acid	Threonic acid	C4H8O5	136.037	－	HMDB00943	PFPP-LC/MS	[M ‒ H]‒	1.66 ±0.01	906729	686466	532430	587368	147464	164931	64380.5	187236		PIPES (IS)	PFPP-LC/MS	[M ‒ H]‒	0.0818911	0.0503858	0.0488276	0.037817	0.0115047	0.00871501	0.00507485	0.0121377		0.655025		0.851275
	126	DL-2-Hydroxybutyric acid	2-Hydroxybutyric acid	C4H8O3	104.047	C05984	HMDB00008	PFPP-LC/MS	[M ‒ H]‒	3.84 ±0.01	0	0	1.26746e+06	1.98899e+06	0	0	1.27096e+06	1.85802e+06		PIPES (IS)	PFPP-LC/MS	[M ‒ H]‒	0	0	0.116235	0.128059	0	0	0.100185	0.120447		#DIV/0!		#DIV/0!
	127	Oxidized glutathione	GSSG	C20H32N6O12S2	612.152	C00127	HMDB03337	PFPP-LC/MS	[M ‒ H]‒	6.63 ±0.03	1.03369e+06	1.10805e+06	1.40792e+06	2.03787e+06	365496	320661	255938	366509		PIPES (IS)	PFPP-LC/MS	[M ‒ H]‒	0.0933574	0.0813298	0.129116	0.131206	0.028515	0.0169438	0.0201746	0.0237591		1.49022		0.966451
	128	Acetylcholine	Acetylcholine	C7H15NO2	145.11	C01996	HMDB00895	PFPP-LC/MS	[M ‒ H]‒	12.57 ±0.08	197242	257722	235754	542861	183528	239235	127794	247376		PIPES (IS)	PFPP-LC/MS	[M ‒ H]‒	0.0178139	0.0189165	0.0216203	0.0349514	0.0143183	0.0126413	0.0100735	0.0160363		1.54019		0.968477
	129	3-Cyano-L-alanine	3-Cyano-L-alanine	C4H6N2O2	114.043	C02512	HMDB60245	PFPP-LC/MS	[M ‒ H]‒	1.67 ±0.01	57030.2	50315.1	46340	147815	30428.4	66811.8	37334.6	97868.8		PIPES (IS)	PFPP-LC/MS	[M ‒ H]‒	0.00515067	0.00369307	0.00424971	0.00951688	0.00237394	0.00353036	0.00294294	0.00634438		1.55665		1.57298
	130	2-Aminobutanoic acid	2-Aminobutanoic acid	C4H9NO2	103.063	C02356	HMDB00452	PFPP-LC/MS	[M + H]+	2.18 ±0.01	755051	906578	1.92377e+06	2.64834e+06	820230	1.43069e+06	2.25067e+06	3.2773e+06		PIPES (IS)	PFPP-LC/MS	[M + H]+	0.134304	0.100923	0.255343	0.294658	0.09126	0.139029	0.301608	0.352803		2.33817		2.8417
	131	Amino adipic acid	Amino adipic acid	C6H11NO4	161.069	C00956	HMDB00510	PFPP-LC/MS	[M + H]+	2.3 ±0.01	435479	542667	690459	611027	818578	879364	984421	846609		PIPES (IS)	PFPP-LC/MS	[M + H]+	0.0774604	0.0604111	0.0916452	0.0679838	0.0910761	0.0854534	0.13192	0.091138		1.15781		1.26358
	132	Adenosine	Adenosine	C10H13N5O4	267.097	C00212	HMDB00050	PFPP-LC/MS	[M + H]+	10.52 ±0.03	6.76366e+06	2.60549e+07	1.70227e+07	448273	1.3825e+06	1.39506e+06	1.2189e+06	1.19498e+06		PIPES (IS)	PFPP-LC/MS	[M + H]+	1.20308	2.9005	2.25943	0.0498754	0.153819	0.135567	0.163342	0.128641		0.562754		1.00897
	133	Betaine	Betaine	C5H11NO2	117.079	C00719	HMDB00043	PFPP-LC/MS	[M + H]+	1.93 ±0.01	1.73655e+07	1.72857e+07	2.01145e+07	2.95178e+07	1.60181e+07	1.63423e+07	1.37698e+07	2.95728e+07		PIPES (IS)	PFPP-LC/MS	[M + H]+	3.08887	1.92429	2.66982	3.2842	1.78219	1.58809	1.84527	3.18353		1.18768		1.4921
	134	Carnitine	Carnitine	C7H15NO3	161.105	C00487	HMDB00062	PFPP-LC/MS	[M + H]+	3.41 ±0.01	2.52692e+08	2.68228e+08	2.6696e+08	2.61551e+08	8.66959e+07	1.18697e+08	7.95537e+07	9.87652e+07		PIPES (IS)	PFPP-LC/MS	[M + H]+	44.9474	29.8598	35.4338	29.1005	9.64591	11.5345	10.6609	10.6321		0.862676		1.00531
	135	Carnosine	Carnosine	C9H14N4O3	226.107	C00386	HMDB00033	PFPP-LC/MS	[M + H]+	3.11 ±0.03	1.92288e+06	3.09326e+06	2.73659e+06	3.20843e+06	4.65685e+07	1.30787e+08	1.04081e+08	7.69604e+07		PIPES (IS)	PFPP-LC/MS	[M + H]+	0.34203	0.34435	0.363229	0.356975	5.18128	12.7094	13.9477	8.28483		1.04928		1.24269
	136	Choline	Choline	C5H13NO	103.1	C00114	HMDB00097	PFPP-LC/MS	[M + H]+	3.05 ±0.01	5.75782e+07	3.67998e+07	5.35024e+07	1.29466e+08	5.74074e+07	5.70276e+07	6.70746e+07	6.01767e+07		PIPES (IS)	PFPP-LC/MS	[M + H]+	10.2417	4.09666	7.10141	14.4046	6.38723	5.54173	8.98855	6.47806		1.49989		1.29656
	137	Creatine	Creatine	C4H9N3O2	131.069	C00300	HMDB00064	PFPP-LC/MS	[M + H]+	2.55 ±0.01	2.05327e+09	2.42175e+09	2.19161e+09	2.67055e+09	2.41656e+09	3.71161e+09	2.79978e+09	3.35067e+09		PIPES (IS)	PFPP-LC/MS	[M + H]+	365.223	269.596	290.894	297.129	268.87	360.68	375.194	360.702		0.926284		1.16892
	138	Creatinine	Creatinine	C4H7N3O	113.059	C00791	HMDB00562	PFPP-LC/MS	[M + H]+	3.27 ±0.01	5.98876e+06	2.68826e+07	6.66778e+06	1.07581e+07	8.80178e+06	2.11186e+07	1.22082e+07	1.53189e+07		PIPES (IS)	PFPP-LC/MS	[M + H]+	1.06525	2.99264	0.885021	1.19697	0.979299	2.05223	1.63599	1.64909		0.513071		1.08364
	139	Cytidine	Cytidine	C9H13N3O5	243.086	C00475	HMDB00089	PFPP-LC/MS	[M + H]+	4.61 ±0.02	670233	407906	721629	5.15019e+06	420605	466433	641674	460304		PIPES (IS)	PFPP-LC/MS	[M + H]+	0.119217	0.0454091	0.0957825	0.573018	0.0467972	0.0453263	0.0859896	0.049552		4.06254		1.47131
	140	Gamma-Aminobutyric acid	GABA	C4H9NO2	103.063	C00334	HMDB00112	PFPP-LC/MS	[M + H]+	2.68 ±0.01	527257	468082	824138	5.28108e+06	271034	320952	278404	580451		PIPES (IS)	PFPP-LC/MS	[M + H]+	0.0937853	0.0521082	0.109389	0.58758	0.0301556	0.031189	0.0373085	0.0624859		4.77725		1.62678
	141	Glycine	Gly	C2H5NO2	75.032	C00037	HMDB00123	PFPP-LC/MS	[M + H]+	1.71 ±0.01	9.00498e+06	1.08259e+07	9.36378e+06	1.17634e+07	2.20264e+07	3.44704e+07	1.72712e+07	1.39198e+07		PIPES (IS)	PFPP-LC/MS	[M + H]+	1.60175	1.20517	1.24286	1.30881	2.45069	3.34971	2.31448	1.49848		0.909064		0.657362
	142	Guanosine	Guanosine	C10H13N5O5	283.092	C00387	HMDB00133	PFPP-LC/MS	[M + H]+	8.08 ±0.04	130149	0	0	1.36228e+06	0	0	0	0		PIPES (IS)	PFPP-LC/MS	[M + H]+	0.0231502	0	0	0.15157	0	0	0	0		6.54724		#DIV/0!
	143	4-Hydroxy-L-proline	4-Hydroxy-Pro	C5H9NO3	131.058	C01157	HMDB06055	PFPP-LC/MS	[M + H]+	1.71 ±0.01	6.34126e+06	6.05786e+06	4.23962e+06	2.90185e+06	2.10035e+07	2.71865e+07	1.79901e+07	1.165e+07		PIPES (IS)	PFPP-LC/MS	[M + H]+	1.12795	0.674377	0.562728	0.322864	2.33688	2.64188	2.41083	1.25413		0.491362		0.736118
	144	Hypoxanthine	Hypoxanthine	C5H4N4O	136.039	C00262	HMDB00157	PFPP-LC/MS	[M + H]+	3.59 ±0.01	7.11217e+06	4.40858e+06	5.14084e+06	1.2327e+08	5.80785e+06	4.00153e+06	3.62407e+06	4.92678e+06		PIPES (IS)	PFPP-LC/MS	[M + H]+	1.26507	0.490774	0.682349	13.7152	0.646189	0.388854	0.485655	0.530371		8.19976		0.981626
	145	L-Alanine	Ala	C3H7NO2	89.0477	C00041	HMDB00161	PFPP-LC/MS	[M + H]+	1.86 ±0.01	4.11972e+07	6.01588e+07	7.13633e+07	8.06987e+07	4.0523e+07	9.77775e+07	6.54713e+07	5.97691e+07		PIPES (IS)	PFPP-LC/MS	[M + H]+	7.32791	6.69703	9.47212	8.97865	4.50865	9.50166	8.77369	6.43418		1.31557		1.08548
	146	L-Arginine	Arg	C6H14N4O2	174.112	C00062	HMDB00517	PFPP-LC/MS	[M + H]+	2.37 ±0.01	1.78189e+07	2.05092e+07	1.44263e+07	3.48024e+07	2.14362e+07	2.82178e+07	1.60129e+07	2.10849e+07		PIPES (IS)	PFPP-LC/MS	[M + H]+	3.16952	2.28314	1.91482	3.87217	2.38503	2.7421	2.14586	2.2698		1.06131		0.861234
	147	L-Asparagine	Asn	C4H8N2O3	132.053	C00152	HMDB00168	PFPP-LC/MS	[M + H]+	1.67 ±0.01	6.1362e+06	6.32224e+06	6.32005e+06	1.67678e+07	3.98205e+06	6.25988e+06	4.80547e+06	9.15588e+06		PIPES (IS)	PFPP-LC/MS	[M + H]+	1.09147	0.703809	0.838865	1.86561	0.443048	0.608312	0.643973	0.985636		1.50644		1.55
	148	L-Asparate	Asp	C4H7NO4	133.038	C00049	HMDB00191	PFPP-LC/MS	[M + H]+	1.68 ±0.01	7.16488e+07	5.51418e+07	1.17852e+08	3.46814e+07	7.3377e+06	1.46899e+07	1.36208e+07	8.36941e+06		PIPES (IS)	PFPP-LC/MS	[M + H]+	12.7445	6.13853	15.6425	3.8587	0.816403	1.42751	1.8253	0.900972		1.03274		1.21497
	149	L-Citrulline	Citrulline	C6H13N3O3	175.096	C00327	HMDB00904	PFPP-LC/MS	[M + H]+	1.89 ±0.01	1.17863e+07	1.24641e+07	1.21305e+07	1.81943e+07	8.80448e+06	1.3157e+07	8.21289e+06	1.55435e+07		PIPES (IS)	PFPP-LC/MS	[M + H]+	2.09648	1.38754	1.6101	2.02433	0.979599	1.27855	1.10059	1.67326		1.04317		1.22838
	150	L-Cysteine	Cys	C3H7NO2S	121.02	C00097	HMDB00574	PFPP-LC/MS	[M + H]+	1.81 ±0.01	82767.3	203550	76006.2	539293	351170	468689	317739	450030		PIPES (IS)	PFPP-LC/MS	[M + H]+	0.0147222	0.0226597	0.0100884	0.0600025	0.0390717	0.0455455	0.0425797	0.048446		1.875		1.07574
	151	L-Glutamic acid	Glu	C5H9NO4	147.053	C00025	HMDB00148	PFPP-LC/MS	[M + H]+	1.86 ±0.01	3.1145e+08	3.54121e+08	3.66382e+08	4.97996e+08	1.23393e+08	1.228e+08	1.03777e+08	1.49967e+08		PIPES (IS)	PFPP-LC/MS	[M + H]+	55.3989	39.4217	48.6302	55.4077	13.7289	11.9332	13.907	16.1441		1.09721		1.17103
	152	L-Glutamine	Gln	C5H10N2O3	146.069	C00064	HMDB00641	PFPP-LC/MS	[M + H]+	1.74 ±0.01	2.56149e+08	3.00605e+08	2.2058e+08	4.39334e+08	1.78029e+08	2.80985e+08	1.398e+08	3.08442e+08		PIPES (IS)	PFPP-LC/MS	[M + H]+	45.5622	33.4642	29.2777	48.881	19.8078	27.3051	18.7343	33.2039		0.989021		1.10242
	153	L-Histidine	His	C6H9N3O2	155.069	C00135	HMDB00177	PFPP-LC/MS	[M + H]+	2.16 ±0.01	1.60336e+07	2.16412e+07	1.39068e+07	3.09758e+07	1.37787e+07	2.14249e+07	1.21482e+07	2.1989e+07		PIPES (IS)	PFPP-LC/MS	[M + H]+	2.85196	2.40915	1.84587	3.44641	1.53304	2.08199	1.62795	2.36713		1.00592		1.10513
	154	L-Homoserine	HomoSer	C4H9NO3	119.058	C00263	HMDB00719	PFPP-LC/MS	[M + H]+	1.79 ±0.01	1.67819e+07	1.87693e+07	1.86286e+07	3.37745e+07	1.5471e+07	2.6437e+07	1.66487e+07	2.21214e+07		PIPES (IS)	PFPP-LC/MS	[M + H]+	2.98506	2.08945	2.47259	3.7578	1.72133	2.56905	2.23106	2.38139		1.22778		1.07507
	155	L-Isoleucine	Ile	C6H13NO2	131.095	C00407	HMDB00172	PFPP-LC/MS	[M + H]+	7.03 ±0.02	1.55565e+07	2.21028e+07	2.35509e+07	5.69657e+07	1.79316e+07	2.89257e+07	2.8012e+07	3.12112e+07		PIPES (IS)	PFPP-LC/MS	[M + H]+	2.76711	2.46054	3.12594	6.33809	1.99509	2.81089	3.75384	3.3599		1.81038		1.48018
	156	L-Leucine	Leu	C6H13NO2	131.095	C00123	HMDB00687	PFPP-LC/MS	[M + H]+	7.94 ±0.01	2.50927e+07	3.43802e+07	3.67034e+07	1.03236e+08	2.86237e+07	4.13744e+07	4.45107e+07	5.00211e+07		PIPES (IS)	PFPP-LC/MS	[M + H]+	4.46334	3.8273	4.87167	11.4862	3.18471	4.02061	5.9648	5.3848		1.97306		1.57517
	157	L-Lysine	Lys	C6H14N2O2	146.106	C00047	HMDB00182	PFPP-LC/MS	[M + H]+	2.13 ±0.01	2.96224e+07	3.41153e+07	2.61311e+07	5.15382e+07	3.55412e+07	5.57732e+07	2.86098e+07	3.79292e+07		PIPES (IS)	PFPP-LC/MS	[M + H]+	5.26906	3.7978	3.4684	5.73421	3.95437	5.41983	3.83395	4.0831		1.01497		0.844558
	158	L-Methionine	Met	C5H11NO2S	149.051	C00073	HMDB00696	PFPP-LC/MS	[M + H]+	3.64 ±0.01	6.32825e+06	7.69316e+06	6.17805e+06	1.79253e+07	7.73304e+06	9.99287e+06	7.31211e+06	9.74274e+06		PIPES (IS)	PFPP-LC/MS	[M + H]+	1.12563	0.856423	0.820018	1.99439	0.860389	0.971071	0.979882	1.04881		1.41994		1.10769
	159	L-Ornithine	Orn	C5H12N2O2	132.09	C00077	HMDB00214	PFPP-LC/MS	[M + H]+	2.06 ±0.01	786815	1.25761e+06	849503	1.05795e+06	1.1046e+06	1.43183e+06	796012	792494		PIPES (IS)	PFPP-LC/MS	[M + H]+	0.139954	0.14	0.112755	0.117709	0.1229	0.13914	0.106672	0.0853125		0.823221		0.732654
	160	L-Phenylalanine	Phe	C9H11NO2	165.079	C00079	HMDB00159	PFPP-LC/MS	[M + H]+	12.3 ±0.07	1.34147e+07	1.64933e+07	1.70235e+07	5.07272e+07	1.55711e+07	2.29621e+07	1.82266e+07	2.72962e+07		PIPES (IS)	PFPP-LC/MS	[M + H]+	2.38612	1.83608	2.25954	5.64398	1.73246	2.23137	2.44252	2.93845		1.8719		1.35752
	161	L-Proline	Pro	C5H9NO2	115.063	C00148	HMDB00162	PFPP-LC/MS	[M + H]+	2.09 ±0.01	1.56287e+07	1.96329e+07	1.80052e+07	4.83029e+07	2.59055e+07	3.69535e+07	3.79074e+07	3.88372e+07		PIPES (IS)	PFPP-LC/MS	[M + H]+	2.77994	2.18559	2.38984	5.37425	2.88228	3.59101	5.0799	4.18085		1.5636		1.43061
	162	L-Serine	Ser	C3H7NO3	105.043	C00065	HMDB00187	PFPP-LC/MS	[M + H]+	1.67 ±0.01	1.32871e+07	1.39344e+07	8.76089e+06	2.74393e+07	9.1499e+06	1.65776e+07	9.01347e+06	1.75172e+07		PIPES (IS)	PFPP-LC/MS	[M + H]+	2.36344	1.55121	1.16284	3.05294	1.01803	1.61095	1.20788	1.88574		1.07692		1.17674
	163	L-Tryptophan	Trp	C11H12N2O2	204.09	C00078	HMDB00929	PFPP-LC/MS	[M + H]+	14.64 ±0.04	3.69153e+06	4.13327e+06	5.39956e+06	1.3591e+07	4.63257e+06	4.81119e+06	5.3557e+06	9.1315e+06		PIPES (IS)	PFPP-LC/MS	[M + H]+	0.656628	0.460126	0.716688	1.51216	0.515426	0.467534	0.717708	0.983011		1.99582		1.7302
	164	L-Tyrosine	Tyr	C9H11NO3	181.074	C00082	HMDB00158	PFPP-LC/MS	[M + H]+	7.65 ±0.02	7.16255e+06	8.72746e+06	7.20396e+06	2.47077e+07	8.27856e+06	1.22775e+07	7.64639e+06	1.60222e+07		PIPES (IS)	PFPP-LC/MS	[M + H]+	1.27403	0.971564	0.956187	2.74901	0.921084	1.19308	1.02468	1.7248		1.64999		1.3005
	165	L-Valine	Val	C5H11NO2	117.079	C00183	HMDB00883	PFPP-LC/MS	[M + H]+	3.22 ±0.01	2.35679e+07	3.29864e+07	3.51008e+07	7.69943e+07	2.62974e+07	4.20169e+07	4.23071e+07	5.58415e+07		PIPES (IS)	PFPP-LC/MS	[M + H]+	4.19212	3.67213	4.65896	8.5665	2.92589	4.08305	5.6695	6.01137		1.68172		1.66657
	166	Dimethylglycine	DMG	C4H9NO2	103.063	C01026	HMDB00092	PFPP-LC/MS	[M + H]+	1.85 ±0.01	1.18394e+06	1.56551e+06	1.35946e+06	1.28944e+06	1.08532e+06	1.57306e+06	1.20381e+06	1.14866e+06		PIPES (IS)	PFPP-LC/MS	[M + H]+	0.210593	0.174276	0.180442	0.143465	0.120754	0.152864	0.16132	0.123654		0.841602		1.0415
	167	Reduced glutathione	GSH	C10H17N3O6S	307.084	C00051	HMDB00125	PFPP-LC/MS	[M + H]+	3.24 ±0.01	3.53142e+07	5.73003e+07	4.28097e+07	4.54861e+07	3.91355e+07	7.10189e+07	5.2082e+07	5.6902e+07		PIPES (IS)	PFPP-LC/MS	[M + H]+	6.28148	6.37882	5.68217	5.06085	4.35427	6.90136	6.97942	6.12554		0.848561		1.1643
	168	5-Hydroxy-L-lysine	5-Hydroxy-Lys	C6H14N2O3	162.1	C16741	HMDB00450	PFPP-LC/MS	[M + H]+	2.07 ±0.01	83597.9	141592	116130	136204	104076	129545	96750	105598		PIPES (IS)	PFPP-LC/MS	[M + H]+	0.0148699	0.0157624	0.015414	0.0151543	0.0115796	0.0125887	0.0129653	0.0113677		0.997908		1.00681
	169	Histamine	Histamine	C5H9N3	111.08	C00388	HMDB00870	PFPP-LC/MS	[M + H]+	3.33 ±0.01	4.54454e+06	5.41961e+06	5.21393e+06	6.48365e+06	2.63026e+06	3.9612e+06	3.0579e+06	3.78626e+06		PIPES (IS)	PFPP-LC/MS	[M + H]+	0.808357	0.603325	0.692049	0.72138	0.292646	0.384935	0.409784	0.407593		1.00124		1.20632
	170	Xanthine	Xanthine	C5H4N4O2	152.033	C00385	HMDB00292	PFPP-LC/MS	[M + H]+	3.59 ±0.02	841669	499364	692563	9.44978e+06	804524	222975	382562	513393		PIPES (IS)	PFPP-LC/MS	[M + H]+	0.149711	0.0555906	0.0919244	1.0514	0.0895125	0.0216679	0.0512665	0.0552671		5.56898		0.958205
	171	Trigonelline	Trigonelline	C7H7NO2	137.048	C01004	HMDB00875	PFPP-LC/MS	[M + H]+	2.36 ±0.01	1.00589e+06	1.79973e+06	710335	871003	812129	934407	717409	957646		PIPES (IS)	PFPP-LC/MS	[M + H]+	0.178922	0.200351	0.0942833	0.096909	0.0903586	0.0908023	0.0961387	0.103091		0.504102		1.09974
	172	Phosphocholine	Phosphocholine	C5H14NO4P	183.066	C00588	HMDB01565	PFPP-LC/MS	[M + H]+	1.62 ±0.01	1.72865e+06	1.68509e+06	1.76054e+06	7.36485e+06	1.9996e+06	2.53344e+06	1.5894e+06	2.12949e+06		PIPES (IS)	PFPP-LC/MS	[M + H]+	0.307483	0.187588	0.233678	0.819424	0.222479	0.246191	0.212992	0.229241		2.12718		0.943593
	173	Hypotaurine	Hypotaurine	C2H7NO2S	109.02	C00519	HMDB00965	PFPP-LC/MS	[M + H]+	1.58 ±0.01	8.04137e+06	1.16563e+07	1.02703e+07	3.00757e+07	4.70423e+06	7.237e+06	3.64233e+06	1.42725e+07		PIPES (IS)	PFPP-LC/MS	[M + H]+	1.43035	1.29761	1.36318	3.34627	0.5234	0.703265	0.488103	1.53644		1.72636		1.65045
	174	Inosine	Inosine	C10H12N4O5	268.081	C00294	HMDB00195	PFPP-LC/MS	[M + H]+	6.69 ±0.02	6.52232e+06	5.07036e+06	5.00983e+06	5.73904e+07	3.30498e+06	3.01112e+06	2.3209e+06	2.13544e+06		PIPES (IS)	PFPP-LC/MS	[M + H]+	1.16015	0.564445	0.664959	6.38533	0.367717	0.292609	0.31102	0.229881		4.08808		0.819142
	175	DL-methionine sulfoxide	MSO	C5H11NO3S	165.046	－	HMDB02005	PFPP-LC/MS	[M + H]+	1.84 ±0.01	489843	55773.3	62291.1	336321	106771	256985	76514.9	350263		PIPES (IS)	PFPP-LC/MS	[M + H]+	0.0871305	0.00620883	0.00826795	0.0374196	0.0118795	0.0249728	0.0102536	0.037706		0.489478		1.3014
	176	Pyridoxamine 5'-phosphate	Pyridoxamine 5-phosphate	C8H13N2O5P	248.056	C00647	HMDB01555	PFPP-LC/MS	[M + H]+	2.11 ±0.01	470632	582173	738349	880792	280850	327880	176637	327384		PIPES (IS)	PFPP-LC/MS	[M + H]+	0.0837132	0.064809	0.0980017	0.0979982	0.0312477	0.0318622	0.0236708	0.035243		1.31967		0.933511
	177	N6,N6,N6-Trimethyl-L-lysine	Trimethyl-Lys	C9H20N2O2	188.152	C03793	HMDB01325	PFPP-LC/MS	[M + H]+	2.84 ±0.01	339786	930940	494213	729660	696452	1.40003e+06	759049	924095		PIPES (IS)	PFPP-LC/MS	[M + H]+	0.0604391	0.103635	0.0655973	0.081183	0.0774882	0.13605	0.101719	0.0994794		0.894599		0.942211
	178	L-Argininosuccinate	Argininosuccinate	C10H18N4O6	290.123	C03406	HMDB00052	PFPP-LC/MS	[M + H]+	2.23 ±0.01	350923	192650	238794	954159	26866.7	120943	48162.7	30432.2		PIPES (IS)	PFPP-LC/MS	[M + H]+	0.0624201	0.0214463	0.0316953	0.106161	0.00298923	0.0117528	0.00645419	0.00327604		1.64376		0.660035
	179	Urocanic acid	Urocanic acid	C6H6N2O2	138.043	C00785	HMDB00301	PFPP-LC/MS	[M + H]+	6.8 ±0.02	0	3.24393e+06	1.04811e+06	1.41799e+06	0	0	1.32182e+06	0		PIPES (IS)	PFPP-LC/MS	[M + H]+	0	0.361123	0.139117	0.157768	0	0	0.177135	0		0.822116		#DIV/0!
	180	1-Methylhistidine	1-Methyl-His	C7H11N3O2	169.085	C01152	HMDB00001	PFPP-LC/MS	[M + H]+	2.45 ±0.01	1.04298e+06	1.41398e+06	1.0715e+06	645009	1.14178e+06	1.84036e+06	1.05241e+06	838034		PIPES (IS)	PFPP-LC/MS	[M + H]+	0.185518	0.157408	0.142221	0.0717646	0.127036	0.17884	0.141032	0.0902149		0.624		0.756015
	181	Xanthosine	Xanthosine	C10H12N4O6	284.076	C01762	HMDB00299	PFPP-LC/MS	[M + H]+	10.36 ±0.04	0	0	0	0	0	0	0	0		PIPES (IS)	PFPP-LC/MS	[M + H]+	0	0	0	0	0	0	0	0		#DIV/0!		#DIV/0!
	182	O-Acetylcarnitine	Acetylcarnitine	C9H17NO4	203.116	C02571	HMDB00201	PFPP-LC/MS	[M + H]+	12.57 ±0.08	8.88338e+07	8.99948e+07	9.59817e+07	1.7771e+08	7.69164e+07	9.21466e+07	6.69533e+07	1.04737e+08		PIPES (IS)	PFPP-LC/MS	[M + H]+	15.8012	10.0185	12.7397	19.7722	8.55783	8.95447	8.97229	11.275		1.25919		1.15617
	183	L-Homocitrulline	Homocitrulline	C7H15N3O3	189.111	C02427	HMDB00679	PFPP-LC/MS	[M + H]+	2.3 ±0.01	105965	50368.5	154991	161986	166474	225206	181134	174198		PIPES (IS)	PFPP-LC/MS	[M + H]+	0.0188484	0.00560715	0.020572	0.0180227	0.0185221	0.0218847	0.0242734	0.0187525		1.57816		1.06482
	184	L-Saccharopine	Saccharopine	C11H20N2O6	276.132	C00449	HMDB00279	PFPP-LC/MS	[M + H]+	1.91 ±0.01	0	0	0	0	0	0	0	0		PIPES (IS)	PFPP-LC/MS	[M + H]+	0	0	0	0	0	0	0	0		#DIV/0!		#DIV/0!
	185	L-Anserine (beta-alanyl-N-methylhistidine) (nitrate salt)	L-Anserine	C10H16N4O3	240.122	－	HMDB00194	PFPP-LC/MS	[M + H]+	3.59 ±0.01	3.82995e+06	6.0788e+06	4.73134e+06	5.77777e+06	4.72587e+07	1.07574e+08	7.62124e+07	6.62149e+07		PIPES (IS)	PFPP-LC/MS	[M + H]+	0.68125	0.676708	0.627995	0.642843	5.25807	10.4536	10.2131	7.12808		0.935845		1.10371
	186	N2-Acetyl- L-lysine	N-Acetyl-Lys	C8H16N2O3	188.116	C12989	HMDB00446	PFPP-LC/MS	[M + H]+	3.68 ±0	0	0	0	0	0	0	0	0		PIPES (IS)	PFPP-LC/MS	[M + H]+	0	0	0	0	0	0	0	0		#DIV/0!		#DIV/0!
	187	Pipecolic acid	Pipecolic acid	C6H11NO2	129.079	C00408	HMDB00070	PFPP-LC/MS	[M + H]+	3.29 ±0.01	1.70926e+06	2.48033e+06	2.36126e+06	1.56066e+06	1.745e+06	2.26727e+06	2.0858e+06	1.70927e+06		PIPES (IS)	PFPP-LC/MS	[M + H]+	0.304034	0.276117	0.313412	0.173641	0.194151	0.220325	0.279514	0.184004		0.839529		1.11832
	188	Glycylglycine	Gly-Gly	C4H8N2O3	132.053	C02037	HMDB11733	PFPP-LC/MS	[M + H]+	2.11 ±0.01	116046	148770	112619	389014	221708	230293	165579	348954		PIPES (IS)	PFPP-LC/MS	[M + H]+	0.0206416	0.0165615	0.014948	0.0432823	0.0246675	0.022379	0.0221889	0.0375651		1.5652		1.2701
	189	Niacinamide	Niacinamide	C6H6N2O	122.048	C00153	HMDB01406	PFPP-LC/MS	[M + H]+	4.04 ±0.01	6.86855e+07	4.67085e+07	5.21463e+07	1.43008e+08	5.22818e+07	7.20519e+07	4.87578e+07	6.66937e+07		PIPES (IS)	PFPP-LC/MS	[M + H]+	12.2174	5.19972	6.92142	15.9113	5.81695	7.00174	6.53395	7.17962		1.31094		1.06981
	190	O-Phosphoethanolamine	O-Phosphoethanolamine	C2H8NO4P	141.019	C00346	HMDB00224	PFPP-LC/MS	[M + H]+	1.51 ±0	4.57405e+06	5.48581e+06	4.14554e+06	8.40215e+06	1.87273e+06	2.26904e+06	1.71293e+06	2.43538e+06		PIPES (IS)	PFPP-LC/MS	[M + H]+	0.813604	0.610694	0.550242	0.934835	0.208362	0.220497	0.229547	0.26217		1.04267		1.14657
		Piperazine-1,4-bis(2-ethanesulfonic acid) (IS)	PIPES (IS)	C8H18N2O6S2	302.061	－	－	IC/MS	[M ‒ H]‒	8.07 ±0.01	3.42247e+07	2.99093e+07	3.52004e+07	2.47861e+07	3.66062e+07	2.69086e+07	3.18236e+07	2.81691e+07
		Piperazine-1,4-bis(2-ethanesulfonic acid) (IS)	PIPES (IS)	C8H18N2O6S2	302.061	－	－	PFPP-LC/MS	[M + H]+	1.43 ±0.01	699248	1.04089e+06	1.29897e+06	1.02836e+06	820005	829216	578467	736078
		Piperazine-1,4-bis(2-ethanesulfonic acid) (IS)	PIPES (IS)	C8H18N2O6S2	302.061	－	－	PFPP-LC/MS	[M ‒ H]‒	1.44 ±0.01	1.37716e+06	1.5787e+06	1.88005e+06	1.7771e+06	1.31599e+06	1.52498e+06	983425	1.22235e+06

## Sheet: Supplementary Table S5
	Supplementary Table S5. Quantitaive metabolic profile data of 257 lipids during the 2-week ad libitum feeding
		Lipid	Molecular formula	Exact mass	Method	Precursor ion	Product ion(s)	MRM transition(s)			RT (min)	Peak area										Relative peak area (Analyte/IS/sample amount, mg)									SOL (CANA/Vehicle)		EDL (CANA/Vehicle)
								1	2	3		Vehicle-treated mice SOL		CANA-treated mice SOL		Vehicle-treated mice EDL		CANA-treated mice EDL			IS	Vehicle-treated mice SOL		CANA-treated mice SOL		Vehicle-treated mice EDL		CANA-treated mice EDL			Fold change		Fold change
												1	2	1	2	1	2	1	2			1	2	1	2	1	2	1	2
												Sample amount (mg)
												8.04	8.63	5.8	8.74	9.74	12.41	12.9	12.62
	1	Cer(d18:1)(16:0)	C34H67O3N1	537.512	DEA-SFC/MS/MS	[M + H]+	[C18H34N]+	538.5 > 264.25			5.53603	1.06189e+06	1.12135e+06	805879	5.69127e+06	1.35887e+06	1.05694e+06	1247287	1.85816e+06		Cer d18:1_17:0 (IS)	0.0206108	0.0198691	0.0204528	0.0909107	0.0205112	0.0126411	0.0133347	0.0218949		2.75108		1.06266
	2	Cer(d18:1)(18:0)	C36H71O3N1	565.543	DEA-SFC/MS/MS	[M + H]+	[C18H34N]+	566.55 > 264.25			5.5508	2.27967e+06	3.47937e+06	1.94335e+06	9.5252e+06	1.78e+07	2.96992e+07	2.81272e+07	3.41495e+07		Cer d18:1_17:0 (IS)	0.0442475	0.0616506	0.0493213	0.152153	0.268679	0.355206	0.300707	0.402388		1.90253		1.12696
	3	Cer(d18:1)(18:1)	C36H69O3N1	563.528	DEA-SFC/MS/MS	[M + H]+	[C18H34N]+	564.55 > 264.25			5.5623	43490.6	60231.8	32239.3	130133	213079	309098	369003	399899		Cer d18:1_17:0 (IS)	0.000844136	0.00106724	0.000818215	0.00207871	0.00321628	0.00369686	0.003945	0.00471205		1.51563		1.25226
	4	Cer(d18:1)(18:2)	C36H67O3N1	561.512	DEA-SFC/MS/MS	[M + H]+	[C18H34N]+	562.5 > 264.25			5.55257	260558	383088	174598	720080	1.54292e+06	2.29329e+06	1.89798e+06	2.14898e+06		Cer d18:1_17:0 (IS)	0.00505734	0.00678788	0.00443121	0.0115024	0.0232893	0.0274281	0.0202912	0.0253217		1.34515		0.899353
	5	Cer(d18:1)(20:0)	C38H75O3N1	593.575	DEA-SFC/MS/MS	[M + H]+	[C18H34N]+	594.6 > 264.25			5.55917	238347	269834	183063	763039	486301	561173	476222	711019		Cer d18:1_17:0 (IS)	0.00462622	0.00478115	0.00464603	0.0121886	0.00734037	0.00671171	0.00509128	0.00837802		1.78951		0.958527
	6	Cer(d18:1)(20:4)	C38H73O3N1	591.559	DEA-SFC/MS/MS	[M + H]+	[C18H34N]+	586.5 > 264.25			5.56903	101937	94815.5	63666.3	343338	90988.9	81248.6	76274.8	129003		Cer d18:1_17:0 (IS)	0.00197855	0.00168002	0.00161582	0.00548439	0.00137341	0.000971746	0.000815452	0.00152005		1.9407		0.995885
	7	Cer(d18:1)(22:0)	C38H67O3N1	585.512	DEA-SFC/MS/MS	[M + H]+	[C18H34N]+	622.6 > 264.25			5.56747	1.09396e+06	1.1671e+06	794197	4.18705e+06	939884	1.01231e+06	849401	1.59076e+06		Cer d18:1_17:0 (IS)	0.0212334	0.0206797	0.0201563	0.0668829	0.0141869	0.0121074	0.00908093	0.0187441		2.07666		1.05822
	8	Cer(d18:1)(24:0)	C42H83O3N1	649.637	DEA-SFC/MS/MS	[M + H]+	[C18H34N]+	650.65 > 264.25			5.5757	2.09555e+06	2.23841e+06	1.47536e+06	5.91948e+06	1.61287e+06	1.65065e+06	1.28301e+06	2.57504e+06		Cer d18:1_17:0 (IS)	0.0406738	0.0396621	0.0374438	0.0945562	0.0243451	0.0197421	0.0137166	0.030342		1.6431		0.999351
	9	DG(16:0)(16:0)	C35H68O5	568.507	DEA-SFC/MS/MS	[M + NH4]+	[M + H ‒ Acyl FA]+	586.55 > 313.25			4.3206	4.56434e+06	3.62174e+06	1.85218e+06	7.28818e+06	1.02869e+07	1.49404e+07	6.81486e+06	9.6578e+06		DG 12:0_12:0 (IS)	0.017077	0.011211	0.00882262	0.0235932	0.0278068	0.0325402	0.0138481	0.0209637		1.14592		0.576859
	10	DG(16:0)(18:0)	C37H72O5	596.538	DEA-SFC/MS/MS	[M + NH4]+	[M + H ‒ Acyl FA]+	614.55 > 341.3	614.55 > 313.25		4.36283	2205365	1.97926e+06	1.4037e+06	5.67842e+06	3.55161e+06	5.12935e+06	3.99354e+06	5.83732e+06		DG 12:0_12:0 (IS)	0.00825113	0.00612677	0.00668633	0.0183821	0.00960045	0.0111718	0.00811505	0.0126708		1.74354		1.00065
	11	DG(16:0)(18:1)	C37H70O5	594.522	DEA-SFC/MS/MS	[M + NH4]+	[M + H ‒ Acyl FA]+	612.55 > 339.3	612.55 > 313.25		4.3668	6.76971e+06	5.601e+06	3.25588e+06	1.29666e+07	1.38385e+07	2.00697e+07	1.08084e+07	1.54951e+07		DG 12:0_12:0 (IS)	0.0253281	0.0173378	0.015509	0.0419752	0.0374072	0.043712	0.0219631	0.0336344		1.34731		0.685381
	12	DG(16:0)(18:2)	C37H68O5	592.507	DEA-SFC/MS/MS	[M + NH4]+	[M + H ‒ Acyl FA]+	610.55 > 337.25	610.55 > 313.25		4.3976	34787114	21154493	15976327	57274344	70109832	34876250	21631557	32970547		DG 12:0_12:0 (IS)	0.130152	0.0654835	0.0761011	0.185407	0.189516	0.0759607	0.0439562	0.0715673		1.33671		0.435155
	13	DG(16:0)(20:1)	C39H74O5	622.554	DEA-SFC/MS/MS	[M + NH4]+	[M + H ‒ Acyl FA]+	640.6 > 367.3	640.6 > 313.25		4.40923	682740	491804	381036	1.23972e+06	1.14071e+06	2.12765e+06	1.64157e+06	1.587e+06		DG 12:0_12:0 (IS)	0.0025544	0.00152237	0.00181501	0.00401319	0.00308349	0.00463403	0.00333573	0.00344481		1.42961		0.87859
	14	DG(16:0)(20:4)	C39H68O5	616.507	DEA-SFC/MS/MS	[M + NH4]+	[M + H ‒ Acyl FA]+	634.55 > 361.25	634.55 > 313.25		4.50143	789410	646771	433872	1.11847e+06	920737	1.09972e+06	934539	1.24694e+06		DG 12:0_12:0 (IS)	0.00295349	0.00200207	0.00206669	0.00362068	0.00248887	0.00239521	0.00189902	0.00270666		1.14767		0.942999
	15	DG(16:0)(22:6)	C41H68O5	640.507	DEA-SFC/MS/MS	[M + NH4]+	[M + H ‒ Acyl FA]+	658.55 > 385.25	658.55 > 313.25		4.63643	2.83014e+06	2.23728e+06	1.79237e+06	4.01088e+06	4.93221e+06	8.2794e+06	4.47359e+06	5.53016e+06		DG 12:0_12:0 (IS)	0.0105887	0.00692548	0.00853771	0.0129839	0.0133324	0.0180326	0.00909051	0.012004		1.22882		0.67255
	16	DG(18:0)(18:1)	C39H74O5	622.554	DEA-SFC/MS/MS	[M + NH4]+	[M + H ‒ Acyl FA]+	640.6 > 339.3	640.6 > 341.3		4.40197	2.45557e+06	1.7272e+06	1.548e+06	4.24926e+06	4.78085e+06	2.95776e+06	2.33592e+06	5156678		DG 12:0_12:0 (IS)	0.00918726	0.00534652	0.00737367	0.0137556	0.0129233	0.00644203	0.00474669	0.0111933		1.4538		0.823123
	17	DG(18:0)(18:2)	C39H72O5	620.538	DEA-SFC/MS/MS	[M + NH4]+	[M + H ‒ Acyl FA]+	638.55 > 337.25	638.55 > 341.3		4.4711	3602693	2.79681e+06	2.58459e+06	5.32637e+06	6.60183e+06	3395027	2.55571e+06	5.664e+06		DG 12:0_12:0 (IS)	0.0134791	0.00865749	0.0123114	0.0172424	0.0178456	0.00739439	0.00519331	0.0122945		1.33507		0.692862
	18	DG(18:0)(20:4)	C41H72O5	644.538	DEA-SFC/MS/MS	[M + NH4]+	[M + H ‒ Acyl FA]+	662.55 > 361.25	662.55 > 341.3		4.56147	4.34291e+06	4.46761e+06	2.88499e+06	2.2651e+06	4.45538e+06	5.79788e+06	5.53866e+06	1.01884e+07		DG 12:0_12:0 (IS)	0.0162485	0.0138294	0.0137423	0.00733254	0.0120435	0.0126278	0.0112548	0.0221154		0.700672		1.35259
	19	DG(18:0)(22:6)	C43H72O5	668.538	DEA-SFC/MS/MS	[M + NH4]+	[M + H ‒ Acyl FA]+	686.55 > 385.25	686.55 > 341.3		4.67267	1.41639e+06	1.31307e+06	1.14308e+06	7.04949e+06	1.3777e+06	2.58075e+06	2.63041e+06	3.88267e+06		DG 12:0_12:0 (IS)	0.00529925	0.00406458	0.00544491	0.0228205	0.0037241	0.00562089	0.00534511	0.00842789		3.01857		1.47384
	20	DG(18:1)(18:1)	C39H72O5	620.538	DEA-SFC/MS/MS	[M + NH4]+	[M + H ‒ Acyl FA]+	638.55 > 339.3			4.4255	1.43551e+07	7.98022e+06	6.82399e+06	24811868	2.32255e+07	1.15006e+07	7.89005e+06	1.37891e+07		DG 12:0_12:0 (IS)	0.0537079	0.0247027	0.0325052	0.0803205	0.0627815	0.0250483	0.0160329	0.0299312		1.43891		0.523332
	21	DG(18:1)(18:2)	C39H70O5	618.522	DEA-SFC/MS/MS	[M + NH4]+	[M + H ‒ Acyl FA]+	636.55 > 337.25	636.55 > 339.3		4.51023	23861291	11370457	10707836	38664718	45446354	1.67098e+07	9.13855e+06	16719924		DG 12:0_12:0 (IS)	0.0892744	0.0351971	0.0510053	0.125165	0.122847	0.0363941	0.0185699	0.036293		1.41534		0.344527
	22	DG(18:1)(20:1)	C41H76O5	648.569	DEA-SFC/MS/MS	[M + NH4]+	[M + H ‒ Acyl FA]+	666.6 > 367.3	666.6 > 339.3		4.51433	551274	260500	306701	843123	954359	564223	436482	491230		DG 12:0_12:0 (IS)	0.00206253	0.000806374	0.00146093	0.00272934	0.00257976	0.00122888	0.000886948	0.00106628		1.46058		0.512843
	23	DG(18:1)(20:4)	C41H70O5	642.522	DEA-SFC/MS/MS	[M + NH4]+	[M + H ‒ Acyl FA]+	660.55 > 361.25	660.55 > 339.3		4.5938	673663	470682	359479	781992	603195	551641	627156	810443		DG 12:0_12:0 (IS)	0.00252044	0.00145699	0.00171233	0.00253145	0.00163051	0.00120148	0.00127441	0.00175918		1.06697		1.07119
	24	DG(18:1)(22:6)	C43H70O5	666.522	DEA-SFC/MS/MS	[M + NH4]+	[M + H ‒ Acyl FA]+	684.55 > 385.25	684.55 > 339.3		4.70567	2.56081e+06	1.05686e+06	1.22248e+06	5.44776e+06	2.7319e+06	4.07313e+06	5.37809e+06	5.71148e+06		DG 12:0_12:0 (IS)	0.00958099	0.00327149	0.0058231	0.0176354	0.00738468	0.0088713	0.0109285	0.0123976		1.82521		1.43492
	25	DG(18:2)(18:2)	C39H68O5	616.507	DEA-SFC/MS/MS	[M + NH4]+	[M + H ‒ Acyl FA]+	634.55 > 337.25			4.5626	7.47306e+06	3.34966e+06	3.40217e+06	1.17752e+07	1.50041e+07	5.09495e+06	2.34065e+06	4.16192e+06		DG 12:0_12:0 (IS)	0.0279596	0.0103688	0.0162058	0.0381186	0.040558	0.0110968	0.00475629	0.00903405		1.41734		0.266971
	26	DG(18:2)(20:1)	C41H74O5	646.554	DEA-SFC/MS/MS	[M + NH4]+	[M + H ‒ Acyl FA]+	664.6 > 367.3	664.6 > 337.25		4.55473	620226	323295	366559	924713	1.3011e+06	586445	337277	421017		DG 12:0_12:0 (IS)	0.00232051	0.00100075	0.00174605	0.00299346	0.00351705	0.00127728	0.000685362	0.000913879		1.42702		0.333569
	27	DG(18:2)(20:4)	C41H68O5	640.507	DEA-SFC/MS/MS	[M + NH4]+	[M + H ‒ Acyl FA]+	658.55 > 361.25	658.55 > 337.25		4.6342	361049	177634	219103	660884	405205	218265	235154	306235		DG 12:0_12:0 (IS)	0.00135083	0.000549863	0.00104367	0.0021394	0.00109532	0.000475383	0.000477843	0.000664727		1.67469		0.727425
	28	DG(18:2)(22:6)	C43H68O5	664.507	DEA-SFC/MS/MS	[M + NH4]+	[M + H ‒ Acyl FA]+	682.55 > 385.25	682.55 > 337.25		4.76027	1.82974e+06	728828	915892	3.59045e+06	1.70236e+06	1.82065e+06	2.32428e+06	2.81694e+06		DG 12:0_12:0 (IS)	0.00684577	0.00225608	0.00436273	0.0116229	0.00460171	0.00396539	0.00472304	0.00611457		1.75631		1.26503
	29	DG(20:4)(22:6)	C45H68O5	688.507	DEA-SFC/MS/MS	[M + NH4]+	[M + H ‒ Acyl FA]+	706.55 > 385.25	706.55 > 361.25		4.8369	66412.7	41293.8	43102.7	151979	78115.7	131600	144921	131241		DG 12:0_12:0 (IS)	0.000248476	0.000127825	0.000205314	0.000491983	0.000211157	0.000286625	0.000294485	0.000284877		1.85303		1.16389
	30	DG(22:6)(22:6)	C47H68O5	712.507	DEA-SFC/MS/MS	[M + NH4]+	[M + H ‒ Acyl FA]+	730.55 > 385.25			4.94953	161039	47368.2	58241.4	238900	154423	246357	151254	161992		DG 12:0_12:0 (IS)	0.00060251	0.000146628	0.000277425	0.000773363	0.000417425	0.000536568	0.000307354	0.000351627		1.40266		0.69076
	31	FFA(16:0)	C16H32O2	256.24	DEA-SFC/MS/MS	[M ‒ H]‒	[M ‒ H]‒	255.25 > 255.25			5.13235	4.09628e+06	2.28477e+06	2.58562e+06	1.74821e+07	4.10363e+06	2.51981e+06	2.40349e+06	3.56826e+06		FA 17:0 (IS)	0.115559	0.0665987	0.102902	0.464844	0.10464	0.0480623	0.0430738	0.0683732		3.11678		0.729831
	32	FFA(18:0)	C18H36O2	284.272	DEA-SFC/MS/MS	[M ‒ H]‒	[M ‒ H]‒	283.25 > 283.25			5.16438	5.59059e+06	3.25964e+06	3.83585e+06	1.65987e+07	4.6609e+06	3.61933e+06	3726052	4.61646e+06		FA 17:0 (IS)	0.157715	0.0950151	0.152658	0.441356	0.11885	0.0690342	0.0667759	0.0884582		2.35039		0.826221
	33	FFA(18:1)	C18H34O2	282.256	DEA-SFC/MS/MS	[M ‒ H]‒	[M ‒ H]‒	281.25 > 281.25			5.18728	5.46064e+06	1.7553e+06	2.14336e+06	4.92261e+07	5.49242e+06	2.45839e+06	1.90508e+06	2.90353e+06		FA 17:0 (IS)	0.154049	0.0511651	0.0853011	1.30891	0.140054	0.0468907	0.0341416	0.055636		6.79392		0.480237
	34	FFA(18:2)	C18H32O2	280.24	DEA-SFC/MS/MS	[M ‒ H]‒	[M ‒ H]‒	279.25 > 279.25			5.24215	3.91795e+06	841103	1.24304e+06	5.15012e+07	4.33547e+06	1.55278e+06	1.08002e+06	1.52224e+06		FA 17:0 (IS)	0.110528	0.0245173	0.0494701	1.3694	0.110552	0.0296174	0.0193553	0.0291684		10.5066		0.34618
	35	FFA(20:1)	C20H38O2	310.287	DEA-SFC/MS/MS	[M ‒ H]‒	[M ‒ H]‒	309.3 > 309.3			5.21482	241666	113822	108147	1.60182e+06	295026	171666	136329	176777		FA 17:0 (IS)	0.00681759	0.00331778	0.00430402	0.042592	0.00752298	0.00327432	0.00244321	0.00338731		4.62697		0.539998
	36	FFA(20:4)	C20H32O2	304.24	DEA-SFC/MS/MS	[M ‒ H]‒	[M ‒ H]‒	303.25 > 303.25			5.37472	327802	101198	140035	4.4094e+06	231848	179681	183961	211733		FA 17:0 (IS)	0.00924755	0.0029498	0.00557307	0.117245	0.00591198	0.0034272	0.00329682	0.00405712		10.0692		0.787429
	37	FFA(22:6)	C22H32O2	328.24	DEA-SFC/MS/MS	[M ‒ H]‒	[M ‒ H]‒	327.25 > 327.25			5.56822	245368	77546.3	91069.8	3.93097e+06	130888	94498.3	125295	169591		FA 17:0 (IS)	0.00692202	0.00226039	0.00362438	0.104523	0.00333757	0.00180244	0.00224545	0.00324962		11.7777		1.06908
	38	FFA(30:0)	C30H60O2	452.459	DEA-SFC/MS/MS	[M ‒ H]‒	[M ‒ H]‒	451.45 > 451.45			5.09628	24212.1	20152.7	16313.7	29224.3	25051.6	13901.1	15397.2	11209.3		FA 17:0 (IS)	0.000683044	0.000587431	0.000649249	0.000777066	0.0006388	0.000265147	0.000275938	0.000214788		1.12266		0.54287
	39	HexCer(d18:1)(16:0)	C40H77O8N1	699.565	DEA-SFC/MS/MS	[M + H]+	[C18H34N]+	700.55 > 264.25			7.85283	121581	115979	87844.7	111067	158598	108207	80037.4	201093		Cer d18:1_17:0 (IS)	0.00235985	0.00205502	0.00222945	0.00177416	0.00239392	0.00129417	0.000855679	0.0023695		0.906847		0.874482
	40	HexCer(d18:1)(18:0)	C42H81O8N1	727.596	DEA-SFC/MS/MS	[M + H]+	[C18H34N]+	728.6 > 264.25			7.75113	424500	369437	220949	313782	1.63808e+06	718957	374256	1.69727e+06		Cer d18:1_17:0 (IS)	0.00823938	0.006546	0.00560757	0.00501227	0.0247256	0.00859883	0.00400116	0.0199991		0.718266		0.7202
	41	HexCer(d18:1)(20:0)	C44H85O8N1	755.628	DEA-SFC/MS/MS	[M + H]+	[C18H34N]+	756.65 > 264.25			7.71403	306632	248928	154991	199948	1.25209e+06	469205	227288	1.24135e+06		Cer d18:1_17:0 (IS)	0.00595161	0.00441071	0.00393359	0.00319391	0.0188993	0.00561176	0.00242994	0.0146269		0.687828		0.695883
	42	HexCer(d18:1)(22:0)	C46H89O8N1	783.659	DEA-SFC/MS/MS	[M + H]+	[C18H34N]+	784.65 > 264.25			7.68437	890552	765161	365384	501416	3.31543e+06	1281222	619667	3.70866e+06		Cer d18:1_17:0 (IS)	0.0172853	0.0135578	0.00927324	0.00800948	0.0500441	0.0153236	0.00662485	0.0436996		0.560344		0.769867
	43	HexCer(d18:1)(22:6)	C46H77O8N1	771.565	DEA-SFC/MS/MS	[M + H]+	[C18H34N]+	772.55 > 264.25			8.03697	345854	471811	219793	327292	1.80891e+06	950156	478037	2.3731e+06		Cer d18:1_17:0 (IS)	0.0067129	0.00835995	0.00557824	0.00522808	0.0273042	0.011364	0.00511069	0.0279626		0.716939		0.855309
	44	HexCer(d18:1)(24:0)	C48H93O8N1	811.69	DEA-SFC/MS/MS	[M + H]+	[C18H34N]+	812.7 > 264.25			7.6622	3046407	2996145	1524259	2.03632e+06	12868536	4741556	2.46423e+06	15076278		Cer d18:1_17:0 (IS)	0.0591296	0.0530883	0.0386849	0.0325277	0.194241	0.0567097	0.0263451	0.177646		0.634592		0.81287
	45	LPC(16:0)_sn-1	C24H50O7N1P1	495.332	DEA-SFC/MS/MS	[M + H]+	[C5H15O4NP]+	496.35 > 184.05			8.79483	25917506	27377348	15919863	74585192	26499132	39362296	25766148	31375092		LPC 17:0 (IS)	0.182956	0.165856	0.137779	0.385439	0.118997	0.153438	0.0847033	0.115337		1.5		0.73427
	46	LPC(16:0)_sn-2	C24H50O7N1P1	495.332	DEA-SFC/MS/MS	[M + H]+	[C5H15O4NP]+	496.35 > 184.05			8.90307	2.13652e+06	2764602	1.649e+06	19864460	1.35279e+06	2061579	1.90568e+06	2.46262e+06		LPC 17:0 (IS)	0.015082	0.0167484	0.0142713	0.102655	0.00607483	0.00803624	0.00626471	0.00905279		3.67341		1.0855
	47	LPC(18:0)_sn-1	C26H54O7N1P1	523.364	DEA-SFC/MS/MS	[M + H]+	[C5H15O4NP]+	524.35 > 184.05			8.73123	13933418	13429316	12578863	71415936	10597282	16199792	17109976	22162214		LPC 17:0 (IS)	0.0983583	0.0813569	0.108864	0.369061	0.047588	0.0631484	0.0562471	0.08147		2.65935		1.24365
	48	LPC(18:0)_sn-2	C26H54O7N1P1	523.364	DEA-SFC/MS/MS	[M + H]+	[C5H15O4NP]+	524.35 > 184.05			8.83947	595299	733627	429017	n.d.	386887	638208	416329	757382		LPC 17:0 (IS)	0.00420232	0.00444443	0	0	0.00173735	0.0024878	0.00136864	0.00278419		0		0.982883
	49	LPC(18:1)_sn-1	C26H52O7N1P1	521.348	DEA-SFC/MS/MS	[M + H]+	[C5H15O4NP]+	522.35 > 184.05			8.82043	2823489	2311108	1.09852e+06	29971850	2.26439e+06	2684760	1.7198e+06	2.42494e+06		LPC 17:0 (IS)	0.0199315	0.0140011	0.00950717	0.154888	0.0101685	0.0104655	0.00565365	0.00891426		4.84475		0.706018
	50	LPC(18:1)_sn-2	C26H52O7N1P1	521.348	DEA-SFC/MS/MS	[M + H]+	[C5H15O4NP]+	522.35 > 184.05			8.93503	2.18538e+06	2.55584e+06	1.27701e+06	19844920	1.54327e+06	1.72496e+06	1.07623e+06	2.52463e+06		LPC 17:0 (IS)	0.0154269	0.0154837	0.0110519	0.102554	0.00693021	0.00672405	0.00353798	0.00928072		3.67531		0.938806
	51	LPC(18:2)_sn-1	C26H50O7N1P1	519.332	DEA-SFC/MS/MS	[M + H]+	[C5H15O4NP]+	520.35 > 184.05			8.92873	2.47016e+06	3.10953e+06	1.90843e+06	30356028	1.63206e+06	2.40768e+06	1.74296e+06	2.71404e+06		LPC 17:0 (IS)	0.0174373	0.018838	0.0165165	0.156873	0.00732892	0.00938537	0.00572978	0.00997701		4.77982		0.939722
	52	LPC(18:2)_sn-2	C26H50O7N1P1	519.332	DEA-SFC/MS/MS	[M + H]+	[C5H15O4NP]+	520.35 > 184.05			9.03623	5031499	6785150	5016050	43035072	3705158	4.1859e+06	2.89565e+06	8374591		LPC 17:0 (IS)	0.0355182	0.0411055	0.0434115	0.222395	0.0166383	0.0163171	0.00951912	0.0307856		3.46899		1.22301
	53	LPC(20:0)_sn-1	C28H58O7N1P1	551.395	DEA-SFC/MS/MS	[M + H]+	[C5H15O4NP]+	552.4 > 184.05			8.6781	425614	418958	343664	485058	386378	429159	428746	461694		LPC 17:0 (IS)	0.00300448	0.00253811	0.00297425	0.00250666	0.00173506	0.0016729	0.00140945	0.00169722		0.988871		0.911592
	54	LPC(20:0)_sn-2	C28H58O7N1P1	551.395	DEA-SFC/MS/MS	[M + H]+	[C5H15O4NP]+	552.4 > 184.05			8.78237	38882	28524.5	30114.4	41843.7	56108.1	90052.6	24390.4	37607.7		LPC 17:0 (IS)	0.000274474	0.000172806	0.000260626	0.000216239	0.000251959	0.000351034	8.01809e-05	0.000138249		1.06614		0.362243
	55	LPC(20:4)_sn-1	C28H50O7N1P1	543.332	DEA-SFC/MS/MS	[M + H]+	[C5H15O4NP]+	544.35 > 184.05			8.98617	185790	341750	180278	641412	178090	270511	188712	241558		LPC 17:0 (IS)	0.00131153	0.00207038	0.00156021	0.00331467	0.000799727	0.00105448	0.00062037	0.000887984		1.44146		0.813477
	56	LPC(20:4)_sn-2	C28H50O7N1P1	543.332	DEA-SFC/MS/MS	[M + H]+	[C5H15O4NP]+	544.35 > 184.05			9.08623	1.724e+06	1.62868e+06	1.14928e+06	27664602	1.66611e+06	1.81845e+06	1.71316e+06	2.1357e+06		LPC 17:0 (IS)	0.01217	0.00986679	0.00994646	0.142964	0.00748181	0.00708851	0.00563182	0.00785098		6.93888		0.92536
	57	LPC(22:0)_sn-1	C30H62O7N1P1	579.426	DEA-SFC/MS/MS	[M + H]+	[C5H15O4NP]+	580.45 > 184.05			8.77613	n.d.	47294.3	n.d.	n.d.	n.d.	n.d.	n.d.	n.d.		LPC 17:0 (IS)	0	0.000286516	0	0	0	0	0	0		0		#DIV/0!
	58	LPC(22:0)_sn-2	C30H62O7N1P1	579.426	DEA-SFC/MS/MS	[M + H]+	[C5H15O4NP]+	580.45 > 184.05			8.89073	5534529	2.41162e+06	2679216	3738211	5950622	8772675	6934529	10512538		LPC 17:0 (IS)	0.0390691	0.0146099	0.0231873	0.0193182	0.0267218	0.0341968	0.0227965	0.0386449		0.791845		1.00858
	59	LPC(22:6)_sn-1	C30H50O7N1P1	567.332	DEA-SFC/MS/MS	[M + H]+	[C5H15O4NP]+	568.35 > 184.05			9.09883	590769	708670	391596	15010831	272732	493592	132344	288585		LPC 17:0 (IS)	0.00417034	0.00429324	0.00338907	0.0775725	0.00122473	0.00192407	0.000435067	0.00106086		9.56588		0.475079
	60	LPC(22:6)_sn-2	C30H50O7N1P1	567.332	DEA-SFC/MS/MS	[M + H]+	[C5H15O4NP]+	568.35 > 184.05			9.204	21555622	12805983	9619457	123135536	10500586	11262273	5987754	10210259		LPC 17:0 (IS)	0.152165	0.0775807	0.0832517	0.636336	0.0471538	0.0439015	0.0196841	0.0375337		3.13211		0.628385
	61	LPE(16:0)_sn-1	C21H44O7N1P1	453.286	DEA-SFC/MS/MS	[M + H]+	[C5H15O4NP]+	454.3 > 313.25			11.0957	138433	112375	50010.1	951041	121318	160688	106344	143742		LPE 17:0 (IS)	0.000897888	0.000628894	0.000442318	0.00584555	0.000668712	0.000716787	0.000414042	0.000636549		4.11838		0.758276
	62	LPE(16:0)_sn-2	C21H44O7N1P1	453.286	DEA-SFC/MS/MS	[M + H]+	[C5H15O4NP]+	454.3 > 313.25			11.3	9458.87	8881.33	11571	79657	14736.3	21576.6	9608.26	38640.6		LPE 17:0 (IS)	6.13509e-05	4.97035e-05	0.000102341	0.00048961	8.12271e-05	9.62472e-05	3.74089e-05	0.000171117		5.33027		1.17496
	63	LPE(18:0)_sn-1	C23H48O7N1P1	481.317	DEA-SFC/MS/MS	[M + H]+	[C5H15O4NP]+	482.3 > 341.3			10.9968	250227	163546	152392	4980601	160042	196890	156169	232834		LPE 17:0 (IS)	0.00162299	0.000915271	0.00134784	0.0306131	0.000882158	0.000878273	0.000608031	0.00103109		12.5917		0.931089
	64	LPE(18:0)_sn-2	C23H48O7N1P1	481.317	DEA-SFC/MS/MS	[M + H]+	[C5H15O4NP]+	482.3 > 341.3			-	n.d.	n.d.	n.d.	n.d.	n.d.	n.d.	n.d.	n.d.		LPE 17:0 (IS)	0	0	0	0	0	0	0	0		#DIV/0!		#DIV/0!
	65	LPE(18:1)_sn-1	C23H46O7N1P1	479.301	DEA-SFC/MS/MS	[M + H]+	[C5H15O4NP]+	480.3 > 339.3			11.1189	71313.7	35927.3	26489.1	1004096	67433.8	65357.5	59563.5	100678		LPE 17:0 (IS)	0.000462546	0.000201064	0.000234284	0.00617165	0.000371699	0.000291542	0.000231905	0.000445846		9.65317		1.02188
	66	LPE(18:1)_sn-2	C23H46O7N1P1	479.301	DEA-SFC/MS/MS	[M + H]+	[C5H15O4NP]+	480.3 > 339.3			11.2865	192681	37718.7	34695.9	224134	166706	115550	53926.2	614641		LPE 17:0 (IS)	0.00124974	0.00021109	0.00030687	0.00137763	0.000918894	0.000515435	0.000209957	0.00272189		1.15311		2.04405
	67	LPE(18:2)_sn-1	C23H44O7N1P1	477.286	DEA-SFC/MS/MS	[M + H]+	[C5H15O4NP]+	478.3 > 337.25			11.264	33656.5	27452.1	25171.7	442125	20818.7	23187.8	14700.9	28569.6		LPE 17:0 (IS)	0.000218298	0.000153633	0.000222633	0.00271751	0.000114754	0.000103434	5.72366e-05	0.000126518		7.90507		0.842186
	68	LPE(18:2)_sn-2	C23H44O7N1P1	477.286	DEA-SFC/MS/MS	[M + H]+	[C5H15O4NP]+	478.3 > 337.25			11.4256	59582.4	55051.2	33885.8	523182	36365.6	41645.2	28687.7	62878.8		LPE 17:0 (IS)	0.000386456	0.000308089	0.000299705	0.00321573	0.000200449	0.000185768	0.000111693	0.000278454		5.06149		1.01017
	69	LPE(20:4)_sn-1	C25H44O7N1P1	501.286	DEA-SFC/MS/MS	[M + H]+	[C5H15O4NP]+	502.3 > 361.25			11.3449	n.d.	n.d.	n.d.	n.d.	n.d.	n.d.	n.d.	n.d.		LPE 17:0 (IS)	0	0	0	0	0	0	0	0		#DIV/0!		#DIV/0!
	70	LPE(20:4)_sn-2	C25H44O7N1P1	501.286	DEA-SFC/MS/MS	[M + H]+	[C5H15O4NP]+	502.3 > 361.25			11.4968	99817.2	38109.5	34261.1	605274	52031.7	48751.7	31758.9	73527.8		LPE 17:0 (IS)	0.000647422	0.000213276	0.000303025	0.0037203	0.000286801	0.000217468	0.000123651	0.000325612		4.67449		0.890918
	71	LPE(22:6)_sn-1	C27H44O7N1P1	525.286	DEA-SFC/MS/MS	[M + H]+	[C5H15O4NP]+	526.3 > 385.25			11.4775	32292.4	10083	11788.8	510333	17406.2	10923.7	6413.63	15723.2		LPE 17:0 (IS)	0.000209451	5.64284e-05	0.000104267	0.00313675	9.59439e-05	4.87275e-05	2.49709e-05	6.96291e-05		12.1898		0.653896
	72	LPE(22:6)_sn-2	C27H44O7N1P1	525.286	DEA-SFC/MS/MS	[M + H]+	[C5H15O4NP]+	526.3 > 385.25			11.6359	1.07441e+06	418177	336087	24717186	543455	631969	446462	612756		LPE 17:0 (IS)	0.00696873	0.00234029	0.00297254	0.151924	0.00299556	0.00281904	0.00173826	0.00271354		16.6394		0.765625
	73	MG(18:0)	C21H42O4	358.308	DEA-SFC/MS/MS	[M + H]+	[M + H ‒ H2O]+	359.3 > 341.3			5.09037	326238	151400	171354	456576	239364	247439	128657	170804		MG 17:0 (IS)	0.00142728	0.000567952	0.000923849	0.00177902	0.000735271	0.000619679	0.000278537	0.000413332		1.35467		0.510623
	74	PC(16:0)(16:0)	C40H80O8N1P1	761.593	DEA-SFC/MS/MS	[M + CH3COO]‒	[Acyl FA ‒ H]‒	792.6 > 255.25			7.51508	1.16861e+07	1.38002e+07	9.85865e+06	1.06649e+07	1.26585e+07	19047974	1.78523e+07	1.61405e+07		PC 17:0_17:0 (IS)	0.643437	0.668018	0.733349	0.545157	0.584685	0.73748	0.614142	0.725567		0.974876		1.01327
	75	PC(16:0)(18:0)	C42H84O8N1P1	759.578	DEA-SFC/MS/MS	[M + CH3COO]‒	[Acyl FA ‒ H]‒	820.6 > 255.25	820.6 > 283.25		7.50028	2.9227e+06	3.36189e+06	3.18855e+06	3.6003e+06	2.48838e+06	3.22572e+06	3.56142e+06	3.86436e+06		PC 17:0_17:0 (IS)	0.160924	0.162737	0.237184	0.184037	0.114936	0.12489	0.122517	0.173715		1.30143		1.2352
	76	PC(16:0)(18:1)	C42H82O8N1P1	757.562	DEA-SFC/MS/MS	[M + CH3COO]‒	[Acyl FA ‒ H]‒	818.6 > 255.25	818.6 > 281.25		7.54502	1.66464e+07	1.68896e+07	1.21607e+07	13492638	27849716	34121545	29382263	35483925		PC 17:0_17:0 (IS)	0.916555	0.817564	0.904588	0.689702	1.28635	1.32108	1.01079	1.59512		0.919366		0.999412
	77	PC(16:0)(18:2)	C42H80O8N1P1	787.609	DEA-SFC/MS/MS	[M + CH3COO]‒	[Acyl FA ‒ H]‒	816.6 > 255.25	816.6 > 279.25		7.61205	1.34718e+07	1.43561e+07	10721489	1.00199e+07	1.49326e+07	17645454	17980861	20909519		PC 17:0_17:0 (IS)	0.741759	0.694928	0.797532	0.512185	0.689722	0.683179	0.618565	0.93995		0.911624		1.1352
	78	PC(16:0)(20:1)	C44H86O8N1P1	781.562	DEA-SFC/MS/MS	[M + CH3COO]‒	[Acyl FA ‒ H]‒	846.6 > 255.25	846.6 > 309.3		7.53042	442724	506775	314100	299869	520719	711352	675076	543246		PC 17:0_17:0 (IS)	0.0243765	0.0245311	0.0233648	0.0153284	0.0240515	0.0275414	0.0232235	0.0244207		0.791147		0.923463
	79	PC(16:0)(20:4)	C44H80O8N1P1	805.562	DEA-SFC/MS/MS	[M + CH3COO]‒	[Acyl FA ‒ H]‒	840.6 > 255.25	840.6 > 303.25		7.64205	3285723	3.84246e+06	2.37499e+06	2.97006e+06	9.6952e+06	1.41652e+07	12552638	1.33231e+07		PC 17:0_17:0 (IS)	0.180913	0.185999	0.176667	0.15182	0.447813	0.548434	0.431827	0.598917		0.895275		1.03463
	80	PC(16:0)(22:6)	C46H80O8N1P1	789.625	DEA-SFC/MS/MS	[M + CH3COO]‒	[Acyl FA ‒ H]‒	864.6 > 255.25	864.6 > 327.25		7.71665	18138489	19669900	1.64232e+07	18146034	24670245	34095535	31325357	32589806		PC 17:0_17:0 (IS)	0.998709	0.952149	1.22167	0.92757	1.1395	1.32008	1.07763	1.46502		1.10169		1.03378
	81	PC(18:0)(18:0)	C44H88O8N1P1	787.609	DEA-SFC/MS/MS	[M + CH3COO]‒	[Acyl FA ‒ H]‒	848.65 > 283.25			7.48635	146593	148144	129124	220718	110629	86379.4	61510.2	140947		PC 17:0_17:0 (IS)	0.00807147	0.0071711	0.00960507	0.0112825	0.00510984	0.00334435	0.00211603	0.00633603		1.37034		0.999748
	82	PC(18:0)(18:1)	C44H86O8N1P1	785.593	DEA-SFC/MS/MS	[M + CH3COO]‒	[Acyl FA ‒ H]‒	846.6 > 283.25	846.6 > 281.25		7.51615	3.71438e+06	4.19857e+06	3.49165e+06	3.9603e+06	3915713	3.24908e+06	2.783e+06	5.15398e+06		PC 17:0_17:0 (IS)	0.204515	0.203238	0.259731	0.202438	0.180863	0.125795	0.0957388	0.231688		1.13346		1.06773
	83	PC(18:0)(18:2)	C44H84O8N1P1	815.64	DEA-SFC/MS/MS	[M + CH3COO]‒	[Acyl FA ‒ H]‒	844.6 > 283.25	844.6 > 279.25		7.58318	7.45279e+06	7.40543e+06	8.00082e+06	8.04854e+06	3.32116e+06	3.01445e+06	3.31923e+06	5.13426e+06		PC 17:0_17:0 (IS)	0.410352	0.35847	0.595152	0.411417	0.153401	0.11671	0.114186	0.230802		1.30923		1.2772
	84	PC(18:0)(20:1)	C46H90O8N1P1	809.593	DEA-SFC/MS/MS	[M + CH3COO]‒	[Acyl FA ‒ H]‒	874.65 > 283.25	874.65 > 309.3		7.50898	129492	149719	115598	107304	39983.2	43703.3	55585.2	59072.4		PC 17:0_17:0 (IS)	0.00712985	0.00724738	0.00859889	0.00548504	0.00184679	0.00169206	0.0019122	0.00265549		0.9796		1.29073
	85	PC(18:0)(20:4)	C46H84O8N1P1	833.593	DEA-SFC/MS/MS	[M + CH3COO]‒	[Acyl FA ‒ H]‒	868.6 > 283.25	868.6 > 303.25		7.60575	2.45468e+06	3.35177e+06	2.60107e+06	3.21319e+06	2.30852e+06	2.57689e+06	2.44506e+06	3203591		PC 17:0_17:0 (IS)	0.135155	0.162247	0.193484	0.164248	0.106628	0.0997695	0.0841133	0.144012		1.20286		1.10527
	86	PC(18:0)(22:6)	C48H84O8N1P1	785.593	DEA-SFC/MS/MS	[M + CH3COO]‒	[Acyl FA ‒ H]‒	892.6 > 283.25	892.6 > 327.25		7.68765	1.45732e+07	1.66966e+07	1.60818e+07	1.81575e+07	5.31281e+06	5496884	5.48864e+06	9073238		PC 17:0_17:0 (IS)	0.802405	0.808221	1.19627	0.928158	0.245394	0.212823	0.188816	0.407871		1.31901		1.30219
	87	PC(18:1)(18:1)	C44H84O8N1P1	783.578	DEA-SFC/MS/MS	[M + CH3COO]‒	[Acyl FA ‒ H]‒	844.6 > 281.25			7.58372	2.01781e+06	1.87215e+06	1.50274e+06	1.51105e+06	1.67758e+06	2.16764e+06	2.10369e+06	2.59372e+06		PC 17:0_17:0 (IS)	0.111101	0.0906238	0.111784	0.0772404	0.0774859	0.0839245	0.0723695	0.116596		0.937039		1.17071
	88	PC(18:1)(18:2)	C44H82O8N1P1	815.64	DEA-SFC/MS/MS	[M + CH3COO]‒	[Acyl FA ‒ H]‒	842.6 > 281.25	842.6 > 279.25		7.65068	3.30326e+06	3.13764e+06	3.09607e+06	2.63877e+06	2.25126e+06	2.68571e+06	3.3271e+06	4.72135e+06		PC 17:0_17:0 (IS)	0.181878	0.151882	0.230305	0.134886	0.103984	0.103982	0.114456	0.21224		1.09417		1.57091
	89	PC(18:1)(20:0)	C46H90O8N1P1	813.625	DEA-SFC/MS/MS	[M + CH3COO]‒	[Acyl FA ‒ H]‒	874.65 > 281.25	874.65 > 311.3		7.49472	72630.8	38179.4	31094.2	35323.8	157776	97554.4	28350.2	217317		PC 17:0_17:0 (IS)	0.00399907	0.00184812	0.00231298	0.00180565	0.00728755	0.00377701	0.000975284	0.00976911		0.704377		0.971063
	90	PC(18:1)(20:1)	C46H88O8N1P1	807.578	DEA-SFC/MS/MS	[M + CH3COO]‒	[Acyl FA ‒ H]‒	872.65 > 281.25	872.65 > 309.3		7.56175	144331	155464	88588.8	81368.8	69656.1	96117.7	65173.6	68729		PC 17:0_17:0 (IS)	0.00794689	0.00752544	0.0065898	0.00415932	0.00321735	0.00372139	0.00224205	0.00308959		0.694732		0.768388
	91	PC(18:1)(20:4)	C46H82O8N1P1	843.672	DEA-SFC/MS/MS	[M + CH3COO]‒	[Acyl FA ‒ H]‒	866.6 > 281.25	866.6 > 303.25		7.66595	423349	487672	304090	467060	721468	946370	1.04593e+06	1.22633e+06		PC 17:0_17:0 (IS)	0.0233097	0.0236064	0.0226201	0.0238747	0.033324	0.0366406	0.0359813	0.0551273		0.99102		1.30221
	92	PC(18:1)(22:0)	C48H94O8N1P1	831.578	DEA-SFC/MS/MS	[M + CH3COO]‒	[Acyl FA ‒ H]‒	902.7 > 281.25	902.7 > 339.35		7.47282	144987	114856	57086.1	77870.5	451439	166969	87233.3	589218		PC 17:0_17:0 (IS)	0.00798299	0.00555976	0.00424643	0.0039805	0.0208516	0.00646453	0.00300094	0.0264872		0.607478		1.07952
	93	PC(18:1)(22:6)	C48H82O8N1P1	871.703	DEA-SFC/MS/MS	[M + CH3COO]‒	[Acyl FA ‒ H]‒	890.6 > 281.25	890.6 > 327.25		7.76285	3.11807e+06	3.19673e+06	2908253	3.37695e+06	2.20547e+06	3.00463e+06	3.30764e+06	4.0993e+06		PC 17:0_17:0 (IS)	0.171681	0.154742	0.216334	0.172619	0.101869	0.11633	0.113787	0.184277		1.19156		1.36602
	94	PC(18:1)(24:0)	C50H98O8N1P1	899.734	DEA-SFC/MS/MS	[M + CH3COO]‒	[Acyl FA ‒ H]‒	930.7 > 281.25	930.7 > 367.35		7.45078	324221	313959	123066	187189	1.03258e+06	369308	197704	1.48508e+06		PC 17:0_17:0 (IS)	0.0178517	0.0151976	0.00915447	0.00956853	0.047694	0.0142985	0.00680126	0.0667592		0.566517		1.1866
	95	PC(18:1)(26:0)	C52H102O8N1P1	781.562	DEA-SFC/MS/MS	[M + CH3COO]‒	[Acyl FA ‒ H]‒	958.75 > 281.25	958.75 > 395.4		7.45092	12372.7	18522.8	n.d.	n.d.	50579.4	24506.2	n.d.	83552.4		PC 17:0_17:0 (IS)	0.000681245	0.000896621	0	0	0.00233622	0.000948807	0	0.00375595		0		1.14335
	96	PC(18:2)(18:2)	C44H80O8N1P1	813.625	DEA-SFC/MS/MS	[M + CH3COO]‒	[Acyl FA ‒ H]‒	840.6 > 279.25			7.71122	784114	921345	954759	857959	577638	639325	961992	1.5684e+06		PC 17:0_17:0 (IS)	0.0431735	0.044599	0.071021	0.0438563	0.0266806	0.0247527	0.0330938	0.0705046		1.30881		2.01423
	97	PC(18:2)(20:0)	C46H88O8N1P1	811.609	DEA-SFC/MS/MS	[M + CH3COO]‒	[Acyl FA ‒ H]‒	872.65 > 279.25	872.65 > 311.3		7.55518	93180	77752.4	43572.8	39555.3	36205.2	26835.8	27660.3	17880.6		PC 17:0_17:0 (IS)	0.00513051	0.00376371	0.00324122	0.00202195	0.00167229	0.001039	0.000951552	0.00080379		0.591751		0.64742
	98	PC(18:2)(20:1)	C46H86O8N1P1	805.562	DEA-SFC/MS/MS	[M + CH3COO]‒	[Acyl FA ‒ H]‒	870.6 > 279.25	870.6 > 309.3		7.63708	211137	207431	154536	135725	93083.8	88454.1	92879.5	111535		PC 17:0_17:0 (IS)	0.0116252	0.010041	0.0114954	0.00693784	0.00429946	0.00342467	0.00319518	0.00501388		0.850781		1.06278
	99	PC(18:2)(20:4)	C46H80O8N1P1	841.656	DEA-SFC/MS/MS	[M + CH3COO]‒	[Acyl FA ‒ H]‒	864.6 > 279.25	864.6 > 303.25		7.74872	428147	463002	449468	585766	549807	602147	784935	1.04635e+06		PC 17:0_17:0 (IS)	0.0235738	0.0224123	0.0334343	0.0299426	0.0253951	0.0233133	0.0270028	0.0470366		1.37817		1.52005
	100	PC(18:2)(22:0)	C48H92O8N1P1	829.562	DEA-SFC/MS/MS	[M + CH3COO]‒	[Acyl FA ‒ H]‒	900.65 > 279.25	900.65 > 339.35		7.52585	n.d.	n.d.	n.d.	15301.8	19311.4	n.d.	n.d.	31361.4		PC 17:0_17:0 (IS)	0	0	0	0.000782182	0.000891976	0	0	0.0014098		#DIV/0!		1.58053
	101	PC(18:2)(22:6)	C48H80O8N1P1	869.687	DEA-SFC/MS/MS	[M + CH3COO]‒	[Acyl FA ‒ H]‒	888.6 > 279.25	888.6 > 327.25		7.82388	4.72375e+06	4.9131e+06	4.38947e+06	5.07304e+06	2.79531e+06	3909942	4257536	5.72237e+06		PC 17:0_17:0 (IS)	0.260091	0.237825	0.326517	0.259318	0.129113	0.151381	0.146465	0.257239		1.17657		1.43926
	102	PC(18:2)(24:0)	C50H96O8N1P1	861.625	DEA-SFC/MS/MS	[M + CH3COO]‒	[Acyl FA ‒ H]‒	928.7 > 279.25	928.7 > 367.35		7.48895	29135	21180.5	18724.9	20210.3	38754.9	n.d.	n.d.	103179		PC 17:0_17:0 (IS)	0.00160418	0.00102527	0.00139287	0.00103309	0.00179006	0	0	0.00463821		0.922611		2.5911
	103	PC(20:0)(22:6)	C50H88O8N1P1	835.609	DEA-SFC/MS/MS	[M + CH3COO]‒	[Acyl FA ‒ H]‒	920.65 > 311.3	920.65 > 327.25		7.66005	85606.7	103000	72475.4	148665	15451.4	11468.9	n.d.	n.d.		PC 17:0_17:0 (IS)	0.00471352	0.00498587	0.00539118	0.00759928	0.000713688	0.000444041	0	0		1.33931		0
	104	PC(20:1)(20:4)	C48H86O8N1P1	859.609	DEA-SFC/MS/MS	[M + CH3COO]‒	[Acyl FA ‒ H]‒	894.6 > 309.3	894.6 > 303.25		7.66018	27789.8	52363.5	27633	24523.1	27197.1	33593.2	27346.1	27640.9		PC 17:0_17:0 (IS)	0.00153011	0.00253473	0.00205552	0.00125354	0.00125621	0.00130063	0.00094074	0.00124255		0.81407		0.853901
	105	PC(20:1)(22:6)	C50H86O8N1P1	829.562	DEA-SFC/MS/MS	[M + CH3COO]‒	[Acyl FA ‒ H]‒	918.6 > 309.3	918.6 > 327.25		7.74208	178109	196999	133117	140668	52362.8	47612.4	38926.4	57066.1		PC 17:0_17:0 (IS)	0.00980673	0.00953601	0.00990208	0.00719051	0.00241859	0.00184341	0.00133912	0.00256531		0.883669		0.916102
	106	PC(20:4)(20:4)	C48H80O8N1P1	853.562	DEA-SFC/MS/MS	[M + CH3COO]‒	[Acyl FA ‒ H]‒	888.6 > 303.25			7.78682	n.d.	22826	21668.7	27800.4	25787.6	36637.5	40379.1	37179.3		PC 17:0_17:0 (IS)	0	0.00110492	0.00161185	0.00142107	0.00119111	0.00141849	0.00138909	0.00167133		2.74492		1.17276
	107	PC(20:4)(22:6)	C50H80O8N1P1	877.562	DEA-SFC/MS/MS	[M + CH3COO]‒	[Acyl FA ‒ H]‒	912.6 > 303.25	912.6 > 327.25		7.85892	263688	278206	229131	359482	187583	301854	268380	427696		PC 17:0_17:0 (IS)	0.0145187	0.013467	0.0170442	0.0183756	0.00866429	0.0116869	0.00923263	0.0192263		1.26564		1.39839
	108	PC(22:6)(22:6)	C52H80O8N1P1	877.562	DEA-SFC/MS/MS	[M + CH3COO]‒	[Acyl FA ‒ H]‒	936.6 > 327.25			7.92765	174754	172399	168974	315264	77379.5	131093	132777	215163		PC 17:0_17:0 (IS)	0.00962202	0.00834524	0.0125694	0.0161153	0.00357409	0.00507554	0.0045677	0.00967227		1.5965		1.64631
	109	PE(16:0)(16:0)	C37H74O8N1P1	691.515	DEA-SFC/MS/MS	[M ‒ H]‒	[Acyl FA ‒ H]‒	690.5 > 255.25			9.16198	465579	507695	271455	444811	250378	412748	359374	393610		PE 17:0_17:0 (IS)	0.00314575	0.0030535	0.00229325	0.0024053	0.00136707	0.00175056	0.00136414	0.0019529		0.757923		1.06396
	110	PE(16:0)(18:0)	C39H78O8N1P1	719.547	DEA-SFC/MS/MS	[M ‒ H]‒	[Acyl FA ‒ H]‒	718.55 > 255.25	718.55 > 283.25		9.11842	1.07393e+06	1.07492e+06	904140	1.11841e+06	549191	819142	644770	753898		PE 17:0_17:0 (IS)	0.00725614	0.00646503	0.00763816	0.00604775	0.00299859	0.00347417	0.00244747	0.00374048		0.997431		0.955998
	111	PE(16:0)(18:1)	C39H76O8N1P1	717.531	DEA-SFC/MS/MS	[M ‒ H]‒	[Acyl FA ‒ H]‒	716.5 > 255.25	716.5 > 281.25		9.19335	3576318	3.88524e+06	2.02155e+06	3.52595e+06	4.99754e+06	4.15858e+06	3.37227e+06	6.05007e+06		PE 17:0_17:0 (IS)	0.0241639	0.0233676	0.017078	0.0190665	0.0272867	0.0176375	0.0128007	0.0300175		0.760433		0.953122
	112	PE(16:0)(18:2)	C39H74O8N1P1	715.515	DEA-SFC/MS/MS	[M ‒ H]‒	[Acyl FA ‒ H]‒	714.5 > 255.25	714.5 > 279.25		9.28558	2.81857e+06	3.20129e+06	2.23492e+06	1.99005e+06	2.45253e+06	2.45922e+06	2.07958e+06	2.98715e+06		PE 17:0_17:0 (IS)	0.019044	0.019254	0.0188806	0.0107611	0.0133909	0.0104301	0.00789382	0.0148208		0.773975		0.953557
	113	PE(16:0)(20:1)	C41H80O8N1P1	745.562	DEA-SFC/MS/MS	[M ‒ H]‒	[Acyl FA ‒ H]‒	744.55 > 255.25	744.55 > 309.3		9.16245	177970	221906	96431.1	107551	169965	224708	166164	187752		PE 17:0_17:0 (IS)	0.00120248	0.00133464	0.000814649	0.000581577	0.000928014	0.000953039	0.00063074	0.000931537		0.550319		0.830533
	114	PE(16:0)(20:4)	C41H74O8N1P1	739.515	DEA-SFC/MS/MS	[M ‒ H]‒	[Acyl FA ‒ H]‒	738.5 > 255.25	738.5 > 303.25		9.31805	1.4522e+06	1.47979e+06	893420	955824	1.80883e+06	1.93206e+06	1.57827e+06	2.05384e+06		PE 17:0_17:0 (IS)	0.00981198	0.00890012	0.00754761	0.0051686	0.00987627	0.0081943	0.00599092	0.0101902		0.679571		0.89544
	115	PE(16:0)(22:6)	C43H74O8N1P1	763.515	DEA-SFC/MS/MS	[M ‒ H]‒	[Acyl FA ‒ H]‒	762.5 > 255.25	762.5 > 327.25		9.43625	1.65657e+07	1.5649e+07	1.05998e+07	1.10541e+07	1.73293e+07	1.96029e+07	1.66408e+07	1.87174e+07		PE 17:0_17:0 (IS)	0.111928	0.09412	0.0895469	0.0597747	0.0946181	0.0831405	0.0631666	0.0928667		0.724692		0.877781
	116	PE(18:0)(18:1)	C41H80O8N1P1	745.562	DEA-SFC/MS/MS	[M ‒ H]‒	[Acyl FA ‒ H]‒	744.55 > 283.25	744.55 > 281.25		9.14415	3.79341e+06	4.07789e+06	2.80779e+06	3.99114e+06	5.21531e+06	3.86444e+06	2.89458e+06	6856881		PE 17:0_17:0 (IS)	0.0256307	0.0245263	0.0237202	0.021582	0.0284757	0.01639	0.0109875	0.0340205		0.903208		1.00317
	117	PE(18:0)(18:2)	C41H78O8N1P1	743.547	DEA-SFC/MS/MS	[M ‒ H]‒	[Acyl FA ‒ H]‒	742.55 > 283.25	742.55 > 279.25		9.22722	11483082	1.09285e+07	9.8448e+06	11077036	7.09586e+06	7.25863e+06	6.41682e+06	1.01341e+07		PE 17:0_17:0 (IS)	0.077587	0.0657291	0.0831687	0.0598988	0.0387435	0.0307855	0.0243575	0.0502804		0.998266		1.07348
	118	PE(18:0)(20:1)	C43H84O8N1P1	773.593	DEA-SFC/MS/MS	[M ‒ H]‒	[Acyl FA ‒ H]‒	772.6 > 283.25	772.6 > 309.3		9.11948	329247	377508	215797	209971	161070	185484	151950	152475		PE 17:0_17:0 (IS)	0.0022246	0.00227051	0.00182305	0.00113541	0.000879448	0.000786681	0.000576785	0.000756508		0.658152		0.800234
	119	PE(18:0)(20:4)	C43H78O8N1P1	767.547	DEA-SFC/MS/MS	[M ‒ H]‒	[Acyl FA ‒ H]‒	766.55 > 283.25	766.55 > 303.25		9.26505	13734851	14916115	13180392	13062300	1.03957e+07	11884553	11116528	14368116		PE 17:0_17:0 (IS)	0.0928014	0.0897122	0.111348	0.0706341	0.0567606	0.0504051	0.042197	0.0712877		0.997087		1.05896
	120	PE(18:0)(22:6)	C45H78O8N1P1	791.547	DEA-SFC/MS/MS	[M ‒ H]‒	[Acyl FA ‒ H]‒	790.55 > 283.25	790.55 > 327.25		9.37788	64214672	66098707	54539446	61533534	44479449	54235740	44542697	61598743		PE 17:0_17:0 (IS)	0.433875	0.397547	0.460749	0.332741	0.242859	0.230026	0.169079	0.305623		0.954376		1.00384
	121	PE(18:1)(18:1)	C41H78O8N1P1	743.547	DEA-SFC/MS/MS	[M ‒ H]‒	[Acyl FA ‒ H]‒	742.55 > 281.25			9.21702	2.17341e+06	2.46896e+06	1.09311e+06	2.50525e+06	4.53221e+06	3.16261e+06	2.2638e+06	5.54489e+06		PE 17:0_17:0 (IS)	0.0146849	0.0148494	0.00923459	0.0135471	0.024746	0.0134133	0.0085931	0.0275111		0.771361		0.946143
	122	PE(18:1)(18:2)	C41H76O8N1P1	741.531	DEA-SFC/MS/MS	[M ‒ H]‒	[Acyl FA ‒ H]‒	740.5 > 281.25	740.5 > 279.25		9.31368	3.00605e+06	2.99286e+06	2.37828e+06	1.90783e+06	2.26104e+06	2.51533e+06	2.25174e+06	3.42421e+06		PE 17:0_17:0 (IS)	0.0203108	0.0180004	0.0200917	0.0103166	0.0123453	0.0106681	0.00854735	0.0169893		0.793717		1.10964
	123	PE(18:1)(20:0)	C43H84O8N1P1	773.593	DEA-SFC/MS/MS	[M ‒ H]‒	[Acyl FA ‒ H]‒	772.6 > 281.25	772.6 > 311.3		9.09515	33907.3	52470.6	28129.6	45019.6	154178	57908.2	21025.4	200822		PE 17:0_17:0 (IS)	0.000229099	0.000315582	0.000237638	0.000243442	0.000841817	0.000245602	7.98097e-05	0.000996383		0.883233		0.989676
	124	PE(18:1)(20:1)	C43H82O8N1P1	771.578	DEA-SFC/MS/MS	[M ‒ H]‒	[Acyl FA ‒ H]‒	770.55 > 281.25	770.55 > 309.3		9.19502	265558	285050	160648	175436	243252	236083	184270	249252		PE 17:0_17:0 (IS)	0.00179428	0.00171442	0.00135716	0.000948666	0.00132816	0.00100128	0.000699467	0.00123667		0.657173		0.831157
	125	PE(18:1)(20:4)	C43H76O8N1P1	765.531	DEA-SFC/MS/MS	[M ‒ H]‒	[Acyl FA ‒ H]‒	764.5 > 281.25	764.5 > 303.25		9.34628	1.15261e+06	1.16345e+06	898776	836818	1.60778e+06	2.13066e+06	2.0889e+06	1.94171e+06		PE 17:0_17:0 (IS)	0.00778777	0.0069975	0.00759285	0.00452508	0.00877851	0.0090366	0.00792919	0.00963381		0.819595		0.985849
	126	PE(18:1)(22:0)	C45H88O8N1P1	801.625	DEA-SFC/MS/MS	[M ‒ H]‒	[Acyl FA ‒ H]‒	800.6 > 281.25	800.6 > 339.35		9.05815	109481	129533	75986.4	125069	237035	161920	66597.1	434843		PE 17:0_17:0 (IS)	0.000739722	0.000779072	0.000641933	0.000676308	0.00129422	0.000686738	0.000252795	0.00215748		0.867952		1.21672
	127	PE(18:1)(22:6)	C45H76O8N1P1	789.531	DEA-SFC/MS/MS	[M ‒ H]‒	[Acyl FA ‒ H]‒	788.5 > 281.25	788.5 > 327.25		9.48072	17270805	1.82592e+07	14314810	1.43026e+07	14358994	2.0457e+07	1.97747e+07	18268714		PE 17:0_17:0 (IS)	0.116692	0.109819	0.120931	0.0773411	0.0784004	0.0867629	0.0750625	0.0906405		0.87533		1.00327
	128	PE(18:1)(24:0)	C47H92O8N1P1	829.656	DEA-SFC/MS/MS	[M ‒ H]‒	[Acyl FA ‒ H]‒	828.65 > 281.25	828.65 > 367.35		9.01478	274967	267032	115244	286748	721635	320483	165204	1.1758e+06		PE 17:0_17:0 (IS)	0.00185785	0.00160605	0.000973579	0.00155058	0.00394014	0.00135924	0.000627093	0.00583376		0.728705		1.21917
	129	PE(18:2)(18:2)	C41H74O8N1P1	739.515	DEA-SFC/MS/MS	[M ‒ H]‒	[Acyl FA ‒ H]‒	738.5 > 279.25			9.41122	547700	528004	605051	328001	402823	411730	441672	721022		PE 17:0_17:0 (IS)	0.00370061	0.00317565	0.00511147	0.00177366	0.00219942	0.00174624	0.00167653	0.00357737		1.00129		1.33156
	130	PE(18:2)(20:0)	C43H82O8N1P1	771.578	DEA-SFC/MS/MS	[M ‒ H]‒	[Acyl FA ‒ H]‒	770.55 > 279.25	770.55 > 311.3		9.18952	103597	104119	62180	62153.8	47863.8	45013.8	20262.2	58789.8		PE 17:0_17:0 (IS)	0.00069997	0.000626221	0.000525296	0.000336095	0.000261337	0.000190914	7.69129e-05	0.000291687		0.649523		0.815033
	131	PE(18:2)(20:1)	C43H80O8N1P1	769.562	DEA-SFC/MS/MS	[M ‒ H]‒	[Acyl FA ‒ H]‒	768.55 > 279.25	768.55 > 309.3		9.28798	345232	317703	214491	157011	179089	197219	153583	185984		PE 17:0_17:0 (IS)	0.00233261	0.00191081	0.00181201	0.000849032	0.000977832	0.00083645	0.000582983	0.000922764		0.627101		0.829941
	132	PE(18:2)(20:4)	C43H74O8N1P1	763.515	DEA-SFC/MS/MS	[M ‒ H]‒	[Acyl FA ‒ H]‒	762.5 > 279.25	762.5 > 303.25		9.46522	283266	279175	271734	260528	327557	362650	347200	493563		PE 17:0_17:0 (IS)	0.00191392	0.00167908	0.00229561	0.0014088	0.00178847	0.00153808	0.00131793	0.00244882		1.031		1.13233
	133	PE(18:2)(22:6)	C45H74O8N1P1	787.515	DEA-SFC/MS/MS	[M ‒ H]‒	[Acyl FA ‒ H]‒	786.5 > 279.25	786.5 > 327.25		9.56458	9.63179e+06	9.18171e+06	8616696	8461368	7.51288e+06	9.90816e+06	10089138	1.26159e+07		PE 17:0_17:0 (IS)	0.0650785	0.0552229	0.0727937	0.0457547	0.0410205	0.0420228	0.0382971	0.0625938		0.985428		1.21492
	134	PE(20:0)(20:4)	C45H82O8N1P1	795.578	DEA-SFC/MS/MS	[M ‒ H]‒	[Acyl FA ‒ H]‒	794.55 > 311.3	794.55 > 303.25		9.21862	112831	132839	92413.6	110397	53891.7	50214.5	51871	61053.8		PE 17:0_17:0 (IS)	0.000762356	0.000798951	0.000780709	0.000596968	0.00029425	0.000212971	0.000196896	0.000302919		0.882387		0.985401
	135	PE(20:0)(22:6)	C47H82O8N1P1	819.578	DEA-SFC/MS/MS	[M ‒ H]‒	[Acyl FA ‒ H]‒	818.55 > 311.3	818.55 > 327.25		9.33145	323621	314338	244364	210256	130548	114141	99371.2	149240		PE 17:0_17:0 (IS)	0.00218659	0.00189057	0.00206438	0.00113695	0.000712793	0.000484097	0.000377201	0.000740457		0.785188		0.933801
	136	PE(20:1)(20:4)	C45H80O8N1P1	793.562	DEA-SFC/MS/MS	[M ‒ H]‒	[Acyl FA ‒ H]‒	792.55 > 309.3	792.55 > 303.25		9.32085	145113	135447	88880.8	86591.2	120485	149951	116442	125095		PE 17:0_17:0 (IS)	0.000980478	0.000814637	0.000750863	0.00046824	0.000657848	0.000635975	0.000442	0.00062066		0.679123		0.821333
	137	PE(20:1)(22:6)	C47H80O8N1P1	817.562	DEA-SFC/MS/MS	[M ‒ H]‒	[Acyl FA ‒ H]‒	816.55 > 309.3	816.55 > 327.25		9.43368	733758	753131	464149	458809	520061	599238	478780	517890		PE 17:0_17:0 (IS)	0.00495773	0.00452967	0.00392113	0.002481	0.00283954	0.0025415	0.00181739	0.00256952		0.674803		0.815252
	138	PE(20:4)(20:4)	C45H74O8N1P1	787.515	DEA-SFC/MS/MS	[M ‒ H]‒	[Acyl FA ‒ H]‒	786.5 > 303.25			9.51592	18640.7	16080	n.d.	16800	n.d.	22648.1	14254.8	31168.1		PE 17:0_17:0 (IS)	0.000125949	9.67122e-05	0	9.08456e-05	0	9.60555e-05	5.41094e-05	0.000154641		0.408		2.17323
	139	PE(20:4)(22:0)	C47H86O8N1P1	823.609	DEA-SFC/MS/MS	[M ‒ H]‒	[Acyl FA ‒ H]‒	822.6 > 303.25	822.6 > 339.35		9.17195	12502.5	15264.1	n.d.	22294.9	n.d.	10912.9	15400.6	16858.4		PE 17:0_17:0 (IS)	8.4475e-05	9.18053e-05	0	0.000120559	0	4.62841e-05	5.84588e-05	8.36432e-05		0.683908		3.07021
	140	PE(20:4)(22:6)	C47H74O8N1P1	811.515	DEA-SFC/MS/MS	[M ‒ H]‒	[Acyl FA ‒ H]‒	810.5 > 303.25	810.5 > 327.25		9.62095	239641	268253	195807	253820	353159	540309	455940	608809		PE 17:0_17:0 (IS)	0.00161917	0.00161339	0.00165417	0.00137253	0.00192826	0.00229157	0.00173069	0.00302062		0.936316		1.12595
	141	PG(16:0)(16:0)	C38H75O10P1	722.51	DEA-SFC/MS/MS	[M ‒ H]‒	[Acyl FA ‒ H]‒	721.5 > 255.25			13.3299	547719	579825	308016	432689	703823	1.0677e+06	622181	1105870		PE 17:0_17:0 (IS)	0.00370074	0.00348733	0.00260212	0.00233976	0.00384289	0.00452836	0.00236172	0.00548679		0.687511		0.937556
	142	PG(16:0)(18:0)	C40H79O10P1	750.541	DEA-SFC/MS/MS	[M ‒ H]‒	[Acyl FA ‒ H]‒	749.55 > 255.25	749.55 > 283.25		13.2339	218808	249960	212789	306933	203873	318756	263378	555270		PE 17:0_17:0 (IS)	0.00147841	0.00150337	0.00179764	0.00165973	0.00111315	0.00135192	0.000999749	0.00275498		1.1595		1.52318
	143	PG(16:0)(18:1)	C40H77O10P1	748.525	DEA-SFC/MS/MS	[M ‒ H]‒	[Acyl FA ‒ H]‒	747.5 > 255.25	747.5 > 281.25		13.3556	15200058	1.65766e+07	10006773	1.05741e+07	1.27128e+07	1.69703e+07	12305834	18877557		PE 17:0_17:0 (IS)	0.102701	0.0996994	0.0845371	0.0571791	0.0694119	0.0719747	0.0467114	0.0936613		0.700177		0.99283
	144	PG(16:0)(18:2)	C40H75O10P1	746.51	DEA-SFC/MS/MS	[M ‒ H]‒	[Acyl FA ‒ H]‒	745.5 > 255.25	745.5 > 279.25		13.4625	1.75854e+06	1.90023e+06	1.22336e+06	1.23649e+06	1.42286e+06	1.74901e+06	1.46334e+06	2.78117e+06		PE 17:0_17:0 (IS)	0.0118818	0.0114288	0.0103349	0.00668631	0.00776882	0.00741797	0.00555464	0.0137988		0.730192		1.27436
	145	PG(16:0)(20:1)	C42H81O10P1	776.557	DEA-SFC/MS/MS	[M ‒ H]‒	[Acyl FA ‒ H]‒	775.55 > 255.25	775.55 > 309.3		13.2578	195077	246973	155364	140262	121848	181670	122294	173834		PE 17:0_17:0 (IS)	0.00131807	0.00148541	0.00131251	0.000758463	0.000665294	0.000770502	0.000464212	0.000862483		0.738717		0.924014
	146	PG(16:0)(22:6)	C44H75O10P1	794.51	DEA-SFC/MS/MS	[M ‒ H]‒	[Acyl FA ‒ H]‒	793.5 > 255.25	793.5 > 327.25		13.6675	87656.4	107014	69807.1	104268	67051.3	107905	83103.8	151311		PE 17:0_17:0 (IS)	0.000592262	0.000643629	0.00058973	0.000563828	0.000366102	0.00045765	0.000315452	0.00075073		0.933381		1.2943
	147	PG(18:0)(18:1)	C42H81O10P1	776.557	DEA-SFC/MS/MS	[M ‒ H]‒	[Acyl FA ‒ H]‒	775.55 > 283.25	775.55 > 281.25		13.2538	356994	437485	318657	431483	391239	617290	498055	783296		PE 17:0_17:0 (IS)	0.00241208	0.00263123	0.00269201	0.00233323	0.00213617	0.00261807	0.00189055	0.00388634		0.996418		1.2151
	148	PG(18:0)(18:2)	C42H79O10P1	774.541	DEA-SFC/MS/MS	[M ‒ H]‒	[Acyl FA ‒ H]‒	773.55 > 283.25	773.55 > 279.25		13.3649	495257	607264	580869	615165	345413	444912	426255	890368		PE 17:0_17:0 (IS)	0.00334627	0.00365236	0.00490718	0.00332649	0.00188596	0.00188697	0.00161801	0.00441758		1.17647		1.59971
	149	PG(18:0)(22:6)	C46H79O10P1	822.541	DEA-SFC/MS/MS	[M ‒ H]‒	[Acyl FA ‒ H]‒	821.55 > 283.25	821.55 > 327.25		13.5463	198319	251951	178862	277320	108411	163328	141694	278595		PE 17:0_17:0 (IS)	0.00133997	0.00151535	0.00151103	0.0014996	0.000591926	0.000692711	0.000537855	0.00138225		1.05439		1.49467
	150	PG(18:1)(18:1)	C42H79O10P1	774.541	DEA-SFC/MS/MS	[M ‒ H]‒	[Acyl FA ‒ H]‒	773.55 > 281.25			13.0174	127507	175856	69604.3	143947	128526	183831	151673	239577		PE 17:0_17:0 (IS)	0.000861519	0.00105768	0.000588016	0.000778393	0.000701752	0.000779667	0.00057573	0.00118867		0.71197		1.19102
	151	PG(18:1)(18:2)	C42H77O10P1	772.525	DEA-SFC/MS/MS	[M ‒ H]‒	[Acyl FA ‒ H]‒	771.5 > 281.25	771.5 > 279.25		13.1497	348262	498171	248357	395285	235291	351448	422393	684176		PE 17:0_17:0 (IS)	0.00235308	0.00299622	0.00209812	0.0021375	0.00128469	0.00149057	0.00160335	0.00339455		0.791807		1.80087
	152	PG(18:1)(20:4)	C44H77O10P1	796.525	DEA-SFC/MS/MS	[M ‒ H]‒	[Acyl FA ‒ H]‒	795.5 > 281.25	795.5 > 303.25		13.2096	n.d.	n.d.	9708.94	n.d.	10168.3	15404.3	32365.8	31984.8		PE 17:0_17:0 (IS)	0	0	8.2021e-05	0	5.55191e-05	6.5333e-05	0.000122857	0.000158693		#DIV/0!		2.32971
	153	PG(18:1)(22:6)	C46H77O10P1	820.525	DEA-SFC/MS/MS	[M ‒ H]‒	[Acyl FA ‒ H]‒	819.5 > 281.25	819.5 > 327.25		13.3441	128088	128428	108015	85811.3	123831	140925	136084	120605		PE 17:0_17:0 (IS)	0.000865442	0.000772423	0.000912512	0.000464023	0.000676119	0.000597696	0.000516556	0.000598383		0.840445		0.875276
	154	PG(18:2)(18:2)	C42H75O10P1	770.51	DEA-SFC/MS/MS	[M ‒ H]‒	[Acyl FA ‒ H]‒	769.5 > 279.25			13.2909	217579	348886	232729	325695	124151	201667	264383	475689		PE 17:0_17:0 (IS)	0.0014701	0.00209836	0.00196609	0.00176119	0.000677866	0.000855317	0.00100357	0.00236014		1.04451		2.19394
	155	PG(18:2)(20:4)	C44H75O10P1	794.51	DEA-SFC/MS/MS	[M ‒ H]‒	[Acyl FA ‒ H]‒	793.5 > 279.25	793.5 > 303.25		13.3571	11553.2	17568.2	19111.7	14297.4	14167.7	16343.7	46982.7	55304		PE 17:0_17:0 (IS)	7.80609e-05	0.000105663	0.000161456	7.73127e-05	7.73558e-05	6.93173e-05	0.00017834	0.000274392		1.2996		3.08667
	156	PG(18:2)(22:6)	C46H75O10P1	818.51	DEA-SFC/MS/MS	[M ‒ H]‒	[Acyl FA ‒ H]‒	817.5 > 279.25	817.5 > 327.25		13.4938	132754	155794	145155	120703	106003	128538	139344	168015		PE 17:0_17:0 (IS)	0.000896972	0.000937016	0.00122627	0.000652698	0.000578781	0.000545157	0.000528932	0.00083361		1.02452		1.21229
	157	PG(20:4)(22:6)	C48H75O10P1	842.51	DEA-SFC/MS/MS	[M ‒ H]‒	[Acyl FA ‒ H]‒	841.5 > 303.25	841.5 > 327.25		13.5643	n.d.	n.d.	n.d.	n.d.	n.d.	n.d.	14832.5	n.d.		PE 17:0_17:0 (IS)	0	0	0	0	0	0	5.63024e-05	0		#DIV/0!		#DIV/0!
	158	PG(22:6)(22:6)	C50H75O10P1	866.51	DEA-SFC/MS/MS	[M ‒ H]‒	[Acyl FA ‒ H]‒	865.5 > 327.25			13.7116	39881.9	48569.2	32805.9	39310.1	37871.3	36240.6	36240.1	43145.4		PE 17:0_17:0 (IS)	0.000269467	0.000292117	0.000277144	0.000212569	0.000206778	0.000153705	0.000137563	0.000214067		0.872019		0.975441
	159	PI(16:0)(16:0)	C41H79O13P1	810.526	DEA-SFC/MS/MS	[M ‒ H]‒	[Acyl FA ‒ H]‒	809.5 > 255.25			17.4888	353732	357821	185912	185790	310947	445473	280880	243636		PE 17:0_17:0 (IS)	0.00239004	0.0021521	0.00157058	0.00100466	0.00169778	0.00188935	0.00106619	0.00120881		0.566966		0.63421
	160	PI(16:0)(18:0)	C43H83O13P1	838.557	DEA-SFC/MS/MS	[M ‒ H]‒	[Acyl FA ‒ H]‒	837.55 > 255.25	837.55 > 283.25		17.3557	4.02657e+06	3.93245e+06	2.77077e+06	2.83402e+06	3.01416e+06	3.7594e+06	2.62358e+06	4.09658e+06		PE 17:0_17:0 (IS)	0.0272061	0.0236515	0.0234074	0.0153249	0.0164574	0.0159445	0.00995878	0.0203253		0.761584		0.93464
	161	PI(16:0)(18:1)	C43H81O13P1	836.541	DEA-SFC/MS/MS	[M ‒ H]‒	[Acyl FA ‒ H]‒	835.55 > 255.25	835.55 > 281.25		17.4386	1.31111e+06	1.48197e+06	893200	943616	1.47775e+06	1.84556e+06	1.57776e+06	1.72814e+06		PE 17:0_17:0 (IS)	0.0088587	0.00891325	0.00754574	0.00510258	0.00806855	0.00782742	0.00598898	0.00857422		0.711702		0.916157
	162	PI(16:0)(18:2)	C43H79O13P1	834.526	DEA-SFC/MS/MS	[M ‒ H]‒	[Acyl FA ‒ H]‒	833.5 > 255.25	833.5 > 279.25		17.5575	571538	560827	420969	451575	405003	593938	626663	628114		PE 17:0_17:0 (IS)	0.00386167	0.00337307	0.00355634	0.00244188	0.00221133	0.00251903	0.00237873	0.0031164		0.829086		1.16167
	163	PI(16:0)(20:4)	C45H79O13P1	858.526	DEA-SFC/MS/MS	[M ‒ H]‒	[Acyl FA ‒ H]‒	857.5 > 255.25	857.5 > 303.25		17.5973	724438	730873	401567	514215	729896	1.09333e+06	912370	796759		PE 17:0_17:0 (IS)	0.00489476	0.0043958	0.00339243	0.00278061	0.00398525	0.00463706	0.00346324	0.00395314		0.664442		0.860138
	164	PI(16:0)(22:6)	C47H79O13P1	882.526	DEA-SFC/MS/MS	[M ‒ H]‒	[Acyl FA ‒ H]‒	881.5 > 255.25	881.5 > 327.25		17.6802	427992	449323	308249	349782	594442	1.03182e+06	862584	871968		PE 17:0_17:0 (IS)	0.00289179	0.00270243	0.00260409	0.00189144	0.00324567	0.00437619	0.00327426	0.00432629		0.803601		0.997205
	165	PI(18:0)(18:1)	C45H85O13P1	864.573	DEA-SFC/MS/MS	[M ‒ H]‒	[Acyl FA ‒ H]‒	863.55 > 283.25	863.55 > 281.25		17.3383	669605	672351	826340	1.03791e+06	975940	1.2136e+06	1.11829e+06	1.59432e+06		PE 17:0_17:0 (IS)	0.00452427	0.00404382	0.00698091	0.00561249	0.00532865	0.00514714	0.00424489	0.00791024		1.4698		1.16031
	166	PI(18:0)(18:2)	C45H83O13P1	862.557	DEA-SFC/MS/MS	[M ‒ H]‒	[Acyl FA ‒ H]‒	861.55 > 283.25	861.55 > 279.25		17.4141	8.94146e+06	9330682	8907866	9.3942e+06	2.83993e+06	3479045	3.9382e+06	5.21959e+06		PE 17:0_17:0 (IS)	0.0604142	0.0561189	0.0752535	0.0507989	0.0155061	0.0147554	0.0149489	0.0258971		1.08169		1.34977
	167	PI(18:0)(20:4)	C47H83O13P1	886.557	DEA-SFC/MS/MS	[M ‒ H]‒	[Acyl FA ‒ H]‒	885.55 > 283.25	885.55 > 303.25		17.461	18958375	21381220	1.42692e+07	18229627	26804306	40849441	40435100	38555123		PE 17:0_17:0 (IS)	0.128095	0.128596	0.120546	0.0985763	0.146352	0.173252	0.153487	0.191292		0.853641		1.07877
	168	PI(18:0)(22:6)	C49H83O13P1	910.557	DEA-SFC/MS/MS	[M ‒ H]‒	[Acyl FA ‒ H]‒	909.55 > 283.25	909.55 > 327.25		17.5511	7.82011e+06	8.80375e+06	8.0254e+06	1.06509e+07	8.11766e+06	1.37177e+07	1.30621e+07	15560749		PE 17:0_17:0 (IS)	0.0528376	0.0529497	0.0677985	0.0575944	0.0443226	0.0581798	0.0495822	0.0772049		1.18533		1.23692
	169	PI(18:1)(18:1)	C45H83O13P1	862.557	DEA-SFC/MS/MS	[M ‒ H]‒	[Acyl FA ‒ H]‒	861.55 > 281.25			17.4145	233807	217856	168469	214889	217357	274725	253324	323268		PE 17:0_17:0 (IS)	0.00157975	0.00131029	0.00142322	0.00116201	0.00118677	0.00116517	0.000961588	0.0016039		0.894533		1.09079
	170	PI(18:1)(18:2)	C45H81O13P1	860.541	DEA-SFC/MS/MS	[M ‒ H]‒	[Acyl FA ‒ H]‒	859.55 > 281.25	859.55 > 279.25		17.5369	799291	791978	641477	759447	453616	482293	589165	808640		PE 17:0_17:0 (IS)	0.00540052	0.00476331	0.00541919	0.00410669	0.00247675	0.00204551	0.0022364	0.00401208		0.937234		1.38171
	171	PI(18:1)(20:4)	C47H81O13P1	884.541	DEA-SFC/MS/MS	[M ‒ H]‒	[Acyl FA ‒ H]‒	883.55 > 281.25	883.55 > 303.25		17.5839	911244	955808	548290	728276	1.25098e+06	1.93115e+06	2.01453e+06	1.8865e+06		PE 17:0_17:0 (IS)	0.00615694	0.00574866	0.00463195	0.00393813	0.00683036	0.00819043	0.0076469	0.0093599		0.719836		1.13222
	172	PI(18:1)(22:6)	C49H81O13P1	908.541	DEA-SFC/MS/MS	[M ‒ H]‒	[Acyl FA ‒ H]‒	907.55 > 281.25	907.55 > 327.25		17.6596	288826	318531	230336	327537	388412	620914	633009	703529		PE 17:0_17:0 (IS)	0.00195149	0.00191579	0.00194588	0.00177115	0.00212074	0.00263344	0.00240283	0.00349057		0.961147		1.23963
	173	PI(18:2)(18:2)	C45H79O13P1	858.526	DEA-SFC/MS/MS	[M ‒ H]‒	[Acyl FA ‒ H]‒	857.5 > 279.25			17.6633	72930.3	71333.4	85936.2	124093	47264.4	48974.7	100795	129848		PE 17:0_17:0 (IS)	0.000492763	0.000429031	0.000725988	0.000671028	0.000258064	0.000207713	0.000382606	0.000644244		1.51554		2.2046
	174	PI(18:2)(20:4)	C47H79O13P1	882.526	DEA-SFC/MS/MS	[M ‒ H]‒	[Acyl FA ‒ H]‒	881.5 > 279.25	881.5 > 303.25		17.7033	48511.2	40292.9	28086.7	73818.7	63105.1	98698.1	147743	146136		PE 17:0_17:0 (IS)	0.000327772	0.00024234	0.000237276	0.000399173	0.000344555	0.000418601	0.000560815	0.000725055		1.11636		1.68494
	175	PI(20:0)(20:4)	C49H87O13P1	914.588	DEA-SFC/MS/MS	[M ‒ H]‒	[Acyl FA ‒ H]‒	913.6 > 311.3	913.6 > 303.25		17.347	41111.1	42550.4	12842.3	24319.6	14738.8	29596.6	n.d.	36419.9		PE 17:0_17:0 (IS)	0.000277773	0.000255917	0.000108491	0.000131508	8.04739e-05	0.000125526	0	0.000180698		0.449698		0.877174
	176	PS(16:0)(20:4)	C42H74O10N1P1	783.505	DEA-SFC/MS/MS	[M ‒ H]‒	[Acyl FA ‒ H]‒	782.5 > 255.25	782.5 > 303.25		18.0743	n.d.	n.d.	n.d.	n.d.	n.d.	n.d.	n.d.	n.d.		PE 17:0_17:0 (IS)	0	0	0	0	0	0	0	0		#DIV/0!		#DIV/0!
	177	PS(16:0)(22:6)	C44H74O10N1P1	807.505	DEA-SFC/MS/MS	[M ‒ H]‒	[Acyl FA ‒ H]‒	806.5 > 255.25	806.5 > 327.25		18.1573	98516.3	111369	34323.3	57950.9	171249	n.d.	166198	n.d.		PE 17:0_17:0 (IS)	0.000665638	0.000669825	0.000289963	0.000313368	0.000935025	0	0.000630866	0		0.451777		0.674705
	178	PS(18:0)(18:1)	C42H80O10N1P1	789.552	DEA-SFC/MS/MS	[M ‒ H]‒	[Acyl FA ‒ H]‒	788.55 > 283.25	788.55 > 281.25		17.7326	1.78337e+06	1.53619e+06	983269	1.48369e+06	3908977	2.56577e+06	2.00099e+06	5.64236e+06		PE 17:0_17:0 (IS)	0.0120496	0.00923931	0.00830664	0.00802303	0.0213431	0.010882	0.0075955	0.0279947		0.767052		1.10442
	179	PS(18:0)(18:2)	C42H78O10N1P1	787.536	DEA-SFC/MS/MS	[M ‒ H]‒	[Acyl FA ‒ H]‒	786.55 > 283.25	786.55 > 279.25		17.8803	551420	446345	412896	717190	351938	306657	461257	752718		PE 17:0_17:0 (IS)	0.00372574	0.00268452	0.00348814	0.00387819	0.00192159	0.0013006	0.00175087	0.00373462		1.14915		1.70241
	180	PS(18:0)(20:4)	C44H78O10N1P1	811.536	DEA-SFC/MS/MS	[M ‒ H]‒	[Acyl FA ‒ H]‒	810.55 > 283.25	810.55 > 303.25		17.9093	431128	495230	443301	593212	217405	390917	510773	543633		PE 17:0_17:0 (IS)	0.00291298	0.00297854	0.003745	0.00320778	0.00118703	0.00165797	0.00193883	0.00269724		1.18013		1.62955
	181	PS(18:0)(22:6)	C46H78O10N1P1	835.536	DEA-SFC/MS/MS	[M ‒ H]‒	[Acyl FA ‒ H]‒	834.55 > 283.25	834.55 > 327.25		18.0174	7.48967e+06	8.43945e+06	6.06897e+06	5.72009e+06	8.05908e+06	1.37637e+07	1.25814e+07	1.43738e+07		PE 17:0_17:0 (IS)	0.0506049	0.0507587	0.0512706	0.0309313	0.0440027	0.058375	0.0477574	0.0713156		0.81096		1.16308
	182	PS(18:1)(18:1)	C42H78O10N1P1	787.536	DEA-SFC/MS/MS	[M ‒ H]‒	[Acyl FA ‒ H]‒	786.55 > 281.25			17.8339	n.d.	191431	122252	128770	586727	n.d.	220531	672824		PE 17:0_17:0 (IS)	0	0.00115135	0.00103279	0.00069632	0.00320354	0	0.000837108	0.00333823		1.50181		1.30335
	183	PS(18:1)(20:0)	C44H84O10N1P1	817.583	DEA-SFC/MS/MS	[M ‒ H]‒	[Acyl FA ‒ H]‒	816.6 > 281.25	816.6 > 311.3		17.6612	46892.1	58774.7	21500.4	27323.6	131983	88881.1	34601	246698		PE 17:0_17:0 (IS)	0.000316833	0.000353497	0.000181635	0.000147752	0.000720629	0.000376965	0.000131341	0.001224		0.49138		1.23483
	184	PS(18:1)(24:0)	C48H92O10N1P1	873.646	DEA-SFC/MS/MS	[M ‒ H]‒	[Acyl FA ‒ H]‒	872.65 > 281.25	872.65 > 367.35		17.3301	186282	203685	96217.1	159909	192920	80406.1	141212	904331		PE 17:0_17:0 (IS)	0.00125864	0.00122506	0.000812841	0.000864704	0.00105335	0.00034102	0.000536025	0.00448685		0.675422		3.60226
	185	SM(d18:1)(16:0)	C39H79O6N2P1	702.568	DEA-SFC/MS/MS	[M + H]+	[C5H15O4NP]+	703.55 > 184.05			8.18927	1.01571e+08	1.00192e+08	9.25764e+07	1.0491e+08	9.44656e+07	1.03551e+08	1.12129e+08	1.20812e+08		SM d18:1_17:0 (IS)	1.1795	1.02329	1.48886	1.0475	0.689191	0.502317	0.493718	0.576294		1.15144		0.898031
	186	SM(d18:1)(18:0)	C41H83O6N2P1	730.599	DEA-SFC/MS/MS	[M + H]+	[C5H15O4NP]+	731.6 > 184.05			8.14253	6.08313e+07	6.96153e+07	5.58751e+07	7.3126e+07	1.25423e+08	1.475e+08	1.56906e+08	1.49737e+08		SM d18:1_17:0 (IS)	0.706405	0.711003	0.898613	0.730145	0.915049	0.715509	0.690877	0.714276		1.14911		0.861762
	187	SM(d18:1)(18:1)	C41H81O6N2P1	728.583	DEA-SFC/MS/MS	[M + H]+	[C5H15O4NP]+	729.6 > 184.05			8.2245	2.84171e+06	3.52952e+06	2.65305e+06	3.50103e+06	7.15122e+06	1.22136e+07	1.27076e+07	1.29114e+07		SM d18:1_17:0 (IS)	0.0329995	0.0360481	0.0426678	0.0349569	0.0521731	0.0592471	0.0559534	0.0615899		1.12422		1.05496
	188	SM(d18:1)(18:2)	C41H79O6N2P1	726.568	DEA-SFC/MS/MS	[M + H]+	[C5H15O4NP]+	727.55 > 184.05			8.27137	154768	66320	96870.3	159846	164165	243999	315139	360725		SM d18:1_17:0 (IS)	0.00179725	0.000677346	0.00155792	0.00159603	0.0011977	0.00118361	0.0013876	0.00172073		1.27453		1.3053
	189	SM(d18:1)(20:0)	C43H87O6N2P1	758.63	DEA-SFC/MS/MS	[M + H]+	[C5H15O4NP]+	759.65 > 184.05			8.11933	1.40365e+07	1.67967e+07	1.25337e+07	1.40556e+07	2.35e+07	2.07741e+07	1.63769e+07	3.56568e+07		SM d18:1_17:0 (IS)	0.163	0.17155	0.201573	0.140342	0.171448	0.100773	0.0721098	0.17009		1.02202		0.889715
	190	SM(d18:1)(20:1)	C43H85O6N2P1	756.615	DEA-SFC/MS/MS	[M + H]+	[C5H15O4NP]+	757.6 > 184.05			8.1896	1.49732e+06	1.75859e+06	1.31763e+06	1.26532e+06	1.83834e+06	1.80067e+06	1.66901e+06	2.37764e+06		SM d18:1_17:0 (IS)	0.0173876	0.017961	0.0211908	0.0126339	0.013412	0.00873487	0.00734889	0.0113418		0.956885		0.843944
	191	SM(d18:1)(22:0)	C45H91O6N2P1	786.661	DEA-SFC/MS/MS	[M + H]+	[C5H15O4NP]+	787.65 > 184.05			8.09607	4.76367e+07	5.15518e+07	3.46074e+07	4.43722e+07	4.07191e+07	3.51622e+07	2.84404e+07	6.10637e+07		SM d18:1_17:0 (IS)	0.553183	0.526515	0.556575	0.443045	0.297074	0.170568	0.125227	0.291285		0.925833		0.890665
	192	SM(d18:1)(22:6)	C45H79O6N2P1	774.568	DEA-SFC/MS/MS	[M + H]+	[C5H15O4NP]+	775.55 > 184.05			8.10783	422543	571701	355365	345650	271795	324846	265230	360765		SM d18:1_17:0 (IS)	0.00490679	0.00583896	0.00571517	0.00345123	0.00198293	0.0015758	0.00116784	0.00172092		0.853026		0.81174
	193	SM(d18:1)(24:0)	C47H95O6N2P1	814.693	DEA-SFC/MS/MS	[M + H]+	[C5H15O4NP]+	815.7 > 184.05			8.0611	4.34251e+07	5.74979e+07	3.54148e+07	4.89219e+07	6.53152e+07	4.16136e+07	3.11629e+07	8.90383e+07		SM d18:1_17:0 (IS)	0.504275	0.587243	0.569559	0.488472	0.476519	0.201863	0.137214	0.424729		0.969321		0.828359
	194	SM(d18:1)(26:0)	C49H99O6N2P1	842.724	DEA-SFC/MS/MS	[M + H]+	[C5H15O4NP]+	843.75 > 184.05			8.04947	187053	175577	153110	223461	313793	196015	148431	590961		SM d18:1_17:0 (IS)	0.00217216	0.00179322	0.0024624	0.0022312	0.00228933	0.000950848	0.00065356	0.00281899		1.18365		1.07172
	195	SM(d18:1)(28:0)	C51H103O6N2P1	870.755	DEA-SFC/MS/MS	[M + H]+	[C5H15O4NP]+	871.75 > 184.05			8.15483	480331	501899	368083	480248	494783	322606	333317	613937		SM d18:1_17:0 (IS)	0.00557786	0.00512605	0.00591971	0.00479516	0.00360978	0.00156493	0.00146764	0.0029286		1.00102		0.849562
	196	CE(18:1)	C45H78O2	650.6	C18 column-SFC/MS/MS	[M + NH4]+	[M + H ‒ Acyl FA]+	668.65 > 369.35			9.08067	156599	195846	226842	274204	173320	224471	209599	256346		DG 12:0_12:0 (IS)	0.000585897	0.000606239	0.00108053	0.000887648	0.000468507	0.000488899	0.000425913	0.000556436		1.65097		1.02605
	197	CE(18:2)	C45H76O2	648.585	C18 column-SFC/MS/MS	[M + NH4]+	[M + H ‒ Acyl FA]+	666.6 > 369.35			8.91173	2.25447e+06	3.49511e+06	4.96154e+06	2.67843e+06	1.25962e+06	3137628	5162952	3615609		DG 12:0_12:0 (IS)	0.00843485	0.0108191	0.0236336	0.00867057	0.00340493	0.00683378	0.0104913	0.0078482		1.6778		1.7912
	198	CE(20:4)	C47H76O2	672.585	C18 column-SFC/MS/MS	[M + NH4]+	[M + H ‒ Acyl FA]+	690.6 > 369.35			9.047	1.24202e+06	2.39374e+06	3.29607e+06	1.46455e+06	669059	2136483	3.0504e+06	2.57636e+06		DG 12:0_12:0 (IS)	0.00464689	0.0074098	0.0157004	0.004741	0.00180855	0.00465328	0.00619854	0.00559236		1.69544		1.8247
	199	CE(22:6)	C49H76O2	696.585	C18 column-SFC/MS/MS	[M + NH4]+	[M + H ‒ Acyl FA]+	714.6 > 369.35			9.24987	674958	980555	1.22782e+06	561201	557977	1190434	1.15575e+06	793284		DG 12:0_12:0 (IS)	0.00252528	0.0030353	0.00584856	0.00181671	0.00150828	0.00259277	0.00234853	0.00172194		1.3785		0.992541
	200	TG(16:0)(16:0)(16:0)	C51H98O6	806.736	C18 column-SFC/MS/MS	[M + NH4]+	[M + H ‒ Acyl FA]+	824.75 > 551.5			8.07827	25032508	30155296	30330700	19485332	33077890	38306200	25480544	48765164		DG 12:0_12:0 (IS)	0.0936563	0.0933453	0.144476	0.0630775	0.0894138	0.0834312	0.0517775	0.105852		1.1099		0.91197
	201	TG(16:0)(16:0)(18:1)	C53H100O6	832.752	C18 column-SFC/MS/MS	[M + NH4]+	[M + H ‒ Acyl FA]+	850.8 > 577.5	850.8 > 551.5		8.27	43222784	44134604	44786328	35159660	43026364	42549248	44901456	57560880		DG 12:0_12:0 (IS)	0.161713	0.136618	0.213334	0.113818	0.116306	0.0926726	0.0912416	0.124944		1.09661		1.03449
	202	TG(16:0)(16:0)(18:2)	C53H98O6	830.736	C18 column-SFC/MS/MS	[M + NH4]+	[M + H ‒ Acyl FA]+	848.75 > 575.5	848.75 > 551.5		8.1462	48985760	55858848	61153216	50723804	64112124	64440024	47113540	73856728		DG 12:0_12:0 (IS)	0.183275	0.17291	0.291295	0.164202	0.173303	0.140351	0.0957366	0.160317		1.27882		0.816356
	203	TG(16:0)(16:0)(20:1)	C55H104O6	860.783	C18 column-SFC/MS/MS	[M + NH4]+	[M + H ‒ Acyl FA]+	878.8 > 605.55	878.8 > 551.5		8.6646	639445	907435	834515	672102	725352	1.5314e+06	1.53001e+06	1.92655e+06		DG 12:0_12:0 (IS)	0.00239241	0.00280895	0.0039751	0.00217572	0.00196072	0.00333541	0.00310904	0.00418186		1.18254		1.37665
	204	TG(16:0)(16:0)(20:4)	C55H98O6	854.736	C18 column-SFC/MS/MS	[M + NH4]+	[M + H ‒ Acyl FA]+	872.75 > 599.5	872.75 > 551.5		8.2366	846398	1.61152e+06	1.54102e+06	879892	847205	1.15301e+06	1.4557e+06	1.67204e+06		DG 12:0_12:0 (IS)	0.0031667	0.00498844	0.00734044	0.00284837	0.0022901	0.00251127	0.00295804	0.0036294		1.24937		1.37199
	205	TG(16:0)(16:0)(22:6)	C57H98O6	878.736	C18 column-SFC/MS/MS	[M + NH4]+	[M + H ‒ Acyl FA]+	896.75 > 623.5	896.75 > 551.5		8.3946	2.18245e+06	3.18971e+06	3412074	2.51207e+06	2115748	2.7628e+06	3.40064e+06	5456095		DG 12:0_12:0 (IS)	0.00816539	0.00987371	0.016253	0.00813204	0.00571914	0.0060174	0.00691023	0.0118432		1.35179		1.59787
	206	TG(16:0)(18:0)(18:0)	C55H106O6	862.799	C18 column-SFC/MS/MS	[M + NH4]+	[M + H ‒ Acyl FA]+	880.85 > 607.55	880.85 > 579.55		8.6426	479808	557517	793811	471328	669922	739081	679503	1.36342e+06		DG 12:0_12:0 (IS)	0.00179515	0.00172579	0.00378121	0.00152578	0.00181089	0.00160972	0.00138078	0.00295951		1.50727		1.26886
	207	TG(16:0)(18:0)(18:1)	C55H104O6	860.783	C18 column-SFC/MS/MS	[M + NH4]+	[M + H ‒ Acyl FA]+	878.8 > 605.55	878.8 > 577.5	878.8 > 579.55	8.64273	5015990	5.31153e+06	7155010	5594794	7098548	8387025	8329825	18524122		DG 12:0_12:0 (IS)	0.0187668	0.0164418	0.0340819	0.0181114	0.0191883	0.018267	0.0169265	0.0402093		1.4824		1.52544
	208	TG(16:0)(18:0)(18:2)	C55H102O6	858.768	C18 column-SFC/MS/MS	[M + NH4]+	[M + H ‒ Acyl FA]+	876.8 > 603.55	876.8 > 575.5		8.33873	13150538	14126740	16098168	13587261	15338606	13320644	10731768	15974136		DG 12:0_12:0 (IS)	0.0492013	0.0437291	0.0766815	0.0439844	0.0414622	0.0290125	0.0218074	0.0346742		1.29845		0.801445
	209	TG(16:0)(18:0)(20:1)	C57H108O6	888.815	C18 column-SFC/MS/MS	[M + NH4]+	[M + H ‒ Acyl FA]+	906.85 > 633.6	906.85 > 605.55	906.85 > 579.55	9.06	131451	95750	327092	112375	192169	253129	371497	562459		DG 12:0_12:0 (IS)	0.000491808	0.000296393	0.00155806	0.000363777	0.000519456	0.000551317	0.000754897	0.0012209		2.43826		1.8452
	210	TG(16:0)(18:0)(20:4)	C57H102O6	882.768	C18 column-SFC/MS/MS	[M + NH4]+	[M + H ‒ Acyl FA]+	900.8 > 627.55	900.8 > 599.5		8.60953	137122	237313	351050	213855	126077	193090	729270	1.10983e+06		DG 12:0_12:0 (IS)	0.000513027	0.000734599	0.00167218	0.000692286	0.000340803	0.000420551	0.00148191	0.00240905		1.89517		5.11057
	211	TG(16:0)(18:1)(18:1)	C55H102O6	858.768	C18 column-SFC/MS/MS	[M + NH4]+	[M + H ‒ Acyl FA]+	876.8 > 603.55	876.8 > 577.5		8.46327	49664384	52369408	53073504	53554048	60011152	48324676	56266312	65231384		DG 12:0_12:0 (IS)	0.185814	0.162109	0.252809	0.173364	0.162218	0.105252	0.114335	0.141594		1.22491		0.956856
	212	TG(16:0)(18:1)(18:2)	C55H100O6	856.752	C18 column-SFC/MS/MS	[M + NH4]+	[M + H ‒ Acyl FA]+	874.8 > 601.5	874.8 > 575.5	874.8 > 577.5	8.33947	71218784	71458576	78448472	68031896	64213380	75393008	66083016	81331528		DG 12:0_12:0 (IS)	0.266457	0.221199	0.373679	0.220232	0.173577	0.164207	0.134283	0.176542		1.21789		0.920191
	213	TG(16:0)(18:1)(20:0)	C57H108O6	888.815	C18 column-SFC/MS/MS	[M + NH4]+	[M + H ‒ Acyl FA]+	906.85 > 633.6	906.85 > 607.55		9.06073	235993	206024	528135	345741	264498	435878	315526	592750		DG 12:0_12:0 (IS)	0.00088294	0.000637745	0.0025157	0.00111923	0.000714973	0.000949344	0.000641162	0.00128665		2.39032		1.15832
	214	TG(16:0)(18:1)(20:1)	C57H106O6	886.799	C18 column-SFC/MS/MS	[M + NH4]+	[M + H ‒ Acyl FA]+	904.85 > 631.55	904.85 > 605.55	904.85 > 577.5	8.84687	5.65767e+06	5933358	8394980	6063105	5.15977e+06	6803863	6.78803e+06	11496962		DG 12:0_12:0 (IS)	0.0211676	0.0183666	0.0399884	0.0196274	0.0139475	0.0148189	0.0137936	0.0249558		1.50795		1.34704
	215	TG(16:0)(18:1)(20:4)	C57H100O6	880.752	C18 column-SFC/MS/MS	[M + NH4]+	[M + H ‒ Acyl FA]+	898.8 > 625.5	898.8 > 599.5		8.41893	3390306	4085295	3.67603e+06	3.08479e+06	2.37465e+06	3.08249e+06	3.65378e+06	4946676		DG 12:0_12:0 (IS)	0.0126845	0.012646	0.0175103	0.00998603	0.00641899	0.00671369	0.00742463	0.0107375		1.0855		1.38297
	216	TG(16:0)(18:1)(22:6)	C59H100O6	904.752	C18 column-SFC/MS/MS	[M + NH4]+	[M + H ‒ Acyl FA]+	922.8 > 649.5	922.8 > 623.5	922.8 > 577.5	8.5994	7237159	10536244	11976749	8693659	5812585	8852758	12840198	19005234		DG 12:0_12:0 (IS)	0.027077	0.0326148	0.0570496	0.0281429	0.0157122	0.0192814	0.0260918	0.0412536		1.42721		1.92451
	217	TG(16:0)(18:2)(18:2)	C55H98O6	854.736	C18 column-SFC/MS/MS	[M + NH4]+	[M + H ‒ Acyl FA]+	872.75 > 599.5	872.75 > 575.5		8.2278	72867568	76447160	82153496	70244904	77459632	69374424	59224896	64997544		DG 12:0_12:0 (IS)	0.272626	0.236641	0.391327	0.227395	0.209383	0.151098	0.120347	0.141087		1.21493		0.725236
	218	TG(16:0)(18:2)(20:0)	C57H106O6	886.799	C18 column-SFC/MS/MS	[M + NH4]+	[M + H ‒ Acyl FA]+	904.85 > 631.55	904.85 > 607.55	904.85 > 575.5	8.9152	498471	369732	689138	603571	541332	604439	475008	408488		DG 12:0_12:0 (IS)	0.00186497	0.0011445	0.00328262	0.00195387	0.00146329	0.00131647	0.000965236	0.000886681		1.74		0.666214
	219	TG(16:0)(18:2)(20:1)	C57H104O6	884.783	C18 column-SFC/MS/MS	[M + NH4]+	[M + H ‒ Acyl FA]+	902.8 > 629.55	902.8 > 605.55		8.72387	13051764	12433709	13999134	10018860	11515008	11453765	9941475	11793591		DG 12:0_12:0 (IS)	0.0488317	0.0384884	0.066683	0.0324329	0.0311265	0.0249464	0.0202015	0.0255997		1.13509		0.816814
	220	TG(16:0)(18:2)(20:4)	C57H98O6	878.736	C18 column-SFC/MS/MS	[M + NH4]+	[M + H ‒ Acyl FA]+	896.75 > 623.5	896.75 > 599.5	896.75 > 575.5	8.3072	5.221e+06	5952897	4670822	3.65418e+06	3716513	4169297	4526929	4.28186e+06		DG 12:0_12:0 (IS)	0.0195338	0.0184271	0.0222488	0.0118292	0.0100462	0.00908076	0.00919891	0.00929441		0.897715		0.966871
	221	TG(16:0)(18:2)(22:6)	C59H98O6	902.736	C18 column-SFC/MS/MS	[M + NH4]+	[M + H ‒ Acyl FA]+	920.75 > 647.5	920.75 > 623.5		8.4764	2.16126e+06	2.49161e+06	2.97668e+06	2.04232e+06	1.80251e+06	1752634	2.15558e+06	2996403		DG 12:0_12:0 (IS)	0.00808613	0.00771274	0.014179	0.00661136	0.00487243	0.00381725	0.00438022	0.00650413		1.31594		1.25256
	222	TG(16:0)(20:1)(20:1)	C59H110O6	914.83	C18 column-SFC/MS/MS	[M + NH4]+	[M + H ‒ Acyl FA]+	932.85 > 659.6	932.85 > 605.55		9.26527	220924	119242	452054	294924	396020	222893	318328	295408		DG 12:0_12:0 (IS)	0.000826562	0.000369113	0.0021533	0.000954722	0.00107049	0.000485464	0.000646856	0.000641225		2.59938		0.827839
	223	TG(16:0)(22:6)(22:6)	C61H104O6	932.783	C18 column-SFC/MS/MS	[M + NH4]+	[M + H ‒ Acyl FA]+	968.75 > 695.5	968.75 > 623.5		8.71373	28860.1	65498.3	70061.8	30190.4	23415.9	45732.6	66351.8	93293.8		DG 12:0_12:0 (IS)	0.000107977	0.000202749	0.00033373	9.77318e-05	6.32963e-05	9.9606e-05	0.000134829	0.000202508		1.38856		2.0708
	224	TG(18:0)(18:0)(18:1)	C57H108O6	888.815	C18 column-SFC/MS/MS	[M + NH4]+	[M + H ‒ Acyl FA]+	906.85 > 605.55	906.85 > 607.55		9.06313	366078	378193	808614	464043	442111	513389	502718	1.6843e+06		DG 12:0_12:0 (IS)	0.00136964	0.00117069	0.00385173	0.00150219	0.00119508	0.00111817	0.00102154	0.00365601		2.10757		2.02207
	225	TG(18:0)(18:0)(18:2)	C57H106O6	886.799	C18 column-SFC/MS/MS	[M + NH4]+	[M + H ‒ Acyl FA]+	904.85 > 603.55	904.85 > 607.55		8.714	1.57642e+06	1.59448e+06	2.63878e+06	1.94672e+06	2.28738e+06	2.35436e+06	1.69381e+06	2.48343e+06		DG 12:0_12:0 (IS)	0.00589801	0.00493569	0.0125695	0.00630189	0.0061831	0.0051278	0.00344189	0.00539065		1.74191		0.780888
	226	TG(18:0)(18:1)(18:1)	C57H106O6	886.799	C18 column-SFC/MS/MS	[M + NH4]+	[M + H ‒ Acyl FA]+	904.85 > 603.55	904.85 > 605.55		8.83807	6746825	7847825	14306204	8321211	11079989	10242763	8125761	20132254		DG 12:0_12:0 (IS)	0.0252425	0.0242928	0.0681457	0.0269373	0.0299506	0.0223088	0.0165119	0.0437		1.9195		1.15217
	227	TG(18:0)(18:1)(18:2)	C57H104O6	884.783	C18 column-SFC/MS/MS	[M + NH4]+	[M + H ‒ Acyl FA]+	902.8 > 601.5	902.8 > 603.55	902.8 > 605.55	8.534	12191391	10478398	13716834	11610478	10196065	11806373	8894484	10540239		DG 12:0_12:0 (IS)	0.0456127	0.0324357	0.0653383	0.0375852	0.0275613	0.0257144	0.018074	0.0228791		1.31871		0.768702
	228	TG(18:0)(18:1)(20:1)	C59H110O6	914.83	C18 column-SFC/MS/MS	[M + NH4]+	[M + H ‒ Acyl FA]+	932.85 > 631.55	932.85 > 633.6		9.26653	300515	378207	824997	449369	512078	560026	690669	1.29993e+06		DG 12:0_12:0 (IS)	0.00112434	0.00117073	0.00392976	0.00145469	0.00138421	0.00121974	0.00140347	0.00282168		2.34609		1.62259
	229	TG(18:0)(18:1)(20:4)	C59H104O6	908.783	C18 column-SFC/MS/MS	[M + NH4]+	[M + H ‒ Acyl FA]+	926.8 > 625.5	926.8 > 627.55	926.8 > 605.55	8.8048	411856	726490	1.02377e+06	680718	456864	641120	913122	1.58213e+06		DG 12:0_12:0 (IS)	0.00154091	0.00224884	0.00487658	0.00220361	0.00123496	0.00139636	0.0018555	0.00343425		1.86824		2.0103
	230	TG(18:0)(18:1)(22:6)	C61H104O6	932.783	C18 column-SFC/MS/MS	[M + NH4]+	[M + H ‒ Acyl FA]+	950.8 > 649.5	950.8 > 651.55		8.96273	831345	1.48463e+06	3.53472e+06	2289254	638660	1.49297e+06	2.62524e+06	7710196		DG 12:0_12:0 (IS)	0.00311039	0.00459566	0.0168372	0.00741073	0.00172638	0.0032517	0.0053346	0.0167361		3.14661		4.43357
	231	TG(18:0)(18:2)(20:1)	C59H108O6	912.815	C18 column-SFC/MS/MS	[M + NH4]+	[M + H ‒ Acyl FA]+	930.85 > 629.55	930.85 > 633.6	930.85 > 603.55	9.1094	996722	960840	2.08425e+06	1.06223e+06	1.50546e+06	1896593	919756	1.73673e+06		DG 12:0_12:0 (IS)	0.00372913	0.00297427	0.00992802	0.00343863	0.00406944	0.00413079	0.00186898	0.00376982		1.99401		0.687639
	232	TG(18:0)(18:2)(22:6)	C61H102O6	930.768	C18 column-SFC/MS/MS	[M + NH4]+	[M + H ‒ Acyl FA]+	948.8 > 647.5	948.8 > 651.55	948.8 > 603.55	8.78307	4838368	7635421	11309985	6324014	3.36672e+06	4391412	8896732	15771531		DG 12:0_12:0 (IS)	0.0181022	0.0236353	0.0538736	0.020472	0.00910067	0.00956453	0.0180785	0.0342344		1.78126		2.8027
	233	TG(18:1)(18:1)(18:1)	C57H104O6	884.783	C18 column-SFC/MS/MS	[M + NH4]+	[M + H ‒ Acyl FA]+	902.8 > 603.55			8.64807	85124272	80247432	91261800	87109048	87587432	85578512	80508952	92085920		DG 12:0_12:0 (IS)	0.318483	0.248405	0.434713	0.281988	0.23676	0.186391	0.163597	0.199886		1.26427		0.858992
	234	TG(18:1)(18:1)(18:2)	C57H102O6	882.768	C18 column-SFC/MS/MS	[M + NH4]+	[M + H ‒ Acyl FA]+	900.8 > 601.5	900.8 > 603.55		8.53547	80133936	82151776	88996304	80950952	74945968	73876728	69482200	83625936		DG 12:0_12:0 (IS)	0.299812	0.2543	0.423922	0.262053	0.202589	0.160904	0.141191	0.181522		1.23797		0.887811
	235	TG(18:1)(18:1)(20:0)	C59H110O6	914.83	C18 column-SFC/MS/MS	[M + NH4]+	[M + H ‒ Acyl FA]+	932.85 > 633.6	932.85 > 603.55		9.25667	206602	247976	444653	251221	209634	299208	300828	503781		DG 12:0_12:0 (IS)	0.000772979	0.000767605	0.00211805	0.000813249	0.000566668	0.000651677	0.000611294	0.00109353		1.90272		1.39929
	236	TG(18:1)(18:1)(20:1)	C59H108O6	912.815	C18 column-SFC/MS/MS	[M + NH4]+	[M + H ‒ Acyl FA]+	930.85 > 631.55	930.85 > 603.55		9.04273	5195099	6028280	9312481	6295590	5478362	6637747	5595947	9862617		DG 12:0_12:0 (IS)	0.0194369	0.0186605	0.0443588	0.02038	0.0148087	0.0144571	0.0113712	0.0214082		1.6993		1.12006
	237	TG(18:1)(18:1)(20:4)	C59H102O6	906.768	C18 column-SFC/MS/MS	[M + NH4]+	[M + H ‒ Acyl FA]+	924.8 > 625.5	924.8 > 603.55		8.626	2677358	2.53712e+06	3.02058e+06	2.72637e+06	1.82441e+06	1.8499e+06	2.4841e+06	3.04973e+06		DG 12:0_12:0 (IS)	0.010017	0.00785363	0.0143881	0.00882575	0.0049316	0.00402911	0.0050478	0.00661988		1.29899		1.30209
	238	TG(18:1)(18:1)(22:6)	C61H102O6	930.768	C18 column-SFC/MS/MS	[M + NH4]+	[M + H ‒ Acyl FA]+	948.8 > 649.5	948.8 > 603.55		8.78387	5202408	6.93997e+06	12143108	7238587	2.9923e+06	4388992	7140809	14867574		DG 12:0_12:0 (IS)	0.0194642	0.0214826	0.0578421	0.0234326	0.00808856	0.00955926	0.0145104	0.0322722		1.98488		2.6509
	239	TG(18:1)(18:2)(18:2)	C57H100O6	880.752	C18 column-SFC/MS/MS	[M + NH4]+	[M + H ‒ Acyl FA]+	898.8 > 599.5	898.8 > 601.5		8.4122	94134184	92445368	101475104	91622328	95136952	89257584	72619624	79936192		DG 12:0_12:0 (IS)	0.352193	0.286163	0.483363	0.296598	0.257167	0.194404	0.147566	0.173513		1.22183		0.711027
	240	TG(18:1)(18:2)(20:0)	C59H108O6	912.815	C18 column-SFC/MS/MS	[M + NH4]+	[M + H ‒ Acyl FA]+	930.85 > 631.55	930.85 > 633.6	930.85 > 601.5	9.12213	609522	596278	936722	608908	816819	718047	616965	1.00288e+06		DG 12:0_12:0 (IS)	0.00228046	0.00184577	0.00446195	0.00197115	0.00220797	0.00156391	0.0012537	0.00217689		1.55908		0.909518
	241	TG(18:1)(18:2)(20:1)	C59H106O6	910.799	C18 column-SFC/MS/MS	[M + NH4]+	[M + H ‒ Acyl FA]+	928.85 > 629.55	928.85 > 631.55		8.91953	12919489	13052625	21928682	14806748	14363908	15666871	11646514	15270769		DG 12:0_12:0 (IS)	0.0483368	0.0404042	0.104454	0.0479321	0.0388275	0.0341226	0.0236662	0.0331474		1.7172		0.778801
	242	TG(18:1)(18:2)(20:4)	C59H100O6	904.752	C18 column-SFC/MS/MS	[M + NH4]+	[M + H ‒ Acyl FA]+	922.8 > 623.5	922.8 > 625.5	922.8 > 601.5	8.50287	4201751	4697680	4860132	3.52604e+06	3.02054e+06	3.48174e+06	3.53486e+06	3883434		DG 12:0_12:0 (IS)	0.0157204	0.0145416	0.0231506	0.0114144	0.00816491	0.00758326	0.00718298	0.00842956		1.14219		0.991387
	243	TG(18:1)(18:2)(22:6)	C61H100O6	928.752	C18 column-SFC/MS/MS	[M + NH4]+	[M + H ‒ Acyl FA]+	946.8 > 647.5	946.8 > 649.5		8.67207	8690452	10841119	15441283	9496532	5994318	6.59217e+06	9311431	15145967		DG 12:0_12:0 (IS)	0.0325144	0.0335585	0.0735525	0.030742	0.0162034	0.0143578	0.0189212	0.0328765		1.57848		1.69488
	244	TG(18:1)(20:1)(20:1)	C61H112O6	940.846	C18 column-SFC/MS/MS	[M + NH4]+	[M + H ‒ Acyl FA]+	958.9 > 659.6	958.9 > 631.55		9.48347	595940	531624	1126217	723840	683824	870886	729336	1.18694e+06		DG 12:0_12:0 (IS)	0.00222964	0.00164563	0.00536458	0.0023432	0.00184847	0.0018968	0.00148204	0.00257642		1.98896		1.08362
	245	TG(18:1)(20:1)(20:4)	C61H106O6	934.799	C18 column-SFC/MS/MS	[M + NH4]+	[M + H ‒ Acyl FA]+	952.85 > 653.55	952.85 > 625.5	952.85 > 631.55	9.0104	90530.2	161470	160686	117918	90220.3	111999	122776	143473		DG 12:0_12:0 (IS)	0.000338709	0.000499829	0.000765408	0.000381723	0.000243877	0.000243936	0.000249485	0.00031143		1.36801		1.14986
	246	TG(18:1)(22:6)(22:6)	C63H106O6	958.799	C18 column-SFC/MS/MS	[M + NH4]+	[M + H ‒ Acyl FA]+	994.8 > 695.5	994.8 > 649.5		8.89827	34247.3	31996.2	78190.8	38532.4	n.d.	20535.6	33821	105564		DG 12:0_12:0 (IS)	0.000128132	9.90438e-05	0.000372451	0.000124736	0	4.47267e-05	6.87258e-05	0.000229142		2.18856		6.65974
	247	TG(18:2)(18:2)(18:2)	C57H98O6	878.736	C18 column-SFC/MS/MS	[M + NH4]+	[M + H ‒ Acyl FA]+	896.75 > 599.5			8.31253	74098888	70718040	76042536	68830736	82453096	67952320	53326836	58192288		DG 12:0_12:0 (IS)	0.277233	0.218907	0.362218	0.222817	0.222881	0.148001	0.108362	0.126315		1.17918		0.632754
	248	TG(18:2)(18:2)(20:0)	C59H106O6	910.799	C18 column-SFC/MS/MS	[M + NH4]+	[M + H ‒ Acyl FA]+	928.85 > 631.55	928.85 > 599.5		8.97733	287009	328590	730746	378196	340196	461966	250481	318175		DG 12:0_12:0 (IS)	0.00107381	0.00101715	0.00348081	0.00122429	0.000919594	0.00100617	0.000508987	0.000690646		2.25021		0.62294
	249	TG(18:2)(18:2)(20:1)	C59H104O6	908.783	C18 column-SFC/MS/MS	[M + NH4]+	[M + H ‒ Acyl FA]+	926.8 > 629.55	926.8 > 599.5		8.7972	8.3746e+06	6937348	11813808	7183477	8710313	7929433	5.57319e+06	6.42257e+06		DG 12:0_12:0 (IS)	0.0313326	0.0214745	0.0562735	0.0232542	0.0235451	0.0172704	0.011325	0.0139411		1.506		0.619032
	250	TG(18:2)(18:2)(20:4)	C59H98O6	902.736	C18 column-SFC/MS/MS	[M + NH4]+	[M + H ‒ Acyl FA]+	920.75 > 623.5	920.75 > 599.5		8.403	1.77029e+06	2.15435e+06	2.27846e+06	1.35649e+06	1.48935e+06	1.38008e+06	1328356	1.55932e+06		DG 12:0_12:0 (IS)	0.00662334	0.00666876	0.0108532	0.00439119	0.00402592	0.00300582	0.00269927	0.00338474		1.14687		0.865221
	251	TG(18:2)(18:2)(22:0)	C61H110O6	938.83	C18 column-SFC/MS/MS	[M + NH4]+	[M + H ‒ Acyl FA]+	956.85 > 659.6	956.85 > 599.5		9.40587	76851.3	67302.1	77114.3	87076.2	86624.3	92310.1	43714.7	76836.8		DG 12:0_12:0 (IS)	0.000287531	0.000208333	0.000367324	0.000281881	0.000234157	0.000201052	8.88301e-05	0.000166785		1.30924		0.58734
	252	TG(18:2)(18:2)(22:6)	C61H98O6	926.736	C18 column-SFC/MS/MS	[M + NH4]+	[M + H ‒ Acyl FA]+	944.75 > 647.5	944.75 > 599.5		8.561	2.15625e+06	3444967	4697992	2937555	1.77434e+06	1790797	2.40896e+06	4.48582e+06		DG 12:0_12:0 (IS)	0.00806737	0.0106638	0.0223783	0.00950939	0.00479626	0.00390037	0.00489511	0.00973713		1.70238		1.68252
	253	TG(18:2)(20:1)(20:1)	C61H110O6	938.83	C18 column-SFC/MS/MS	[M + NH4]+	[M + H ‒ Acyl FA]+	956.85 > 659.6	956.85 > 629.55		9.32747	796602	765348	1523223	994806	898786	899928	669058	940740		DG 12:0_12:0 (IS)	0.0029804	0.00236913	0.00725567	0.00322037	0.00242954	0.00196005	0.00135955	0.00204201		1.95831		0.774917
	254	TG(18:2)(20:1)(20:4)	C61H104O6	932.783	C18 column-SFC/MS/MS	[M + NH4]+	[M + H ‒ Acyl FA]+	950.8 > 653.55	950.8 > 623.5	950.8 > 629.55	8.87693	233863	256437	395965	188299	163004	216732	207227	300572		DG 12:0_12:0 (IS)	0.000874972	0.000793797	0.00188613	0.000609559	0.00044062	0.000472044	0.000421093	0.000652436		1.49553		1.17626
	255	TG(18:2)(20:4)(20:4)	C61H98O6	926.736	C18 column-SFC/MS/MS	[M + NH4]+	[M + H ‒ Acyl FA]+	944.75 > 647.5	944.75 > 623.5		8.5506	108626	128228	184632	84056.2	66466.6	93447.1	170145	204752		DG 12:0_12:0 (IS)	0.000406412	0.000396927	0.000879468	0.000272105	0.000179668	0.000203529	0.000345742	0.000444444		1.43348		2.06209
	256	TG(18:2)(22:6)(22:6)	C65H98O6	974.736	C18 column-SFC/MS/MS	[M + NH4]+	[M + H ‒ Acyl FA]+	992.75 > 695.5	992.75 > 647.5		8.78753	27247.3	21824.2	74131.2	29011.4	n.d.	14148.6	28349.3	59020.9		DG 12:0_12:0 (IS)	0.000101943	6.75564e-05	0.000353114	9.39151e-05	0	3.08157e-05	5.76069e-05	0.000128113		2.63735		6.02681
	257	TG(20:4)(20:4)(20:4)	C71H130O6	1078.99	C18 column-SFC/MS/MS	[M + NH4]+	[M + H ‒ Acyl FA]+	968.75 > 647.5			8.62993	59659.9	65793.9	112125	57234.7	20247.3	33317.1	55644.1	130056		DG 12:0_12:0 (IS)	0.000223211	0.000203664	0.000534093	0.000185279	5.4731e-05	7.25649e-05	0.000113071	0.000282305		1.68521		3.10596
		Cer d18:1_17:0 (IS)	C35H69NO3	551.528	DEA-SFC/MS/MS	[M + H]+	[C18H34N]+	552.3 > 264.3	610.7 > 268.25	-	5.54147	6.40806e+06	6539632	6.79343e+06	7.16279e+06	6.80187e+06	6.73739e+06	7250914	6.72482e+06
		DG 12:0_12:0 (IS)	C27H52O5	456.381	DEA-SFC/MS/MS	[M + NH4]+	[M + H ‒ Acyl FA]+	474.1 > 257.2	-	-	4.10547	33243838	37433484	36195788	35344488	37981692	36997200	38148532	36504960
		FA 17:0 (IS)	C17H34O2	270.256	DEA-SFC/MS/MS	[M ‒ H]‒	[M ‒ H]‒	269.1 > 269.1	-	-	5.15055	4408882	3.97526e+06	4332245	4.30303e+06	4026341	4224658	4325531	4135340
		LPC 17:0 (IS)	C25H52NO7P	509.348	DEA-SFC/MS/MS	[M + H]+	[C5H15O4NP]+	510.2 > 184.1	568.1 > 269.3	-	8.76353	1.76194e+07	1.91271e+07	1.99218e+07	2.21404e+07	2.28632e+07	2.06717e+07	2.35808e+07	21555399
		LPE 17:0 (IS)	C22H44NO7P	465.286	DEA-SFC/MS/MS	[M + H]+	[C5H15O4NP]+	466 > 325.3	464.1 > 267.3	-	11.1896	19176178	2.07052e+07	19493760	18614977	1.86263e+07	18064379	19910382	17893351
		MG 17:0 (IS)	C20H40O4	344.293	DEA-SFC/MS/MS	[M + H]+	[M + H ‒ H2O]+	345.1 > 327.3	402.9 > 59	-	5.07673	28429534	30889038	31978924	29364276	33423494	32175814	35806428	32744652
		PC 17:0_17:0 (IS)	C42H84NO8P	761.593	DEA-SFC/MS/MS	[M + CH3COO]‒	[Acyl FA ‒ H]‒	820.3 > 269.3	762.6 > 183.9	-	7.49272	2258947	2.39379e+06	2.31781e+06	2.23833e+06	2.2228e+06	2081262	2.25339e+06	1.76271e+06
		PE 17:0_17:0 (IS)	C39H78NO8P	719.547	DEA-SFC/MS/MS	[M ‒ H]‒	[Acyl FA ‒ H]‒	718.2 > 269.2	720.3 > 579.3	-	9.12242	18408296	19266076	20408860	21158938	18803854	18999264	20421996	15970779
		SM d18:1_17:0 (IS)	C40H81N2O6P	716.583	DEA-SFC/MS/MS	[M + H]+	[C5H15O4NP]+	717.4 > 183.9	775.3 > 701.5	-	8.1658	10710675	11345478	10720562	11459123	14072613	16611402	17605494	16611353

## Sheet: Supplementary Table S6
	Supplementary Table S6. Metabolic profile data of 185 hydrophilic metabolites during the 2-week pair-feeding
		Hydrophilic metabolite	Abbreviation	Molecular formula	Exact mass	KEGG ID	HMDB ID	Method	Adduct ion	RT (min)	Peak area																Relative peak area (Analyte/IS/sample amount, mg)													SOL (CANA/Vehicle)					EDL (CANA/Vehicle)
											Vehicle-treated mice SOL			CANA-treated mice SOL			Vehicle-treated mice EDL			CANA-treated mice EDL				IS			Vehicle-treated mice SOL			CANA-treated mice SOL			Vehicle-treated mice EDL			CANA-treated mice EDL				Fold change	F-test	Welch's or student's t-test	P-value		Fold change	F-test	Welch's or student's t-test	P-value
											1	2	3	1	2	3	1	2	3	1	2	3		Compound	Method	Adduct ion	1	2	3	1	2	3	1	2	3	1	2	3
											Sample amount (mg)
											10	10	10	10	10	10	10	10	10	10	10	10
	1	2-Ketoglutaric acid	2KG	C5H6O5	146.022	C00026	HMDB00208	IC/MS	[M ‒ H]‒	9.44 ±0.02	2.09343e+08	1.35298e+08	1.97388e+08	1.1965e+08	1.06085e+08	1.84394e+08	1.77555e+08	1.92332e+08	1.28175e+08	7.55931e+07	9.71388e+07	1.55697e+08		PIPES (IS)	IC/MS	[M ‒ H]‒	1.17512	1.35901	1.08134	0.793531	0.888041	1.12103	0.871337	0.894865	1.00143	0.850484	0.8333	0.823456		0.775169	0.825083	student's t-test	0.0997551		0.905914	0.0749487	student's t-test	0.100477
	2	3-Hydroxybutyric acid	3-Hydroxybutyric acid	C4H8O3	104.047	C01089	HMDB00357	IC/MS	[M ‒ H]‒	3.44 ±0.02	2.44811e+07	1.10748e+07	1.99288e+07	3.50734e+07	4.36782e+07	1.28018e+08	5.64947e+07	6.76716e+07	3.17422e+07	4.70628e+07	6.2872e+07	1.48621e+08		PIPES (IS)	IC/MS	[M ‒ H]‒	0.137422	0.111242	0.109175	0.23261	0.365632	0.778289	0.277243	0.314857	0.248002	0.529495	0.539344	0.78603		3.8468	0.00610613	Welch's t-test	0.174302		2.20791	0.100963	student's t-test	0.0171359
	3	6-Phosphogluconic acid	6PG	C6H13O10P	276.025	C00345	HMDB01316	IC/MS	[M ‒ H]‒	11.48 ±0.01	4.49244e+06	2.28984e+06	4.29862e+06	1.94953e+06	2.18993e+06	3.19557e+06	5.00771e+06	5.03182e+06	3.56555e+06	2.51471e+06	2.4003e+06	3.45482e+06		PIPES (IS)	IC/MS	[M ‒ H]‒	0.0252177	0.0230005	0.0235489	0.0129294	0.018332	0.0194276	0.0245749	0.0234116	0.0278578	0.0282925	0.0205908	0.018272		0.706299	0.198515	student's t-test	0.0293791		0.885436	0.323836	student's t-test	0.430734
	4	Adenosine 5'-diphosphate	ADP	C10H15N5O10P2	427.029	C00008	HMDB01341	IC/MS	[M ‒ H]‒	16.3 ±0.01	2.08375e+08	8.64423e+07	2.37373e+08	1.31281e+08	1.50408e+08	1.84501e+08	2.57287e+08	3.22189e+08	2.76841e+08	1.85475e+08	2.19545e+08	3.00762e+08		PIPES (IS)	IC/MS	[M ‒ H]‒	1.16969	0.868277	1.30039	0.870669	1.25907	1.12168	1.26261	1.49906	2.16297	2.08674	1.88336	1.59068		0.973961	0.882612	student's t-test	0.873793		1.12918	0.444056	student's t-test	0.525878
	5	Adenosine 5'-diphosphate ribose	ADP-Rib	C15H23N5O14P2	559.072	C00301	HMDB01178	IC/MS	[M ‒ H]‒	14.7 ±0.02	7.29135e+07	3.54382e+07	6.59582e+07	4.85362e+07	4.29819e+07	6.56258e+07	6.60585e+07	8.12863e+07	5.85741e+07	4.87701e+07	5.02819e+07	7.05288e+07		PIPES (IS)	IC/MS	[M ‒ H]‒	0.40929	0.355962	0.361336	0.321896	0.359803	0.398974	0.324177	0.378203	0.457642	0.548703	0.43134	0.373015		0.959245	0.734473	student's t-test	0.613386		1.16641	0.720314	student's t-test	0.375502
	6	Adenosine 5'-monophosphate	AMP	C10H14N5O7P	347.063	C00020	HMDB00045	IC/MS	[M ‒ H]‒	10.48 ±0.03	4.44353e+08	1.85814e+08	3.82133e+08	3.87921e+08	4.28143e+08	4.59686e+08	3.16467e+08	5.09276e+08	3.01678e+08	2.38244e+08	2.69454e+08	5.32091e+08		PIPES (IS)	IC/MS	[M ‒ H]‒	2.49432	1.86643	2.09342	2.57273	3.58401	2.79468	1.55304	2.36952	2.35702	2.68043	2.31149	2.81414		1.38692	0.527045	student's t-test	0.0804329		1.24309	0.472893	student's t-test	0.175079
	7	Adenosine 5'-triphosphate	ATP	C10H16N5O13P3	506.996	C00002	HMDB00538	IC/MS	[M ‒ H]‒	20.64 ±0.02	5.32731e+07	2.46506e+07	4.41906e+07	3.18613e+07	4.36826e+07	5.45871e+07	2.20277e+07	5.16353e+07	5.56163e+07	2.5009e+07	1.39206e+07	2.892e+07		PIPES (IS)	IC/MS	[M ‒ H]‒	0.299042	0.247605	0.242087	0.211307	0.365669	0.331864	0.108099	0.240245	0.434532	0.281372	0.119417	0.152953		1.15228	0.260653	student's t-test	0.470101		0.707318	0.426484	student's t-test	0.51433
	8	Adenosine 3',5'-cyclic monophosphate	cAMP	C10H12N5O6P	329.053	C00575	HMDB00058	IC/MS	[M ‒ H]‒	11.04 ±0.02	236665	81229.2	234737	151575	206508	245951	165505	308183	197233	170973	154698	330670		PIPES (IS)	IC/MS	[M ‒ H]‒	0.00132849	0.000815913	0.00128595	0.00100526	0.00172868	0.00149526	0.0008122	0.00143389	0.00154099	0.00192358	0.00132707	0.00174886		1.23288	0.744931	student's t-test	0.378409		1.32015	0.755692	student's t-test	0.233245
	9	Cytidine 5'-diphosphate	CDP	C9H15N3O11P2	403.018	C00112	HMDB01546	IC/MS	[M ‒ H]‒	13.2 ±0.01	1.86552e+06	1.40203e+06	3.14147e+06	842172	1.67895e+06	1.88462e+06	1.6232e+06	2.34052e+06	3.54656e+06	1.13611e+06	1.70225e+06	1.6377e+06		PIPES (IS)	IC/MS	[M ‒ H]‒	0.0104719	0.0140828	0.0172097	0.00558536	0.0140546	0.0114576	0.00796575	0.0108898	0.0277094	0.0127821	0.0146027	0.00866151		0.744593	0.753052	student's t-test	0.325132		0.774109	0.150889	student's t-test	0.612836
	10	cis-Aconitic acid	cis-Aco	C6H6O6	174.016	C00417	HMDB00072	IC/MS	[M ‒ H]‒	14.43 ±0.01	4.12464e+07	1.26489e+07	2.03544e+07	1.84281e+07	1.11352e+07	2.2034e+07	1.69236e+07	2.18423e+07	1.29579e+07	7.10037e+06	1.19803e+07	1.37202e+07		PIPES (IS)	IC/MS	[M ‒ H]‒	0.231531	0.127053	0.111506	0.122217	0.0932129	0.133956	0.0830513	0.101626	0.10124	0.0798849	0.102772	0.0725637		0.743231	0.187153	student's t-test	0.366885		0.892637	0.624207	student's t-test	0.403738
	11	Citric acid	Cit	C6H8O7	192.027	C00158	HMDB00094	IC/MS	[M ‒ H]‒	13.33 ±0.01	1.0026e+09	4.25437e+08	9.44586e+08	6.04062e+08	4.23423e+08	9.44914e+08	5.27003e+08	6.75869e+08	4.28711e+08	2.6659e+08	3.38509e+08	5.32869e+08		PIPES (IS)	IC/MS	[M ‒ H]‒	5.62795	4.27334	5.17468	4.0062	3.5445	5.74464	2.58622	3.14463	3.34953	2.99935	2.90388	2.81825		0.881889	0.522081	student's t-test	0.488656		0.960475	0.0999219	student's t-test	0.636111
	12	Cytidine-5'-monophosphate	CMP	C9H14N3O8P	323.052	C00055	HMDB00095	IC/MS	[M ‒ H]‒	7.98 ±0.05	1.40086e+07	6.19717e+06	1.47096e+07	7.67021e+06	8.25485e+06	1.41257e+07	1.81143e+07	2.23297e+07	1.28714e+07	7.88161e+06	8.85441e+06	1.80854e+07		PIPES (IS)	IC/MS	[M ‒ H]‒	0.0786352	0.062248	0.0805831	0.0508695	0.0691017	0.0858779	0.0888946	0.103894	0.100564	0.0886744	0.0759571	0.0956507		0.929483	0.497157	student's t-test	0.678414		0.887267	0.767135	student's t-test	0.207684
	13	Coenzyme A	CoA	C21H36N7O16P3S	767.115	C00010	HMDB01423	IC/MS	[M ‒ H]‒	21.41 ±0.03	2.55158e+06	546845	2.43167e+06	2.05388e+06	1.9794e+06	2.06321e+06	218643	443517	310004	450647	361372	434703		PIPES (IS)	IC/MS	[M ‒ H]‒	0.014323	0.00549283	0.0133213	0.0136215	0.0165696	0.0125433	0.00107297	0.00206356	0.00242207	0.00507014	0.00310001	0.00229907		1.28963	0.313421	student's t-test	0.35198		1.88343	0.387249	student's t-test	0.148765
	14	Cytidine 5'-triphosphate	CTP	C9H16N3O14P3	482.985	C00063	HMDB00082	IC/MS	[M ‒ H]‒	17.56 ±0.02	168014	0	227647	0	113336	71285.3	0	91051.8	418108	83512.4	0	0		PIPES (IS)	IC/MS	[M ‒ H]‒	0.000943123	0	0.00124711	0	0.000948742	0.000433381	0	0.000423639	0.00326669	0.000939582	0	0		0.631039	0.695776	student's t-test	0.59339		0.254606	0.170598	student's t-test	0.440718
	15	D-Fructose 1,6-bisphosphate	FBP	C6H14O12P2	339.996	C00354	HMDB01058	IC/MS	[M ‒ H]‒	16.95 ±0.01	9.64905e+06	8.40377e+06	6.07637e+07	5.93038e+06	3.01751e+07	3.82208e+07	2.49005e+06	4.08649e+07	5.97801e+07	1.61513e+07	5.09255e+06	1.3349e+07		PIPES (IS)	IC/MS	[M ‒ H]‒	0.0541637	0.0844123	0.332879	0.0393308	0.252597	0.232365	0.0122197	0.190133	0.467064	0.181715	0.0436862	0.0706006		1.11207	0.744151	student's t-test	0.882065		0.442179	0.184959	student's t-test	0.420887
	16	D-Fructose 6-phosphate	F6P	C6H13O9P	260.03	C00085	HMDB00124	IC/MS	[M ‒ H]‒	9.28 ±0.01	4.82931e+06	3.68684e+06	7.01191e+06	1.91336e+06	2.70023e+06	4.23323e+06	1.51395e+06	4.03524e+06	5.03991e+06	1.94841e+06	1.66004e+06	2.09258e+06		PIPES (IS)	IC/MS	[M ‒ H]‒	0.0271087	0.0370328	0.038413	0.0126896	0.0226037	0.0257361	0.00742958	0.0187749	0.039377	0.0219212	0.0142406	0.0110673		0.595092	0.901017	student's t-test	0.059458		0.72016	0.212269	student's t-test	0.569703
	17	D-Gluconic acid	Gluconic acid	C6H12O7	196.058	C00257	HMDB00625	IC/MS	[M ‒ H]‒	3.15 ±0.01	5.25785e+07	1.89001e+07	2.00046e+07	1.78014e+07	1.08305e+07	3.00182e+07	2.72307e+07	2.73662e+07	1.44783e+07	8.87938e+06	1.01087e+07	1.66116e+07		PIPES (IS)	IC/MS	[M ‒ H]‒	0.295142	0.189843	0.10959	0.118061	0.0906629	0.182496	0.133633	0.127327	0.113119	0.0999002	0.0867168	0.0878559		0.657981	0.40849	student's t-test	0.323349		0.733729	0.651685	student's t-test	0.0108735
	18	D-Glucose 1-phosphate	G1P	C6H13O9P	260.03	C00103	HMDB01586	IC/MS	[M ‒ H]‒	6.63 ±0.01	1.27505e+07	9.52755e+06	1.85876e+07	8.20749e+06	9.07844e+06	1.5863e+07	6.63767e+06	1.5771e+07	1.58472e+07	1.14021e+07	7.06088e+06	1.46777e+07		PIPES (IS)	IC/MS	[M ‒ H]‒	0.0715732	0.0957003	0.101827	0.0544328	0.075996	0.0964398	0.0325738	0.073378	0.123815	0.128283	0.0605714	0.077628		0.843062	0.734	student's t-test	0.408008		1.15979	0.745078	student's t-test	0.73195
	19	D-Glucose 6-phosphate	G6P	C6H13O9P	260.03	C00092	HMDB01401	IC/MS	[M ‒ H]‒	9.06 ±0.01	1.65122e+07	1.72918e+07	2.65682e+07	4.63369e+06	1.09971e+07	1.67791e+07	4.12418e+06	1.63033e+07	2.04642e+07	8.38418e+06	7.97112e+06	7.96079e+06		PIPES (IS)	IC/MS	[M ‒ H]‒	0.0926889	0.173689	0.145547	0.030731	0.092057	0.102009	0.0202391	0.0758546	0.159887	0.0943288	0.0683798	0.0421032		0.545724	0.936795	student's t-test	0.127935		0.800106	0.242466	student's t-test	0.713741
	20	D-Glucuronic acid	Glucuronic acid	C6H10O7	194.043	C00191	HMDB00127	IC/MS	[M ‒ H]‒	5.3 ±0.01	5.16974e+06	1.99038e+06	1.47877e+06	1.21799e+06	811499	2.28707e+06	2.71405e+06	1.91615e+06	1.0516e+06	647590	715545	1.34145e+06		PIPES (IS)	IC/MS	[M ‒ H]‒	0.0290197	0.0199925	0.00810109	0.00807784	0.00679309	0.0139043	0.013319	0.0089153	0.00821616	0.00728591	0.00613827	0.00709468		0.503828	0.230813	student's t-test	0.216363		0.673844	0.094145	student's t-test	0.113071
	21	D-Ribose 5-phosphate	R5P	C5H11O8P	230.019	C00117	HMDB01548	IC/MS	[M ‒ H]‒	9.84 ±0.01	3.08754e+07	2.63879e+07	2.4521e+07	1.8325e+07	1.16013e+07	2.54313e+07	2.65615e+07	1.39312e+07	1.47781e+07	9.30029e+06	1.2305e+07	1.32494e+07		PIPES (IS)	IC/MS	[M ‒ H]‒	0.173315	0.265056	0.134332	0.121533	0.0971149	0.15461	0.130349	0.0648178	0.115462	0.104636	0.105558	0.0700737		0.651748	0.312053	student's t-test	0.1901		0.902261	0.514832	student's t-test	0.682865
	22	D-Sedoheputulose 7-phosphate	S7P	C7H15O10P	290.04	C05382	HMDB01068	IC/MS	[M ‒ H]‒	10 ±0.01	3.63347e+06	2.83285e+06	1.28597e+06	1.68361e+06	1.30965e+06	2.18617e+06	859433	895145	473279	493360	266005	459459		PIPES (IS)	IC/MS	[M ‒ H]‒	0.020396	0.0284548	0.00704485	0.0111658	0.0109631	0.0132909	0.0042176	0.00416486	0.00369775	0.0055507	0.00228191	0.00243		0.633678	0.0280386	Welch's t-test	0.388419		0.849539	0.0469239	Welch's t-test	0.628542
	23	Deoxythymidine 5'-diphosphate	dTDP	C10H16N2O11P2	402.023	C00363	HMDB01274	IC/MS	[M ‒ H]‒	18.62 ±0.01	247603	0	193003	153759	158588	191557	315424	531700	417046	191716	215926	424988		PIPES (IS)	IC/MS	[M ‒ H]‒	0.00138989	0	0.00105732	0.00101975	0.00132755	0.00116458	0.00154792	0.00247385	0.0032584	0.00215696	0.00185231	0.00224769		1.43505	0.0861605	student's t-test	0.453953		0.859453	0.110554	student's t-test	0.539197
	24	Deoxythymidine 5'-monophosphate	dTMP	C10H15N2O8P	322.057	C00364	HMDB01227	IC/MS	[M ‒ H]‒	13.52 ±0.01	543198	305720	443409	264455	164578	321211	615872	428086	256522	192652	225555	291718		PIPES (IS)	IC/MS	[M ‒ H]‒	0.00304917	0.00307084	0.00242911	0.00175389	0.00137769	0.00195281	0.00302234	0.00199176	0.00200422	0.00216749	0.00193491	0.00154285		0.594727	0.782289	student's t-test	0.0128142		0.804358	0.443478	student's t-test	0.302511
	25	Deoxythymidine 5'-triphosphate	dTTP	C10H17N2O14P3	481.989	C00459	HMDB01342	IC/MS	[M ‒ H]‒	22.37 ±0.02	0	0	0	0	0	0	0	0	0	0	0	0		PIPES (IS)	IC/MS	[M ‒ H]‒	0	0	0	0	0	0	0	0	0	0	0	0		#DIV/0!	#DIV/0!	#DIV/0!	#DIV/0!		#DIV/0!	#DIV/0!	#DIV/0!	#DIV/0!
	26	Flavin adenine dinucleotide	FAD	C27H33N9O15P2	785.157	C00016	HMDB01248	IC/MS	[M ‒ H]‒	22.55 ±0.03	1.52518e+06	749913	1.19372e+06	954972	772307	1.26067e+06	668371	774519	629039	416314	457550	695091		PIPES (IS)	IC/MS	[M ‒ H]‒	0.00856139	0.00753257	0.00653947	0.00633346	0.00646501	0.00766429	0.00327998	0.00360362	0.0049147	0.00468386	0.00392507	0.00367622		0.904095	0.689495	student's t-test	0.372437		1.04126	0.537657	student's t-test	0.795035
	27	Flavin mononucleotide	FMN	C17H21N4O9P	456.105	C00061	HMDB01520	IC/MS	[M ‒ H]‒	21.35 ±0.02	1.31585e+06	648800	1.09993e+06	731255	642301	1.03984e+06	589242	658953	585225	340402	413168	651591		PIPES (IS)	IC/MS	[M ‒ H]‒	0.00738636	0.00651693	0.00602568	0.00484975	0.00537673	0.00632173	0.00289166	0.00306593	0.00457238	0.00382979	0.00354434	0.00344615		0.830359	0.920986	student's t-test	0.126936		1.02757	0.0888711	student's t-test	0.867893
	28	Fumaric acid	Fum	C4H4O4	116.011	C00122	HMDB00134	IC/MS	[M ‒ H]‒	9.98 ±0.01	1.43091e+08	5.619e+07	1.01339e+08	7.09159e+07	4.61352e+07	4.67587e+07	9.01481e+07	1.02494e+08	4.41793e+07	4.62976e+07	6.66427e+07	6.75254e+07		PIPES (IS)	IC/MS	[M ‒ H]‒	0.803224	0.564405	0.555162	0.47032	0.3862	0.284271	0.442394	0.476877	0.345174	0.520885	0.571691	0.35713		0.593299	0.61007	student's t-test	0.0554321		1.14652	0.54122	student's t-test	0.460969
	29	Guanosine 5'-diphosphate	GDP	C10H15N5O11P2	443.024	C00035	HMDB01201	IC/MS	[M ‒ H]‒	23.12 ±0.01	1.66603e+07	6.73065e+06	1.83404e+07	1.3511e+07	1.56981e+07	1.70178e+07	1.6756e+07	2.4575e+07	1.85632e+07	1.12616e+07	1.62828e+07	1.97795e+07		PIPES (IS)	IC/MS	[M ‒ H]‒	0.0935203	0.0676066	0.100473	0.0896064	0.131409	0.10346	0.0822289	0.114341	0.145035	0.126702	0.139681	0.10461		1.24035	0.796376	student's t-test	0.256546		1.08603	0.483444	student's t-test	0.662532
	30	Glycerol 3-phosphate	G3P	C3H9O6P	172.014	C00093	HMDB00126	IC/MS	[M ‒ H]‒	6.62 ±0.01	3.97485e+08	2.59049e+08	3.62114e+08	2.08315e+08	2.49436e+08	3.75782e+08	2.27452e+07	2.1476e+08	1.60739e+08	4.85637e+07	7.47243e+07	2.09269e+08		PIPES (IS)	IC/MS	[M ‒ H]‒	2.23123	2.60204	1.98375	1.38156	2.08804	2.28458	0.11162	0.999219	1.25586	0.546381	0.641019	1.10679		0.84409	0.600788	student's t-test	0.340608		0.969363	0.399533	student's t-test	0.953259
	31	Guanosine 5'-monophosphate	GMP	C10H14N5O8P	363.058	C00144	HMDB01397	IC/MS	[M ‒ H]‒	18.19 ±0.01	8.12192e+07	4.6363e+07	6.67632e+07	4.79912e+07	3.40477e+07	5.85489e+07	7.58157e+07	5.19154e+07	3.91259e+07	2.92306e+07	3.71538e+07	4.2409e+07		PIPES (IS)	IC/MS	[M ‒ H]‒	0.455914	0.465698	0.365746	0.318282	0.285014	0.35595	0.372059	0.241548	0.305692	0.328868	0.318721	0.224294		0.745129	0.586445	student's t-test	0.044549		0.948421	0.877007	student's t-test	0.768975
	32	Guanosine 5'-triphosphate	GTP	C10H16N5O14P3	522.991	C00044	HMDB01273	IC/MS	[M ‒ H]‒	26.29 ±0.02	2.16741e+06	641346	2.82039e+06	1.23629e+06	2.13759e+06	1.96487e+06	1.7795e+06	5.29418e+06	4.38641e+06	2.18676e+06	2.28884e+06	4.56182e+06		PIPES (IS)	IC/MS	[M ‒ H]‒	0.0121665	0.00644206	0.0154508	0.00819921	0.0178938	0.0119455	0.00873276	0.0246323	0.0342712	0.0246028	0.0196347	0.0241267		1.11683	0.930291	student's t-test	0.748395		1.01076	0.086456	student's t-test	0.976101
	33	Inosine 5'-monophosphate	IMP	C10H13N4O8P	348.047	C00130	HMDB00175	IC/MS	[M ‒ H]‒	17.76 ±0.02	1.3536e+09	9.06684e+08	1.26353e+09	9.2641e+08	8.4741e+08	1.16148e+09	1.95183e+09	1.832e+09	1.61574e+09	1.20806e+09	1.41041e+09	1.66318e+09		PIPES (IS)	IC/MS	[M ‒ H]‒	7.59827	9.10726	6.92191	6.14403	7.09371	7.06126	9.57846	8.52378	12.6238	13.5916	12.0992	8.7963		0.859128	0.376949	student's t-test	0.196696		1.1224	0.858917	student's t-test	0.540486
	34	Isocitric acid	IsoCit	C6H8O7	192.027	C00311	HMDB00193	IC/MS	[M ‒ H]‒	13.88 ±0.01	9.52431e+07	2.44388e+07	3.62985e+07	3.64639e+07	3.04767e+07	3.46372e+07	2.8303e+07	3.21161e+07	1.67367e+07	1.12062e+07	2.09751e+07	1.99891e+07		PIPES (IS)	IC/MS	[M ‒ H]‒	0.534635	0.245477	0.198853	0.241832	0.255122	0.210578	0.138894	0.149427	0.130764	0.126078	0.179934	0.105719		0.722735	0.0311152	Welch's t-test	0.480338		0.982451	0.112398	student's t-test	0.919514
	35	Malic acid	Mal	C4H6O5	134.022	C00149	HMDB00744	IC/MS	[M ‒ H]‒	7.91 ±0.01	1.63962e+09	7.59463e+08	1.42316e+09	9.5466e+08	6.88216e+08	6.97715e+08	1.29493e+09	1.32821e+09	6.65829e+08	6.43349e+08	8.04108e+08	1.05418e+09		PIPES (IS)	IC/MS	[M ‒ H]‒	9.20379	7.6285	7.79641	6.33139	5.76109	4.24178	6.35475	6.17981	5.20214	7.2382	6.898	5.57537		0.663221	0.781601	student's t-test	0.0258071		1.11134	0.666649	student's t-test	0.348995
	36	Nicotinamide adenine dinucleotide	NAD	C21H27N7O14P2	663.109	C00003	HMDB00902	IC/MS	[M ‒ H]‒	7.33 ±0.04	1.81262e+06	369010	2.06504e+06	1.9784e+06	2.23815e+06	2.22529e+06	2.84695e+06	5.65004e+06	3.37305e+06	2.57106e+06	2.72723e+06	4.67805e+06		PIPES (IS)	IC/MS	[M ‒ H]‒	0.0101749	0.00370655	0.0113128	0.013121	0.0187356	0.0135287	0.0139712	0.026288	0.0263537	0.0289265	0.0233954	0.0247414		1.80142	0.735996	student's t-test	0.0867865		1.15688	0.281273	student's t-test	0.476637
	37	Reduced nicotinamide adenine dinucleotide phosphate	NADPH	C21H30N7O17P3	745.091	C00005	HMDB00221	IC/MS	[M ‒ H]‒	20.33 ±0.01	1.14129e+06	315239	308113	886164	637822	351405	219399	342539	88605.2	102034	297270	263909		PIPES (IS)	IC/MS	[M ‒ H]‒	0.00640646	0.00316644	0.00168792	0.00587712	0.00533923	0.00213638	0.00107668	0.00159374	0.000692275	0.00114797	0.00255012	0.00139577		1.18577	0.82505	student's t-test	0.720817		1.51481	0.535235	student's t-test	0.316795
	38	Phosphoenolpyruvic acid	PEP	C3H5O6P	167.982	C00074	HMDB00263	IC/MS	[M ‒ H]‒	14.39 ±0.01	8.95669e+06	3.10429e+06	1.7995e+07	2.18387e+06	6.66007e+06	1.04249e+07	4.97735e+06	3.08872e+07	1.87985e+07	6.51624e+06	4.76083e+06	2.35543e+07		PIPES (IS)	IC/MS	[M ‒ H]‒	0.0502772	0.0311813	0.0985809	0.0144836	0.0557517	0.0633783	0.024426	0.14371	0.146873	0.073313	0.0408405	0.124575		0.742136	0.728883	student's t-test	0.571743		0.757846	0.53568	student's t-test	0.617928
	39	Phosphoribosyl pyrophosphate	PRPP	C5H13O14P3	389.952	C00119	HMDB00280	IC/MS	[M ‒ H]‒	19.12 ±0.01	229774	0	445311	255465	239499	357894	423941	865977	347296	275587	149757	352149		PIPES (IS)	IC/MS	[M ‒ H]‒	0.00128981	0	0.00243952	0.00169427	0.00200486	0.00217583	0.00208046	0.00402915	0.00271344	0.00310058	0.00128468	0.00186246		1.57534	0.0769497	student's t-test	0.375919		0.708113	0.931049	student's t-test	0.335614
	40	Phosphoric acid	Phosphoric acid	H3O4P	97.9769	C00009	HMDB02142	IC/MS	[M ‒ H]‒	12.1 ±0.02	4.33766e+09	2.1171e+09	3.86354e+09	2.50124e+09	2.48304e+09	3.66268e+09	9.13937e+09	9.76359e+09	5.05922e+09	3.0324e+09	4.13464e+09	7.14459e+09		PIPES (IS)	IC/MS	[M ‒ H]‒	24.3489	21.2654	21.1655	16.5885	20.7856	22.2674	44.8507	45.4273	39.5278	34.1169	35.4688	37.7865		0.893107	0.548077	student's t-test	0.299114		0.827175	0.49124	student's t-test	0.0258455
	41	Pyruvic acid	Pyr	C3H4O3	88.016	C00022	HMDB00243	IC/MS	[M ‒ H]‒	4.12 ±0.01	2.03838e+07	8.74602e+06	2.98124e+07	4.72863e+06	6.94376e+06	2.58098e+07	4.7784e+07	1.09022e+08	7.71379e+07	3.34448e+07	4.02633e+07	6.55766e+07		PIPES (IS)	IC/MS	[M ‒ H]‒	0.114422	0.0878502	0.16332	0.0313607	0.0581265	0.156912	0.234496	0.507249	0.602681	0.37628	0.345397	0.346823		0.673972	0.502	student's t-test	0.418712		0.794763	0.0165114	Welch's t-test	0.492473
	42	Succinic acid	Suc	C4H6O4	118.027	C00042	HMDB00254	IC/MS	[M ‒ H]‒	7.88 ±0.01	1.51399e+08	3.84692e+07	2.13207e+08	6.20456e+07	1.82166e+08	2.79389e+08	5.53263e+07	3.29999e+08	2.25561e+08	1.2184e+08	9.94078e+07	3.48802e+08		PIPES (IS)	IC/MS	[M ‒ H]‒	0.849859	0.386407	1.168	0.411492	1.52492	1.69856	0.271509	1.53539	1.76232	1.37079	0.852764	1.84475		1.51188	0.48109	student's t-test	0.425361		1.13983	0.552322	student's t-test	0.775437
	43	Thiamine pyrophosphate	ThPP	C12H18N4O7P2S	424.037	C00068	HMDB01372	IC/MS	[M ‒ H]‒	21.15 ±0.02	1.21533e+06	531177	828182	757821	626304	845071	285859	439702	266101	182470	227214	336921		PIPES (IS)	IC/MS	[M ‒ H]‒	0.0068221	0.00533546	0.00453699	0.00502594	0.00524282	0.00513764	0.00140283	0.00204581	0.00207905	0.00205293	0.00194915	0.00178192		0.92284	0.0173404	Welch's t-test	0.587516		1.04637	0.228023	student's t-test	0.733312
	44	Uridine 5'-diphosphate	UDP	C9H14N2O12P2	404.002	C00015	HMDB00295	IC/MS	[M ‒ H]‒	19.76 ±0.01	5.76631e+06	4.1137e+06	8.36074e+06	2.93922e+06	5.06327e+06	5.82902e+06	5.65546e+06	8.52684e+06	9.59404e+06	2.96478e+06	4.85183e+06	5.86369e+06		PIPES (IS)	IC/MS	[M ‒ H]‒	0.0323684	0.0413204	0.0458022	0.0194931	0.0423849	0.0354378	0.0277537	0.039673	0.0749585	0.0333561	0.0416212	0.031012		0.814418	0.507023	student's t-test	0.399314		0.744384	0.0980384	student's t-test	0.450797
	45	Uridine 5'-monophosphate	UMP	C9H13N2O9P	324.036	C00105	HMDB00288	IC/MS	[M ‒ H]‒	14.8 ±0.01	8.37572e+07	4.39811e+07	7.83871e+07	4.89697e+07	4.3213e+07	7.6066e+07	9.08119e+07	1.02735e+08	6.47424e+07	4.56261e+07	5.10237e+07	8.42184e+07		PIPES (IS)	IC/MS	[M ‒ H]‒	0.47016	0.441771	0.429424	0.324771	0.361738	0.462446	0.445652	0.477996	0.505834	0.51333	0.437704	0.445417		0.856562	0.158267	student's t-test	0.208982		0.976893	0.687502	student's t-test	0.729292
	46	Uridine 5'-triphosphate	UTP	C9H15N2O15P3	483.969	C00075	HMDB00285	IC/MS	[M ‒ H]‒	23.27 ±0.02	995187	490424	1.67589e+06	439994	733083	696764	596400	1.74278e+06	4.03032e+06	819305	532414	1.0938e+06		PIPES (IS)	IC/MS	[M ‒ H]‒	0.00558635	0.00492611	0.00918097	0.00291808	0.00613667	0.004236	0.00292679	0.00810866	0.031489	0.00921784	0.00456728	0.00578492		0.674882	0.66605	student's t-test	0.257796		0.460207	0.0490038	Welch's t-test	0.47657
	47	Alpha-Hydroxyisobutyric acid	2-Hydroxyisobutyric acid	C4H8O3	104.047	－	HMDB00729	IC/MS	[M ‒ H]‒	3.22 ±0.02	5.63318e+07	3.35978e+07	5.67559e+07	9.17689e+07	1.80267e+08	2.89083e+08	1.48448e+08	1.61402e+08	7.71972e+07	1.30028e+08	2.11443e+08	3.49751e+08		PIPES (IS)	IC/MS	[M ‒ H]‒	0.316211	0.337476	0.310923	0.608619	1.50903	1.75749	0.728495	0.750958	0.603144	1.46292	1.81385	1.84977		4.01731	0.0010806	Welch's t-test	0.108627		2.46161	0.243887	student's t-test	0.00152701
	48	3-Hydroxypropionic acid	3-Hydroxypropionic acid	C3H6O3	90.0317	C01013	HMDB00700	IC/MS	[M ‒ H]‒	3.27 ±0.02	6.97902e+09	3.3654e+09	8.05066e+09	3.05851e+09	3.55084e+09	5.84949e+09	1.47531e+10	1.70327e+10	1.08537e+10	7.09199e+09	8.14266e+09	1.30769e+10		PIPES (IS)	IC/MS	[M ‒ H]‒	39.1758	33.8041	44.1035	20.2843	29.7242	35.5622	72.3994	79.2486	84.8006	79.7906	69.8513	69.1613		0.730852	0.617332	student's t-test	0.121245		0.925373	0.956552	student's t-test	0.301756
	49	2-Hydroxy-3-methylbutyric acid	2-Hydroxyisovaleric acid	C5H10O3	118.063	－	HMDB00407	IC/MS	[M ‒ H]‒	3.91 ±0.01	2.23447e+07	9.89531e+06	1.53855e+07	1.93053e+07	1.8139e+07	2.79525e+07	2.67957e+07	2.66814e+07	1.48701e+07	1.86805e+07	1.85943e+07	3.03583e+07		PIPES (IS)	IC/MS	[M ‒ H]‒	0.125429	0.0993943	0.0842856	0.128035	0.151842	0.169938	0.131498	0.124141	0.11618	0.210171	0.15951	0.16056		1.4552	0.99022	student's t-test	0.0515576		1.42607	0.130873	student's t-test	0.0378717
	50	Methylmalonic acid	Methylmalonic acid	C4H6O4	118.027	C02170	HMDB00202	IC/MS	[M ‒ H]‒	7.88 ±0.01	1.53306e+08	3.84692e+07	2.15578e+08	6.47171e+07	1.82166e+08	2.80057e+08	5.53263e+07	3.30469e+08	2.25073e+08	1.23824e+08	9.94078e+07	3.50168e+08		PIPES (IS)	IC/MS	[M ‒ H]‒	0.860565	0.386407	1.18099	0.429209	1.52492	1.70261	0.271509	1.53758	1.7585	1.39312	0.852764	1.85198		1.50609	0.503001	student's t-test	0.423769		1.14863	0.559658	student's t-test	0.762316
	51	Leucinic acid	Leucinic acid	C6H12O3	132.079	－	HMDB00665	IC/MS	[M ‒ H]‒	4.87 ±0.02	5.42863e+06	2.46704e+06	3.46218e+06	4.12578e+06	3.97335e+06	6.2469e+06	6.04094e+06	6.11566e+06	3.50394e+06	3.75061e+06	4.43942e+06	6.86087e+06		PIPES (IS)	IC/MS	[M ‒ H]‒	0.0304729	0.0247804	0.0189667	0.0273625	0.0332611	0.0379782	0.0296454	0.0284545	0.0273764	0.0421973	0.0380833	0.036286		1.32851	0.921648	student's t-test	0.146812		1.36373	0.24604	student's t-test	0.00516681
	52	Orotic acid	Orotic acid	C5H4N2O4	156.017	C00295	HMDB00226	IC/MS	[M ‒ H]‒	12.35 ±0.01	1.59979e+06	547485	503305	379895	382466	730615	812906	582747	276854	204449	285733	387368		PIPES (IS)	IC/MS	[M ‒ H]‒	0.0089802	0.00549926	0.00275723	0.0025195	0.00320164	0.0044418	0.00398927	0.00271136	0.00216307	0.00230021	0.00245115	0.00204872		0.58961	0.177915	student's t-test	0.279474		0.767183	0.0899014	student's t-test	0.281907
	53	DL-4-Hydroxyphenyllactic acid	4-Hydroxyphenyllactic acid	C9H10O4	182.058	－	HMDB00755	IC/MS	[M ‒ H]‒	12.62 ±0.01	3.69058e+06	2.05667e+06	2.34088e+06	1.99786e+06	2.08411e+06	3.93739e+06	3.10599e+06	2.96376e+06	1.6188e+06	1.38674e+06	1.38744e+06	2.47314e+06		PIPES (IS)	IC/MS	[M ‒ H]‒	0.0207166	0.0206584	0.0128239	0.01325	0.0174462	0.0239375	0.0152424	0.0137896	0.0126477	0.015602	0.0119021	0.01308		1.00802	0.831031	student's t-test	0.97328		0.973714	0.642527	student's t-test	0.796439
	54	2,3-Pyridinedicarboxylic acid	Quinolinic acid	C7H5NO4	167.022	C03722	HMDB00232	IC/MS	[M ‒ H]‒	9.93 ±0.01	191888	0	0	0	0	0	179539	0	0	0	0	0		PIPES (IS)	IC/MS	[M ‒ H]‒	0.00107714	0	0	0	0	0	0.000881074	0	0	0	0	0		0	#DIV/0!	#DIV/0!	#DIV/0!		0	#DIV/0!	#DIV/0!	#DIV/0!
	55	D-Fructose 1-phosphate	F1P	C6H13O9P	260.03	C01094	HMDB60467	IC/MS	[M ‒ H]‒	8.52 ±0.01	2.78319e+06	1.16861e+06	4.97579e+06	1.19876e+06	958705	2.78894e+06	2.38459e+06	2.44143e+06	3.28243e+06	1.24697e+06	1.15986e+06	1.87201e+06		PIPES (IS)	IC/MS	[M ‒ H]‒	0.0156231	0.0117382	0.0272586	0.0079503	0.00802536	0.0169554	0.0117022	0.0113593	0.0256457	0.0140294	0.0099498	0.00990076		0.602914	0.582552	student's t-test	0.261819		0.695585	0.155858	student's t-test	0.370279
	56	D-Galactose 1-phosphate	Ga1P	C6H13O9P	260.03	C03384	HMDB00645	IC/MS	[M ‒ H]‒	6.44 ±0.02	6.959e+06	3.9828e+06	7.54696e+06	3.6503e+06	3.74555e+06	6.14063e+06	8.25538e+06	9.34326e+06	8.13549e+06	4.64509e+06	4.90173e+06	7.66037e+06		PIPES (IS)	IC/MS	[M ‒ H]‒	0.0390634	0.0400056	0.0413441	0.0242091	0.0313542	0.0373322	0.0405126	0.0434716	0.0635629	0.0522609	0.0420492	0.0405144		0.771472	0.0590596	student's t-test	0.0758125		0.913774	0.411692	student's t-test	0.629286
	57	2-Phospho-D-glyceric acid	2-PGA	C3H7O7P	185.993	C00631	HMDB03391	IC/MS	[M ‒ H]‒	12.47 ±0.01	4.01e+07	2.2241e+07	1.07706e+08	1.74529e+07	4.36685e+07	7.12069e+07	2.77288e+07	1.67405e+08	1.41597e+08	5.50759e+07	2.76976e+07	1.27042e+08		PIPES (IS)	IC/MS	[M ‒ H]‒	0.225096	0.223401	0.590041	0.115749	0.365551	0.432905	0.136077	0.778891	1.10631	0.619648	0.237602	0.671904		0.880279	0.769986	student's t-test	0.802986		0.75653	0.374982	student's t-test	0.631233
	58	D-Glucaric acid	Glucaric acid	C6H10O8	210.038	C00818	HMDB29881	IC/MS	[M ‒ H]‒	7.69 ±0.01	7.88235e+07	5.00141e+07	7.93553e+07	4.92902e+07	3.73509e+07	7.30496e+07	4.68021e+07	6.73446e+07	4.93532e+07	2.36026e+07	2.82091e+07	5.26063e+07		PIPES (IS)	IC/MS	[M ‒ H]‒	0.442466	0.502371	0.434728	0.326897	0.312666	0.444107	0.229677	0.313336	0.385598	0.265549	0.24199	0.278226		0.785516	0.417022	student's t-test	0.102832		0.846172	0.105222	student's t-test	0.361731
	59	UDP-alpha-D-galactose	UDP-Galac	C15H24N2O17P2	566.055	C00052	－	IC/MS	[M ‒ H]‒	14.45 ±0.01	760818	386088	476298	455068	349052	518884	351443	411239	229618	143918	191684	295938		PIPES (IS)	IC/MS	[M ‒ H]‒	0.00427075	0.0038781	0.00260928	0.00301805	0.00292193	0.00315457	0.00172468	0.00191338	0.00179401	0.00161919	0.00164435	0.00156517		0.845367	0.0356014	Welch's t-test	0.383961		0.888925	0.304598	student's t-test	0.0283011
	60	D-Mannose 6-phosphate	M6P	C6H13O9P	260.03	C00275	HMDB01078	IC/MS	[M ‒ H]‒	9.49 ±0.01	6.60324e+06	8.26096e+06	1.44217e+07	2.05217e+06	4.56652e+06	8.5754e+06	1.9112e+06	8.26961e+06	1.29792e+07	4.89261e+06	3.24702e+06	4.41603e+06		PIPES (IS)	IC/MS	[M ‒ H]‒	0.0370664	0.0829779	0.0790054	0.0136102	0.0382265	0.0521344	0.00937908	0.0384762	0.101407	0.0550458	0.0278543	0.0233556		0.522338	0.740675	student's t-test	0.161993		0.711872	0.234559	student's t-test	0.645951
	61	3-Hydroxy-3-methylglutaric acid	3-Hydroxymethylglutaric acid	C6H10O5	162.053	C03761	HMDB00355	IC/MS	[M ‒ H]‒	7.49 ±0.01	4.95317e+06	2.44945e+06	5.13118e+06	4.45974e+06	1.96704e+06	7.37779e+06	3.69506e+06	4.49456e+06	1.89134e+06	2.0628e+06	2.23607e+06	2.90335e+06		PIPES (IS)	IC/MS	[M ‒ H]‒	0.027804	0.0246037	0.0281099	0.0295774	0.0164662	0.0448535	0.0181332	0.0209119	0.0147771	0.0232081	0.019182	0.0153553		1.12891	0.0366825	Welch's t-test	0.715312		1.07289	0.759291	student's t-test	0.673167
	62	2-Ketoadipic acid	2-Ketoadipic acid	C6H8O5	160.037	C00322	HMDB00225	IC/MS	[M ‒ H]‒	9.26 ±0.01	0	0	0	0	0	298248	281891	0	151611	0	0	200332		PIPES (IS)	IC/MS	[M ‒ H]‒	0	0	0	0	0	0.00181321	0.00138336	0	0.00118454	0	0	0.00105952		#DIV/0!	#DIV/0!	#DIV/0!	#DIV/0!		0.412603	0.801631	student's t-test	0.418389
	63	D-Glucose	Glucose	C6H12O6	180.16	C00031	HMDB00122	IC/MS	[M ‒ H]‒	2.78 ±0.01	1.59862e+08	1.07845e+08	1.314e+08	6.39322e+07	5.556e+07	1.26927e+08	2.26868e+08	2.07813e+08	1.78414e+08	1.0952e+08	9.73224e+07	1.59436e+08		PIPES (IS)	IC/MS	[M ‒ H]‒	0.897365	1.08326	0.719841	0.424004	0.465095	0.771658	1.11333	0.966894	1.39395	1.23219	0.834875	0.843231		0.61499	0.955651	student's t-test	0.0844744		0.837692	0.954977	student's t-test	0.358462
	64	Thymidine	Thymidine	C10H14N2O5	242.09	C00214	HMDB00273	IC/MS	[M ‒ H]‒	5.29 ±0.01	1.25897e+06	714794	1.04971e+06	709893	563471	825402	1.20409e+06	1.28539e+06	898349	620925	594718	727264		PIPES (IS)	IC/MS	[M ‒ H]‒	0.00706706	0.00717981	0.00575059	0.00470807	0.00471684	0.00501806	0.00590899	0.00598054	0.00701883	0.0069859	0.00510176	0.00384637		0.722241	0.0940307	student's t-test	0.016963		0.842698	0.267658	student's t-test	0.369046
	65	Uracil	Uracil	C4H4N2O2	112.027	C00106	HMDB00300	IC/MS	[M ‒ H]‒	5.56 ±0.02	3.89782e+06	1.55375e+06	1.5604e+06	1.96706e+06	2.11487e+06	2.08864e+06	2.93334e+06	2.83299e+06	1.24235e+06	1.56982e+06	1.70892e+06	1.86154e+06		PIPES (IS)	IC/MS	[M ‒ H]‒	0.0218799	0.0156067	0.00854827	0.0130457	0.0177036	0.0126979	0.0143951	0.0131811	0.00970652	0.0176618	0.0146599	0.00984537		0.943789	0.298769	student's t-test	0.846421		1.13101	0.551632	student's t-test	0.575657
	66	Uridine	Uridine	C9H12N2O6	244.07	C00299	HMDB00296	IC/MS	[M ‒ H]‒	5.94 ±0.01	2.29363e+07	1.69332e+07	1.32745e+07	1.49457e+07	1.22544e+07	1.51022e+07	1.03568e+07	1.21761e+07	7.7638e+06	7.17285e+06	7.22557e+06	7.46314e+06		PIPES (IS)	IC/MS	[M ‒ H]‒	0.12875	0.170087	0.0727211	0.0991213	0.102582	0.0918142	0.050825	0.0566522	0.0606588	0.0807003	0.0619841	0.0394713		0.789964	0.0249936	Welch's t-test	0.454205		1.08338	0.108528	student's t-test	0.722363
	67	O-Acetyl-L-homoserine	O-Acetyl-homoSer	C6H11NO4	161.069	C01077	HMDB29423	IC/MS	[M ‒ H]‒	3.04 ±0.01	7.63853e+06	2.63324e+06	3.52262e+06	1.66797e+06	1.71467e+06	5.31349e+06	8.53051e+06	9.88943e+06	5.33031e+06	2.61378e+06	3.3726e+06	6.64576e+06		PIPES (IS)	IC/MS	[M ‒ H]‒	0.0428779	0.0264498	0.0192978	0.0110621	0.0143536	0.0323035	0.0418628	0.0460127	0.0416459	0.0294071	0.0289317	0.0351483		0.651271	0.944129	student's t-test	0.343948		0.721788	0.671866	student's t-test	0.00804542
	68	Acetylglycine	Acetyl-Gly	C4H7NO3	117.043	－	HMDB00532	IC/MS	[M ‒ H]‒	3.1 ±0.01	1.49688e+07	7.01003e+06	1.2893e+07	8.03379e+06	1.00872e+07	1.85188e+07	1.40431e+07	1.84041e+07	1.03861e+07	6.906e+06	1.08538e+07	1.82339e+07		PIPES (IS)	IC/MS	[M ‒ H]‒	0.0840255	0.0704129	0.0706308	0.0532808	0.0844403	0.112586	0.0689155	0.0856292	0.081147	0.0776981	0.0931083	0.0964359		1.11213	0.129239	student's t-test	0.659533		1.13386	0.85639	student's t-test	0.240316
	69	Isovalerylglycine	IsovalerylGly	C7H13NO3	159.09	－	HMDB00678	IC/MS	[M ‒ H]‒	3.79 ±0.01	3.53648e+06	952973	412039	435068	348075	1.04486e+06	1.9888e+06	719553	224854	265318	308920	457869		PIPES (IS)	IC/MS	[M ‒ H]‒	0.0198516	0.00957222	0.00225725	0.00288541	0.00291375	0.00635225	0.00975989	0.00334788	0.00175679	0.00298504	0.00265005	0.00242159		0.383555	0.0968092	student's t-test	0.281276		0.542007	0.00890933	Welch's t-test	0.451592
	70	N-Acetyl-L-aspartic acid	N-Acetyl-Asp	C6H9NO5	175.048	C01042	HMDB00812	IC/MS	[M ‒ H]‒	6.99 ±0.07	3.48469e+07	2.41029e+07	7.53954e+07	5.35696e+07	1.74158e+07	8.94671e+07	3.3971e+07	7.1236e+07	2.43695e+07	2.20347e+07	2.42698e+07	3.46961e+07		PIPES (IS)	IC/MS	[M ‒ H]‒	0.195609	0.242104	0.413035	0.355279	0.145789	0.543918	0.16671	0.331441	0.1904	0.247908	0.208197	0.183502		1.22831	0.496813	student's t-test	0.65098		0.928918	0.234954	student's t-test	0.780493
	71	N-Acetyl-L-leucine	N-Acetyl-Leu	C8H15NO3	173.105	C02710	HMDB11756	IC/MS	[M ‒ H]‒	3.78 ±0.06	1.00081e+06	545747	469280	605881	460816	937779	742521	723307	412791	422550	501298	835673		PIPES (IS)	IC/MS	[M ‒ H]‒	0.00561794	0.0054818	0.00257083	0.00401826	0.00385751	0.00570126	0.00364386	0.00336534	0.00322515	0.00475403	0.00430036	0.00441973		0.993158	0.520723	student's t-test	0.979767		1.31656	0.901926	student's t-test	0.00414541
	72	Allantoin	Allantoin	C4H6N4O3	158.044	C01551	HMDB00462	IC/MS	[M ‒ H]‒	3.75 ±0.02	4.53355e+07	2.65161e+07	2.56294e+07	2.50848e+07	2.31526e+07	3.28176e+07	3.79767e+07	3.59824e+07	2.40239e+07	2.23799e+07	2.39175e+07	2.92908e+07		PIPES (IS)	IC/MS	[M ‒ H]‒	0.254485	0.266343	0.140404	0.166365	0.193812	0.199516	0.186367	0.167416	0.187699	0.251791	0.205175	0.154914		0.846437	0.121996	student's t-test	0.459843		1.13001	0.103971	student's t-test	0.459906
	73	Taurine	Taurine	C2H7NO3S	125.015	C00245	HMDB00251	IC/MS	[M ‒ H]‒	3.42 ±0.02	7.02984e+09	4.17584e+09	6.46529e+09	4.75483e+09	4.6513e+09	6.15969e+09	7.6787e+09	8.28804e+09	6.20333e+09	4.50153e+09	5.30528e+09	7.11803e+09		PIPES (IS)	IC/MS	[M ‒ H]‒	39.4611	41.9446	35.4185	31.5345	38.9362	37.448	37.6826	38.5619	48.4668	50.6458	45.511	37.646		0.92377	0.828938	student's t-test	0.371805		1.0729	0.911005	student's t-test	0.585957
	74	N-Acetyl-DL-alanine	N-Acetyl-Ala	C5H9NO3	131.058	－	HMDB00766	IC/MS	[M ‒ H]‒	3.08 ±0.04	3.10827e+06	1.47747e+06	2.43222e+06	1.61079e+06	1.52285e+06	3.00112e+06	3.16098e+06	3.79345e+06	2.33537e+06	1.88715e+06	2.07568e+06	3.34396e+06		PIPES (IS)	IC/MS	[M ‒ H]‒	0.0174479	0.0148406	0.0133243	0.0106829	0.0127478	0.0182454	0.0155123	0.0176499	0.0182463	0.021232	0.0178061	0.0176856		0.913695	0.443217	student's t-test	0.634992		1.10339	0.675254	student's t-test	0.282629
	75	N-Acetyl-L-glutamine	N-Acetyl-Gln	C7H12N2O4	188.08	－	HMDB06029	IC/MS	[M ‒ H]‒	2.91 ±0.01	3.03389e+06	709823	594731	504552	360379	944168	1.57557e+06	1.14048e+06	366303	238619	315741	540903		PIPES (IS)	IC/MS	[M ‒ H]‒	0.0170303	0.00712988	0.00325809	0.00334623	0.00301675	0.0057401	0.00773197	0.00530632	0.00286194	0.00268466	0.00270857	0.00286074		0.441423	0.0839131	student's t-test	0.289975		0.51911	0.0030723	Welch's t-test	0.211364
	76	O-Phospho-L-serine	O-Phospho-Ser	C3H8NO6P	185.009	C01005	HMDB01721	IC/MS	[M ‒ H]‒	11.65 ±0.01	431184	335922	462898	339925	305030	392777	323173	315922	276868	198449	220965	260963		PIPES (IS)	IC/MS	[M ‒ H]‒	0.0024204	0.0033742	0.00253587	0.00225441	0.00255342	0.0023879	0.00158594	0.0014699	0.00216318	0.00223271	0.00189553	0.00138019		0.863786	0.152933	student's t-test	0.293079		1.05546	0.855808	student's t-test	0.783123
	77	O-Succinyl-L-homoserine	O-Succinyl-homoSer	C8H13NO6	219.074	C01118	－	IC/MS	[M ‒ H]‒	6.6 ±0.04	619695	140706	124681	119998	74981.5	286729	533133	191517	81990.6	0	95610.1	183202		PIPES (IS)	IC/MS	[M ‒ H]‒	0.00347858	0.00141334	0.000683032	0.000795837	0.000627673	0.00174318	0.00261631	0.000891077	0.000640595	0	0.000820186	0.000968922		0.568021	0.293578	student's t-test	0.425776		0.43132	0.380968	student's t-test	0.318239
	78	1,6-Anhydro-beta-D-glucose	Levoglucosan	C6H10O5	162.053	－	HMDB00640	IC/MS	[M ‒ H]‒	2.79 ±0.01	2.9643e+07	2.04857e+07	2.31585e+07	1.2174e+07	1.01182e+07	2.21964e+07	4.29042e+07	3.52954e+07	3.32842e+07	1.89793e+07	1.73737e+07	2.7484e+07		PIPES (IS)	IC/MS	[M ‒ H]‒	0.166397	0.20577	0.126868	0.080739	0.0847002	0.134944	0.210549	0.16422	0.260051	0.213532	0.149039	0.145358		0.601928	0.739474	student's t-test	0.082214		0.800116	0.780551	student's t-test	0.298566
	79	L-Arabinose	Arabinose	C5H10O5	150.053	C00259	HMDB00646	IC/MS	[M ‒ H]‒	2.79 ±0.01	4.83797e+06	2.7751e+06	3.64968e+06	1.98285e+06	1.76698e+06	3.43443e+06	6.49201e+06	5.532e+06	4.86875e+06	2.87811e+06	2.67614e+06	4.51189e+06		PIPES (IS)	IC/MS	[M ‒ H]‒	0.0271573	0.0278747	0.0199939	0.0131505	0.0147915	0.0208797	0.031859	0.0257389	0.0380397	0.032381	0.0229571	0.0238626		0.650732	0.932367	student's t-test	0.0642136		0.828134	0.833554	student's t-test	0.303975
	80	D-Arabitol	Arabitol	C5H12O5	152.068	C01904	HMDB00568	IC/MS	[M ‒ H]‒	2.66 ±0.02	1.87508e+07	7.03103e+06	2.56062e+07	7.50757e+06	6.72659e+06	2.49043e+07	1.24708e+07	1.43213e+07	1.70285e+07	5.31676e+06	6.97843e+06	1.63435e+07		PIPES (IS)	IC/MS	[M ‒ H]‒	0.105255	0.0706238	0.140277	0.0497908	0.0563086	0.151406	0.0611997	0.0666331	0.133045	0.0598179	0.0598641	0.0864378		0.814488	0.54535	student's t-test	0.638369		0.790102	0.25685	student's t-test	0.501578
	81	meso-Erythritol	meso-Erythritol	C4H10O4	122.058	－	HMDB02994	IC/MS	[M ‒ H]‒	2.66 ±0.01	340083	131947	203888	113365	112589	150036	304834	328547	145758	96365.6	147767	190964		PIPES (IS)	IC/MS	[M ‒ H]‒	0.00190901	0.00132535	0.00111695	0.000751847	0.000942487	0.000912147	0.00149595	0.00152864	0.00113881	0.00108419	0.00126761	0.00100997		0.59901	0.117198	student's t-test	0.0759421		0.80746	0.546611	student's t-test	0.142143
	82	Galactitol	Galactitol	C6H14O6	182.079	C01697	HMDB00107	IC/MS	[M ‒ H]‒	2.64 ±0.01	1.75589e+07	8.54639e+06	1.59401e+07	9.31007e+06	9.76088e+06	1.35431e+07	1.67406e+07	1.77483e+07	9.93743e+06	6.75043e+06	9.04981e+06	1.3699e+07		PIPES (IS)	IC/MS	[M ‒ H]‒	0.0985646	0.0858449	0.0873236	0.0617452	0.0817087	0.0823359	0.0821531	0.082578	0.0776414	0.0759478	0.0776333	0.0724514		0.830925	0.521605	student's t-test	0.123333		0.932583	0.965591	student's t-test	0.068212
	83	Glycerol	Glycerol	C3H8O3	92.0473	C00116	HMDB00131	IC/MS	[M ‒ H]‒	2.68 ±0.02	3.55743e+06	1.34066e+06	8.44811e+06	618291	706017	8.94674e+06	1.53569e+06	2.36328e+06	4.42803e+06	743925	1.103e+06	3.35086e+06		PIPES (IS)	IC/MS	[M ‒ H]‒	0.0199692	0.0134663	0.0462809	0.00410056	0.0059101	0.054392	0.0075363	0.0109957	0.0345964	0.00836975	0.00946201	0.0177221		0.807897	0.541165	student's t-test	0.804326		0.669207	0.215197	student's t-test	0.550619
	84	Lactitol	Lactitol	C12H24O11	344.132	C13542	HMDB40937	IC/MS	[M ‒ H]‒	2.62 ±0.01	5.62419e+06	2.61214e+06	5.48479e+06	3.04601e+06	2.6397e+06	4.7087e+06	1.8503e+06	2.33905e+06	1.31651e+06	808424	939106	1.81188e+06		PIPES (IS)	IC/MS	[M ‒ H]‒	0.0315707	0.0262379	0.0300471	0.0202014	0.022097	0.0286267	0.00908019	0.0108829	0.0102859	0.00909542	0.00805607	0.00958273		0.807292	0.557223	student's t-test	0.133534		0.883804	0.837903	student's t-test	0.167389
	85	Beta-Lactose	Beta-Lactose	C12H22O11	342.116	C01970	HMDB41627	IC/MS	[M ‒ H]‒	2.78 ±0.06	1.09529e+07	8.87457e+06	8.18595e+06	4.20207e+06	3.64844e+06	6.95039e+06	1.18355e+07	8.94225e+06	8.75942e+06	4.0272e+06	4.13062e+06	7.01541e+06		PIPES (IS)	IC/MS	[M ‒ H]‒	0.0614829	0.0891414	0.0448447	0.0278685	0.0305413	0.0422551	0.0580816	0.0416058	0.0684376	0.0453093	0.0354343	0.0371033		0.514992	0.209417	student's t-test	0.0816204		0.700948	0.264775	student's t-test	0.116362
	86	D-Erythrose	Erythrose	C4H8O4	120.042	C01796	HMDB02649	IC/MS	[M ‒ H]‒	2.79 ±0.01	1.99971e+07	1.25245e+07	1.48925e+07	7.68344e+06	6.67441e+06	1.5038e+07	3.0523e+07	2.67819e+07	2.3782e+07	1.42911e+07	1.2776e+07	2.13104e+07		PIPES (IS)	IC/MS	[M ‒ H]‒	0.112251	0.125804	0.0815849	0.0509573	0.0558718	0.0914239	0.149789	0.124609	0.18581	0.160787	0.109598	0.112707		0.620238	0.974399	student's t-test	0.091089		0.832433	0.93073	student's t-test	0.34958
	87	N2-Acetyl-L-asparagine	N-Acetyl-Asn	C6H10N2O4	174.064		HMDB06028	IC/MS	[M ‒ H]‒	2.94 ±0.02	638056	190008	260099	157085	155766	354096	403786	336358	147289	105923	139083	229064		PIPES (IS)	IC/MS	[M ‒ H]‒	0.00358164	0.00190855	0.00142489	0.0010418	0.00130393	0.00215274	0.00198155	0.00156498	0.00115078	0.00119172	0.00119312	0.00121148		0.650529	0.41684	student's t-test	0.334298		0.765612	0.00140893	Welch's t-test	0.26554
	88	Pantothenate	Pantothenate	C9H17NO5	219.111	C00864	HMDB00210	IC/MS	[M ‒ H]‒	3.29 ±0.02	1.50521e+07	4.80328e+06	8.08096e+06	1.39554e+07	1.38958e+07	1.91246e+07	8.8032e+06	7.68352e+06	4.35539e+06	4.75053e+06	6.40027e+06	7.7986e+06		PIPES (IS)	IC/MS	[M ‒ H]‒	0.0844932	0.048247	0.0442695	0.0925535	0.116323	0.116269	0.043201	0.0357493	0.0340288	0.0534472	0.0549044	0.0412454		1.83687	0.553326	student's t-test	0.0304492		1.32411	0.594003	student's t-test	0.0773915
	89	D-Sorbitol 6-phosphate	Sorbitol-6P	C6H15O9P	262.045	C01096	HMDB05831	IC/MS	[M ‒ H]‒	6.38 ±0.01	1.27146e+06	533844	1.1819e+06	635335	680998	900645	2.77638e+06	1.74274e+06	1.17968e+06	1.38994e+06	1.13543e+06	1.57485e+06		PIPES (IS)	IC/MS	[M ‒ H]‒	0.00713715	0.00536224	0.00647476	0.0042136	0.00570066	0.0054755	0.0136249	0.00810848	0.00921691	0.015638	0.00974024	0.00832908		0.811091	0.888001	student's t-test	0.160467		1.08908	0.72321	student's t-test	0.75934
	90	Uridine 5’-diphosphate (UDP)-D-glucuronate	UDP-glucuronate	C15H22N2O18P2	580.034	C00167	HMDB00935	IC/MS	[M ‒ H]‒	20.57 ±0.02	308811	129357	338415	165111	123990	210596	234405	284584	189627	0	101095	147564		PIPES (IS)	IC/MS	[M ‒ H]‒	0.00173347	0.00129934	0.00185392	0.00109503	0.00103793	0.00128032	0.00115032	0.00132409	0.00148156	0	0.000867236	0.000780442		0.69848	0.31752	student's t-test	0.0555264		0.416504	0.214828	student's t-test	0.0578114
	91	UDP-N-acetyl-alpha-D-glucosamine	UDP-N-acetyl-glucosamine	C17H27N3O17P2	607.082	C00043	HMDB00290	IC/MS	[M ‒ H]‒	13.65 ±0.13	1.21751e+07	6.68991e+06	9.98902e+06	6.88074e+06	5.30301e+06	1.09795e+07	8.19285e+06	1.07725e+07	6.64022e+06	4.26346e+06	4.7256e+06	7.59203e+06		PIPES (IS)	IC/MS	[M ‒ H]‒	0.0683435	0.0671974	0.0547223	0.0456337	0.0443917	0.0667499	0.0402057	0.0501213	0.0518802	0.0479674	0.0405383	0.0401529		0.823992	0.53105	student's t-test	0.257707		0.904726	0.657447	student's t-test	0.366149
	92	Inosine 5'-triphosphate	ITP	C10H15N4O14P3	507.98	C00081	HMDB00189	IC/MS	[M ‒ H]‒	25.97 ±0.01	0	0	0	0	0	0	0	0	144704	0	0	0		PIPES (IS)	IC/MS	[M ‒ H]‒	0	0	0	0	0	0	0	0	0.00113058	0	0	0		#DIV/0!	#DIV/0!	#DIV/0!	#DIV/0!		0	#DIV/0!	#DIV/0!	#DIV/0!
	93	2,3-Bisphosphoglycerate	2,3-BPG	C3H8O10P2	265.959	C03339	HMDB01294	IC/MS	[M ‒ H]‒	18.89 ±0.01	3.42639e+06	1.20114e+06	4.18496e+06	3.33962e+06	1.98014e+06	3.874e+06	2.58463e+06	5.44594e+06	3.67379e+06	2.91089e+06	1.22695e+06	3.07184e+06		PIPES (IS)	IC/MS	[M ‒ H]‒	0.0192336	0.012065	0.0229263	0.0221487	0.0165759	0.0235521	0.0126839	0.0253384	0.0287034	0.0327498	0.0105253	0.0162464		1.14849	0.617287	student's t-test	0.52255		0.892034	0.697718	student's t-test	0.785631
	94	Inosine 5'-diphosphate	IDP	C10H14N4O11P2	428.013	C00104	HMDB03335	IC/MS	[M ‒ H]‒	22.75 ±0.01	0	0	101810	0	0	0	230563	222639	218251	113962	157561	130001		PIPES (IS)	IC/MS	[M ‒ H]‒	0	0	0.00055774	0	0	0	0.00113147	0.00103588	0.0017052	0.00128216	0.00135163	0.000687551		0	#DIV/0!	#DIV/0!	#DIV/0!		0.857664	0.991743	student's t-test	0.569404
	95	2-Dehydro-D-gluconate	2-Dehydrogluconate	C6H10O7	194.043	C06473	HMDB11732	IC/MS	[M ‒ H]‒	3.74 ±0.02	450611	160130	168327	92740.4	0	167939	129864	177618	0	0	0	0		PIPES (IS)	IC/MS	[M ‒ H]‒	0.00252945	0.00160844	0.000922138	0.000615062	0	0.00102099	0.000637295	0.000826407	0	0	0	0		0.323329	0.577785	student's t-test	0.107602		0	#DIV/0!	#DIV/0!	#DIV/0!
	96	1,5-Anhydro-D-glucitol	1,5-AG	C6H12O5	164.068	C07326	HMDB02712	IC/MS	[M ‒ H]‒	2.68 ±0.03	2.32112e+06	1.14273e+06	1.934e+06	233916	283139	272641	3.15346e+06	4.04812e+06	2.05791e+06	161709	283619	389855		PIPES (IS)	IC/MS	[M ‒ H]‒	0.0130293	0.0114782	0.0105949	0.00155135	0.00237017	0.00165753	0.0154754	0.0188348	0.0160785	0.00181936	0.00243301	0.00206187		0.158936	0.230945	student's t-test	0.000201535		0.125311	0.0578353	student's t-test	0.000150971
	97	1-Kestose	1-Kestose	C18H32O16	504.169	－	HMDB11729	IC/MS	[M ‒ H]‒	2.87 ±0.01	4.40593e+06	4.48945e+06	3.85916e+06	1.4277e+06	1.36701e+06	3.16018e+06	5.15071e+06	3.3329e+06	4.8644e+06	1.98856e+06	2.01128e+06	2.01128e+06		PIPES (IS)	IC/MS	[M ‒ H]‒	0.0247321	0.0450947	0.0211414	0.00946862	0.0114433	0.0192124	0.0252767	0.015507	0.0380057	0.0223729	0.0172536	0.0106373		0.441081	0.274367	student's t-test	0.102405		0.637951	0.427654	student's t-test	0.265207
	98	Pyridoxal 5'-phosphate	Pyridoxal-5P	C8H10NO6P	247.025	C00018	HMDB01491	IC/MS	[M ‒ H]‒	17.65 ±0.03	1.6563e+06	872747	1.66102e+06	1.10353e+06	1.2189e+06	1.42244e+06	749857	799339	1.12606e+06	1.06954e+06	1.10027e+06	911792		PIPES (IS)	IC/MS	[M ‒ H]‒	0.00929743	0.00876638	0.00909947	0.00731868	0.0102034	0.0086478	0.00367986	0.0037191	0.00879797	0.0120331	0.00943857	0.00482231		0.96343	0.066792	student's t-test	0.716055		1.62339	0.787575	student's t-test	0.281841
	99	N-Acetyl-D-glucosamine 1-phosphate	N-Acetyl-glucosamine-1P	C8H16NO9P	301.056	C04256	HMDB01367	IC/MS	[M ‒ H]‒	6.21 ±0.01	102964	35529.5	80085.4	0	0	97428.8	0	0	0	0	0	0		PIPES (IS)	IC/MS	[M ‒ H]‒	0.000577976	0.000356879	0.000438728	0	0	0.000592322	0	0	0	0	0	0		0.431224	0.193064	student's t-test	0.278224		#DIV/0!	#DIV/0!	#DIV/0!	#DIV/0!
	100	Ketoleucine	Ketoleucine	C6H10O3	130.063	－	HMDB00695	IC/MS	[M ‒ H]‒	7.8 ±0.01	952290	480991	852093	643797	1.1913e+06	2.56707e+06	1.44583e+07	1.46565e+07	1.01492e+07	6.23546e+06	8.35895e+06	2.52334e+07		PIPES (IS)	IC/MS	[M ‒ H]‒	0.00534556	0.00483136	0.00466798	0.00426972	0.00997244	0.0156066	0.0709527	0.0681924	0.0792957	0.070154	0.0717068	0.133455		2.01071	0.00775245	Welch's t-test	0.265786		1.26037	0.0499845	Welch's t-test	0.459958
	101	N-Acetyl-L-glutamate	N-Acetyl-Glu	C7H11NO5	189.064	C00624	HMDB01138	IC/MS	[M ‒ H]‒	6.83 ±0.01	3.66239e+06	1.06458e+06	2.34056e+06	2.46271e+06	847467	3.57124e+06	1.45832e+06	2.05619e+06	676438	749800	815338	1.05961e+06		PIPES (IS)	IC/MS	[M ‒ H]‒	0.0205584	0.0106932	0.0128222	0.0163329	0.00709418	0.0217115	0.0071566	0.00956688	0.00528503	0.00843585	0.00699433	0.00560409		1.02416	0.660479	student's t-test	0.949009		0.955734	0.606391	student's t-test	0.837566
	102	Creatine phosphate	Creatine phosphate	C4H10N3O5P	211.036	C02305	HMDB01511	IC/MS	[M ‒ H]‒	5.67 ±0.03	1.59373e+07	9.03009e+06	4.12254e+06	8.56576e+06	7.90467e+06	5.1996e+06	8.61098e+06	2.14121e+07	8.14031e+06	5.32114e+06	3.20883e+06	7.39583e+06		PIPES (IS)	IC/MS	[M ‒ H]‒	0.0894618	0.0907036	0.0225843	0.0568089	0.0661703	0.0316111	0.0422577	0.0996244	0.0636005	0.0598671	0.0275268	0.0391152		0.762469	0.34754	student's t-test	0.552035		0.615668	0.484094	student's t-test	0.242821
	103	N-Carbamoyl-L-aspartate	N-Carbamoyl-Asp	C5H8N2O5	176.043	C00438	HMDB00828	IC/MS	[M ‒ H]‒	7.53 ±0.01	152798	0	102310	84716.1	0	66840.5	72482.9	64413	0	0	0	63850.4		PIPES (IS)	IC/MS	[M ‒ H]‒	0.00085771	0	0.000560479	0.000561845	0	0.000406359	0.000355704	0.000299696	0	0	0	0.000337694		0.682704	0.614651	student's t-test	0.645618		0.515248	0.980797	student's t-test	0.538625
	104	2'-Deoxyuridine	Deoxyuridine	C9H12N2O5	228.075	C00526	HMDB00012	IC/MS	[M ‒ H]‒	4.76 ±0.01	1.37291e+06	733449	1.14417e+06	651422	595773	870853	1.42479e+06	1.58797e+06	1.06535e+06	590198	607995	904750		PIPES (IS)	IC/MS	[M ‒ H]‒	0.00770666	0.00736719	0.00626804	0.00432029	0.00498724	0.00529438	0.00699205	0.00738838	0.0083236	0.0066402	0.00521565	0.00478507		0.684191	0.609715	student's t-test	0.0125029		0.73295	0.662988	student's t-test	0.0420607
	105	Maltotetraose	Maltotetraose	C24H42O21	666.222	C02052	HMDB01296	IC/MS	[M ‒ H]‒	2.94 ±0.03	2.38672e+06	2.29108e+06	2.23596e+06	977800	947653	2.26864e+06	3.2728e+06	2.42544e+06	3.28378e+06	1.48543e+06	1.39747e+06	1.36988e+06		PIPES (IS)	IC/MS	[M ‒ H]‒	0.0133975	0.0230129	0.0122492	0.00648486	0.00793284	0.0137923	0.016061	0.0112849	0.0256562	0.0167122	0.0119881	0.00724503		0.579741	0.599934	student's t-test	0.17		0.678187	0.589842	student's t-test	0.321724
	106	Adenylosuccinic acid	Succinyl AMP	C14H18N5O11P	463.074	C03794	HMDB00536	IC/MS	[M ‒ H]‒	19.54 ±0.01	3.04267e+07	5.65352e+06	4.03755e+07	3.14573e+07	1.54473e+07	1.46252e+07	1.32509e+07	3.87918e+07	1.53736e+07	1.86739e+07	1.43927e+07	3.20848e+07		PIPES (IS)	IC/MS	[M ‒ H]‒	0.170796	0.0567873	0.221187	0.208628	0.12931	0.0889141	0.0650277	0.180487	0.120114	0.210096	0.123467	0.169691		0.951159	0.686667	student's t-test	0.908968		1.37641	0.720741	student's t-test	0.33293
	107	5-aminoimidazole-4-carboxamide-1-β-D-ribofuranosyl 5'-monophosphate	AICARP	C9H15N4O8P	338.063	－	－	IC/MS	[M ‒ H]‒	10.3 ±0.01	235686	187841	205049	141646	95820.5	193365	735545	455917	262834	137001	229255	248536		PIPES (IS)	IC/MS	[M ‒ H]‒	0.00132299	0.00188679	0.00112331	0.000939407	0.000802117	0.00117557	0.00360963	0.00212126	0.00205353	0.00154137	0.00196665	0.00131446		0.673213	0.3708	student's t-test	0.135844		0.619505	0.248235	student's t-test	0.142931
	108	Alpha-D-Glucosamine 1-phosphate	Glucosamine 1P	C6H14NO8P	259.046	C06156	HMDB01109	IC/MS	[M ‒ H]‒	6.18 ±0.21	4.28543e+06	729576	1.08481e+06	288144	624124	985987	2.26788e+06	2.14324e+06	6.47903e+06	669384	815512	909660		PIPES (IS)	IC/MS	[M ‒ H]‒	0.0240557	0.00732829	0.00594287	0.001911	0.00522457	0.00599434	0.0111294	0.0099719	0.0506208	0.00753111	0.00699583	0.00481103		0.351755	0.0885388	student's t-test	0.24697		0.269623	0.00772461	Welch's t-test	0.321165
	109	2-Methylhippuric acid	2-Methylhippuric acid	C10H11NO3	193.074	－	HMDB11723	IC/MS	[M ‒ H]‒	7.6 ±0.01	6.05876e+06	3.02116e+06	780249	549935	600274	1.83694e+06	3.49928e+06	2.2151e+06	372124	314015	381235	623198		PIPES (IS)	IC/MS	[M ‒ H]‒	0.03401	0.0303463	0.0042744	0.00364722	0.00502492	0.0111677	0.0171724	0.0103063	0.00290741	0.00353293	0.0032704	0.00329599		0.289082	0.114953	student's t-test	0.166942		0.332366	0.000822991	Welch's t-test	0.242305
	110	Ketoisoleucine	Ketoisoleucine	C6H10O3	130.063	－	－	IC/MS	[M ‒ H]‒	7.3 ±0.01	737868	477978	793479	553155	998312	2.25984e+06	1.2628e+07	1.25599e+07	8.77132e+06	4.94412e+06	7.45641e+06	2.22511e+07		PIPES (IS)	IC/MS	[M ‒ H]‒	0.00414193	0.00480109	0.00434688	0.00366858	0.00835691	0.0137388	0.0619709	0.0584375	0.0685306	0.0556253	0.0639644	0.117682		1.93863	0.00892353	Welch's t-test	0.288919		1.25581	0.0452024	Welch's t-test	0.495494
	111	Alpha-Ketovaline	2-Ketoisovaleric acid	C5H8O3	116.047	C00141	HMDB00019	IC/MS	[M ‒ H]‒	5.61 ±0.01	877685	688950	999732	874853	1.11814e+06	2.30937e+06	8.72557e+06	1.08792e+07	8.80568e+06	5.05961e+06	5.93523e+06	1.79387e+07		PIPES (IS)	IC/MS	[M ‒ H]‒	0.00492677	0.00692022	0.00547678	0.0058021	0.00936	0.0140399	0.0428201	0.0506179	0.0687991	0.0569247	0.050915	0.0948746		1.68566	0.116931	student's t-test	0.182554		1.2495	0.476542	student's t-test	0.440387
	112	L-Cysteinesulfinic acid	Cysteinesulfinic acid	C3H7NO4S	153.01	C00606	HMDB00996	IC/MS	[M ‒ H]‒	7.3 ±0.01	1.72896e+06	898278	1.14883e+06	1.21663e+06	759963	1.06914e+06	2.30233e+06	2.28116e+06	1.75365e+06	1.33082e+06	1.43664e+06	1.86223e+06		PIPES (IS)	IC/MS	[M ‒ H]‒	0.00970529	0.00902283	0.00629358	0.00806877	0.00636168	0.00649985	0.0112985	0.0106136	0.0137013	0.0149727	0.0123241	0.009849		0.836486	0.432461	student's t-test	0.311151		1.04303	0.571922	student's t-test	0.784957
	113	L-Cysteic acid	Cysteic acid	C3H7NO5S	169.004	C00506	HMDB02757	IC/MS	[M ‒ H]‒	8.72 ±0.01	333900	158820	287491	204694	146418	206032	369752	342932	101766	94850.7	156789	181854		PIPES (IS)	IC/MS	[M ‒ H]‒	0.0018743	0.00159528	0.00157495	0.00135755	0.00122567	0.00125258	0.00181453	0.00159557	0.000795104	0.00106715	0.001345	0.000961794		0.760387	0.295758	student's t-test	0.0182842		0.802327	0.239578	student's t-test	0.448665
	114	Pyrophosphate	Pyrophosphate	H4P2O7	177.943	C00013	HMDB00250	IC/MS	[M ‒ H]‒	12.1 ±0.02	5.63839e+08	2.80109e+08	5.08552e+08	3.36391e+08	3.33664e+08	4.91255e+08	1.04436e+09	1.04962e+09	6.29585e+08	3.9863e+08	5.30968e+08	8.28781e+08		PIPES (IS)	IC/MS	[M ‒ H]‒	3.16503	2.81358	2.78598	2.23098	2.79312	2.9866	5.12509	4.88357	4.91897	4.4849	4.55488	4.38328		0.913984	0.449466	student's t-test	0.384161		0.899209	0.608821	student's t-test	0.00514146
	115	N-Acetyl-D-glucosamine 6-phosphate	N-Acetyl-glucosamine-6P	C8H16NO9P	301.056	C00357	HMDB01062	IC/MS	[M ‒ H]‒	9.02 ±0.01	4.29077e+06	2.66935e+06	2.09482e+06	2.16545e+06	1.84803e+06	3.0567e+06	2.57752e+06	2.48807e+06	1.58891e+06	1.24862e+06	1.24377e+06	1.61941e+06		PIPES (IS)	IC/MS	[M ‒ H]‒	0.0240857	0.0268125	0.0114759	0.0143614	0.0154699	0.0185833	0.012649	0.0115763	0.0124142	0.0140479	0.0106696	0.00856478		0.776199	0.133582	student's t-test	0.395194		0.908374	0.0797971	student's t-test	0.530073
	116	Dihydroxyacetone phosphate	DHAP	C3H7O6P	169.998	C00111	HMDB01473	PFPP-LC/MS	[M ‒ H]‒	1.33 ±0.05	1.48805e+06	1.14103e+06	3.85821e+06	452033	830493	2.83257e+06	4.17955e+06	3.02222e+06	5.02756e+06	2.25778e+06	2.68509e+06	2.79767e+06		PIPES (IS)	PFPP-LC/MS	[M ‒ H]‒	0.0229746	0.0188815	0.0504535	0.00659751	0.0144235	0.0428687	0.0729837	0.0486441	0.111211	0.0710079	0.0556367	0.0530397		0.692124	0.894467	student's t-test	0.557506		0.771711	0.173203	student's t-test	0.40504
	117	Lactic acid	Lac	C3H6O3	90.0317	C00186	HMDB00190	PFPP-LC/MS	[M ‒ H]‒	2.35 ±0.05	1.68457e+09	1.02241e+09	2.08306e+09	8.14885e+08	9.90296e+08	1.42908e+09	3.19525e+09	3.96386e+09	2.49108e+09	1.77697e+09	1.77235e+09	2.87427e+09		PIPES (IS)	PFPP-LC/MS	[M ‒ H]‒	26.0086	16.9187	27.24	11.8934	17.1988	21.628	55.7957	63.8001	55.1033	55.8861	36.7242	54.492		0.722847	0.855511	student's t-test	0.206368		0.842032	0.339837	student's t-test	0.24579
	118	Sebacic acid	Sebacic acid	C10H18O4	202.121	C08277	HMDB00792	PFPP-LC/MS	[M ‒ H]‒	16.03 ±0.03	3.19761e+06	2.65813e+06	3.1692e+06	2.7621e+06	2.36922e+06	1.92196e+06	3.39905e+06	3.96468e+06	2.71137e+06	2.03274e+06	2.20925e+06	2.91678e+06		PIPES (IS)	PFPP-LC/MS	[M ‒ H]‒	0.049369	0.0439862	0.0414433	0.0403133	0.0411471	0.0290873	0.0593546	0.0638134	0.0599763	0.0639301	0.0457771	0.055298		0.820096	0.530532	student's t-test	0.149343		0.900957	0.132115	student's t-test	0.327466
	119	L-Threonic acid	Threonic acid	C4H8O5	136.037	－	HMDB00943	PFPP-LC/MS	[M ‒ H]‒	1.62 ±0.02	5.17938e+07	1.99504e+07	3.53171e+07	2.32926e+07	3.10424e+07	3.94403e+07	2.63015e+07	2.4147e+07	1.1464e+07	8.54449e+06	1.47799e+07	1.88232e+07		PIPES (IS)	PFPP-LC/MS	[M ‒ H]‒	0.799663	0.330135	0.461838	0.339959	0.539125	0.596897	0.45928	0.388657	0.253587	0.268726	0.306248	0.35686		0.927336	0.473031	student's t-test	0.821471		0.845951	0.303759	student's t-test	0.436685
	120	2-Hydroxy glutaric acid	2-Hydroxy glutaric acid	C5H8O5	148.037	－	HMDB00606	PFPP-LC/MS	[M ‒ H]‒	2.61 ±0.03	4.37819e+07	1.78581e+07	3.13244e+07	2.32364e+07	2.31327e+07	3.23978e+07	2.97187e+07	2.57585e+07	1.1539e+07	8.60222e+06	1.22469e+07	1.95875e+07		PIPES (IS)	PFPP-LC/MS	[M ‒ H]‒	0.675963	0.295512	0.409626	0.339139	0.401754	0.490314	0.518952	0.414595	0.255246	0.270542	0.253763	0.371349		0.891468	0.262932	student's t-test	0.700717		0.753416	0.373118	student's t-test	0.314455
	121	DL-2-Hydroxybutyric acid	2-Hydroxybutyric acid	C4H8O3	104.047	C05984	HMDB00008	PFPP-LC/MS	[M ‒ H]‒	3.33 ±0.05	1.11824e+07	7.18407e+06	1.41765e+07	1.72237e+07	3.33829e+07	5.81445e+07	3.43492e+07	4.27276e+07	1.67837e+07	2.76532e+07	4.08518e+07	7.74258e+07		PIPES (IS)	PFPP-LC/MS	[M ‒ H]‒	0.172649	0.118881	0.185384	0.251383	0.579773	0.87997	0.599809	0.687721	0.37126	0.869699	0.846476	1.46788		3.58791	0.0248969	Welch's t-test	0.149985		1.9195	0.353986	student's t-test	0.0859244
	122	Oxidized glutathione	GSSG	C20H32N6O12S2	612.152	C00127	HMDB03337	PFPP-LC/MS	[M ‒ H]‒	5.92 ±0.04	4.30933e+07	2.54297e+07	3.9279e+07	2.35276e+07	2.35375e+07	3.98388e+07	1.85701e+07	2.17919e+07	2.03184e+07	8.13067e+06	9.44603e+06	1.89764e+07		PIPES (IS)	PFPP-LC/MS	[M ‒ H]‒	0.665333	0.420806	0.513648	0.34339	0.408784	0.602929	0.324274	0.350751	0.449448	0.255712	0.195728	0.359764		0.847052	0.910799	student's t-test	0.483025		0.721408	0.7743	student's t-test	0.163216
	123	Acetylcholine	Acetylcholine	C7H15NO2	145.11	C01996	HMDB00895	PFPP-LC/MS	[M ‒ H]‒	12.14 ±0.02	4.21891e+06	3.01141e+06	3.66801e+06	2.29962e+06	3.27857e+06	5.56154e+06	2.21461e+06	3.28547e+06	1.67259e+06	1.20334e+06	1.64932e+06	3.1156e+06		PIPES (IS)	PFPP-LC/MS	[M ‒ H]‒	0.0651372	0.0498322	0.0479662	0.0335634	0.0569401	0.0841694	0.0386718	0.0528812	0.0369981	0.0378453	0.0341749	0.0590672		1.07204	0.243102	student's t-test	0.814347		1.01973	0.593308	student's t-test	0.931577
	124	Glycerophosphocholine	Glycerophosphocholine	C8H20NO6P	257.103	C00670	HMDB00086	PFPP-LC/MS	[M + H]+	1.63 ±0.02	2.81984e+08	1.69856e+08	1.16205e+08	2.27977e+08	1.63383e+08	1.30312e+08	1.96364e+08	1.34566e+08	1.42916e+08	1.98158e+08	1.22589e+08	2.21214e+08		PIPES (IS)	PFPP-LC/MS	[M + H]+	2.95564	2.44899	1.01522	2.62996	2.11327	1.28989	1.76034	1.11115	1.90581	3.31502	1.70835	2.02384		0.93976	0.621593	student's t-test	0.862837		1.47514	0.396191	student's t-test	0.240101
	125	2-Aminobutanoic acid	2-Aminobutanoic acid	C4H9NO2	103.063	C02356	HMDB00452	PFPP-LC/MS	[M + H]+	2.09 ±0.02	3.03935e+06	2.39611e+06	2.26989e+06	4.42811e+06	3.13412e+06	5.08314e+06	2.65203e+06	2.69427e+06	2.28422e+06	4.62819e+06	3.47976e+06	6.68551e+06		PIPES (IS)	PFPP-LC/MS	[M + H]+	0.0318573	0.0345473	0.0198307	0.0510832	0.0405381	0.0503154	0.0237747	0.0222474	0.0304605	0.0774257	0.0484923	0.0611641		1.64592	0.720289	student's t-test	0.0304232		2.44608	0.166328	student's t-test	0.0135253
	126	Amino adipic acid	Amino adipic acid	C6H11NO4	161.069	C00956	HMDB00510	PFPP-LC/MS	[M + H]+	2.16 ±0.02	4.50604e+06	3.31771e+06	3.37204e+06	5.5637e+06	2.80738e+06	4.96034e+06	3.14471e+06	4.09569e+06	2.22769e+06	3.50037e+06	2.71404e+06	2.67299e+06		PIPES (IS)	PFPP-LC/MS	[M + H]+	0.0472306	0.047835	0.0294595	0.0641835	0.0363119	0.0490999	0.0281914	0.0338193	0.0297066	0.0585582	0.0378216	0.0244545		1.20133	0.717825	student's t-test	0.45286		1.31746	0.0558342	student's t-test	0.389404
	127	Adenosine	Adenosine	C10H13N5O4	267.097	C00212	HMDB00050	PFPP-LC/MS	[M + H]+	9.76 ±0.08	1.51138e+08	2.71081e+07	1.22871e+08	3.14509e+08	1.93827e+08	2.23513e+08	1.15191e+07	6.11429e+07	1.66146e+07	2.97968e+07	2.59148e+07	7.12296e+07		PIPES (IS)	PFPP-LC/MS	[M + H]+	1.58417	0.390847	1.07345	3.62821	2.50705	2.21244	0.103265	0.504874	0.221558	0.498476	0.361137	0.651662		2.73832	0.782251	student's t-test	0.0330316		1.82148	0.663029	student's t-test	0.19401
	128	Betaine	Betaine	C5H11NO2	117.079	C00719	HMDB00043	PFPP-LC/MS	[M + H]+	1.8 ±0.01	2.60986e+08	1.49306e+08	2.07698e+08	1.54491e+08	1.29028e+08	2.13774e+08	1.19249e+08	2.23367e+08	1.58143e+08	9.01723e+07	1.3637e+08	2.08338e+08		PIPES (IS)	PFPP-LC/MS	[M + H]+	2.73555	2.15271	1.81454	1.78223	1.6689	2.11604	1.06903	1.8444	2.10886	1.50851	1.9004	1.90603		0.830574	0.398642	student's t-test	0.276406		1.05827	0.301968	student's t-test	0.787604
	129	Carnitine	Carnitine	C7H15NO3	161.105	C00487	HMDB00062	PFPP-LC/MS	[M + H]+	3.1 ±0.03	2.02937e+09	1.29451e+09	2.04729e+09	1.39179e+09	1.14043e+09	1.49133e+09	9.05811e+08	1.22381e+09	9.17656e+08	5.72016e+08	5.84794e+08	7.98262e+08		PIPES (IS)	PFPP-LC/MS	[M + H]+	21.2711	18.6643	17.8859	16.0559	14.7508	14.7619	8.12033	10.1053	12.2371	9.56935	8.14943	7.30311		0.788093	0.303775	student's t-test	0.0213061		0.821392	0.472561	student's t-test	0.253271
	130	Carnosine	Carnosine	C9H14N4O3	226.107	C00386	HMDB00033	PFPP-LC/MS	[M + H]+	2.75 ±0.04	6.72919e+07	5.13261e+07	1.03008e+08	3.98836e+07	4.77199e+07	1.08137e+08	1.09982e+09	1.3512e+09	9.89278e+08	6.82229e+08	6.10603e+08	8.65415e+08		PIPES (IS)	PFPP-LC/MS	[M + H]+	0.705327	0.740023	0.899917	0.460102	0.617231	1.0704	9.85951	11.1573	13.1922	11.4131	8.50909	7.91747		0.915773	0.193766	student's t-test	0.749551		0.813812	0.892676	student's t-test	0.217432
	131	Choline	Choline	C5H13NO	103.1	C00114	HMDB00097	PFPP-LC/MS	[M + H]+	2.8 ±0.03	6.86524e+08	5.25043e+08	7.27541e+08	5.03271e+08	4.53581e+08	6.19464e+08	6.55605e+08	1.06306e+09	7.46887e+08	5.42174e+08	6.13166e+08	7.15499e+08		PIPES (IS)	PFPP-LC/MS	[M + H]+	7.19588	7.5701	6.3561	5.8058	5.86683	6.13175	5.8773	8.77801	9.95985	9.07011	8.54481	6.54593		0.842927	0.14417	student's t-test	0.04123		0.981543	0.573418	student's t-test	0.921093
	132	Creatine	Creatine	C4H9N3O2	131.069	C00300	HMDB00064	PFPP-LC/MS	[M + H]+	2.34 ±0.03	2.19304e+10	1.47808e+10	2.16735e+10	1.59053e+10	1.50169e+10	2.01421e+10	2.99203e+10	3.58248e+10	2.26738e+10	1.81774e+10	2.04798e+10	2.89944e+10		PIPES (IS)	PFPP-LC/MS	[M + H]+	229.866	213.11	189.349	183.486	194.236	199.376	268.227	295.816	302.358	304.093	285.397	265.263		0.912661	0.27381	student's t-test	0.219366		0.986556	0.930587	student's t-test	0.812573
	133	Creatinine	Creatinine	C4H7N3O	113.059	C00791	HMDB00562	PFPP-LC/MS	[M + H]+	2.97 ±0.02	1.06328e+08	5.74999e+07	9.63545e+07	5.50581e+07	6.21323e+07	9.06941e+07	1.72147e+08	1.9315e+08	1.12289e+08	8.9214e+07	1.05553e+08	1.61522e+08		PIPES (IS)	PFPP-LC/MS	[M + H]+	1.11449	0.829037	0.841792	0.635157	0.803647	0.897734	1.54325	1.59489	1.49739	1.49248	1.47094	1.47772		0.838878	0.810002	student's t-test	0.282925		0.958065	0.0969689	student's t-test	0.0882031
	134	Cytidine	Cytidine	C9H13N3O5	243.086	C00475	HMDB00089	PFPP-LC/MS	[M + H]+	4.15 ±0.04	2.42344e+07	1.95734e+07	1.56124e+07	1.46156e+07	1.23029e+07	1.53171e+07	1.03424e+07	1.24668e+07	6.99537e+06	7.3737e+06	7.25688e+06	7.97438e+06		PIPES (IS)	PFPP-LC/MS	[M + H]+	0.254015	0.282211	0.136396	0.168608	0.159131	0.151616	0.0927165	0.102942	0.0932843	0.123356	0.101129	0.0729557		0.712665	0.0239507	Welch's t-test	0.28522		1.02941	0.098438	student's t-test	0.859014
	135	Gamma-Aminobutyric acid	GABA	C4H9NO2	103.063	C00334	HMDB00112	PFPP-LC/MS	[M + H]+	2.51 ±0.04	5.61701e+06	2.36576e+06	3.75506e+06	3.9532e+06	9.45776e+06	5.20896e+06	1.856e+06	1.18102e+06	893671	1.07088e+06	3.4251e+06	2.69327e+06		PIPES (IS)	PFPP-LC/MS	[M + H]+	0.0588753	0.0341097	0.0328058	0.0456046	0.122331	0.0515608	0.0166385	0.00975199	0.0119172	0.017915	0.0477307	0.0246401		1.74493	0.211797	student's t-test	0.296864		2.35685	0.0965148	student's t-test	0.134508
	136	Glycine	Gly	C2H5NO2	75.032	C00037	HMDB00123	PFPP-LC/MS	[M + H]+	1.65 ±0.02	4.36943e+07	3.38638e+07	5.03558e+07	2.52466e+07	2.65837e+07	3.87393e+07	1.09147e+08	1.44925e+08	1.17743e+08	5.88639e+07	7.09455e+07	9.79026e+07		PIPES (IS)	PFPP-LC/MS	[M + H]+	0.457987	0.488251	0.439929	0.291248	0.343846	0.38346	0.978475	1.19669	1.57012	0.984744	0.988665	0.895687		0.7348	0.435793	student's t-test	0.0153791		0.766057	0.0599292	student's t-test	0.171197
	137	Guanosine	Guanosine	C10H13N5O5	283.092	C00387	HMDB00133	PFPP-LC/MS	[M + H]+	7.79 ±0.07	6.41697e+06	6.47625e+06	3.84936e+06	4.09935e+06	3.8089e+06	6.6961e+06	1.86638e+06	4.03854e+06	1.89342e+06	2.65153e+06	1.93239e+06	2.47258e+06		PIPES (IS)	PFPP-LC/MS	[M + H]+	0.0672602	0.093375	0.0336296	0.0472905	0.049266	0.0662813	0.0167315	0.0333473	0.025249	0.0443578	0.0269289	0.022621		0.838226	0.216702	student's t-test	0.597912		1.24665	0.685207	student's t-test	0.491899
	138	4-Hydroxy-L-proline	4-Hydroxy-Pro	C5H9NO3	131.058	C01157	HMDB06055	PFPP-LC/MS	[M + H]+	1.65 ±0.01	4.83857e+07	3.96691e+07	5.99134e+07	1.90696e+07	2.13685e+07	3.46525e+07	1.31817e+08	1.91213e+08	1.50364e+08	6.8145e+07	7.69376e+07	1.19285e+08		PIPES (IS)	PFPP-LC/MS	[M + H]+	0.50716	0.571952	0.523428	0.219989	0.27639	0.343008	1.1817	1.5789	2.00513	1.14001	1.07217	1.09131		0.523785	0.461091	student's t-test	0.00328999		0.693177	0.0143249	Welch's t-test	0.175996
	139	Hypoxanthine	Hypoxanthine	C5H4N4O	136.039	C00262	HMDB00157	PFPP-LC/MS	[M + H]+	3.51 ±0.02	1.95513e+08	1.84844e+08	1.41467e+08	1.23122e+08	9.09505e+07	1.35231e+08	1.47806e+08	1.4146e+08	7.95094e+07	7.92283e+07	8.20005e+07	9.17326e+07		PIPES (IS)	PFPP-LC/MS	[M + H]+	2.04929	2.66509	1.23591	1.42035	1.1764	1.33859	1.32503	1.16807	1.06027	1.32542	1.14272	0.839239		0.661368	0.0582556	student's t-test	0.185064		0.930772	0.454315	student's t-test	0.637919
	140	L-Alanine	Ala	C3H7NO2	89.0477	C00041	HMDB00161	PFPP-LC/MS	[M + H]+	1.81 ±0.03	4.28439e+08	1.95807e+08	3.72358e+08	2.4396e+08	1.83525e+08	2.06347e+08	3.15389e+08	5.34248e+08	3.33948e+08	2.65668e+08	2.80325e+08	3.99066e+08		PIPES (IS)	PFPP-LC/MS	[M + H]+	4.49073	2.82315	3.25307	2.81435	2.37379	2.04252	2.82737	4.41144	4.45325	4.4444	3.90648	3.65096		0.684271	0.333348	student's t-test	0.112089		1.02649	0.320648	student's t-test	0.868243
	141	L-Arginine	Arg	C6H14N4O2	174.112	C00062	HMDB00517	PFPP-LC/MS	[M + H]+	2.2 ±0.01	1.73355e+08	1.68371e+08	1.44635e+08	1.69951e+08	1.25945e+08	1.01929e+08	1.19591e+08	1.39867e+08	8.94625e+07	1.2712e+08	9.89101e+07	8.64317e+07		PIPES (IS)	PFPP-LC/MS	[M + H]+	1.81704	2.42759	1.26359	1.96058	1.62904	1.00894	1.07209	1.15492	1.193	2.12662	1.37837	0.790743		0.834854	0.8154	student's t-test	0.525758		1.25606	0.0169039	Welch's t-test	0.529393
	142	L-Asparagine	Asn	C4H8N2O3	132.053	C00152	HMDB00168	PFPP-LC/MS	[M + H]+	1.59 ±0.01	6.57418e+07	5.0212e+07	6.33357e+07	3.93197e+07	3.68688e+07	4.02961e+07	3.47324e+07	4.99739e+07	3.56605e+07	3.03361e+07	3.0408e+07	4.45232e+07		PIPES (IS)	PFPP-LC/MS	[M + H]+	0.68908	0.72396	0.553327	0.453597	0.476878	0.39887	0.311365	0.412649	0.475539	0.507497	0.423753	0.407332		0.676041	0.329619	student's t-test	0.0203249		1.1159	0.592171	student's t-test	0.461822
	143	L-Asparate	Asp	C4H7NO4	133.038	C00049	HMDB00191	PFPP-LC/MS	[M + H]+	1.61 ±0.02	2.58463e+08	1.73953e+08	3.26582e+08	1.94618e+08	7.97336e+07	1.3145e+08	3.37649e+07	1.15172e+08	8.64934e+07	7.274e+07	5.95717e+07	9.58025e+07		PIPES (IS)	PFPP-LC/MS	[M + H]+	2.70911	2.50807	2.85316	2.24514	1.03131	1.30116	0.302692	0.951008	1.1534	1.21688	0.830165	0.876473		0.567215	0.137724	student's t-test	0.0379157		1.21454	0.36841	student's t-test	0.577243
	144	L-Citrulline	Citrulline	C6H13N3O3	175.096	C00327	HMDB00904	PFPP-LC/MS	[M + H]+	1.79 ±0.02	1.11946e+08	8.60859e+07	8.87806e+07	1.01134e+08	8.52289e+07	1.13148e+08	7.71416e+07	1.06593e+08	6.56238e+07	7.21625e+07	7.89725e+07	9.84876e+07		PIPES (IS)	PFPP-LC/MS	[M + H]+	1.17338	1.24119	0.775623	1.16669	1.10239	1.11999	0.691551	0.880172	0.875103	1.20722	1.10053	0.901039		1.06234	0.0343089	Welch's t-test	0.693879		1.31141	0.646955	student's t-test	0.0804123
	145	L-Cysteine	Cys	C3H7NO2S	121.02	C00097	HMDB00574	PFPP-LC/MS	[M + H]+	1.74 ±0.02	224518	295842	146479	238794	403966	265013	1.34453e+06	1.20687e+06	637750	964701	861737	894316		PIPES (IS)	PFPP-LC/MS	[M + H]+	0.00235331	0.00426547	0.0012797	0.00275475	0.00522509	0.00262323	0.0120533	0.00996545	0.0085045	0.0161386	0.0120088	0.00818188		1.34242	0.968649	student's t-test	0.499604		1.19022	0.334583	student's t-test	0.484946
	146	L-Glutamic acid	Glu	C5H9NO4	147.053	C00025	HMDB00148	PFPP-LC/MS	[M + H]+	1.79 ±0.03	2.1832e+09	1.7775e+09	2.04316e+09	1.68168e+09	1.76584e+09	2.33198e+09	3.34935e+08	5.78587e+08	4.05122e+08	3.89752e+08	4.70222e+08	6.07857e+08		PIPES (IS)	PFPP-LC/MS	[M + H]+	22.8835	25.628	17.8499	19.4	22.8401	23.0831	3.00259	4.77756	5.40236	6.52023	6.5528	5.56114		0.984355	0.428495	student's t-test	0.89936		1.41355	0.339933	student's t-test	0.082637
	147	L-Glutamine	Gln	C5H10N2O3	146.069	C00064	HMDB00641	PFPP-LC/MS	[M + H]+	1.68 ±0.01	2.36593e+09	1.70825e+09	2.31617e+09	1.32274e+09	1.39284e+09	1.69032e+09	1.52514e+09	1.77798e+09	1.25862e+09	8.64692e+08	9.98501e+08	1.19275e+09		PIPES (IS)	PFPP-LC/MS	[M + H]+	24.7987	24.6296	20.235	15.2592	18.0156	16.7316	13.6725	14.6813	16.784	14.4656	13.9147	10.9122		0.717829	0.44255	student's t-test	0.0179841		0.870501	0.815878	student's t-test	0.246072
	148	L-Histidine	His	C6H9N3O2	155.069	C00135	HMDB00177	PFPP-LC/MS	[M + H]+	2.07 ±0.01	1.69387e+08	1.4067e+08	1.33528e+08	1.0888e+08	1.00795e+08	9.3333e+07	1.33439e+08	1.45242e+08	9.95796e+07	1.11575e+08	1.16896e+08	1.03027e+08		PIPES (IS)	PFPP-LC/MS	[M + H]+	1.77545	2.02818	1.16655	1.25605	1.30372	0.923855	1.19624	1.19931	1.32791	1.86655	1.62901	0.942571		0.700905	0.358344	student's t-test	0.154004		1.19194	0.0478872	Welch's t-test	0.481401
	149	L-Homoserine	HomoSer	C4H9NO3	119.058	C00263	HMDB00719	PFPP-LC/MS	[M + H]+	1.72 ±0.01	1.35503e+08	9.49434e+07	1.27611e+08	9.16914e+07	8.82523e+07	1.05848e+08	1.14683e+08	1.52705e+08	9.95597e+07	7.99604e+07	8.67946e+07	1.08885e+08		PIPES (IS)	PFPP-LC/MS	[M + H]+	1.42029	1.3689	1.11486	1.05776	1.1415	1.04774	1.0281	1.26093	1.32764	1.33767	1.20953	0.996165		0.831699	0.180329	student's t-test	0.0913563		0.979732	0.907705	student's t-test	0.864949
	150	L-Isoleucine	Ile	C6H13NO2	131.095	C00407	HMDB00172	PFPP-LC/MS	[M + H]+	6.25 ±0.07	2.95746e+08	1.81609e+08	2.5233e+08	2.32321e+08	2.25844e+08	3.83065e+08	3.02707e+08	4.26108e+08	2.08146e+08	2.18999e+08	2.7197e+08	4.5395e+08		PIPES (IS)	PFPP-LC/MS	[M + H]+	3.09989	2.61845	2.20446	2.68008	2.92118	3.79177	2.71368	3.5185	2.77566	3.66367	3.79006	4.15308		1.18557	0.739958	student's t-test	0.313443		1.28852	0.48694	student's t-test	0.043493
	151	L-Leucine	Leu	C6H13NO2	131.095	C00123	HMDB00687	PFPP-LC/MS	[M + H]+	7.05 ±0.08	5.46487e+08	3.27511e+08	4.40024e+08	4.2957e+08	3.93367e+08	7.10008e+08	5.29456e+08	7.54838e+08	3.6217e+08	4.00196e+08	4.76189e+08	7.79662e+08		PIPES (IS)	PFPP-LC/MS	[M + H]+	5.72806	4.72208	3.84423	4.95557	5.08799	7.028	4.74641	6.23291	4.8296	6.69495	6.63596	7.13294		1.19429	0.795288	student's t-test	0.343843		1.29445	0.191137	student's t-test	0.0376586
	152	L-Lysine	Lys	C6H14N2O2	146.106	C00047	HMDB00182	PFPP-LC/MS	[M + H]+	2.05 ±0.01	1.35916e+08	1.54378e+08	1.32473e+08	1.32382e+08	9.06191e+07	7.66698e+07	8.06216e+07	9.7127e+07	8.53275e+07	9.18623e+07	7.34657e+07	6.04196e+07		PIPES (IS)	PFPP-LC/MS	[M + H]+	1.42462	2.22583	1.15734	1.52718	1.17211	0.758915	0.722748	0.802006	1.13786	1.53678	1.02378	0.552765		0.719292	0.646976	student's t-test	0.313271		1.16928	0.334031	student's t-test	0.654622
	153	L-Methionine	Met	C5H11NO2S	149.051	C00073	HMDB00696	PFPP-LC/MS	[M + H]+	3.36 ±0.02	8.29846e+07	5.66093e+07	8.04274e+07	4.63637e+07	4.36185e+07	6.24986e+07	1.02473e+08	1.44735e+08	7.69094e+07	5.3958e+07	6.12837e+07	8.85829e+07		PIPES (IS)	PFPP-LC/MS	[M + H]+	0.869812	0.816196	0.702646	0.534857	0.564182	0.618642	0.918643	1.19512	1.0256	0.902672	0.854022	0.810423		0.7191	0.397581	student's t-test	0.0153175		0.817719	0.197495	student's t-test	0.0876664
	154	L-Ornithine	Orn	C5H12N2O2	132.09	C00077	HMDB00214	PFPP-LC/MS	[M + H]+	2.03 ±0.01	2.95943e+06	3.24402e+06	2.40464e+06	2.76245e+06	2.43475e+06	2.21664e+06	1.61985e+06	1.93278e+06	1.62465e+06	2.15759e+06	1.8515e+06	2.84599e+06		PIPES (IS)	PFPP-LC/MS	[M + H]+	0.0310196	0.0467725	0.0210079	0.031868	0.0314922	0.0219414	0.0145215	0.0159595	0.0216649	0.0360947	0.0258016	0.0260373		0.863375	0.315942	student's t-test	0.611215		1.6863	0.585023	student's t-test	0.0416475
	155	L-Phenylalanine	Phe	C9H11NO2	165.079	C00079	HMDB00159	PFPP-LC/MS	[M + H]+	11.93 ±0.02	3.22321e+08	2.17861e+08	2.68792e+08	1.99881e+08	1.96859e+08	2.87556e+08	3.52343e+08	4.55271e+08	2.40889e+08	2.21975e+08	2.58478e+08	3.58676e+08		PIPES (IS)	PFPP-LC/MS	[M + H]+	3.37844	3.14113	2.34828	2.30586	2.54626	2.84637	3.15865	3.7593	3.21229	3.71346	3.60203	3.28144		0.868135	0.402545	student's t-test	0.326003		1.04607	0.625751	student's t-test	0.538436
	156	L-Proline	Pro	C5H9NO2	115.063	C00148	HMDB00162	PFPP-LC/MS	[M + H]+	2.06 ±0.02	2.9442e+07	2.52755e+07	2.86432e+07	3.12736e+07	2.98603e+07	2.52192e+07	5.01428e+07	4.90846e+07	3.10492e+07	4.82746e+07	4.36805e+07	3.91795e+07		PIPES (IS)	PFPP-LC/MS	[M + H]+	0.3086	0.364424	0.250238	0.360777	0.386227	0.249632	0.449516	0.405305	0.414046	0.807594	0.608712	0.358444		1.07947	0.763796	student's t-test	0.670401		1.39869	0.0214119	Welch's t-test	0.323537
	157	L-Serine	Ser	C3H7NO3	105.043	C00065	HMDB00187	PFPP-LC/MS	[M + H]+	1.6 ±0.02	1.0244e+08	8.65235e+07	9.83473e+07	5.91445e+07	5.63683e+07	6.61149e+07	7.61989e+07	9.8734e+07	7.62996e+07	5.25561e+07	5.41223e+07	6.812e+07		PIPES (IS)	PFPP-LC/MS	[M + H]+	1.07373	1.2475	0.859202	0.682298	0.729094	0.654438	0.683101	0.815275	1.01747	0.879219	0.754224	0.623214		0.649543	0.0725121	student's t-test	0.0314365		0.896978	0.732469	student's t-test	0.518349
	158	L-Tryptophan	Trp	C11H12N2O2	204.09	C00078	HMDB00929	PFPP-LC/MS	[M + H]+	14.27 ±0.02	7.13682e+07	4.59209e+07	5.09217e+07	4.1121e+07	3.84359e+07	6.45029e+07	7.60552e+07	7.90584e+07	4.48741e+07	4.62914e+07	5.14499e+07	7.3687e+07		PIPES (IS)	PFPP-LC/MS	[M + H]+	0.748053	0.66209	0.444873	0.474376	0.497148	0.638481	0.681812	0.652808	0.598404	0.774417	0.716983	0.674144		0.86792	0.48912	student's t-test	0.475369		1.12029	0.829249	student's t-test	0.110761
	159	L-Tyrosine	Tyr	C9H11NO3	181.074	C00082	HMDB00158	PFPP-LC/MS	[M + H]+	6.97 ±0.06	1.33232e+08	8.9653e+07	9.22443e+07	7.4182e+07	6.01055e+07	1.04293e+08	1.4893e+08	1.85352e+08	9.21268e+07	8.62238e+07	8.62856e+07	1.29712e+08		PIPES (IS)	PFPP-LC/MS	[M + H]+	1.39649	1.29262	0.805884	0.855773	0.777432	1.03234	1.33512	1.5305	1.22853	1.44245	1.20244	1.1867		0.762674	0.292757	student's t-test	0.233209		0.935871	0.933842	student's t-test	0.50988
	160	L-Valine	Val	C5H11NO2	117.079	C00183	HMDB00883	PFPP-LC/MS	[M + H]+	2.96 ±0.02	3.0645e+08	1.73841e+08	2.67493e+08	2.80658e+08	2.50949e+08	3.80627e+08	3.09147e+08	3.75644e+08	2.17757e+08	2.66443e+08	2.91083e+08	4.23034e+08		PIPES (IS)	PFPP-LC/MS	[M + H]+	3.21209	2.50645	2.33692	3.2377	3.24589	3.76764	2.77141	3.1018	2.90383	4.45737	4.0564	3.87024		1.27258	0.599359	student's t-test	0.0842539		1.41095	0.469891	student's t-test	0.00371909
	161	Dimethylglycine	DMG	C4H9NO2	103.063	C01026	HMDB00092	PFPP-LC/MS	[M + H]+	1.75 ±0.01	1.09022e+07	6.68955e+06	8.66767e+06	6.60378e+06	6.1056e+06	8.38801e+06	1.07298e+07	1.5175e+07	9.09784e+06	6.10851e+06	7.82869e+06	1.05411e+07		PIPES (IS)	PFPP-LC/MS	[M + H]+	0.114273	0.0964504	0.0757243	0.076182	0.0789727	0.0830287	0.0961894	0.125304	0.121321	0.10219	0.109097	0.0964378		0.831508	0.0617231	student's t-test	0.228118		0.897643	0.27768	student's t-test	0.299514
	162	Reduced glutathione	GSH	C10H17N3O6S	307.084	C00051	HMDB00125	PFPP-LC/MS	[M + H]+	3.04 ±0.02	5.67116e+08	3.36922e+08	4.41248e+08	3.6956e+08	2.85038e+08	4.56166e+08	4.1539e+08	5.76779e+08	2.93062e+08	2.76403e+08	2.82445e+08	4.17298e+08		PIPES (IS)	PFPP-LC/MS	[M + H]+	5.94429	4.85776	3.85492	4.26329	3.68681	4.51535	3.72385	4.76263	3.90803	4.62398	3.93602	3.81776		0.850479	0.28356	student's t-test	0.324767		0.998649	0.763124	student's t-test	0.98971
	163	5-Hydroxy-L-lysine	5-Hydroxy-Lys	C6H14N2O3	162.1	C16741	HMDB00450	PFPP-LC/MS	[M + H]+	2.04 ±0.01	422509	628809	436859	541719	458858	346515	144082	100204	141506	256341	186736	148958		PIPES (IS)	PFPP-LC/MS	[M + H]+	0.00442858	0.00906621	0.00381657	0.00624933	0.00593508	0.00342997	0.00129166	0.000827417	0.00188701	0.00428838	0.00260227	0.00136278		0.901973	0.449254	student's t-test	0.778738		2.06023	0.231383	student's t-test	0.191424
	164	Histamine	Histamine	C5H9N3	111.08	C00388	HMDB00870	PFPP-LC/MS	[M + H]+	2.92 ±0.03	1.07688e+08	6.51816e+07	9.09574e+07	6.75018e+07	8.55864e+07	1.32805e+08	6.52584e+07	7.61409e+07	5.27995e+07	7.42213e+07	5.69201e+07	6.47658e+07		PIPES (IS)	PFPP-LC/MS	[M + H]+	1.12874	0.939793	0.794641	0.778709	1.10701	1.31457	0.585022	0.628717	0.70409	1.24166	0.793213	0.592526		1.11774	0.555387	student's t-test	0.573479		1.36999	0.0635984	student's t-test	0.291906
	165	Xanthine	Xanthine	C5H4N4O2	152.033	C00385	HMDB00292	PFPP-LC/MS	[M + H]+	3.52 ±0.03	2.84181e+07	2.20737e+07	2.2951e+07	1.83111e+07	1.19835e+07	2.31627e+07	2.28171e+07	2.08826e+07	1.2095e+07	1.2451e+07	1.10478e+07	1.35119e+07		PIPES (IS)	PFPP-LC/MS	[M + H]+	0.297868	0.31826	0.200509	0.211239	0.155	0.229276	0.204548	0.172434	0.161288	0.208294	0.153958	0.123617		0.729227	0.549678	student's t-test	0.159128		0.902648	0.430266	student's t-test	0.566001
	166	Trigonelline	Trigonelline	C7H7NO2	137.048	C01004	HMDB00875	PFPP-LC/MS	[M + H]+	2.18 ±0.04	1.23847e+07	7.79029e+06	1.72639e+07	9.14583e+06	4.45647e+06	2.25504e+07	5.81771e+06	5.18837e+06	6.03601e+06	4.95039e+06	4.04422e+06	7.97351e+06		PIPES (IS)	PFPP-LC/MS	[M + H]+	0.129811	0.112321	0.150824	0.105507	0.057642	0.223215	0.052154	0.0428418	0.0804911	0.0828159	0.0563584	0.0729477		0.983224	0.0973997	student's t-test	0.967338		1.20876	0.634711	student's t-test	0.423191
	167	Phosphocholine	Phosphocholine	C5H14NO4P	183.066	C00588	HMDB01565	PFPP-LC/MS	[M + H]+	1.55 ±0.01	7.81528e+07	4.90865e+07	6.62262e+07	4.72108e+07	4.01772e+07	6.40644e+07	5.6298e+07	4.96675e+07	3.93015e+07	3.6514e+07	3.27244e+07	3.38286e+07		PIPES (IS)	PFPP-LC/MS	[M + H]+	0.819167	0.707733	0.578579	0.544629	0.51967	0.63414	0.504695	0.410119	0.524092	0.610848	0.456033	0.30949		0.806676	0.399905	student's t-test	0.155776		0.95654	0.281398	student's t-test	0.835123
	168	Hypotaurine	Hypotaurine	C2H7NO2S	109.02	C00519	HMDB00965	PFPP-LC/MS	[M + H]+	1.53 ±0.01	9.371e+07	6.36549e+07	7.96605e+07	5.82325e+07	6.46901e+07	7.44099e+07	4.77066e+07	6.12033e+07	3.86495e+07	2.7884e+07	3.97652e+07	4.66233e+07		PIPES (IS)	PFPP-LC/MS	[M + H]+	0.982231	0.91778	0.695947	0.671776	0.836732	0.736545	0.427676	0.505373	0.515398	0.466477	0.55415	0.426545		0.864826	0.468901	student's t-test	0.303263		0.99912	0.70222	student's t-test	0.993189
	169	Inosine	Inosine	C10H12N4O5	268.081	C00294	HMDB00195	PFPP-LC/MS	[M + H]+	6.53 ±0.04	1.30878e+08	1.14862e+08	9.68062e+07	7.59285e+07	5.03852e+07	1.01284e+08	6.58552e+07	8.54375e+07	4.44764e+07	4.7798e+07	4.34121e+07	6.01307e+07		PIPES (IS)	PFPP-LC/MS	[M + H]+	1.37181	1.65609	0.845739	0.87592	0.651705	1.00256	0.590372	0.705482	0.593101	0.79962	0.604972	0.550121		0.653179	0.314722	student's t-test	0.158353		1.03481	0.401249	student's t-test	0.808498
	170	DL-methionine sulfoxide	MSO	C5H11NO3S	165.046	－	HMDB02005	PFPP-LC/MS	[M + H]+	1.75 ±0.01	2.37977e+06	2.28701e+06	2.02082e+06	1.19672e+06	1.29173e+06	1.11471e+06	3.7478e+06	2.88201e+06	2.01755e+06	2.03832e+06	1.8287e+06	2.41871e+06		PIPES (IS)	PFPP-LC/MS	[M + H]+	0.0249438	0.0329742	0.0176547	0.0138055	0.0167078	0.011034	0.0335979	0.0237976	0.0269043	0.0340995	0.0254839	0.0221282		0.549766	0.241118	student's t-test	0.0740228		0.969298	0.793577	student's t-test	0.860071
	171	Pyridoxamine 5'-phosphate	Pyridoxamine 5-phosphate	C8H13N2O5P	248.056	C00647	HMDB01555	PFPP-LC/MS	[M + H]+	2.05 ±0.01	2.65755e+06	2.49595e+06	2.51814e+06	2.89995e+06	2.29716e+06	1.96273e+06	900683	1.06541e+06	1.11601e+06	1.28442e+06	1.1249e+06	1.05805e+06		PIPES (IS)	PFPP-LC/MS	[M + H]+	0.0278554	0.0359868	0.0219995	0.0334541	0.0297125	0.0194281	0.00807436	0.0087974	0.0148821	0.0214872	0.0156761	0.00967981		0.962174	0.966629	student's t-test	0.861838		1.4752	0.572583	student's t-test	0.280561
	172	N6,N6,N6-Trimethyl-L-lysine	Trimethyl-Lys	C9H20N2O2	188.152	C03793	HMDB01325	PFPP-LC/MS	[M + H]+	2.57 ±0.02	1.93396e+07	1.31076e+07	2.17681e+07	1.36568e+07	1.33372e+07	1.8494e+07	2.07993e+07	3.03451e+07	2.13401e+07	1.43661e+07	1.44899e+07	2.10459e+07		PIPES (IS)	PFPP-LC/MS	[M + H]+	0.20271	0.188987	0.190175	0.157546	0.17251	0.183063	0.186459	0.250568	0.284573	0.240333	0.201925	0.192544		0.881841	0.520346	student's t-test	0.0562195		0.879714	0.410575	student's t-test	0.420572
	173	L-Argininosuccinate	Argininosuccinate	C10H18N4O6	290.123	C03406	HMDB00052	PFPP-LC/MS	[M + H]+	2.1 ±0.03	1.46395e+06	1.83057e+06	1.13105e+06	1.70365e+06	541772	346374	321858	171537	111632	506765	161452	38981.3		PIPES (IS)	PFPP-LC/MS	[M + H]+	0.0153445	0.0263933	0.00988134	0.0196535	0.00700752	0.00342858	0.00288536	0.00141643	0.00148863	0.00847775	0.00224993	0.00035663		0.582916	0.986738	student's t-test	0.35793		1.91425	0.0731759	student's t-test	0.519109
	174	Urocanic acid	Urocanic acid	C6H6N2O2	138.043	C00785	HMDB00301	PFPP-LC/MS	[M + H]+	6.14 ±0.09	2.25948e+07	1.68554e+07	1.80784e+07	1.29828e+07	8.82501e+06	1.9816e+07	1.17403e+07	2.20271e+07	1.19147e+07	1.3587e+07	9.71752e+06	2.87119e+07		PIPES (IS)	PFPP-LC/MS	[M + H]+	0.23683	0.243022	0.157941	0.149772	0.114147	0.196148	0.105249	0.181884	0.158884	0.227299	0.135419	0.262678		0.721343	0.858048	student's t-test	0.177484		1.40218	0.5277	student's t-test	0.247547
	175	1-Methylhistidine	1-Methyl-His	C7H11N3O2	169.085	C01152	HMDB00001	PFPP-LC/MS	[M + H]+	3.11 ±0.03	8.7836e+07	6.44662e+07	1.1038e+08	5.06283e+07	7.06603e+07	1.10681e+08	8.05817e+08	9.17749e+08	7.62512e+08	6.03316e+08	5.58402e+08	7.29891e+08		PIPES (IS)	PFPP-LC/MS	[M + H]+	0.920663	0.929477	0.964324	0.584054	0.913953	1.09557	7.22391	7.57812	10.1682	10.093	7.78165	6.67759		0.921517	0.0157296	Welch's t-test	0.672033		0.983259	0.919268	student's t-test	0.92382
	176	Xanthosine	Xanthosine	C10H12N4O6	284.076	C01762	HMDB00299	PFPP-LC/MS	[M + H]+	10.21 ±0.08	0	0	0	0	0	0	0	0	0	0	0	0		PIPES (IS)	PFPP-LC/MS	[M + H]+	0	0	0	0	0	0	0	0	0	0	0	0		#DIV/0!	#DIV/0!	#DIV/0!	#DIV/0!		#DIV/0!	#DIV/0!	#DIV/0!	#DIV/0!
	177	O-Acetylcarnitine	Acetylcarnitine	C9H17NO4	203.116	C02571	HMDB00201	PFPP-LC/MS	[M + H]+	12.13 ±0.02	1.28209e+09	1.02235e+09	1.15577e+09	8.34158e+08	1.08412e+09	1.51118e+09	8.08108e+08	1.02855e+09	6.51654e+08	4.90807e+08	6.62412e+08	9.63688e+08		PIPES (IS)	PFPP-LC/MS	[M + H]+	13.4384	14.7403	10.0973	9.62294	14.0225	14.9584	7.24445	8.49302	8.68991	8.2108	9.23107	8.81654		1.00857	0.828139	student's t-test	0.961868		1.07496	0.59988	student's t-test	0.322272
	178	L-Homocitrulline	Homocitrulline	C7H15N3O3	189.111	C02427	HMDB00679	PFPP-LC/MS	[M + H]+	2.15 ±0.03	889857	678329	593120	971646	876095	935908	1.17807e+06	896220	738242	1.76339e+06	1.23862e+06	1.29624e+06		PIPES (IS)	PFPP-LC/MS	[M + H]+	0.00932713	0.00978019	0.00518174	0.011209	0.0113318	0.00926408	0.010561	0.00740034	0.00984458	0.0295001	0.0172608	0.011859		1.30943	0.346435	student's t-test	0.194485		2.10818	0.0650432	student's t-test	0.124953
	179	L-Saccharopine	Saccharopine	C11H20N2O6	276.132	C00449	HMDB00279	PFPP-LC/MS	[M + H]+	1.79 ±0.02	0	0	0	0	0	0	0	0	0	0	0	0		PIPES (IS)	PFPP-LC/MS	[M + H]+	0	0	0	0	0	0	0	0	0	0	0	0		#DIV/0!	#DIV/0!	#DIV/0!	#DIV/0!		#DIV/0!	#DIV/0!	#DIV/0!	#DIV/0!
	180	L-Anserine (beta-alanyl-N-methylhistidine) (nitrate salt)	L-Anserine	C10H16N4O3	240.122	－	HMDB00194	PFPP-LC/MS	[M + H]+	3.11 ±0.04	1.56658e+08	1.00131e+08	1.82387e+08	7.77964e+07	1.10153e+08	1.80885e+08	1.2962e+09	1.49496e+09	1.22029e+09	9.65036e+08	8.89735e+08	1.22687e+09		PIPES (IS)	PFPP-LC/MS	[M + H]+	1.64203	1.4437	1.5934	0.897468	1.42477	1.79049	11.6201	12.3443	16.2728	16.1442	12.3989	11.2244		0.878951	0.100692	student's t-test	0.516993		0.98833	0.974012	student's t-test	0.94339
	181	N2-Acetyl- L-lysine	N-Acetyl-Lys	C8H16N2O3	188.116	C12989	HMDB00446	PFPP-LC/MS	[M + H]+	3.2 ±0.13	1.8451e+06	1.2211e+06	2.31689e+06	1.55449e+06	690081	2.05758e+06	1.03942e+06	1.63574e+06	721015	654205	642789	1.03511e+06		PIPES (IS)	PFPP-LC/MS	[M + H]+	0.0193396	0.0176058	0.0202413	0.0179328	0.00892582	0.0203669	0.00931807	0.0135068	0.00961485	0.0109443	0.00895762	0.00947		0.825813	0.0941298	student's t-test	0.404329		0.905432	0.325966	student's t-test	0.526296
	182	Pipecolic acid	Pipecolic acid	C6H11NO2	129.079	C00408	HMDB00070	PFPP-LC/MS	[M + H]+	3.02 ±0.03	1.845e+07	1.07871e+07	1.4569e+07	1.42443e+07	1.0568e+07	1.48107e+07	1.99155e+07	2.09408e+07	1.29587e+07	1.33127e+07	1.2227e+07	1.72375e+07		PIPES (IS)	PFPP-LC/MS	[M + H]+	0.193386	0.155528	0.127281	0.164324	0.136692	0.146603	0.178536	0.172914	0.172806	0.22271	0.17039	0.157702		0.93999	0.302377	student's t-test	0.670547		1.05063	0.0179335	Welch's t-test	0.70054
	183	Glycylglycine	Gly-Gly	C4H8N2O3	132.053	C02037	HMDB11733	PFPP-LC/MS	[M + H]+	2.17 ±0.11	1.48551e+06	605193	894014	626541	600982	503268	790024	508991	584573	756691	587531	634334		PIPES (IS)	PFPP-LC/MS	[M + H]+	0.0155705	0.00872571	0.00781047	0.00722785	0.00777337	0.0049816	0.00708233	0.00420288	0.00779538	0.0126588	0.00818757	0.00580337		0.622388	0.217066	student's t-test	0.194136		1.39669	0.459969	student's t-test	0.332366
	184	Niacinamide	Niacinamide	C6H6N2O	122.048	C00153	HMDB01406	PFPP-LC/MS	[M + H]+	3.82 ±0.03	9.43877e+08	6.60434e+08	8.72777e+08	5.21417e+08	5.58455e+08	7.10139e+08	1.10258e+09	1.30199e+09	7.29141e+08	6.16999e+08	6.75579e+08	8.03432e+08		PIPES (IS)	PFPP-LC/MS	[M + H]+	9.89334	9.52217	7.62493	6.01513	7.22332	7.0293	9.88433	10.7509	9.72322	10.3219	9.41457	7.35041		0.749535	0.442796	student's t-test	0.0470738		0.892236	0.232799	student's t-test	0.308418
	185	O-Phosphoethanolamine	O-Phosphoethanolamine	C2H8NO4P	141.019	C00346	HMDB00224	PFPP-LC/MS	[M + H]+	1.46 ±0.01	4.01486e+07	3.13365e+07	3.5506e+07	2.51581e+07	2.73059e+07	3.69783e+07	1.67043e+07	1.90446e+07	1.24897e+07	1.33458e+07	1.32057e+07	1.53405e+07		PIPES (IS)	PFPP-LC/MS	[M + H]+	0.420822	0.451811	0.310195	0.290226	0.353187	0.366029	0.149749	0.157256	0.166552	0.223263	0.184028	0.140347		0.853414	0.457931	student's t-test	0.303128		1.15643	0.0791053	student's t-test	0.369391
		Piperazine-1,4-bis(2-ethanesulfonic acid) (IS)	PIPES (IS)	C8H18N2O6S2	302.061	－	－	IC/MS	[M ‒ H]‒	7.57 ±0.01	1.78146e+07	9.95561e+06	1.8254e+07	1.50782e+07	1.19459e+07	1.64486e+07	2.03773e+07	2.14928e+07	1.27991e+07	8.88825e+06	1.16571e+07	1.89078e+07
		Piperazine-1,4-bis(2-ethanesulfonic acid) (IS)	PIPES (IS)	C8H18N2O6S2	302.061	－	－	PFPP-LC/MS	[M + H]+	1.4 ±0.01	9.54052e+06	6.93575e+06	1.14464e+07	8.66843e+06	7.73129e+06	1.01026e+07	1.11549e+07	1.21105e+07	7.49897e+06	5.97759e+06	7.17589e+06	1.09304e+07
		Piperazine-1,4-bis(2-ethanesulfonic acid) (IS)	PIPES (IS)	C8H18N2O6S2	302.061	－	－	PFPP-LC/MS	[M ‒ H]‒	1.41 ±0.01	6.47696e+06	6.04309e+06	7.64707e+06	6.85157e+06	5.75793e+06	6.60755e+06	5.72668e+06	6.21293e+06	4.52074e+06	3.17962e+06	4.8261e+06	5.27467e+06

## Sheet: Supplementary Table S7
	Supplementary Table S7. Quantitaive metabolic profile data of 258 lipids during the 2-week pair-feeding
		Lipid	Molecular formula	Exact mass	Method	Precursor ion	Product ion(s)	MRM transition(s)			RT (min)	Peak area														Relative peak area (Analyte/IS/sample amount, mg)													SOL (CANA/Vehicle)					EDL (CANA/Vehicle)
								1	2	3		Vehicle-treated mice SOL			CANA-treated mice SOL			Vehicle-treated mice EDL			CANA-treated mice EDL				IS	Vehicle-treated mice SOL			CANA-treated mice SOL			Vehicle-treated mice EDL			CANA-treated mice EDL				Fold change	F-test	Welch's or student's t-test	P-value		Fold change	F-test	Welch's or student's t-test	P-value
												1	2	3	1	2	3	1	2	3	1	2	3			1	2	3	1	2	3	1	2	3	1	2	3
												Sample amount (mg)
												10	10	10	10	10	10	10	10	10	10	10	10
	1	Cer(d18:1)(16:0)	C34H67O3N1	537.512	DEA-SFC/MS/MS	[M + H]+	[C18H34N]+	538.5 > 264.25			5.56±0.08	661407	702944	542173	475857	596372	750963	503121	503594	513812	601339	532525	502390		Cer(d18:1/17:0) (IS)	0.00781927	0.00883894	0.00602284	0.00531398	0.00599051	0.00715486	0.00456606	0.00558369	0.00534956	0.00606447	0.00516187	0.00452421		0.813866	0.597972	student's t-test	0.225593		1.01621	0.643366	student's t-test	0.884796
	2	Cer(d18:1)(18:0)	C36H71O3N1	565.543	DEA-SFC/MS/MS	[M + H]+	[C18H34N]+	566.55 > 264.25			5.57±0.08	1607016	1466095	1866611	1183923	1909533	1942609	11770403	8894962	11223165	12907679	12393354	10881321		Cer(d18:1/17:0) (IS)	0.0189984	0.0184349	0.0207356	0.0132211	0.0191811	0.0185084	0.106822	0.0986244	0.11685	0.130173	0.120131	0.0979903		0.875218	0.237839	student's t-test	0.29459		1.08067	0.47015	student's t-test	0.469945
	3	Cer(d18:1)(18:1)	C36H69O3N1	563.528	DEA-SFC/MS/MS	[M + H]+	[C18H34N]+	564.55 > 264.25			5.59±0.09	31266	30693	33741	21930	47426	44124	168858	138798	153496	168741	160094	152855		Cer(d18:1/17:0) (IS)	0.000369632	0.000385939	0.000374819	0.000244896	0.00047639	0.000420395	0.00153246	0.00153895	0.00159813	0.00170174	0.00155182	0.00137652		1.00999	0.00947184	Welch's t-test	0.961912		0.99155	0.0941725	student's t-test	0.89794
	4	Cer(d18:1)(18:2)	C36H67O3N1	561.512	DEA-SFC/MS/MS	[M + H]+	[C18H34N]+	562.5 > 264.25			5.58±0.08	206339	166306	244609	178634	237402	233294	1066130	761364	1167817	1247107	1061789	1035586		Cer(d18:1/17:0) (IS)	0.00243938	0.00209116	0.00271729	0.00199484	0.00238468	0.00222273	0.00967563	0.00844176	0.0121588	0.012577	0.0102921	0.00932584		0.910928	0.560868	student's t-test	0.37056		1.06338	0.874965	student's t-test	0.683405
	5	Cer(d18:1)(20:0)	C38H75O3N1	593.575	DEA-SFC/MS/MS	[M + H]+	[C18H34N]+	594.6 > 264.25			5.58±0.08	119576	131252	139209	125961	95071	150931	203674	181498	228908	248733	218695	182992		Cer(d18:1/17:0) (IS)	0.00141365	0.00165039	0.00154643	0.00140663	0.00095498	0.00143801	0.00184844	0.00201239	0.00238328	0.00250846	0.00211985	0.00164791		0.824128	0.323212	student's t-test	0.187925		1.00514	0.575796	student's t-test	0.972776
	6	Cer(d18:1)(20:4)	C38H73O3N1	591.559	DEA-SFC/MS/MS	[M + H]+	[C18H34N]+	586.5 > 264.25			5.59±0.09	53108	51217	41841	36363	38104	45736	37000	28921	37032	42748	44383	38352		Cer(d18:1/17:0) (IS)	0.000627852	0.000644012	0.000464799	0.000406072	0.000382752	0.000435753	0.000335792	0.000320667	0.000385559	0.000431111	0.000430213	0.000345374		0.705132	0.13399	student's t-test	0.0449793		1.15804	0.644427	student's t-test	0.187134
	7	Cer(d18:1)(22:0)	C38H67O3N1	585.512	DEA-SFC/MS/MS	[M + H]+	[C18H34N]+	622.6 > 264.25			5.59±0.08	510851	500941	464169	405807	419031	495320	448709	340172	376472	469354	446044	400802		Cer(d18:1/17:0) (IS)	0.00603937	0.00629892	0.00515632	0.00453172	0.00420913	0.0047192	0.00407224	0.00377172	0.00391965	0.00473341	0.00432359	0.00360937		0.769383	0.312983	student's t-test	0.023342		1.07674	0.130462	student's t-test	0.425731
	8	Cer(d18:1)(24:0)	C42H83O3N1	649.637	DEA-SFC/MS/MS	[M + H]+	[C18H34N]+	650.65 > 264.25			5.6±0.09	830651	934893	844383	693457	725607	860602	620965	556656	621740	694666	648150	579276		Cer(d18:1/17:0) (IS)	0.0098201	0.0117555	0.00938	0.00774396	0.00728866	0.00819945	0.00563555	0.00617202	0.00647326	0.00700567	0.00628265	0.0052166		0.750496	0.229855	student's t-test	0.0293905		1.01226	0.363722	student's t-test	0.902824
	9	DG(16:0)(16:0)	C35H68O5	568.507	DEA-SFC/MS/MS	[M + NH4]+	[M + H ‒ Acyl FA]+	586.55 > 313.25			4.26±0.16	2304932	2959289	2061195	1848721	1663798	2209650	5589639	4311584	5143300	3004239	3287299	1984427		15:0-18:1 (d7) DG (IS)	0.0747161	0.0893469	0.045183	0.0409565	0.0435991	0.0471578	0.125698	0.0924689	0.115306	0.0610062	0.0691025	0.0415989		0.629467	0.037549	Welch's t-test	0.182797		0.514907	0.817529	student's t-test	0.0134273
	10	DG(16:0)(18:0)	C37H72O5	596.538	DEA-SFC/MS/MS	[M + NH4]+	[M + H ‒ Acyl FA]+	614.55 > 341.3	614.55 > 313.25		4.3±0.16	1021728	1349822	1240354	1087460	831495	1213663	1311754	1046197	1557733	1261066	1273099	1031869		15:0-18:1 (d7) DG (IS)	0.0331201	0.0407538	0.0271895	0.0240916	0.021789	0.0259017	0.0294983	0.0224374	0.0349223	0.0256081	0.0267619	0.0216307		0.710269	0.168308	student's t-test	0.0760544		0.851974	0.312095	student's t-test	0.337249
	11	DG(16:0)(18:1)	C37H70O5	594.522	DEA-SFC/MS/MS	[M + NH4]+	[M + H ‒ Acyl FA]+	612.55 > 339.3	612.55 > 313.25		4.3±0.16	21000773	27291654	18852797	16888018	15179182	21381195	18442238	12233924	16695713	17583092	15235782	12896752		15:0-18:1 (d7) DG (IS)	0.680756	0.82399	0.413268	0.374137	0.397764	0.456312	0.414723	0.262376	0.374295	0.357055	0.320272	0.270351		0.640357	0.079109	student's t-test	0.134486		0.901353	0.466331	student's t-test	0.542754
	12	DG(16:0)(18:2)	C37H68O5	592.507	DEA-SFC/MS/MS	[M + NH4]+	[M + H ‒ Acyl FA]+	610.55 > 337.25	610.55 > 313.25		4.34±0.17	16413404	20617874	12545543	12790064	13099557	16981155	8757318	4790778	9179704	8857978	6424997	5266093		15:0-18:1 (d7) DG (IS)	0.532053	0.622495	0.275008	0.283351	0.343269	0.362408	0.196932	0.102746	0.205797	0.179876	0.13506	0.110391		0.691842	0.0994754	student's t-test	0.241039		0.841443	0.551207	student's t-test	0.528362
	13	DG(16:0)(20:1)	C39H74O5	622.554	DEA-SFC/MS/MS	[M + NH4]+	[M + H ‒ Acyl FA]+	640.6 > 367.3	640.6 > 313.25		4.34±0.17	197768	253838	262128	189468	124039	225194	391788	224592	465722	381386	307385	285946		15:0-18:1 (d7) DG (IS)	0.0064108	0.00766388	0.00574605	0.00419747	0.00325039	0.00480603	0.00881041	0.00481674	0.0104409	0.0077447	0.00646156	0.0059942		0.618236	0.78642	student's t-test	0.0250205		0.839307	0.178697	student's t-test	0.502345
	14	DG(16:0)(20:4)	C39H68O5	616.507	DEA-SFC/MS/MS	[M + NH4]+	[M + H ‒ Acyl FA]+	634.55 > 361.25	634.55 > 313.25		4.42±0.18	293583	434325	377380	318506	241893	336922	338498	271293	356412	325985	274022	229021		15:0-18:1 (d7) DG (IS)	0.00951671	0.0131131	0.00827246	0.00705617	0.00633871	0.00719051	0.00761204	0.00581832	0.00799028	0.00661969	0.00576023	0.0048009		0.666144	0.0642462	student's t-test	0.0801503		0.802068	0.761522	student's t-test	0.172226
	15	DG(16:0)(22:6)	C41H68O5	640.507	DEA-SFC/MS/MS	[M + NH4]+	[M + H ‒ Acyl FA]+	658.55 > 385.25	658.55 > 313.25		4.55±0.19	1028799	1023052	1084370	812812	976594	943576	2844864	1655033	2307439	1773876	2094364	1571297		15:0-18:1 (d7) DG (IS)	0.0333493	0.030888	0.0237702	0.018007	0.0255912	0.0201376	0.0639744	0.0354949	0.0517297	0.0360216	0.0440257	0.0329386		0.724209	0.764126	student's t-test	0.0911789		0.747267	0.276543	student's t-test	0.224993
	16	DG(18:0)(18:1)	C39H74O5	622.554	DEA-SFC/MS/MS	[M + NH4]+	[M + H ‒ Acyl FA]+	640.6 > 339.3	640.6 > 341.3		4.35±0.17	1194215	1876246	1487992	1456453	928625	1514208	820286	576229	782167	983604	778352	495302		15:0-18:1 (d7) DG (IS)	0.0387114	0.0566476	0.0326179	0.0322662	0.0243342	0.0323159	0.0184463	0.0123582	0.0175351	0.0199738	0.0163618	0.0103829		0.694784	0.238265	student's t-test	0.165442		0.966462	0.629728	student's t-test	0.880675
	17	DG(18:0)(18:2)	C39H72O5	620.538	DEA-SFC/MS/MS	[M + NH4]+	[M + H ‒ Acyl FA]+	638.55 > 337.25	638.55 > 341.3		4.39±0.18	1495504	2049834	1620275	1682788	1236908	1751788	732269	455973	846614	912890	626482	457840		15:0-18:1 (d7) DG (IS)	0.0484779	0.0618886	0.0355177	0.0372804	0.0324127	0.0373862	0.016467	0.00977908	0.0189799	0.0185378	0.0131693	0.00959756		0.734002	0.0887484	student's t-test	0.172063		0.913293	0.944817	student's t-test	0.74692
	18	DG(18:0)(20:4)	C41H72O5	644.538	DEA-SFC/MS/MS	[M + NH4]+	[M + H ‒ Acyl FA]+	662.55 > 361.25	662.55 > 341.3		4.46±0.19	1347562	2616822	2730611	2676620	1177276	2478372	999856	1217582	1549258	1817774	1405663	996923		15:0-18:1 (d7) DG (IS)	0.0436822	0.0790071	0.0598571	0.0592978	0.03085	0.0528928	0.0224845	0.026113	0.0347323	0.036913	0.0295485	0.0208982		0.783585	0.831894	student's t-test	0.380066		1.04836	0.762326	student's t-test	0.830584
	19	DG(18:0)(22:6)	C43H72O5	668.538	DEA-SFC/MS/MS	[M + NH4]+	[M + H ‒ Acyl FA]+	686.55 > 385.25	686.55 > 341.3		4.59±0.19	587533	722532	754959	440986	400125	583058	665313	384736	825131	774211	668691	618592		15:0-18:1 (d7) DG (IS)	0.0190453	0.0218147	0.0165493	0.00976959	0.0104851	0.0124435	0.0149614	0.00825129	0.0184983	0.0157217	0.0140566	0.0129673		0.569562	0.432855	student's t-test	0.00868079		1.02481	0.132643	student's t-test	0.917037
	20	DG(18:1)(18:1)	C39H72O5	620.538	DEA-SFC/MS/MS	[M + NH4]+	[M + H ‒ Acyl FA]+	638.55 > 339.3			4.37±0.18	8660333	11030735	5424428	5473860	5748104	7078650	5000668	2080469	3900724	3804793	2745996	2249395		15:0-18:1 (d7) DG (IS)	0.280731	0.33304	0.118908	0.121268	0.150627	0.151071	0.112454	0.044619	0.087449	0.0772629	0.0577237	0.0471534		0.577286	0.0457457	Welch's t-test	0.248714		0.744883	0.330943	student's t-test	0.391831
	21	DG(18:1)(18:2)	C39H70O5	618.522	DEA-SFC/MS/MS	[M + NH4]+	[M + H ‒ Acyl FA]+	636.55 > 337.25	636.55 > 339.3		4.42±0.19	14272960	17879105	8409606	8654997	9664201	10729576	6426760	2613915	6079865	5144027	3269466	2562035		15:0-18:1 (d7) DG (IS)	0.462669	0.539806	0.184345	0.191743	0.253246	0.228988	0.144523	0.0560596	0.136302	0.104458	0.0687276	0.0537071		0.567885	0.0534362	student's t-test	0.193261		0.673503	0.443013	student's t-test	0.315536
	22	DG(18:1)(20:1)	C41H76O5	648.569	DEA-SFC/MS/MS	[M + NH4]+	[M + H ‒ Acyl FA]+	666.6 > 367.3	666.6 > 339.3		4.42±0.19	266946	358480	209191	214048	213805	219120	209091	81535	186840	169684	116247	98654		15:0-18:1 (d7) DG (IS)	0.00865325	0.0108232	0.00458563	0.00474201	0.00560267	0.0046764	0.00470198	0.00174865	0.0041887	0.00344573	0.00244363	0.00206805		0.624263	0.0519068	student's t-test	0.179087		0.747925	0.338463	student's t-test	0.42166
	23	DG(18:1)(20:4)	C41H70O5	642.522	DEA-SFC/MS/MS	[M + NH4]+	[M + H ‒ Acyl FA]+	660.55 > 361.25	660.55 > 339.3		4.51±0.19	297631	333254	268268	230119	188049	268262	248386	138056	232713	226304	177498	157909		15:0-18:1 (d7) DG (IS)	0.00964793	0.0100616	0.00588064	0.00509805	0.00492775	0.00572518	0.00558563	0.00296083	0.00521711	0.00459549	0.00373119	0.0033102		0.615509	0.0643237	student's t-test	0.0723051		0.845484	0.35069	student's t-test	0.476526
	24	DG(18:1)(22:6)	C43H70O5	666.522	DEA-SFC/MS/MS	[M + NH4]+	[M + H ‒ Acyl FA]+	684.55 > 385.25	684.55 > 339.3		4.64±0.18	840210	1047568	1210252	739817	676071	794643	2248467	1002402	1271718	2139272	2041086	2082524		15:0-18:1 (d7) DG (IS)	0.027236	0.0316282	0.0265297	0.0163899	0.0177162	0.0169591	0.0505628	0.0214981	0.0285102	0.0434416	0.0429058	0.0436553		0.597995	0.109667	student's t-test	0.0022213		1.29264	0.0012954	Welch's t-test	0.379036
	25	DG(18:2)(18:2)	C39H68O5	616.507	DEA-SFC/MS/MS	[M + NH4]+	[M + H ‒ Acyl FA]+	634.55 > 337.25			4.47±0.19	4190789	5066777	2709607	2837951	3077221	3456881	1776659	680708	1919055	1383805	831935	703056		15:0-18:1 (d7) DG (IS)	0.135848	0.152976	0.0593967	0.0628719	0.0806373	0.0737759	0.039953	0.0145989	0.0430226	0.0281005	0.0174881	0.0147379		0.623987	0.0626381	student's t-test	0.209661		0.618262	0.339695	student's t-test	0.277468
	26	DG(18:2)(20:1)	C41H74O5	646.554	DEA-SFC/MS/MS	[M + NH4]+	[M + H ‒ Acyl FA]+	664.6 > 367.3	664.6 > 337.25		4.47±0.19	292119	402131	246454	257320	253473	281911	146646	62227	213602	143054	101760	82619		15:0-18:1 (d7) DG (IS)	0.00946925	0.0121411	0.00540246	0.00570066	0.00664216	0.00601647	0.00329773	0.00133456	0.00478867	0.00290496	0.0021391	0.00173192		0.67965	0.0391011	Welch's t-test	0.277698		0.719245	0.211397	student's t-test	0.451399
	27	DG(18:2)(20:4)	C41H68O5	640.507	DEA-SFC/MS/MS	[M + NH4]+	[M + H ‒ Acyl FA]+	658.55 > 361.25	658.55 > 337.25		4.56±0.18	182784	209882	130027	138492	125133	134141	102991	52380	112226	123897	71368	76106		15:0-18:1 (d7) DG (IS)	0.00592508	0.00633676	0.00285029	0.00306815	0.00327906	0.0028628	0.00231603	0.00112337	0.00251596	0.00251594	0.00150023	0.00159539		0.609445	0.0235869	Welch's t-test	0.214442		0.94227	0.713878	student's t-test	0.84291
	28	DG(18:2)(22:6)	C43H68O5	664.507	DEA-SFC/MS/MS	[M + NH4]+	[M + H ‒ Acyl FA]+	682.55 > 385.25	682.55 > 337.25		4.7±0.17	493702	657332	781329	544737	476479	563720	781324	383266	580512	907472	871563	871459		15:0-18:1 (d7) DG (IS)	0.0160037	0.0198462	0.0171273	0.0120681	0.0124859	0.0120308	0.0175702	0.00821976	0.0130143	0.0184278	0.0183212	0.0182681		0.690576	0.0321959	Welch's t-test	0.0390098		1.41781	0.000604676	Welch's t-test	0.183204
	29	DG(20:4)(22:6)	C45H68O5	688.507	DEA-SFC/MS/MS	[M + NH4]+	[M + H ‒ Acyl FA]+	706.55 > 385.25	706.55 > 361.25		4.79±0.18	13775	16634	30479	16341	12177	15218	46925	21337	49921	31925	39729	41137		15:0-18:1 (d7) DG (IS)	0.000446527	0.000502214	0.000668123	0.000362018	0.000319093	0.000324779	0.00105524	0.000457606	0.00111916	0.000648292	0.000835145	0.000862342		0.622124	0.0785991	student's t-test	0.0399708		0.891253	0.185083	student's t-test	0.688406
	30	DG(22:6)(22:6)	C47H68O5	712.507	DEA-SFC/MS/MS	[M + NH4]+	[M + H ‒ Acyl FA]+	730.55 > 385.25			4.91±0.17	36462	34695	60580	25872	15138	21462	93425	37500	58661	62052	70590	43667		15:0-18:1 (d7) DG (IS)	0.00118194	0.00104751	0.00132796	0.000573167	0.000396685	0.000458037	0.00210091	0.000804248	0.0013151	0.00126007	0.00148388	0.000915378		0.401384	0.579571	student's t-test	0.00179057		0.867085	0.322483	student's t-test	0.673312
	31	FFA(16:0)	C16H32O2	256.24	DEA-SFC/MS/MS	[M ‒ H]‒	[M ‒ H]‒	255.25 > 255.25			5.06±0.06	5955404	8569037	4362203	4559361	4490750	4726423	5145695	4349431	4448557	3880122	3752120	4454213		FA(17:0) (IS)	3.76717	4.12753	3.16708	3.10852	3.37744	3.91951	3.89336	3.97343	3.88551	3.04885	2.94205	5.1426		0.94067	0.840507	student's t-test	0.584093		0.947348	0.00307011	Welch's t-test	0.800575
	32	FFA(18:0)	C18H36O2	284.272	DEA-SFC/MS/MS	[M ‒ H]‒	[M ‒ H]‒	283.25 > 283.25			5.1±0.06	4400229	8701200	4510094	6118162	4293437	4764357	3886001	4913728	4756353	3760835	4146844	4866060		FA(17:0) (IS)	2.78342	4.19119	3.27445	4.17129	3.22905	3.95097	2.94024	4.48894	4.15435	2.95512	3.25156	5.6181		1.10755	0.644808	student's t-test	0.504125		1.02083	0.475351	student's t-test	0.937594
	33	FFA(18:1)	C18H34O2	282.256	DEA-SFC/MS/MS	[M ‒ H]‒	[M ‒ H]‒	281.25 > 281.25			5.13±0.06	10425346	12468536	6118316	6161416	6393283	7656848	4868860	3367079	3958075	4804378	3618171	3434408		FA(17:0) (IS)	6.59469	6.00584	4.44206	4.20078	4.80832	6.34965	3.6839	3.076	3.45711	3.7751	2.83702	3.96519		0.901198	0.995703	student's t-test	0.569288		1.03527	0.411036	student's t-test	0.77417
	34	FFA(18:2)	C18H32O2	280.24	DEA-SFC/MS/MS	[M ‒ H]‒	[M ‒ H]‒	279.25 > 279.25			5.19±0.06	4868248	6732485	3085677	3212561	3294467	4080468	1709526	1256893	1599059	1610241	1252302	1111468		FA(17:0) (IS)	3.07947	3.2429	2.24028	2.19029	2.47773	3.38384	1.29347	1.14824	1.39667	1.26527	0.981936	1.28324		0.940346	0.854339	student's t-test	0.738217		0.919777	0.705778	student's t-test	0.445101
	35	FFA(20:1)	C20H38O2	310.287	DEA-SFC/MS/MS	[M ‒ H]‒	[M ‒ H]‒	309.3 > 309.3			5.16±0.06	270194	294213	172087	185187	157570	214142	139109	99085	169283	124114	134514	105336		FA(17:0) (IS)	0.170915	0.141716	0.12494	0.126258	0.118507	0.177583	0.105253	0.0905192	0.147857	0.0975241	0.105473	0.121615		0.965211	0.688655	student's t-test	0.835428		0.944659	0.290541	student's t-test	0.750335
	36	FFA(20:4)	C20H32O2	304.24	DEA-SFC/MS/MS	[M ‒ H]‒	[M ‒ H]‒	303.25 > 303.25			5.33±0.06	347820	423344	234563	235610	223784	270117	265030	161045	161037	215131	172783	171610		FA(17:0) (IS)	0.220018	0.203916	0.170299	0.160636	0.168305	0.224002	0.200528	0.147123	0.140655	0.169042	0.13548	0.198132		0.930516	0.699685	student's t-test	0.607966		1.02938	0.953066	student's t-test	0.864146
	37	FFA(22:6)	C22H32O2	328.24	DEA-SFC/MS/MS	[M ‒ H]‒	[M ‒ H]‒	327.25 > 327.25			5.53±0.07	207016	311947	176484	133056	159145	163400	128394	86878	123435	128132	109419	118332		FA(17:0) (IS)	0.130951	0.150258	0.128132	0.0907161	0.119691	0.135504	0.097146	0.0793675	0.107812	0.100681	0.0857959	0.13662		0.845043	0.438902	student's t-test	0.227435		1.13636	0.464439	student's t-test	0.494592
	38	FFA(30:0)	C30H60O2	452.459	DEA-SFC/MS/MS	[M ‒ H]‒	[M ‒ H]‒	451.45 > 451.45			5.18±0.04	42167	35466	33617	37770	31757	31330	26344	17254	22921	30243	18440	6519		FA(17:0) (IS)	0.0266733	0.0170832	0.0244068	0.0257512	0.0238841	0.0259812	0.0199325	0.0157624	0.0200199	0.0237638	0.0144589	0.0075265		1.10934	0.100039	student's t-test	0.44981		0.821131	0.163775	student's t-test	0.535733
	39	HexCer(d18:1)(16:0)	C40H77O8N1	699.565	DEA-SFC/MS/MS	[M + H]+	[C18H34N]+	700.55 > 264.25			7.74±0.05	64002	99087	99751	122853	48889	137465	24608	40585	22442	37673	36439	22065		HexCer(d18:1/12:0) (IS)	0.00166035	0.00266985	0.00262328	0.00322241	0.00107255	0.00294747	0.000475028	0.000856728	0.0005218	0.000779913	0.000709872	0.000434479		1.04155	0.383512	student's t-test	0.904183		1.03815	0.869627	student's t-test	0.889935
	40	HexCer(d18:1)(18:0)	C42H81O8N1	727.596	DEA-SFC/MS/MS	[M + H]+	[C18H34N]+	728.6 > 264.25			7.68±0.05	322401	755587	1089718	1454861	303435	1636574	118692	513398	140152	504605	332498	165885		HexCer(d18:1/12:0) (IS)	0.00836379	0.0203589	0.0286577	0.0381607	0.00665692	0.0350908	0.00229121	0.0108376	0.00325868	0.0104464	0.00647743	0.00326642		1.39261	0.513016	student's t-test	0.553684		1.23206	0.742623	student's t-test	0.728778
	41	HexCer(d18:1)(20:0)	C44H85O8N1	755.628	DEA-SFC/MS/MS	[M + H]+	[C18H34N]+	756.65 > 264.25			7.65±0.06	265872	739476	1162327	1337177	251869	1611044	102143	459089	117851	501110	319240	137857		HexCer(d18:1/12:0) (IS)	0.0068973	0.0199248	0.0305672	0.0350739	0.00552564	0.0345434	0.00197175	0.00969113	0.00274016	0.0103741	0.00621915	0.00271453		1.30935	0.659128	student's t-test	0.645679		1.34053	0.896898	student's t-test	0.646845
	42	HexCer(d18:1)(22:0)	C46H89O8N1	783.659	DEA-SFC/MS/MS	[M + H]+	[C18H34N]+	784.65 > 264.25			7.62±0.06	710251	1741044	2704797	3139924	625356	3924898	211214	1076775	265924	1167219	733429	299763		HexCer(d18:1/12:0) (IS)	0.0184255	0.0469116	0.0711314	0.0823596	0.0137194	0.0841562	0.00407723	0.0227302	0.00618301	0.024164	0.014288	0.0059026		1.32071	0.602942	student's t-test	0.626767		1.34447	0.889271	student's t-test	0.657193
	43	HexCer(d18:1)(22:6)	C46H77O8N1	771.565	DEA-SFC/MS/MS	[M + H]+	[C18H34N]+	772.55 > 264.25			7.96±0.07	243947	666049	916421	1187810	236764	1357762	101873	441002	151370	511160	385490	157144		HexCer(d18:1/12:0) (IS)	0.00632852	0.0179464	0.0241003	0.031156	0.00519426	0.0291126	0.00196654	0.00930932	0.00351951	0.0105821	0.00750977	0.0030943		1.35323	0.562038	student's t-test	0.593322		1.43195	0.972279	student's t-test	0.531832
	44	HexCer(d18:1)(24:0)	C48H93O8N1	811.69	DEA-SFC/MS/MS	[M + H]+	[C18H34N]+	812.7 > 264.25			7.58±0.06	2266362	5336615	8449535	10208108	2150929	12022144	788948	3333401	1018630	3724801	2323152	1178920		HexCer(d18:1/12:0) (IS)	0.0587944	0.143793	0.222208	0.267757	0.0471882	0.257774	0.0152297	0.0703663	0.0236842	0.0771114	0.0452576	0.023214		1.34822	0.601884	student's t-test	0.597163		1.3322	0.908705	student's t-test	0.629639
	45	LPC(16:0)_sn1	C24H50O7N1P1	495.332	DEA-SFC/MS/MS	[M + H]+	[C5H15O4NP]+	496.35 > 184.05			8.81±0.05	14226525	18497584	16369927	11780995	12675751	17846466	20002624	20674993	19400371	18878346	19099389	17054834		18:1 (d7) LPC (IS)	0.105916	0.13134	0.0981873	0.0725156	0.0765623	0.0886945	0.111221	0.119296	0.118638	0.100316	0.104773	0.0881086		0.708829	0.381362	student's t-test	0.0430418		0.839732	0.425382	student's t-test	0.0293008
	46	LPC(16:0)_sn2	C24H50O7N1P1	495.332	DEA-SFC/MS/MS	[M + H]+	[C5H15O4NP]+	496.35 > 184.05			8.9±0.05	3007028	3552264	2800696	2185514	2639714	3082461	2113983	2829289	2986512	2561286	2903429	2323248		18:1 (d7) LPC (IS)	0.0223873	0.0252225	0.0167987	0.0134525	0.015944	0.0153194	0.0117545	0.0163252	0.0182633	0.0136102	0.0159272	0.0120024		0.694256	0.167613	student's t-test	0.0640516		0.896355	0.516945	student's t-test	0.514374
	47	LPC(18:0)_sn1	C26H54O7N1P1	523.364	DEA-SFC/MS/MS	[M + H]+	[C5H15O4NP]+	524.35 > 184.05			8.73±0.05	6977314	9190319	8538168	7026538	7011098	10629896	5406572	6773810	6789924	7349546	6703556	6463106		18:1 (d7) LPC (IS)	0.0519461	0.0652549	0.0512122	0.0432505	0.0423474	0.0528291	0.0300624	0.0390853	0.0415222	0.039054	0.0367734	0.0333897		0.821949	0.701312	student's t-test	0.152331		0.986873	0.364495	student's t-test	0.906084
	48	LPC(18:0)_sn2	C26H54O7N1P1	523.364	DEA-SFC/MS/MS	[M + H]+	[C5H15O4NP]+	524.35 > 184.05			8.81±0.05	863984	1114161	1062514	679714	1060200	980320	854992	745426	960417	830139	838180	595961		18:1 (d7) LPC (IS)	0.00643236	0.00791098	0.00637299	0.00418385	0.00640367	0.00487206	0.00475405	0.00430115	0.0058732	0.00441119	0.00459797	0.00307885		0.74625	0.740553	student's t-test	0.101396		0.809733	0.976542	student's t-test	0.229696
	49	LPC(18:1)_sn1	C26H52O7N1P1	521.348	DEA-SFC/MS/MS	[M + H]+	[C5H15O4NP]+	522.35 > 184.05			8.84±0.05	1767713	2542401	1909619	1403521	1271003	1971624	1643760	1909273	1862935	1340334	1415513	1226297		18:1 (d7) LPC (IS)	0.0131606	0.0180521	0.011454	0.0086391	0.00767693	0.0097987	0.00913986	0.0110166	0.0113923	0.00712226	0.00776502	0.00633529		0.612065	0.175571	student's t-test	0.0560943		0.67269	0.520858	student's t-test	0.0131707
	50	LPC(18:1)_sn2	C26H52O7N1P1	521.348	DEA-SFC/MS/MS	[M + H]+	[C5H15O4NP]+	522.35 > 184.05			8.93±0.05	2063078	2815827	1875755	1838453	1840768	2289674	1300056	1540580	1669515	1592831	1393066	1261036		18:1 (d7) LPC (IS)	0.0153596	0.0199935	0.0112508	0.0113162	0.0111183	0.0113794	0.00722875	0.00888923	0.0102095	0.00846398	0.00764188	0.00651476		0.72556	0.0019369	Welch's t-test	0.233334		0.859201	0.600669	student's t-test	0.296858
	51	LPC(18:2)_sn1	C26H50O7N1P1	519.332	DEA-SFC/MS/MS	[M + H]+	[C5H15O4NP]+	520.35 > 184.05			8.95±0.05	1807027	2233649	1611143	1310703	1582751	1526089	1421738	1771883	2157648	1425352	1454454	1389701		18:1 (d7) LPC (IS)	0.0134533	0.0158598	0.00966368	0.00806778	0.00955991	0.00758445	0.00790535	0.0102239	0.0131946	0.00757403	0.00797864	0.00717947		0.64685	0.196051	student's t-test	0.0730616		0.725715	0.0444218	Welch's t-test	0.200006
	52	LPC(18:2)_sn2	C26H50O7N1P1	519.332	DEA-SFC/MS/MS	[M + H]+	[C5H15O4NP]+	520.35 > 184.05			9.04±0.05	2942825	3730893	2832142	2974117	3343490	3868604	1613511	1855328	2330367	2141107	2049657	2239417		18:1 (d7) LPC (IS)	0.0219093	0.0264908	0.0169873	0.0183066	0.0201949	0.0192264	0.00897167	0.0107053	0.0142508	0.0113774	0.0112437	0.0115693		0.88286	0.0759435	student's t-test	0.413076		1.00774	0.00736891	Welch's t-test	0.960235
	53	LPC(20:0)_sn1	C28H58O7N1P1	551.395	DEA-SFC/MS/MS	[M + H]+	[C5H15O4NP]+	552.4 > 184.05			8.67±0.06	296059	312570	394292	241669	183177	369772	381346	309840	402374	395603	356979	293325		18:1 (d7) LPC (IS)	0.00220416	0.00221937	0.00236498	0.00148755	0.0011064	0.00183772	0.00212041	0.00178779	0.00246062	0.00210215	0.00195826	0.00151537		0.652819	0.11128	student's t-test	0.0224524		0.875482	0.90493	student's t-test	0.370881
	54	LPC(20:0)_sn2	C28H58O7N1P1	551.395	DEA-SFC/MS/MS	[M + H]+	[C5H15O4NP]+	552.4 > 184.05				n.d.	n.d.	n.d.	n.d.	n.d.	n.d.	n.d.	n.d.	n.d.	n.d.	n.d.	n.d.		18:1 (d7) LPC (IS)	0	0	0	0	0	0	0	0	0	0	0	0		#DIV/0!	#DIV/0!	#DIV/0!	#DIV/0!		#DIV/0!	#DIV/0!	#DIV/0!	#DIV/0!
	55	LPC(20:4)_sn1	C28H50O7N1P1	543.332	DEA-SFC/MS/MS	[M + H]+	[C5H15O4NP]+	544.35 > 184.05			9.01±0.06	220999	217201	250825	166596	189593	224515	208954	240057	341332	199181	240584	200910		18:1 (d7) LPC (IS)	0.00164534	0.00154221	0.00150446	0.00102545	0.00114515	0.00111581	0.00116186	0.00138514	0.00208733	0.00105841	0.00131976	0.00103794		0.700428	0.845238	student's t-test	0.00107168		0.737131	0.191457	student's t-test	0.238321
	56	LPC(20:4)_sn2	C28H50O7N1P1	543.332	DEA-SFC/MS/MS	[M + H]+	[C5H15O4NP]+	544.35 > 184.05			9.09±0.06	1099457	1732655	965599	1013608	848924	1022761	1339606	983839	1587327	1260122	987893	774905		18:1 (d7) LPC (IS)	0.00818545	0.0123025	0.00579169	0.00623907	0.00512755	0.00508298	0.00744866	0.00567681	0.00970692	0.00669603	0.00541924	0.00400331		0.625944	0.0761021	student's t-test	0.166243		0.705953	0.615594	student's t-test	0.185599
	57	LPC(22:0)_sn1	C30H62O7N1P1	579.426	DEA-SFC/MS/MS	[M + H]+	[C5H15O4NP]+	580.45 > 184.05			8.78±0.06	7096261	7119741	8283888	4889535	6024602	6986591	15651708	11440343	9690516	11675152	14061067	10668551		18:1 (d7) LPC (IS)	0.0528316	0.050553	0.049687	0.0300966	0.036389	0.0347224	0.0870288	0.0660114	0.05926	0.0620394	0.0771342	0.0551158		0.66118	0.397757	student's t-test	0.00119343		0.915163	0.753436	student's t-test	0.601103
	58	LPC(22:0)_sn2	C30H62O7N1P1	579.426	DEA-SFC/MS/MS	[M + H]+	[C5H15O4NP]+	580.45 > 184.05				n.d.	n.d.	n.d.	n.d.	n.d.	n.d.	n.d.	n.d.	n.d.	n.d.	n.d.	n.d.		18:1 (d7) LPC (IS)	0	0	0	0	0	0	0	0	0	0	0	0		#DIV/0!	#DIV/0!	#DIV/0!	#DIV/0!		#DIV/0!	#DIV/0!	#DIV/0!	#DIV/0!
	59	LPC(22:6)_sn1	C30H50O7N1P1	567.332	DEA-SFC/MS/MS	[M + H]+	[C5H15O4NP]+	568.35 > 184.05			9.12±0.07	794891	636603	672437	640344	369425	593481	361388	341757	489950	284146	373283	266010		18:1 (d7) LPC (IS)	0.00591796	0.00452013	0.0040333	0.00394151	0.00223135	0.00294952	0.00200944	0.00197196	0.00299617	0.00150989	0.0020477	0.00137426		0.630373	0.87033	student's t-test	0.076622		0.706816	0.546571	student's t-test	0.15803
	60	LPC(22:6)_sn2	C30H50O7N1P1	567.332	DEA-SFC/MS/MS	[M + H]+	[C5H15O4NP]+	568.35 > 184.05			9.19±0.06	7255067	12852815	5061897	6206015	4093235	4794006	5550046	2778381	4912894	3863771	3714092	2491545		18:1 (d7) LPC (IS)	0.0540139	0.0912601	0.0303614	0.0381999	0.0247234	0.0238255	0.0308601	0.0160314	0.0300436	0.0205313	0.0203742	0.0128718		0.493914	0.128729	student's t-test	0.181214		0.698995	0.43235	student's t-test	0.228614
	61	LPE(16:0)_sn1	C21H44O7N1P1	453.286	DEA-SFC/MS/MS	[M + H]+	[C5H15O4NP]+	454.3 > 313.25			10.72±0.11	65692	96505	63135	46268	53702	61787	99925	75299	76218	65113	79590	65512		18:1 (d7) LPE (IS)	0.0266526	0.0412395	0.0248438	0.0202275	0.0217247	0.0233732	0.0361989	0.0293476	0.0313181	0.0257486	0.0304834	0.0255493		0.704424	0.05945	student's t-test	0.157929		0.844283	0.770751	student's t-test	0.125006
	62	LPE(16:0)_sn2	C21H44O7N1P1	453.286	DEA-SFC/MS/MS	[M + H]+	[C5H15O4NP]+	454.3 > 313.25			10.87±0.12	17420	38378	32988	25860	21095	28312	21159	28673	22617	22702	26658	17303		18:1 (d7) LPE (IS)	0.00706765	0.0164001	0.0129809	0.0113055	0.00853382	0.01071	0.00766508	0.0111752	0.00929337	0.00897738	0.0102102	0.00674807		0.838149	0.174344	student's t-test	0.528584		0.92187	0.99896	student's t-test	0.636188
	63	LPE(18:0)_sn1	C23H48O7N1P1	481.317	DEA-SFC/MS/MS	[M + H]+	[C5H15O4NP]+	482.3 > 341.3			10.61±0.11	190555	270587	163954	118844	134372	169966	161665	122935	128976	120046	119777	119816		18:1 (d7) LPE (IS)	0.0773121	0.11563	0.0645163	0.0519564	0.0543591	0.0642958	0.0585649	0.0479137	0.0529965	0.0474715	0.0458752	0.0467276		0.662675	0.114086	student's t-test	0.141127		0.878346	0.0439714	Welch's t-test	0.167623
	64	LPE(18:0)_sn2	C23H48O7N1P1	481.317	DEA-SFC/MS/MS	[M + H]+	[C5H15O4NP]+	482.3 > 341.3				n.d.	n.d.	n.d.	n.d.	n.d.	n.d.	n.d.	n.d.	n.d.	n.d.	n.d.	n.d.		18:1 (d7) LPE (IS)	0	0	0	0	0	0	0	0	0	0	0	0		#DIV/0!	#DIV/0!	#DIV/0!	#DIV/0!		#DIV/0!	#DIV/0!	#DIV/0!	#DIV/0!
	65	LPE(18:1)_sn1	C23H46O7N1P1	479.301	DEA-SFC/MS/MS	[M + H]+	[C5H15O4NP]+	480.3 > 339.3			10.75±0.12	52779	90186	71155	64880	36550	77997	40935	33398	31036	40617	41381	30504		18:1 (d7) LPE (IS)	0.0214135	0.0385392	0.0279997	0.0283643	0.014786	0.0295052	0.0148292	0.0130168	0.0127528	0.0160618	0.0158491	0.0118964		0.826078	0.946567	student's t-test	0.499306		1.07903	0.37683	student's t-test	0.516131
	66	LPE(18:1)_sn2	C23H46O7N1P1	479.301	DEA-SFC/MS/MS	[M + H]+	[C5H15O4NP]+	480.3 > 339.3			10.9±0.12	137908	427055	463156	486048	93717	452244	80883	166311	65253	187855	188218	71499		18:1 (d7) LPE (IS)	0.0559521	0.182494	0.182253	0.212491	0.0379125	0.171078	0.0293008	0.0648194	0.0268126	0.0742862	0.0720885	0.0278842		1.00186	0.78067	student's t-test	0.997099		1.44096	0.794892	student's t-test	0.412937
	67	LPE(18:2)_sn1	C23H44O7N1P1	477.286	DEA-SFC/MS/MS	[M + H]+	[C5H15O4NP]+	478.3 > 337.25			10.9±0.12	11825	19060	13931	11751	10201	13415	9427	7354	9139	7710	9502	5872		18:1 (d7) LPE (IS)	0.00479765	0.00814492	0.00548188	0.00513732	0.00412673	0.00507471	0.00341504	0.00286621	0.00375523	0.00304888	0.00363932	0.00229005		0.778247	0.185988	student's t-test	0.272826		0.894561	0.610945	student's t-test	0.493455
	68	LPE(18:2)_sn2	C23H44O7N1P1	477.286	DEA-SFC/MS/MS	[M + H]+	[C5H15O4NP]+	478.3 > 337.25			11.05±0.12	37021	50947	35479	31053	32526	38513	21820	18404	20343	23094	21156	17246		18:1 (d7) LPE (IS)	0.0150202	0.0217712	0.0139611	0.0135758	0.0131581	0.0145689	0.00790454	0.00717292	0.00835898	0.00913239	0.00810286	0.00672584		0.81381	0.0568557	student's t-test	0.27316		1.02239	0.394362	student's t-test	0.833168
	69	LPE(20:4)_sn1	C25H44O7N1P1	501.286	DEA-SFC/MS/MS	[M + H]+	[C5H15O4NP]+	502.3 > 361.25			11.11±0.12	n.d.	n.d.	n.d.	n.d.	n.d.	n.d.	n.d.	n.d.	n.d.	n.d.	n.d.	n.d.		18:1 (d7) LPE (IS)	0	0	0	0	0	0	0	0	0	0	0	0		#DIV/0!	#DIV/0!	#DIV/0!	#DIV/0!		#DIV/0!	#DIV/0!	#DIV/0!	#DIV/0!
	70	LPE(20:4)_sn2	C25H44O7N1P1	501.286	DEA-SFC/MS/MS	[M + H]+	[C5H15O4NP]+	502.3 > 361.25				50656	90487	47888	43825	30959	50366	44398	33712	37029	39628	40585	27131		18:1 (d7) LPE (IS)	0.0205522	0.0386678	0.018844	0.0191595	0.0125242	0.0190528	0.0160837	0.0131392	0.0152153	0.0156707	0.0155443	0.0105809		0.649934	0.21378	student's t-test	0.246218		0.940541	0.427257	student's t-test	0.665437
	71	LPE(22:6)_sn1	C27H44O7N1P1	525.286	DEA-SFC/MS/MS	[M + H]+	[C5H15O4NP]+	526.3 > 385.25			11.24±0.13	n.d.	n.d.	n.d.	n.d.	n.d.	n.d.	n.d.	n.d.	n.d.	n.d.	n.d.	n.d.		18:1 (d7) LPE (IS)	0	0	0	0	0	0	0	0	0	0	0	0		#DIV/0!	#DIV/0!	#DIV/0!	#DIV/0!		#DIV/0!	#DIV/0!	#DIV/0!	#DIV/0!
	72	LPE(22:6)_sn2	C27H44O7N1P1	525.286	DEA-SFC/MS/MS	[M + H]+	[C5H15O4NP]+	526.3 > 385.25				613349	924993	485050	414282	406650	417859	519709	327263	455162	385401	375455	341899		18:1 (d7) LPE (IS)	0.248848	0.395278	0.190868	0.181116	0.164507	0.15807	0.18827	0.12755	0.187027	0.152405	0.143801	0.133339		0.60323	0.0251627	Welch's t-test	0.209818		0.854224	0.140743	student's t-test	0.304871
	73	MG(18:0)	C21H42O4	358.308	DEA-SFC/MS/MS	[M + H]+	[M + H ‒ H2O]+	359.3 > 341.3			5.1±0.09	82922	120431	77827	1724651	136956	282491	119731	395118	146664	123556	179286	118397		18:1 (d7) MG (IS)	0.386169	0.518429	0.289535	5.12237	0.593448	0.975419	0.313235	1.62895	0.399021	0.315952	0.495717	0.400667		5.60343	0.00417695	Welch's t-test	0.333669		0.517825	0.0294128	Welch's t-test	0.469849
	74	PC(16:0)(16:0)	C40H80O8N1P1	761.593	DEA-SFC/MS/MS	[M + CH3COO]‒	[Acyl FA ‒ H]‒	792.6 > 255.25			7.47±0.08	10367559	9052780	8945170	6750814	8659075	8435251	11723777	10185166	12069480	9918269	9284193	10007814		15:0-18:1 (d7) PC (IS)	0.22135	0.230997	0.214865	0.165845	0.190118	0.218377	0.278657	0.260903	0.342789	0.238564	0.252836	0.247191		0.860805	0.174052	student's t-test	0.12314		0.837074	0.0541761	student's t-test	0.130161
	75	PC(16:0)(18:0)	C42H84O8N1P1	759.578	DEA-SFC/MS/MS	[M + CH3COO]‒	[Acyl FA ‒ H]‒	820.6 > 255.25	820.6 > 283.25		7.46±0.09	2635924	2473400	2613422	2361940	2408591	2444349	1773048	1876331	2098245	1927969	1882458	1892667		15:0-18:1 (d7) PC (IS)	0.0562777	0.063113	0.0627751	0.0580249	0.0528829	0.0632807	0.0421428	0.0480641	0.0595928	0.0463734	0.0512648	0.0467486		0.956209	0.708926	student's t-test	0.515925		0.963866	0.172026	student's t-test	0.753278
	76	PC(16:0)(18:1)	C42H82O8N1P1	757.562	DEA-SFC/MS/MS	[M + CH3COO]‒	[Acyl FA ‒ H]‒	818.6 > 255.25	818.6 > 281.25		7.5±0.09	17367488	17668567	17756969	16661275	13574328	17908917	23616735	23512305	23791071	22665849	22499448	21830511		15:0-18:1 (d7) PC (IS)	0.370801	0.450843	0.426527	0.409311	0.298037	0.463637	0.561336	0.602291	0.675697	0.545181	0.612726	0.53921		0.938161	0.382278	student's t-test	0.659705		0.922686	0.663591	student's t-test	0.311194
	77	PC(16:0)(18:2)	C42H80O8N1P1	787.609	DEA-SFC/MS/MS	[M + CH3COO]‒	[Acyl FA ‒ H]‒	816.6 > 255.25	816.6 > 279.25		7.57±0.08	11682826	11231864	10220715	10103517	12634386	11996513	15353354	15452602	16961293	17659127	17416511	17333674		15:0-18:1 (d7) PC (IS)	0.249431	0.2866	0.245504	0.248209	0.2774	0.310573	0.364927	0.395834	0.481722	0.424755	0.474303	0.428139		1.06992	0.69129	student's t-test	0.459326		1.06818	0.346061	student's t-test	0.503127
	78	PC(16:0)(20:1)	C44H86O8N1P1	781.562	DEA-SFC/MS/MS	[M + CH3COO]‒	[Acyl FA ‒ H]‒	846.6 > 255.25	846.6 > 309.3		7.48±0.09	316433	271648	300214	227057	247823	264874	366436	348570	469905	407689	323697	365879		15:0-18:1 (d7) PC (IS)	0.00675593	0.00693156	0.00721122	0.00557802	0.00544119	0.00685721	0.00870966	0.00892896	0.0133459	0.00980614	0.00881522	0.00903715		0.855384	0.15911	student's t-test	0.098713		0.892656	0.0760412	student's t-test	0.511332
	79	PC(16:0)(20:4)	C44H80O8N1P1	805.562	DEA-SFC/MS/MS	[M + CH3COO]‒	[Acyl FA ‒ H]‒	840.6 > 255.25	840.6 > 303.25		7.59±0.09	4240589	3801355	3734445	2925608	3354514	3332337	12095599	11725577	12182253	11232069	10472509	10213602		15:0-18:1 (d7) PC (IS)	0.0905377	0.096998	0.0897024	0.0718723	0.0736516	0.0862695	0.287495	0.300362	0.345991	0.270165	0.285197	0.252274		0.83608	0.411151	student's t-test	0.0407642		0.864847	0.4466	student's t-test	0.104929
	80	PC(16:0)(22:6)	C46H80O8N1P1	789.625	DEA-SFC/MS/MS	[M + CH3COO]‒	[Acyl FA ‒ H]‒	864.6 > 255.25	864.6 > 327.25		7.67±0.09	12161394	10332666	11491205	9405754	10881739	9693968	17961142	15500659	17289570	17754793	17511532	16840044		15:0-18:1 (d7) PC (IS)	0.259649	0.263655	0.276022	0.231067	0.238919	0.250963	0.426911	0.397065	0.491046	0.427056	0.47689	0.415946		0.901947	0.840815	student's t-test	0.026349		1.0037	0.627164	student's t-test	0.963625
	81	PC(18:0)(18:0)	C44H88O8N1P1	787.609	DEA-SFC/MS/MS	[M + CH3COO]‒	[Acyl FA ‒ H]‒	848.65 > 283.25			7.45±0.08	188909	220151	198994	210184	157729	209569	79281	92561	61327	106016	103049	80493		15:0-18:1 (d7) PC (IS)	0.00403326	0.00561752	0.00477989	0.00516351	0.00346309	0.00542545	0.0018844	0.00237104	0.00174176	0.00255	0.00280633	0.00198816		0.973762	0.712484	student's t-test	0.877226		1.22465	0.766655	student's t-test	0.218156
	82	PC(18:0)(18:1)	C44H86O8N1P1	785.593	DEA-SFC/MS/MS	[M + CH3COO]‒	[Acyl FA ‒ H]‒	846.6 > 283.25	846.6 > 281.25		7.47±0.09	4040416	4342662	4417658	4712240	3732911	5096277	1713152	2356401	1969530	2561035	2291980	2025593		15:0-18:1 (d7) PC (IS)	0.086264	0.11081	0.106113	0.115764	0.0819596	0.131935	0.0407192	0.0603615	0.0559372	0.0616005	0.0624173	0.0500318		1.08731	0.414025	student's t-test	0.621835		1.10847	0.62257	student's t-test	0.472675
	83	PC(18:0)(18:2)	C44H84O8N1P1	815.64	DEA-SFC/MS/MS	[M + CH3COO]‒	[Acyl FA ‒ H]‒	844.6 > 283.25	844.6 > 279.25		7.53±0.09	6381813	5780936	5584099	6084944	7570392	6227318	2040063	2276217	2697734	2766651	2448531	2890569		15:0-18:1 (d7) PC (IS)	0.136253	0.14751	0.134132	0.149486	0.166215	0.161216	0.0484894	0.0583075	0.0766191	0.0665462	0.0666807	0.0713966		1.14124	0.824321	student's t-test	0.0383057		1.11563	0.0721703	student's t-test	0.447185
	84	PC(18:0)(20:1)	C46H90O8N1P1	809.593	DEA-SFC/MS/MS	[M + CH3COO]‒	[Acyl FA ‒ H]‒	874.65 > 283.25	874.65 > 309.3		7.46±0.09	104487	84145	93130	55864	82788	69319	21595	43875	42076	50277	27884	29447		15:0-18:1 (d7) PC (IS)	0.00223083	0.0021471	0.00223701	0.00137239	0.00181769	0.00179457	0.000513282	0.0011239	0.00119501	0.00120931	0.000759363	0.000727336		0.753545	0.0771621	student's t-test	0.0211757		0.951916	0.681734	student's t-test	0.873016
	85	PC(18:0)(20:4)	C46H84O8N1P1	833.593	DEA-SFC/MS/MS	[M + CH3COO]‒	[Acyl FA ‒ H]‒	868.6 > 283.25	868.6 > 303.25		7.56±0.09	3038214	2980782	2940254	2418976	2622362	2429802	1948958	2010184	2442727	2282291	2034956	2037457		15:0-18:1 (d7) PC (IS)	0.0648667	0.0760597	0.0706257	0.059426	0.0575765	0.0629041	0.0463239	0.0514928	0.0693766	0.0548959	0.0554178	0.0503249		0.850413	0.378665	student's t-test	0.0424327		0.960795	0.101841	student's t-test	0.775735
	86	PC(18:0)(22:6)	C48H84O8N1P1	785.593	DEA-SFC/MS/MS	[M + CH3COO]‒	[Acyl FA ‒ H]‒	892.6 > 283.25	892.6 > 327.25		7.63±0.09	11221815	9321777	9825581	9283056	9542015	9012533	2904895	2470852	2766450	3262398	3359056	3212640		15:0-18:1 (d7) PC (IS)	0.239589	0.237861	0.236013	0.228053	0.209504	0.233322	0.0690452	0.0632933	0.0785707	0.0784704	0.0914769	0.0793517		0.940314	0.040038	Welch's t-test	0.186122		1.18202	0.940298	student's t-test	0.10472
	87	PC(18:1)(18:1)	C44H84O8N1P1	783.578	DEA-SFC/MS/MS	[M + CH3COO]‒	[Acyl FA ‒ H]‒	844.6 > 281.25			7.53±0.09	1607628	1604316	1444982	1271675	1589563	1437499	1080512	1249824	1475492	1240198	1168625	1240017		15:0-18:1 (d7) PC (IS)	0.0343233	0.0409368	0.0347089	0.0312407	0.0349004	0.0372148	0.0256822	0.0320155	0.0419059	0.0298305	0.0318251	0.0306282		0.939864	0.794072	student's t-test	0.469208		0.926511	0.0297036	Welch's t-test	0.657677
	88	PC(18:1)(18:2)	C44H82O8N1P1	815.64	DEA-SFC/MS/MS	[M + CH3COO]‒	[Acyl FA ‒ H]‒	842.6 > 281.25	842.6 > 279.25		7.6±0.09	2714993	2611071	2276637	2441354	3093908	2776764	1625732	1842206	2339844	1977738	1850734	2310676		15:0-18:1 (d7) PC (IS)	0.0579658	0.0666259	0.0546855	0.0599758	0.0679297	0.0718865	0.0386413	0.0471899	0.0664545	0.0475705	0.0504009	0.0570733		1.11443	0.983201	student's t-test	0.242838		1.01812	0.209957	student's t-test	0.920852
	89	PC(18:1)(20:0)	C46H90O8N1P1	813.625	DEA-SFC/MS/MS	[M + CH3COO]‒	[Acyl FA ‒ H]‒	874.65 > 281.25	874.65 > 311.3		7.44±0.09	84511	193395	277431	311040	73936	338192	21298	91323	32715	100782	61541	29565		15:0-18:1 (d7) PC (IS)	0.00180433	0.0049348	0.00666397	0.0076412	0.00162334	0.00875531	0.000506223	0.00233933	0.000929148	0.00242411	0.00167594	0.000730251		1.34445	0.58377	student's t-test	0.590192		1.27965	0.877727	student's t-test	0.659144
	90	PC(18:1)(20:1)	C46H88O8N1P1	807.578	DEA-SFC/MS/MS	[M + CH3COO]‒	[Acyl FA ‒ H]‒	872.65 > 281.25	872.65 > 309.3		7.51±0.09	95873	78078	78818	56820	75936	79219	40717	30414	46584	42615	44641	37272		15:0-18:1 (d7) PC (IS)	0.00204691	0.00199229	0.00189323	0.00139587	0.00166725	0.00205087	0.000967785	0.000779084	0.00132304	0.00102502	0.00121571	0.000920612		0.862039	0.106131	student's t-test	0.234869		1.02978	0.453818	student's t-test	0.874715
	91	PC(18:1)(20:4)	C46H82O8N1P1	843.672	DEA-SFC/MS/MS	[M + CH3COO]‒	[Acyl FA ‒ H]‒	866.6 > 281.25	866.6 > 303.25		7.62±0.09	560515	610175	531222	417832	545706	546634	778422	865468	1114492	788349	739841	892999		15:0-18:1 (d7) PC (IS)	0.0119671	0.0155696	0.0127601	0.0102647	0.0119815	0.0141516	0.018502	0.0221698	0.031653	0.0189621	0.020148	0.0220569		0.903241	0.971443	student's t-test	0.453807		0.845728	0.100549	student's t-test	0.40729
	92	PC(18:1)(22:0)	C48H94O8N1P1	831.578	DEA-SFC/MS/MS	[M + CH3COO]‒	[Acyl FA ‒ H]‒	902.7 > 281.25	902.7 > 339.35		7.44±0.1	197991	428061	679450	751290	146172	891138	22913	186369	59325	221633	166770	53121		15:0-18:1 (d7) PC (IS)	0.00422716	0.0109227	0.0163206	0.0184566	0.00320935	0.0230703	0.000544609	0.00477402	0.00168491	0.00533094	0.00454164	0.00131208		1.42153	0.507157	student's t-test	0.558981		1.597	0.972706	student's t-test	0.473404
	93	PC(18:1)(22:6)	C48H82O8N1P1	871.703	DEA-SFC/MS/MS	[M + CH3COO]‒	[Acyl FA ‒ H]‒	890.6 > 281.25	890.6 > 327.25		7.7±0.09	1791124	1572030	1761938	1411301	1733459	1470023	1200710	1124163	1463498	1193048	1283236	1361744		15:0-18:1 (d7) PC (IS)	0.038241	0.040113	0.0423222	0.0346709	0.0380597	0.0380568	0.0285392	0.0287965	0.0415652	0.0286964	0.0349463	0.0336349		0.918055	0.956389	student's t-test	0.113663		0.983586	0.327525	student's t-test	0.913922
	94	PC(18:1)(24:0)	C50H98O8N1P1	899.734	DEA-SFC/MS/MS	[M + CH3COO]‒	[Acyl FA ‒ H]‒	930.7 > 281.25	930.7 > 367.35		7.4±0.09	390303	954338	1414159	1643528	348169	1835423	113905	443269	171492	542217	335486	179291		15:0-18:1 (d7) PC (IS)	0.00833307	0.0243515	0.0339685	0.0403759	0.00764438	0.0475165	0.00270736	0.0113548	0.00487059	0.0130419	0.00913627	0.00442846		1.43334	0.541231	student's t-test	0.539625		1.40533	0.957565	student's t-test	0.516454
	95	PC(18:1)(26:0)	C52H102O8N1P1	781.562	DEA-SFC/MS/MS	[M + CH3COO]‒	[Acyl FA ‒ H]‒	958.75 > 281.25	958.75 > 395.4		7.39±0.09	17220	45450	52337	56370	18980	72709	6932	17238	n.d.	18550	15206	n.d.		15:0-18:1 (d7) PC (IS)	0.000367652	0.00115973	0.00125715	0.00138482	0.000416724	0.00188233	0.000164764	0.000441568	0	0.000446183	0.000414104	0		1.32298	0.599933	student's t-test	0.591237		1.41884	0.891339	student's t-test	0.683563
	96	PC(18:2)(18:2)	C44H80O8N1P1	813.625	DEA-SFC/MS/MS	[M + CH3COO]‒	[Acyl FA ‒ H]‒	840.6 > 279.25			7.67±0.09	530572	592608	570788	728015	925815	799060	384393	432261	601115	642315	528001	720845		15:0-18:1 (d7) PC (IS)	0.0113279	0.0151214	0.0137105	0.0178849	0.0203272	0.0206865	0.00913647	0.0110728	0.0170724	0.0154496	0.014379	0.0178048		1.46661	0.77459	student's t-test	0.0115407		1.27766	0.30422	student's t-test	0.254281
	97	PC(18:2)(20:0)	C46H88O8N1P1	811.609	DEA-SFC/MS/MS	[M + CH3COO]‒	[Acyl FA ‒ H]‒	872.65 > 279.25	872.65 > 311.3		7.52±0.13	n.d.	58070	36777	53441	42612	147020	n.d.	n.d.	n.d.	n.d.	11489	n.d.		15:0-18:1 (d7) PC (IS)	0	0.00148175	0.000883394	0.00131286	0.000935587	0.00380614	0	0	0	0	0.000312879	0		2.55992	0.371833	student's t-test	0.285381		#DIV/0!	#DIV/0!	#DIV/0!	#DIV/0!
	98	PC(18:2)(20:1)	C46H86O8N1P1	805.562	DEA-SFC/MS/MS	[M + CH3COO]‒	[Acyl FA ‒ H]‒	870.6 > 279.25	870.6 > 309.3		7.58±0.09	117752	112862	122946	80392	118390	101026	32430	30149	56911	41861	29697	52457		15:0-18:1 (d7) PC (IS)	0.00251404	0.00287986	0.0029532	0.00197496	0.00259937	0.00261542	0.000770815	0.000772296	0.00161634	0.00100688	0.000808736	0.00129568		0.861347	0.586486	student's t-test	0.198851		0.984757	0.402635	student's t-test	0.961811
	99	PC(18:2)(20:4)	C46H80O8N1P1	841.656	DEA-SFC/MS/MS	[M + CH3COO]‒	[Acyl FA ‒ H]‒	864.6 > 279.25	864.6 > 303.25		7.7±0.09	329427	319171	347425	299212	354228	334267	426351	533844	636763	544318	476435	508195		15:0-18:1 (d7) PC (IS)	0.00703335	0.00814418	0.00834525	0.00735062	0.00777741	0.0086537	0.0101338	0.0136749	0.0180849	0.0130925	0.0129747	0.0125523		1.01101	0.938444	student's t-test	0.884951		0.921849	0.0101164	Welch's t-test	0.682198
	100	PC(18:2)(22:0)	C48H92O8N1P1	829.562	DEA-SFC/MS/MS	[M + CH3COO]‒	[Acyl FA ‒ H]‒	900.65 > 279.25	900.65 > 339.35			n.d.	n.d.	n.d.	n.d.	n.d.	n.d.	n.d.	n.d.	n.d.	n.d.	n.d.	n.d.		15:0-18:1 (d7) PC (IS)	0	0	0	0	0	0	0	0	0	0	0	0		#DIV/0!	#DIV/0!	#DIV/0!	#DIV/0!		#DIV/0!	#DIV/0!	#DIV/0!	#DIV/0!
	101	PC(18:2)(22:6)	C48H80O8N1P1	869.687	DEA-SFC/MS/MS	[M + CH3COO]‒	[Acyl FA ‒ H]‒	888.6 > 279.25	888.6 > 327.25		7.77±0.09	2756928	2199397	2418386	2290283	2619251	2478149	1446944	1509037	1865140	1930876	1930268	1989156		15:0-18:1 (d7) PC (IS)	0.0588612	0.0561213	0.0580903	0.0562645	0.0575082	0.0641558	0.0343918	0.0386555	0.0529723	0.0464433	0.0525669	0.0491318		1.02806	0.199651	student's t-test	0.564732		1.17555	0.180905	student's t-test	0.278941
	102	PC(18:2)(24:0)	C50H96O8N1P1	861.625	DEA-SFC/MS/MS	[M + CH3COO]‒	[Acyl FA ‒ H]‒	928.7 > 279.25	928.7 > 367.35		7.45±0.09	31718	61864	108529	111423	42052	144052	n.d.	22490	22043	42749	n.d.	n.d.		15:0-18:1 (d7) PC (IS)	0.000677188	0.00157856	0.0026069	0.00273729	0.000923292	0.0037293	0	0.000576103	0.000626049	0.00102824	0	0		1.51972	0.63056	student's t-test	0.443947		0.855333	0.511338	student's t-test	0.891042
	103	PC(20:0)(22:6)	C50H88O8N1P1	835.609	DEA-SFC/MS/MS	[M + CH3COO]‒	[Acyl FA ‒ H]‒	920.65 > 311.3	920.65 > 327.25		7.61±0.09	41070	35115	42426	24833	26391	19986	n.d.	n.d.	n.d.	n.d.	5963	5863		15:0-18:1 (d7) PC (IS)	0.000876855	0.000896018	0.00101908	0.000610063	0.00057944	0.000517409	0	0	0	0	0.00016239	0.000144815		0.611367	0.54448	student's t-test	0.00228333		#DIV/0!	#DIV/0!	#DIV/0!	#DIV/0!
	104	PC(20:1)(20:4)	C48H86O8N1P1	859.609	DEA-SFC/MS/MS	[M + CH3COO]‒	[Acyl FA ‒ H]‒	894.6 > 309.3	894.6 > 303.25		7.6±0.09	37309	34362	36704	29219	20241	24326	19357	29153	43771	23847	18981	18665		15:0-18:1 (d7) PC (IS)	0.000796557	0.000876804	0.00088164	0.000717812	0.00044441	0.000629766	0.000460088	0.000746783	0.00124315	0.000573592	0.000516908	0.000461022		0.701365	0.209899	student's t-test	0.040483		0.633268	0.0395682	Welch's t-test	0.319988
	105	PC(20:1)(22:6)	C50H86O8N1P1	829.562	DEA-SFC/MS/MS	[M + CH3COO]‒	[Acyl FA ‒ H]‒	918.6 > 309.3	918.6 > 327.25		7.68±0.09	100813	60219	88131	65047	66231	47939	12500	12159	17231	9395	16708	12637		15:0-18:1 (d7) PC (IS)	0.00215238	0.00153659	0.00211693	0.00159798	0.00145416	0.00124107	0.000297107	0.000311465	0.000489382	0.000225978	0.000455008	0.000312132		0.739458	0.424882	student's t-test	0.0884605		0.904516	0.923148	student's t-test	0.720562
	106	PC(20:4)(20:4)	C48H80O8N1P1	853.562	DEA-SFC/MS/MS	[M + CH3COO]‒	[Acyl FA ‒ H]‒	888.6 > 303.25			7.74±0.1	17377	8584	9943	13384	n.d.	10480	16525	28239	30635	26810	25143	16493		15:0-18:1 (d7) PC (IS)	0.000371004	0.000219035	0.000238834	0.000328799	0	0.000271312	0.000392776	0.00072337	0.000870073	0.000644861	0.000684718	0.000407374		0.72401	0.362469	student's t-test	0.533509		0.874502	0.546699	student's t-test	0.642179
	107	PC(20:4)(22:6)	C50H80O8N1P1	877.562	DEA-SFC/MS/MS	[M + CH3COO]‒	[Acyl FA ‒ H]‒	912.6 > 303.25	912.6 > 327.25		7.79±0.09	120107	110110	108914	73168	108708	87252	92014	64309	141790	99377	99092	102583		15:0-18:1 (d7) PC (IS)	0.00256432	0.00280964	0.00261614	0.00179749	0.00238679	0.00225883	0.00218704	0.00164734	0.00402702	0.00239031	0.00269857	0.00253378		0.806386	0.296432	student's t-test	0.0564285		0.969632	0.0301096	Welch's t-test	0.922441
	108	PC(22:6)(22:6)	C52H80O8N1P1	877.562	DEA-SFC/MS/MS	[M + CH3COO]‒	[Acyl FA ‒ H]‒	936.6 > 327.25			7.88±0.1	54584	53547	64258	42143	51468	41799	35922	35573	56309	29008	39029	24863		15:0-18:1 (d7) PC (IS)	0.00116538	0.00136634	0.0015435	0.00103531	0.00113003	0.00108212	0.000853815	0.000911237	0.00159925	0.000697729	0.00106287	0.000614112		0.796879	0.117952	student's t-test	0.0704015		0.705857	0.497382	student's t-test	0.298479
	109	PE(16:0)(16:0)	C37H74O8N1P1	691.515	DEA-SFC/MS/MS	[M ‒ H]‒	[Acyl FA ‒ H]‒	690.5 > 255.25			8.73±0.12	424917	402076	289044	206677	255838	268328	285834	202971	251559	199197	187598	191283		15:0-18:1 (d7) PE (IS)	0.0415229	0.0470445	0.032207	0.0249748	0.0288362	0.0297753	0.0298978	0.0254869	0.030583	0.0247657	0.021818	0.0222586		0.692087	0.206438	student's t-test	0.0534673		0.800794	0.496808	student's t-test	0.036247
	110	PE(16:0)(18:0)	C39H78O8N1P1	719.547	DEA-SFC/MS/MS	[M ‒ H]‒	[Acyl FA ‒ H]‒	718.55 > 255.25	718.55 > 283.25		8.68±0.13	1092103	971591	987063	622468	716331	753263	318534	353899	435242	369576	341746	316176		15:0-18:1 (d7) PE (IS)	0.10672	0.11368	0.109984	0.0752189	0.0807396	0.0835868	0.0333181	0.0444387	0.052914	0.0459485	0.0397457	0.0367918		0.725049	0.802302	student's t-test	0.000674369		0.937363	0.368865	student's t-test	0.686509
	111	PE(16:0)(18:1)	C39H76O8N1P1	717.531	DEA-SFC/MS/MS	[M ‒ H]‒	[Acyl FA ‒ H]‒	716.5 > 255.25	716.5 > 281.25		8.76±0.13	4310970	4916322	5636714	5508690	3042392	6130204	2491207	3416903	2784555	3218887	2746169	2354526		15:0-18:1 (d7) PE (IS)	0.421268	0.57523	0.628076	0.665669	0.342916	0.680246	0.260576	0.429057	0.338529	0.400197	0.319384	0.273984		1.03955	0.481956	student's t-test	0.873632		0.966351	0.730031	student's t-test	0.859464
	112	PE(16:0)(18:2)	C39H74O8N1P1	715.515	DEA-SFC/MS/MS	[M ‒ H]‒	[Acyl FA ‒ H]‒	714.5 > 255.25	714.5 > 279.25		8.86±0.13	3901791	3246998	2740599	2704516	3176196	3244045	2528595	2464545	2509904	2637916	2544568	2666664		15:0-18:1 (d7) PE (IS)	0.381283	0.379912	0.305374	0.326813	0.357998	0.359979	0.264487	0.30947	0.305138	0.327966	0.295938	0.310306		0.979581	0.309995	student's t-test	0.803314		1.06269	0.589479	student's t-test	0.342161
	113	PE(16:0)(20:1)	C41H80O8N1P1	745.562	DEA-SFC/MS/MS	[M ‒ H]‒	[Acyl FA ‒ H]‒	744.55 > 255.25	744.55 > 309.3		8.72±0.13	157542	155002	159435	109565	114983	121064	111939	131708	150649	141413	94050	124840		15:0-18:1 (d7) PE (IS)	0.015395	0.0181359	0.0177652	0.0132398	0.0129601	0.013434	0.0117086	0.0165384	0.018315	0.0175816	0.0109382	0.014527		0.772649	0.0500618	student's t-test	0.011067		0.924503	0.972284	student's t-test	0.692327
	114	PE(16:0)(20:4)	C41H74O8N1P1	739.515	DEA-SFC/MS/MS	[M ‒ H]‒	[Acyl FA ‒ H]‒	738.5 > 255.25	738.5 > 303.25		8.89±0.13	2093965	1803162	1527649	1263675	1435599	1545346	2532844	2412006	2156119	2297508	2398232	2199148		15:0-18:1 (d7) PE (IS)	0.204622	0.210977	0.17022	0.152702	0.16181	0.171481	0.264931	0.302873	0.262127	0.285644	0.278919	0.255904		0.829597	0.309958	student's t-test	0.0730729		0.988594	0.639103	student's t-test	0.852637
	115	PE(16:0)(22:6)	C43H74O8N1P1	763.515	DEA-SFC/MS/MS	[M ‒ H]‒	[Acyl FA ‒ H]‒	762.5 > 255.25	762.5 > 327.25		9.01±0.13	18841265	15732196	14186518	11740716	13061512	12281113	22430032	19604733	18924740	19359079	19194796	18960346		15:0-18:1 (d7) PE (IS)	1.84117	1.84073	1.58075	1.41875	1.4722	1.36279	2.34614	2.46175	2.30075	2.40687	2.23239	2.20632		0.808288	0.23419	student's t-test	0.0219004		0.962994	0.733773	student's t-test	0.329899
	116	PE(18:0)(18:1)	C41H80O8N1P1	745.562	DEA-SFC/MS/MS	[M ‒ H]‒	[Acyl FA ‒ H]‒	744.55 > 283.25	744.55 > 281.25		8.7±0.13	4656324	5983860	6517804	6326717	3395145	7431552	2034400	3230625	2234406	3129583	2593259	1956485		15:0-18:1 (d7) PE (IS)	0.455016	0.700136	0.726253	0.764519	0.382676	0.824651	0.212795	0.405666	0.271645	0.389094	0.301601	0.227666		1.04807	0.560785	student's t-test	0.862386		1.03174	0.801195	student's t-test	0.904499
	117	PE(18:0)(18:2)	C41H78O8N1P1	743.547	DEA-SFC/MS/MS	[M ‒ H]‒	[Acyl FA ‒ H]‒	742.55 > 283.25	742.55 > 279.25		8.8±0.13	10768742	9198048	8354317	8775259	9984514	10143009	5079540	5692265	6458920	7374759	5798486	6437179		15:0-18:1 (d7) PE (IS)	1.05232	1.07621	0.930888	1.0604	1.12538	1.12553	0.531312	0.714772	0.785235	0.916887	0.674374	0.749061		1.08233	0.377049	student's t-test	0.168023		1.15212	0.946109	student's t-test	0.379108
	118	PE(18:0)(20:1)	C43H84O8N1P1	773.593	DEA-SFC/MS/MS	[M ‒ H]‒	[Acyl FA ‒ H]‒	772.6 > 283.25	772.6 > 309.3		8.67±0.15	255167	240926	247107	954917	150390	165112	92263	100122	117926	99918	88284	79920		15:0-18:1 (d7) PE (IS)	0.0249349	0.0281893	0.0275341	0.115392	0.0169509	0.0183219	0.00965056	0.0125722	0.0143367	0.0124226	0.0102676	0.00929988		1.86794	0.0018582	Welch's t-test	0.548309		0.875014	0.626534	student's t-test	0.40791
	119	PE(18:0)(20:4)	C43H78O8N1P1	767.547	DEA-SFC/MS/MS	[M ‒ H]‒	[Acyl FA ‒ H]‒	766.55 > 283.25	766.55 > 303.25		8.83±0.13	15828038	14633675	12701444	11177712	12516285	12539209	10408650	10488252	10656041	11494863	10122334	10068059		15:0-18:1 (d7) PE (IS)	1.54672	1.7122	1.41527	1.35071	1.41075	1.39143	1.08873	1.317	1.29549	1.42913	1.17725	1.17157		0.888473	0.0813907	student's t-test	0.118636		1.02073	0.846793	student's t-test	0.83034
	120	PE(18:0)(22:6)	C45H78O8N1P1	791.547	DEA-SFC/MS/MS	[M ‒ H]‒	[Acyl FA ‒ H]‒	790.55 > 283.25	790.55 > 327.25		8.95±0.14	65281861	59941862	57526870	51680950	52391216	51151098	41521910	39611425	42883623	43825055	43086983	40225554		15:0-18:1 (d7) PE (IS)	6.37934	7.01344	6.40999	6.24512	5.90516	5.67604	4.34312	4.97397	5.21352	5.44867	5.01109	4.68084		0.900193	0.781368	student's t-test	0.0674121		1.04198	0.846485	student's t-test	0.583956
	121	PE(18:1)(18:1)	C41H78O8N1P1	743.547	DEA-SFC/MS/MS	[M ‒ H]‒	[Acyl FA ‒ H]‒	742.55 > 281.25			8.78±0.13	2714913	4307493	5025618	5515054	1992510	6225335	1358576	2830680	1646820	2584535	2024900	1314694		15:0-18:1 (d7) PE (IS)	0.265301	0.503994	0.559984	0.666438	0.224581	0.690802	0.142105	0.355446	0.20021	0.321329	0.235499	0.152984		1.18998	0.524681	student's t-test	0.658124		1.01727	0.736174	student's t-test	0.962405
	122	PE(18:1)(18:2)	C41H76O8N1P1	741.531	DEA-SFC/MS/MS	[M ‒ H]‒	[Acyl FA ‒ H]‒	740.5 > 281.25	740.5 > 279.25		8.89±0.13	3295278	3247626	2748179	3133806	3358696	3756294	1728146	1908295	2108512	2158449	1929555	2148360		15:0-18:1 (d7) PE (IS)	0.322015	0.379986	0.306218	0.378688	0.378568	0.416822	0.180761	0.239623	0.25634	0.268355	0.224411	0.249994		1.16451	0.487504	student's t-test	0.0986451		1.09758	0.472209	student's t-test	0.4485
	123	PE(18:1)(20:0)	C43H84O8N1P1	773.593	DEA-SFC/MS/MS	[M ‒ H]‒	[Acyl FA ‒ H]‒	772.6 > 281.25	772.6 > 311.3		8.66±0.14	93076	142123	182169	212425	49370	239713	n.d.	69470	n.d.	71656	49149	22105		15:0-18:1 (d7) PE (IS)	0.00909539	0.016629	0.0202984	0.0256694	0.00556463	0.0266	0	0.00872328	0	0.00890883	0.00571612	0.00257225		1.25664	0.375211	student's t-test	0.632334		1.97141	0.567078	student's t-test	0.457126
	124	PE(18:1)(20:1)	C43H82O8N1P1	771.578	DEA-SFC/MS/MS	[M ‒ H]‒	[Acyl FA ‒ H]‒	770.55 > 281.25	770.55 > 309.3		8.75±0.14	218915	277589	308207	230527	171283	268887	110416	161129	164643	140847	104971	104503		15:0-18:1 (d7) PE (IS)	0.0213924	0.032479	0.0343423	0.0278568	0.0193058	0.0298374	0.0115493	0.0202328	0.0200163	0.0175112	0.0122083	0.0121605		0.87288	0.779838	student's t-test	0.510078		0.808519	0.556696	student's t-test	0.381553
	125	PE(18:1)(20:4)	C43H76O8N1P1	765.531	DEA-SFC/MS/MS	[M ‒ H]‒	[Acyl FA ‒ H]‒	764.5 > 281.25	764.5 > 303.25		8.93±0.13	1419797	1431493	1313986	1317761	1196014	1477850	1578710	1645287	1501757	1786136	1590342	1559391		15:0-18:1 (d7) PE (IS)	0.138743	0.167491	0.146412	0.159238	0.134806	0.163991	0.16513	0.206597	0.182574	0.222066	0.18496	0.181458		1.01191	0.949396	student's t-test	0.892436		1.06167	0.922451	student's t-test	0.554791
	126	PE(18:1)(22:0)	C45H88O8N1P1	801.625	DEA-SFC/MS/MS	[M ‒ H]‒	[Acyl FA ‒ H]‒	800.6 > 281.25	800.6 > 339.35		8.61±0.15	123341	267430	397013	446232	85537	495911	36222	133046	44123	139982	74206	43328		15:0-18:1 (d7) PE (IS)	0.0120529	0.0312904	0.0442376	0.0539226	0.00964111	0.0550294	0.00378876	0.0167065	0.0053642	0.0174036	0.00863029	0.00504186		1.3541	0.562416	student's t-test	0.589164		1.20172	0.897656	student's t-test	0.766912
	127	PE(18:1)(22:6)	C45H76O8N1P1	789.531	DEA-SFC/MS/MS	[M ‒ H]‒	[Acyl FA ‒ H]‒	788.5 > 281.25	788.5 > 327.25		9.05±0.14	17473288	14206685	14065361	11994256	12599470	11902871	13592173	12135213	13404789	13232702	12396621	12369361		15:0-18:1 (d7) PE (IS)	1.70749	1.66224	1.56725	1.44938	1.42012	1.32082	1.42172	1.52381	1.62967	1.64519	1.44175	1.43936		0.848763	0.939768	student's t-test	0.0118285		0.989313	0.872919	student's t-test	0.866372
	128	PE(18:1)(24:0)	C47H92O8N1P1	829.656	DEA-SFC/MS/MS	[M ‒ H]‒	[Acyl FA ‒ H]‒	828.65 > 281.25	828.65 > 367.35		8.57±0.15	303276	592243	842123	894517	228677	951383	89184	254706	122194	292210	227662	112757		15:0-18:1 (d7) PE (IS)	0.0296361	0.0692949	0.0938344	0.108093	0.0257748	0.105571	0.0093285	0.0319832	0.0148556	0.0363298	0.0264775	0.013121		1.24213	0.64756	student's t-test	0.660649		1.35182	0.986058	student's t-test	0.529428
	129	PE(18:2)(18:2)	C41H74O8N1P1	739.515	DEA-SFC/MS/MS	[M ‒ H]‒	[Acyl FA ‒ H]‒	738.5 > 279.25			9±0.13	720481	595476	579444	749362	840534	873166	483737	554153	632930	707246	541468	676770		15:0-18:1 (d7) PE (IS)	0.0704054	0.0696731	0.0645651	0.0905527	0.0947389	0.0968919	0.0505981	0.0695844	0.0769477	0.0879303	0.0629737	0.0787522		1.3789	0.986938	student's t-test	0.00058791		1.165	0.925924	student's t-test	0.368679
	130	PE(18:2)(20:0)	C43H82O8N1P1	771.578	DEA-SFC/MS/MS	[M ‒ H]‒	[Acyl FA ‒ H]‒	770.55 > 279.25	770.55 > 311.3		8.74±0.14	57017	55723	75424	n.d.	42666	52496	17259	23806	27829	27020	14569	25161		15:0-18:1 (d7) PE (IS)	0.0055717	0.00651982	0.00840419	0	0.004809	0.00582528	0.00180526	0.0029893	0.00338328	0.00335933	0.0016944	0.00292786		0.518854	0.353507	student's t-test	0.172214		0.976003	0.9493	student's t-test	0.928853
	131	PE(18:2)(20:1)	C43H80O8N1P1	769.562	DEA-SFC/MS/MS	[M ‒ H]‒	[Acyl FA ‒ H]‒	768.55 > 279.25	768.55 > 309.3		8.86±0.13	236760	200793	248320	181521	183020	225496	126886	128179	169941	121111	127481	119422		15:0-18:1 (d7) PE (IS)	0.0231362	0.0234936	0.0276693	0.021935	0.0206287	0.0250224	0.0132721	0.0160953	0.0206604	0.0150575	0.0148263	0.0138965		0.909649	0.889753	student's t-test	0.315788		0.875119	0.0528962	student's t-test	0.393835
	132	PE(18:2)(20:4)	C43H74O8N1P1	763.515	DEA-SFC/MS/MS	[M ‒ H]‒	[Acyl FA ‒ H]‒	762.5 > 279.25	762.5 > 303.25		9.04±0.13	359128	321870	315309	353172	343698	384800	440899	456703	515870	566496	487420	488784		15:0-18:1 (d7) PE (IS)	0.035094	0.0376601	0.0351336	0.0426772	0.0387391	0.0426998	0.0461173	0.0573477	0.0627162	0.0704311	0.0566878	0.0568773		1.15042	0.587324	student's t-test	0.0259729		1.1072	0.927971	student's t-test	0.42422
	133	PE(18:2)(22:6)	C45H74O8N1P1	787.515	DEA-SFC/MS/MS	[M ‒ H]‒	[Acyl FA ‒ H]‒	786.5 > 279.25	786.5 > 327.25		9.15±0.14	6611384	5168930	6055700	5427846	6240861	6063037	6097340	5938072	7753740	7273798	6902407	6956004		15:0-18:1 (d7) PE (IS)	0.646064	0.604786	0.674762	0.6559	0.703425	0.672792	0.637772	0.745638	0.942651	0.904335	0.802762	0.809434		1.05531	0.638578	student's t-test	0.222694		1.08189	0.237976	student's t-test	0.540895
	134	PE(20:0)(20:4)	C45H82O8N1P1	795.578	DEA-SFC/MS/MS	[M ‒ H]‒	[Acyl FA ‒ H]‒	794.55 > 311.3	794.55 > 303.25		8.77±0.14	108477	83292	88801	77554	73502	69599	29937	24114	n.d.	38488	26797	24579		15:0-18:1 (d7) PE (IS)	0.0106004	0.0097455	0.00989474	0.00937161	0.00828461	0.00772314	0.00313136	0.00302797	0	0.00478512	0.00311654	0.00286013		0.839248	0.457798	student's t-test	0.0423576		1.74723	0.513348	student's t-test	0.267228
	135	PE(20:0)(22:6)	C47H82O8N1P1	819.578	DEA-SFC/MS/MS	[M ‒ H]‒	[Acyl FA ‒ H]‒	818.55 > 311.3	818.55 > 327.25		8.89±0.14	232190	192377	205641	145057	157362	142738	79324	63812	81062	89526	70847	80394		15:0-18:1 (d7) PE (IS)	0.0226896	0.0225089	0.0229137	0.0175287	0.0177367	0.0158391	0.00829716	0.00801281	0.00985501	0.0111306	0.00823963	0.00935504		0.750298	0.0731727	student's t-test	0.000755987		1.09785	0.632677	student's t-test	0.44904
	136	PE(20:1)(20:4)	C45H80O8N1P1	793.562	DEA-SFC/MS/MS	[M ‒ H]‒	[Acyl FA ‒ H]‒	792.55 > 309.3	792.55 > 303.25		8.89±0.14	128163	122875	121362	87618	81079	101340	98036	93005	104805	106172	93943	84676		15:0-18:1 (d7) PE (IS)	0.0125241	0.0143769	0.0135229	0.0105877	0.00913864	0.0112453	0.0102544	0.0116785	0.0127415	0.0132001	0.0109257	0.00985331		0.766174	0.850728	student's t-test	0.0184901		0.979947	0.695545	student's t-test	0.858778
	137	PE(20:1)(22:6)	C47H80O8N1P1	817.562	DEA-SFC/MS/MS	[M ‒ H]‒	[Acyl FA ‒ H]‒	816.55 > 309.3	816.55 > 327.25		9.01±0.14	758025	590585	687977	534874	503078	512118	458317	450639	565504	436336	398651	406080		15:0-18:1 (d7) PE (IS)	0.0740742	0.0691009	0.0766585	0.0646341	0.0567033	0.0568278	0.0479392	0.0565863	0.0687504	0.0542487	0.0463638	0.0472534		0.810455	0.833698	student's t-test	0.0155581		0.853355	0.291491	student's t-test	0.264411
	138	PE(20:4)(20:4)	C45H74O8N1P1	787.515	DEA-SFC/MS/MS	[M ‒ H]‒	[Acyl FA ‒ H]‒	786.5 > 303.25			9.09±0.14	11860	13524	9282	7135	6728	8513	18951	13575	22374	20826	21713	20961		15:0-18:1 (d7) PE (IS)	0.00115896	0.00158236	0.00103426	0.000862192	0.000758331	0.000944656	0.00198224	0.0017046	0.00272009	0.00258925	0.00252526	0.00243912		0.679414	0.191048	student's t-test	0.0817352		1.17898	0.0403746	Welch's t-test	0.333869
	139	PE(20:4)(22:0)	C47H86O8N1P1	823.609	DEA-SFC/MS/MS	[M ‒ H]‒	[Acyl FA ‒ H]‒	822.6 > 303.25	822.6 > 339.35		8.7±0.24	n.d.	n.d.	n.d.	n.d.	n.d.	16247	n.d.	n.d.	n.d.	n.d.	n.d.	n.d.		15:0-18:1 (d7) PE (IS)	0	0	0	0	0	0.00180287	0	0	0	0	0	0		#DIV/0!	#DIV/0!	#DIV/0!	#DIV/0!		#DIV/0!	#DIV/0!	#DIV/0!	#DIV/0!
	140	PE(20:4)(22:6)	C47H74O8N1P1	811.515	DEA-SFC/MS/MS	[M ‒ H]‒	[Acyl FA ‒ H]‒	810.5 > 303.25	810.5 > 327.25		9.2±0.15	185847	136463	157922	134749	195194	155739	365128	357495	423418	359614	439761	331482		15:0-18:1 (d7) PE (IS)	0.018161	0.0159667	0.0175966	0.016283	0.0220009	0.0172818	0.0381918	0.0448903	0.0514765	0.04471	0.051145	0.0385729		1.07427	0.244382	student's t-test	0.533601		0.999028	0.945005	student's t-test	0.993809
	141	PG(16:0)(16:0)	C38H75O10P1	722.51	DEA-SFC/MS/MS	[M ‒ H]‒	[Acyl FA ‒ H]‒	721.5 > 255.25			12.49±0.25	456259	328781	336993	205124	261290	n.d.	936014	895381	732258	561610	628342	638006		15:0-18:1 (d7) PG (IS)	0.00951606	0.00775536	0.00749984	0.00562953	0.00638587	0	0.0216591	0.0223168	0.0201905	0.0149977	0.0171644	0.0169718		0.485054	0.180146	student's t-test	0.114349		0.765727	0.903558	student's t-test	0.00585174
	142	PG(16:0)(18:0)	C40H79O10P1	750.541	DEA-SFC/MS/MS	[M ‒ H]‒	[Acyl FA ‒ H]‒	749.55 > 255.25	749.55 > 283.25		12.54±0.25	366050	208535	270736	100468	197397	176342	283618	304959	269472	243109	232446	246716		15:0-18:1 (d7) PG (IS)	0.00763459	0.00491897	0.00602528	0.0027573	0.00482434	0.00419114	0.00656284	0.0076009	0.00743012	0.00649219	0.00634972	0.00656297		0.633666	0.751148	student's t-test	0.0853611		0.898629	0.0733651	student's t-test	0.0897585
	143	PG(16:0)(18:1)	C40H77O10P1	748.525	DEA-SFC/MS/MS	[M ‒ H]‒	[Acyl FA ‒ H]‒	747.5 > 255.25	747.5 > 281.25		12.51±0.25	12367470	9804385	9803328	6019510	7459943	7277752	9520694	9466608	8569928	7989867	7856132	7863528		15:0-18:1 (d7) PG (IS)	0.257945	0.231268	0.218175	0.165203	0.182319	0.172971	0.220306	0.235949	0.236298	0.213368	0.214606	0.20918		0.735796	0.303376	student's t-test	0.0080238		0.920008	0.176698	student's t-test	0.0287394
	144	PG(16:0)(18:2)	C40H75O10P1	746.51	DEA-SFC/MS/MS	[M ‒ H]‒	[Acyl FA ‒ H]‒	745.5 > 255.25	745.5 > 279.25		12.64±0.25	1371791	1145397	1025614	884353	1128569	1091073	1235074	1464814	1349377	1310047	1221454	1288684		15:0-18:1 (d7) PG (IS)	0.028611	0.0270179	0.0228252	0.0242706	0.027582	0.0259317	0.0285793	0.0365095	0.0372062	0.0349846	0.0333664	0.0342807		0.991462	0.469657	student's t-test	0.915328		1.00329	0.0557336	student's t-test	0.970012
	145	PG(16:0)(20:1)	C42H81O10P1	776.557	DEA-SFC/MS/MS	[M ‒ H]‒	[Acyl FA ‒ H]‒	775.55 > 255.25	775.55 > 309.3			n.d.	n.d.	n.d.	n.d.	n.d.	n.d.	n.d.	n.d.	n.d.	n.d.	n.d.	n.d.		15:0-18:1 (d7) PG (IS)	0	0	0	0	0	0	0	0	0	0	0	0		#DIV/0!	#DIV/0!	#DIV/0!	#DIV/0!		#DIV/0!	#DIV/0!	#DIV/0!	#DIV/0!
	146	PG(16:0)(22:6)	C44H75O10P1	794.51	DEA-SFC/MS/MS	[M ‒ H]‒	[Acyl FA ‒ H]‒	793.5 > 255.25	793.5 > 327.25			n.d.	n.d.	n.d.	n.d.	n.d.	n.d.	n.d.	n.d.	n.d.	n.d.	n.d.	n.d.		15:0-18:1 (d7) PG (IS)	0	0	0	0	0	0	0	0	0	0	0	0		#DIV/0!	#DIV/0!	#DIV/0!	#DIV/0!		#DIV/0!	#DIV/0!	#DIV/0!	#DIV/0!
	147	PG(18:0)(18:1)	C42H81O10P1	776.557	DEA-SFC/MS/MS	[M ‒ H]‒	[Acyl FA ‒ H]‒	775.55 > 283.25	775.55 > 281.25		12.42±0.25	418086	335603	309911	239390	292711	333264	343473	295602	336050	339386	309306	308351		15:0-18:1 (d7) PG (IS)	0.00871989	0.00791628	0.00689712	0.00656994	0.00715379	0.00792072	0.00794787	0.00736768	0.00926586	0.00906325	0.0084493	0.00820254		0.919738	0.709649	student's t-test	0.391922		1.04612	0.343859	student's t-test	0.573418
	148	PG(18:0)(18:2)	C42H79O10P1	774.541	DEA-SFC/MS/MS	[M ‒ H]‒	[Acyl FA ‒ H]‒	773.55 > 283.25	773.55 > 279.25		12.52±0.25	495019	360386	344479	346756	478181	453135	280383	271350	335731	351822	283546	334506		15:0-18:1 (d7) PG (IS)	0.0103245	0.00850087	0.00766644	0.00951655	0.0116866	0.0107697	0.00648799	0.00676322	0.00925707	0.00939536	0.00774561	0.0088983		1.2069	0.782149	student's t-test	0.14344		1.15688	0.470683	student's t-test	0.307467
	149	PG(18:0)(22:6)	C46H79O10P1	822.541	DEA-SFC/MS/MS	[M ‒ H]‒	[Acyl FA ‒ H]‒	821.55 > 283.25	821.55 > 327.25		12.63±0.34	183727	136324	147860	n.d.	150931	130376	18708	17688	64879	74605	84324	78514		15:0-18:1 (d7) PG (IS)	0.00383194	0.00321564	0.00329065	0	0.00368872	0.00309866	0.000432898	0.000440861	0.0017889	0.00199232	0.00230347	0.00208858		0.656532	0.0559886	student's t-test	0.365374		2.39774	0.0799666	student's t-test	0.0542587
	150	PG(18:1)(18:1)	C42H79O10P1	774.541	DEA-SFC/MS/MS	[M ‒ H]‒	[Acyl FA ‒ H]‒	773.55 > 281.25			12.52±0.27	248757	182349	207627	136159	136771	154221	189100	190870	203902	112038	134128	84159		15:0-18:1 (d7) PG (IS)	0.00518825	0.00430129	0.00462077	0.00373682	0.00334265	0.00366539	0.00437572	0.00475731	0.00562216	0.00299196	0.00366397	0.00223874		0.76149	0.358716	student's t-test	0.017272		0.602816	0.890309	student's t-test	0.0241247
	151	PG(18:1)(18:2)	C42H77O10P1	772.525	DEA-SFC/MS/MS	[M ‒ H]‒	[Acyl FA ‒ H]‒	771.5 > 281.25	771.5 > 279.25		12.66±0.25	311281	272649	232877	184327	191775	237649	214143	259727	296266	163635	194111	259640		15:0-18:1 (d7) PG (IS)	0.00649229	0.00643131	0.00518272	0.00505877	0.00468694	0.00564823	0.00495521	0.00647352	0.0081689	0.00436985	0.00530252	0.00690676		0.850197	0.601519	student's t-test	0.151136		0.845976	0.77831	student's t-test	0.444582
	152	PG(18:1)(20:4)	C44H77O10P1	796.525	DEA-SFC/MS/MS	[M ‒ H]‒	[Acyl FA ‒ H]‒	795.5 > 281.25	795.5 > 303.25			n.d.	n.d.	n.d.	n.d.	n.d.	n.d.	n.d.	n.d.	n.d.	n.d.	n.d.	n.d.		15:0-18:1 (d7) PG (IS)	0	0	0	0	0	0	0	0	0	0	0	0		#DIV/0!	#DIV/0!	#DIV/0!	#DIV/0!		#DIV/0!	#DIV/0!	#DIV/0!	#DIV/0!
	153	PG(18:1)(22:6)	C46H77O10P1	820.525	DEA-SFC/MS/MS	[M ‒ H]‒	[Acyl FA ‒ H]‒	819.5 > 281.25	819.5 > 327.25		12.53±0.25	91461	95776	83838	55631	68815	56103	85832	82038	74826	63415	72198	53513		15:0-18:1 (d7) PG (IS)	0.00190757	0.00225919	0.00186583	0.00152677	0.00168182	0.00133341	0.00198613	0.00204474	0.00206317	0.00169349	0.00197223	0.00142352		0.75291	0.789861	student's t-test	0.0362824		0.835117	0.0420904	Welch's t-test	0.16626
	154	PG(18:2)(18:2)	C42H75O10P1	770.51	DEA-SFC/MS/MS	[M ‒ H]‒	[Acyl FA ‒ H]‒	769.5 > 279.25			12.8±0.25	61824	49371	51004	43985	54795	54196	48470	57913	55725	54158	41577	60508		15:0-18:1 (d7) PG (IS)	0.00128944	0.00116457	0.0011351	0.00120715	0.00133918	0.00128808	0.00112158	0.00144344	0.0015365	0.00144628	0.00113576	0.00160959		1.06834	0.795298	student's t-test	0.250892		1.02197	0.899991	student's t-test	0.880421
	155	PG(18:2)(20:4)	C44H75O10P1	794.51	DEA-SFC/MS/MS	[M ‒ H]‒	[Acyl FA ‒ H]‒	793.5 > 279.25	793.5 > 303.25		12.53±0.25	17856	13731	n.d.	n.d.	n.d.	n.d.	n.d.	n.d.	n.d.	n.d.	n.d.	n.d.		15:0-18:1 (d7) PG (IS)	0.000372417	0.00032389	0	0	0	0	0	0	0	0	0	0		0	#DIV/0!	#DIV/0!	#DIV/0!		#DIV/0!	#DIV/0!	#DIV/0!	#DIV/0!
	156	PG(18:2)(22:6)	C46H75O10P1	818.51	DEA-SFC/MS/MS	[M ‒ H]‒	[Acyl FA ‒ H]‒	817.5 > 279.25	817.5 > 327.25		12.68±0.25	105552	n.d.	88749	n.d.	83583	n.d.	59832	50060	n.d.	64023	n.d.	n.d.		15:0-18:1 (d7) PG (IS)	0.00220147	0	0.00197512	0	0.00204275	0	0.0013845	0.00124771	0	0.00170973	0	0		0.489095	0.973569	student's t-test	0.506496		0.64954	0.74793	student's t-test	0.691423
	157	PG(20:4)(22:6)	C48H75O10P1	842.51	DEA-SFC/MS/MS	[M ‒ H]‒	[Acyl FA ‒ H]‒	841.5 > 303.25	841.5 > 327.25		12.66±0.22	n.d.	n.d.	n.d.	n.d.	n.d.	n.d.	n.d.	n.d.	n.d.	n.d.	n.d.	n.d.		15:0-18:1 (d7) PG (IS)	0	0	0	0	0	0	0	0	0	0	0	0		#DIV/0!	#DIV/0!	#DIV/0!	#DIV/0!		#DIV/0!	#DIV/0!	#DIV/0!	#DIV/0!
	158	PG(22:6)(22:6)	C50H75O10P1	866.51	DEA-SFC/MS/MS	[M ‒ H]‒	[Acyl FA ‒ H]‒	865.5 > 327.25			12.93±0.26	17997	32378	32776	20943	22980	24683	18220	21487	21963	16657	17134	14481		15:0-18:1 (d7) PG (IS)	0.000375358	0.00076374	0.000729435	0.000574771	0.000561626	0.000586644	0.000421606	0.000535549	0.000605583	0.000444823	0.000468049	0.000385214		0.922135	0.00675204	Welch's t-test	0.73392		0.830648	0.349479	student's t-test	0.209273
	159	PI(16:0)(16:0)	C41H79O13P1	810.526	DEA-SFC/MS/MS	[M ‒ H]‒	[Acyl FA ‒ H]‒	809.5 > 255.25			16.89±0.26	248043	182945	174913	98337	143080	136675	292593	265305	229152	247392	246892	219265		15:0-18:1 (d7) PI (IS)	0.0582116	0.0503465	0.0446061	0.0333552	0.0324082	0.0311318	0.0613418	0.0526583	0.0544888	0.0618721	0.0592637	0.0493838		0.632623	0.0519813	student's t-test	0.00934953		1.01205	0.651232	student's t-test	0.890864
	160	PI(16:0)(18:0)	C43H83O13P1	838.557	DEA-SFC/MS/MS	[M ‒ H]‒	[Acyl FA ‒ H]‒	837.55 > 255.25	837.55 > 283.25		16.63±0.1	3018832	2451308	2787563	1341239	1597052	1536329	1528336	1720973	1772718	1491122	1418331	1429601		15:0-18:1 (d7) PI (IS)	0.70847	0.6746	0.710881	0.454938	0.361739	0.349944	0.320414	0.341582	0.421525	0.372926	0.340455	0.321981		0.557139	0.221278	student's t-test	0.000928543		0.955553	0.379139	student's t-test	0.663233
	161	PI(16:0)(18:1)	C43H81O13P1	836.541	DEA-SFC/MS/MS	[M ‒ H]‒	[Acyl FA ‒ H]‒	835.55 > 255.25	835.55 > 281.25		16.69±0.11	912973	740569	676388	426339	552976	577445	1033454	1145889	1194239	839359	911629	858440		15:0-18:1 (d7) PI (IS)	0.21426	0.203805	0.172492	0.144611	0.125251	0.13153	0.216662	0.227438	0.283971	0.209922	0.218826	0.193341		0.679686	0.342324	student's t-test	0.0102247		0.854434	0.226917	student's t-test	0.186256
	162	PI(16:0)(18:2)	C43H79O13P1	834.526	DEA-SFC/MS/MS	[M ‒ H]‒	[Acyl FA ‒ H]‒	833.5 > 255.25	833.5 > 279.25		16.8±0.1	337888	309047	292326	192841	269033	261282	299184	321977	285458	297947	317814	304794		15:0-18:1 (d7) PI (IS)	0.0792967	0.0850498	0.0745486	0.0654102	0.0609371	0.0595147	0.0627236	0.0639066	0.0678775	0.0745158	0.0762877	0.068647		0.778007	0.509991	student's t-test	0.00735568		1.12824	0.626077	student's t-test	0.0405576
	163	PI(16:0)(20:4)	C45H79O13P1	858.526	DEA-SFC/MS/MS	[M ‒ H]‒	[Acyl FA ‒ H]‒	857.5 > 255.25	857.5 > 303.25		16.83±0.1	617993	595205	480796	315244	446752	503126	754401	722152	554385	685494	663658	559947		15:0-18:1 (d7) PI (IS)	0.145033	0.1638	0.122612	0.106928	0.101191	0.114602	0.158159	0.143334	0.131824	0.17144	0.159304	0.126114		0.748001	0.192446	student's t-test	0.0443896		1.05433	0.48092	student's t-test	0.640241
	164	PI(16:0)(22:6)	C47H79O13P1	882.526	DEA-SFC/MS/MS	[M ‒ H]‒	[Acyl FA ‒ H]‒	881.5 > 255.25	881.5 > 327.25		16.94±0.1	275094	196557	222884	166463	192135	223636	784271	584634	520868	569861	678917	597771		15:0-18:1 (d7) PI (IS)	0.06456	0.0540925	0.0568396	0.056463	0.0435194	0.0509397	0.164422	0.116039	0.123854	0.142521	0.162967	0.134633		0.859993	0.822288	student's t-test	0.169045		1.08856	0.481391	student's t-test	0.526146
	165	PI(18:0)(18:1)	C45H85O13P1	864.573	DEA-SFC/MS/MS	[M ‒ H]‒	[Acyl FA ‒ H]‒	863.55 > 283.25	863.55 > 281.25		16.57±0.12	855833	915212	935652	627181	683439	689157	598602	741789	637439	614123	621142	549214		15:0-18:1 (d7) PI (IS)	0.20085	0.251866	0.238609	0.212735	0.154802	0.156976	0.125496	0.147232	0.151573	0.153591	0.149098	0.123696		0.758706	0.787727	student's t-test	0.084473		1.00491	0.857957	student's t-test	0.957723
	166	PI(18:0)(18:2)	C45H83O13P1	862.557	DEA-SFC/MS/MS	[M ‒ H]‒	[Acyl FA ‒ H]‒	861.55 > 283.25	861.55 > 279.25		16.66±0.11	5364522	4971333	4857810	3658740	5522186	4748971	1481372	1745713	1759139	1749497	1687657	1708920		15:0-18:1 (d7) PI (IS)	1.25896	1.36811	1.23883	1.24102	1.2508	1.08172	0.310568	0.346493	0.418296	0.437545	0.405103	0.38489		0.924371	0.698784	student's t-test	0.224763		1.14152	0.379944	student's t-test	0.222842
	167	PI(18:0)(20:4)	C47H83O13P1	886.557	DEA-SFC/MS/MS	[M ‒ H]‒	[Acyl FA ‒ H]‒	885.55 > 283.25	885.55 > 303.25		16.7±0.11	15563429	14481270	14146632	9657877	13844838	13196161	21623720	22583591	23667818	22641471	22405809	21302640		15:0-18:1 (d7) PI (IS)	3.65248	3.98525	3.60766	3.27588	3.13591	3.00582	4.53339	4.48244	5.62784	5.66258	5.37827	4.79787		0.837464	0.600104	student's t-test	0.012849		1.08161	0.633758	student's t-test	0.427942
	168	PI(18:0)(22:6)	C49H83O13P1	910.557	DEA-SFC/MS/MS	[M ‒ H]‒	[Acyl FA ‒ H]‒	909.55 > 283.25	909.55 > 327.25		16.8±0.11	5472606	4299181	4862670	3563567	5104425	4518198	8183675	7539490	8436172	7443549	8339755	7752002		15:0-18:1 (d7) PI (IS)	1.28433	1.18313	1.24007	1.20873	1.15617	1.02915	1.7157	1.49645	2.00599	1.86161	2.00187	1.74594		0.915449	0.463781	student's t-test	0.160926		1.07498	0.401824	student's t-test	0.473682
	169	PI(18:1)(18:1)	C45H83O13P1	862.557	DEA-SFC/MS/MS	[M ‒ H]‒	[Acyl FA ‒ H]‒	861.55 > 281.25			16.66±0.11	136770	115258	98102	66662	91712	103881	152378	145680	163777	118212	121079	125814		15:0-18:1 (d7) PI (IS)	0.0320976	0.031719	0.0250179	0.0226112	0.0207731	0.023662	0.0319459	0.0289149	0.0389436	0.0295645	0.0290637	0.0283364		0.754733	0.237552	student's t-test	0.0413492		0.87135	0.028422	Welch's t-test	0.285466
	170	PI(18:1)(18:2)	C45H81O13P1	860.541	DEA-SFC/MS/MS	[M ‒ H]‒	[Acyl FA ‒ H]‒	859.55 > 281.25	859.55 > 279.25		16.78±0.1	499996	437426	365301	292286	441938	430965	230890	300315	330013	282695	267084	319532		15:0-18:1 (d7) PI (IS)	0.117341	0.12038	0.0931586	0.0991412	0.100101	0.098165	0.0484058	0.0596071	0.0784719	0.0707013	0.0641106	0.0719663		0.898839	0.00838574	Welch's t-test	0.324357		1.10882	0.143091	student's t-test	0.498763
	171	PI(18:1)(20:4)	C47H81O13P1	884.541	DEA-SFC/MS/MS	[M ‒ H]‒	[Acyl FA ‒ H]‒	883.55 > 281.25	883.55 > 303.25		16.82±0.11	829799	698349	609789	404780	635614	621170	1237106	1236707	1323433	1155804	1240873	1173049		15:0-18:1 (d7) PI (IS)	0.19474	0.192186	0.155508	0.137298	0.143969	0.14149	0.259358	0.245464	0.314692	0.289064	0.297858	0.264199		0.779372	0.0461057	Welch's t-test	0.08456		1.03857	0.370299	student's t-test	0.676159
	172	PI(18:1)(22:6)	C49H81O13P1	908.541	DEA-SFC/MS/MS	[M ‒ H]‒	[Acyl FA ‒ H]‒	907.55 > 281.25	907.55 > 327.25		16.93±0.11	203890	156299	173856	104098	162913	149675	364324	354645	432970	315137	368611	365252		15:0-18:1 (d7) PI (IS)	0.0478496	0.0430135	0.0443365	0.0353092	0.0369005	0.0340929	0.0763801	0.0703907	0.102954	0.078815	0.088481	0.0822636		0.786264	0.481792	student's t-test	0.00435092		0.99934	0.147951	student's t-test	0.99604
	173	PI(18:2)(18:2)	C45H79O13P1	858.526	DEA-SFC/MS/MS	[M ‒ H]‒	[Acyl FA ‒ H]‒	857.5 > 279.25			16.93±0.1	39068	34398	30823	29609	44525	53361	26005	38872	30936	35935	29319	34885		15:0-18:1 (d7) PI (IS)	0.00916861	0.00946633	0.00786044	0.0100431	0.0100851	0.0121545	0.00545192	0.00771539	0.0073561	0.00898726	0.0070377	0.00785695		1.21843	0.667442	student's t-test	0.0867286		1.16364	0.786107	student's t-test	0.282132
	174	PI(18:2)(20:4)	C47H79O13P1	882.526	DEA-SFC/MS/MS	[M ‒ H]‒	[Acyl FA ‒ H]‒	881.5 > 279.25	881.5 > 303.25		16.97±0.11	31087	25507	21634	n.d.	n.d.	30836	64972	59999	72854	74031	71288	77556		15:0-18:1 (d7) PI (IS)	0.0072956	0.00701953	0.00551708	0	0	0.00702381	0.0136213	0.0119087	0.0173235	0.018515	0.0171119	0.0174675		0.354162	0.105539	student's t-test	0.150594		1.23897	0.129894	student's t-test	0.107748
	175	PI(20:0)(20:4)	C49H87O13P1	914.588	DEA-SFC/MS/MS	[M ‒ H]‒	[Acyl FA ‒ H]‒	913.6 > 311.3	913.6 > 303.25		16.59±0.11	n.d.	n.d.	n.d.	n.d.	n.d.	19132	n.d.	n.d.	n.d.	n.d.	n.d.	n.d.		15:0-18:1 (d7) PI (IS)	0	0	0	0	0	0.00435788	0	0	0	0	0	0		#DIV/0!	#DIV/0!	#DIV/0!	#DIV/0!		#DIV/0!	#DIV/0!	#DIV/0!	#DIV/0!
	176	PS(16:0)(20:4)	C42H74O10N1P1	783.505	DEA-SFC/MS/MS	[M ‒ H]‒	[Acyl FA ‒ H]‒	782.5 > 255.25	782.5 > 303.25		17.13±0.15	n.d.	n.d.	n.d.	n.d.	n.d.	n.d.	n.d.	n.d.	n.d.	n.d.	n.d.	n.d.		15:0-18:1 (d7) PS (IS)	0	0	0	0	0	0	0	0	0	0	0	0		#DIV/0!	#DIV/0!	#DIV/0!	#DIV/0!		#DIV/0!	#DIV/0!	#DIV/0!	#DIV/0!
	177	PS(16:0)(22:6)	C44H74O10N1P1	807.505	DEA-SFC/MS/MS	[M ‒ H]‒	[Acyl FA ‒ H]‒	806.5 > 255.25	806.5 > 327.25		17.28±0.16	n.d.	n.d.	n.d.	n.d.	n.d.	n.d.	n.d.	n.d.	n.d.	n.d.	n.d.	n.d.		15:0-18:1 (d7) PS (IS)	0	0	0	0	0	0	0	0	0	0	0	0		#DIV/0!	#DIV/0!	#DIV/0!	#DIV/0!		#DIV/0!	#DIV/0!	#DIV/0!	#DIV/0!
	178	PS(18:0)(18:1)	C42H80O10N1P1	789.552	DEA-SFC/MS/MS	[M ‒ H]‒	[Acyl FA ‒ H]‒	788.55 > 283.25	788.55 > 281.25		16.82±0.16	2155365	4021717	5256681	5378556	1821928	7128528	1502249	2783638	1354067	2811587	2339169	1745345		15:0-18:1 (d7) PS (IS)	3.09066	6.05452	9.42564	10.6304	2.70151	9.37261	2.00476	3.27468	2.21459	3.7243	3.55854	2.33441		1.22259	0.712399	student's t-test	0.676434		1.28332	0.891431	student's t-test	0.295586
	179	PS(18:0)(18:2)	C42H78O10N1P1	787.536	DEA-SFC/MS/MS	[M ‒ H]‒	[Acyl FA ‒ H]‒	786.55 > 283.25	786.55 > 279.25		16.95±0.16	486581	446698	533305	451219	546440	729313	275733	388841	308046	382413	328801	297294		15:0-18:1 (d7) PS (IS)	0.697727	0.672485	0.956258	0.891808	0.810249	0.958903	0.367968	0.457433	0.503812	0.506554	0.500199	0.397633		1.14378	0.366907	student's t-test	0.328808		1.05655	0.878812	student's t-test	0.662442
	180	PS(18:0)(20:4)	C44H78O10N1P1	811.536	DEA-SFC/MS/MS	[M ‒ H]‒	[Acyl FA ‒ H]‒	810.55 > 283.25	810.55 > 303.25		17±0.16	561311	662674	661594	569162	718676	773456	418215	672846	423469	571089	575021	475799		15:0-18:1 (d7) PS (IS)	0.804885	0.997627	1.18629	1.12492	1.06564	1.01694	0.558111	0.791537	0.692588	0.756479	0.87477	0.636384		1.07317	0.148824	student's t-test	0.558778		1.11037	0.982814	student's t-test	0.479699
	181	PS(18:0)(22:6)	C46H78O10N1P1	835.536	DEA-SFC/MS/MS	[M ‒ H]‒	[Acyl FA ‒ H]‒	834.55 > 283.25	834.55 > 327.25		17.12±0.16	6357914	6194206	6124734	4402059	6369868	6332929	8506681	7957842	8023200	9022930	8482666	7299404		15:0-18:1 (d7) PS (IS)	9.11686	9.32511	10.9821	8.70041	9.4451	8.32656	11.3522	9.36162	13.122	11.952	12.9045	9.763		0.899673	0.473706	student's t-test	0.218926		1.02316	0.846018	student's t-test	0.863931
	182	PS(18:1)(18:1)	C42H78O10N1P1	787.536	DEA-SFC/MS/MS	[M ‒ H]‒	[Acyl FA ‒ H]‒	786.55 > 281.25			16.95±0.16	272816	494888	753961	700876	213214	1073731	159704	403298	170376	383402	301342	178533		15:0-18:1 (d7) PS (IS)	0.391201	0.745033	1.35191	1.38524	0.316149	1.41175	0.213126	0.47444	0.278652	0.507864	0.458426	0.238789		1.25119	0.753347	student's t-test	0.672187		1.24721	0.947972	student's t-test	0.523444
	183	PS(18:1)(20:0)	C44H84O10N1P1	817.583	DEA-SFC/MS/MS	[M ‒ H]‒	[Acyl FA ‒ H]‒	816.6 > 281.25	816.6 > 311.3		16.73±0.17	n.d.	223985	344260	405676	105021	430019	n.d.	128732	n.d.	127917	100479	39518		15:0-18:1 (d7) PS (IS)	0	0.3372	0.617285	0.801795	0.155723	0.56539	0	0.151441	0	0.169442	0.152857	0.0528556		1.59553	0.944059	student's t-test	0.506122		2.47724	0.684516	student's t-test	0.297026
	184	PS(18:1)(24:0)	C48H92O10N1P1	873.646	DEA-SFC/MS/MS	[M ‒ H]‒	[Acyl FA ‒ H]‒	872.65 > 281.25	872.65 > 367.35		16.46±0.17	447083	756749	1413050	1633872	377669	1982379	191691	514807	173294	706389	465504	248103		15:0-18:1 (d7) PS (IS)	0.64109	1.13925	2.53371	3.22925	0.559999	2.60644	0.255813	0.60562	0.283424	0.935701	0.708163	0.331839		1.48252	0.660893	student's t-test	0.520135		1.72572	0.578198	student's t-test	0.255433
	185	SM(d18:1)(16:0)	C39H79O6N2P1	702.568	DEA-SFC/MS/MS	[M + H]+	[C5H15O4NP]+	703.55 > 184.05			8.16±0.06	51796476	54942487	46345402	44567779	53240200	67558714	35183938	36826644	38039245	45050316	39250784	38489214		18:1 (d9) SM (IS)	0.412977	0.467337	0.35514	0.363694	0.40041	0.47731	0.233386	0.262542	0.267919	0.292295	0.263914	0.235238		1.00482	0.967175	student's t-test	0.968025		1.03613	0.595707	student's t-test	0.664121
	186	SM(d18:1)(18:0)	C41H83O6N2P1	730.599	DEA-SFC/MS/MS	[M + H]+	[C5H15O4NP]+	731.6 > 184.05			8.12±0.06	27340475	27648514	36853966	32491646	29996840	44753714	87159943	84136821	93886691	96155315	92511269	91998438		18:1 (d9) SM (IS)	0.217988	0.235176	0.282408	0.265147	0.225601	0.31619	0.578159	0.599823	0.661265	0.623874	0.622027	0.562275		1.09702	0.700843	student's t-test	0.505185		0.983107	0.795724	student's t-test	0.762952
	187	SM(d18:1)(18:1)	C41H81O6N2P1	728.583	DEA-SFC/MS/MS	[M + H]+	[C5H15O4NP]+	729.6 > 184.05			8.19±0.06	1314138	1411691	1453291	1392295	1383127	2002647	2885223	2902886	3044212	3160717	2826232	3042717		18:1 (d9) SM (IS)	0.0104777	0.0120077	0.0111364	0.0113618	0.0104022	0.0141489	0.0191386	0.0206951	0.0214411	0.0205073	0.019003	0.0185964		1.06814	0.269151	student's t-test	0.561548		0.9483	0.846744	student's t-test	0.302589
	188	SM(d18:1)(18:2)	C41H79O6N2P1	726.568	DEA-SFC/MS/MS	[M + H]+	[C5H15O4NP]+	727.55 > 184.05			8.25±0.09	111779	103083	91070	82092	112770	78535	185368	142704	115943	129984	163287	150805		18:1 (d9) SM (IS)	0.000891222	0.000876817	0.00069786	0.000669909	0.000848122	0.000554859	0.0012296	0.00101736	0.000816613	0.000843361	0.00109791	0.000921688		0.840623	0.694065	student's t-test	0.282457		0.934516	0.569911	student's t-test	0.660054
	189	SM(d18:1)(20:0)	C43H87O6N2P1	758.63	DEA-SFC/MS/MS	[M + H]+	[C5H15O4NP]+	759.65 > 184.05			8.06±0.11	6986132	9461758	10983529	13017510	7109263	16265132	5464179	7503365	5907104	9768242	7733662	6002307		18:1 (d9) SM (IS)	0.055701	0.080481	0.0841656	0.106229	0.0534674	0.114915	0.0362456	0.0534925	0.0416051	0.0633782	0.0519996	0.0366848		1.24627	0.35622	student's t-test	0.44118		1.15775	0.60554	student's t-test	0.497285
	190	SM(d18:1)(20:1)	C43H85O6N2P1	756.615	DEA-SFC/MS/MS	[M + H]+	[C5H15O4NP]+	757.6 > 184.05			8.15±0.07	772314	927728	933455	1092681	811492	1212727	569217	763336	710034	911231	728107	672367		18:1 (d9) SM (IS)	0.00615772	0.00789119	0.00715297	0.00891679	0.00610308	0.00856806	0.00377579	0.00544192	0.00500093	0.00591224	0.00489564	0.00410936		1.11254	0.486774	student's t-test	0.478302		1.04913	0.954058	student's t-test	0.763089
	191	SM(d18:1)(22:0)	C45H91O6N2P1	786.661	DEA-SFC/MS/MS	[M + H]+	[C5H15O4NP]+	787.65 > 184.05			8.04±0.07	19831139	23530404	29181854	30419477	20780091	40777100	8624876	13005094	9809187	15928957	13001292	10261803		18:1 (d9) SM (IS)	0.158115	0.200148	0.223617	0.248237	0.156283	0.288095	0.0572115	0.0927151	0.0690884	0.10335	0.087418	0.062718		1.19031	0.388408	student's t-test	0.443722		1.15739	0.875943	student's t-test	0.506518
	192	SM(d18:1)(22:6)	C45H79O6N2P1	774.568	DEA-SFC/MS/MS	[M + H]+	[C5H15O4NP]+	775.55 > 184.05			8.05±0.06	278679	269531	283848	299441	378487	398565	999733	n.d.	324768	n.d.	n.d.	n.d.		18:1 (d9) SM (IS)	0.00222193	0.00229261	0.0021751	0.00244358	0.00284653	0.00281591	0.00663154	0	0.00228742	0	0	0		1.21173	0.130051	student's t-test	0.0243438		0	#DIV/0!	#DIV/0!	#DIV/0!
	193	SM(d18:1)(24:0)	C47H95O6N2P1	814.693	DEA-SFC/MS/MS	[M + H]+	[C5H15O4NP]+	815.7 > 184.05			8.01±0.07	24482687	31500896	40113724	44175157	25371042	57396002	12545828	20205768	14220621	23965640	19569066	14641658		18:1 (d9) SM (IS)	0.195202	0.267944	0.307387	0.36049	0.190811	0.40551	0.0832203	0.14405	0.100159	0.155494	0.131578	0.0894867		1.24175	0.403392	student's t-test	0.443851		1.15005	0.937603	student's t-test	0.569649
	194	SM(d18:1)(26:0)	C49H99O6N2P1	842.724	DEA-SFC/MS/MS	[M + H]+	[C5H15O4NP]+	843.75 > 184.05			7.98±0.07	247347	350967	465853	491284	218658	683110	136310	252828	187574	312393	235800	165876		18:1 (d9) SM (IS)	0.00197212	0.0029853	0.00356978	0.00400911	0.00164449	0.00482625	0.000904186	0.00180244	0.00132113	0.00202687	0.00158547	0.0010138		1.22899	0.386209	student's t-test	0.573106		1.14856	0.878431	student's t-test	0.637324
	195	SM(d18:1)(28:0)	C51H103O6N2P1	870.755	DEA-SFC/MS/MS	[M + H]+	[C5H15O4NP]+	871.75 > 184.05			7.72±0.02	n.d.	n.d.	n.d.	n.d.	n.d.	n.d.	n.d.	n.d.	n.d.	n.d.	n.d.	n.d.		18:1 (d9) SM (IS)	0	0	0	0	0	0	0	0	0	0	0	0		#DIV/0!	#DIV/0!	#DIV/0!	#DIV/0!		#DIV/0!	#DIV/0!	#DIV/0!	#DIV/0!
	196	CE(18:1)	C45H78O2	650.6	C18 column-SFC/MS/MS	[M + NH4]+	[M + H ‒ Acyl FA]+	668.65 > 369.35			8.2±0.03	79055	117166	106918	107830	43126	45940	122006	72829	124559	67219	119305	82051		18:1 (d7) CE (IS)	0.0019408	0.00178495	0.000939363	0.0012658	0.00106071	0.000982869	0.000620602	0.000589141	0.00101172	0.000593077	0.000853844	0.000464174		0.709388	0.137053	student's t-test	0.233564		0.860286	0.83114	student's t-test	0.591861
	197	CE(18:2)	C45H76O2	648.585	C18 column-SFC/MS/MS	[M + NH4]+	[M + H ‒ Acyl FA]+	666.6 > 369.35			8.03±0.01	634705	995885	1419944	1154590	596152	640981	2654299	1421608	1643620	1647347	2545935	1640949		18:1 (d7) CE (IS)	0.015582	0.0151716	0.0124754	0.0135535	0.0146627	0.0137135	0.0135015	0.0114999	0.0133502	0.0145346	0.0182208	0.00928307		0.969944	0.224119	student's t-test	0.696841		1.09613	0.115994	student's t-test	0.669435
	198	CE(20:4)	C47H76O2	672.585	C18 column-SFC/MS/MS	[M + NH4]+	[M + H ‒ Acyl FA]+	690.6 > 369.35			8.2±0.01	422447	632579	822335	732489	454978	429412	1497542	876786	1092747	968306	1500122	1044809		18:1 (d7) CE (IS)	0.0103711	0.00963692	0.00722489	0.00859855	0.0111904	0.00918711	0.00761747	0.00709265	0.00887577	0.00854342	0.0107361	0.00591063		1.06401	0.810567	student's t-test	0.661824		1.06802	0.251517	student's t-test	0.738129
	199	CE(22:6)	C49H76O2	696.585	C18 column-SFC/MS/MS	[M + NH4]+	[M + H ‒ Acyl FA]+	714.6 > 369.35			8.47±0.01	177243	345808	509636	384818	187959	213337	827808	515823	614684	486507	796952	604127		18:1 (d7) CE (IS)	0.00435131	0.00526816	0.00447757	0.0045173	0.00462295	0.00456426	0.00421077	0.00417268	0.00499273	0.00429248	0.00570364	0.00341763		0.972156	0.0224377	Welch's t-test	0.693776		1.00281	0.277383	student's t-test	0.986913
	200	TG(16:0)(16:0)(16:0)	C51H98O6	806.736	C18 column-SFC/MS/MS	[M + NH4]+	[M + H ‒ Acyl FA]+	824.75 > 551.5			7.19±0	10457123	10415684	1.19113e+07	1.43914e+07	8.13113e+06	7.59756e+06	1.51565e+07	9.67856e+06	9186690	1.2617e+07	13051746	9387621		15:0-18:1 (d7)-15:0 TG (IS)	0.459795	0.31013	0.146965	0.23467	0.356871	0.32063	0.0683435	0.0904815	0.0796922	0.100894	0.075927	0.051148		0.994853	0.277216	student's t-test	0.987879		0.955774	0.330676	student's t-test	0.833952
	201	TG(16:0)(16:0)(18:1)	C53H100O6	832.752	C18 column-SFC/MS/MS	[M + NH4]+	[M + H ‒ Acyl FA]+	850.8 > 577.5	850.8 > 551.5		7.41±0	38991546	37867879	40567597	41236585	31228271	31089067	47937899	35420443	36007468	39466873	45379475	41312324		15:0-18:1 (d7)-15:0 TG (IS)	1.71444	1.12753	0.500533	0.672415	1.37059	1.31201	0.216161	0.331134	0.312356	0.315603	0.26399	0.225088		1.00374	0.578545	student's t-test	0.992473		0.936057	0.702956	student's t-test	0.699859
	202	TG(16:0)(16:0)(18:2)	C53H98O6	830.736	C18 column-SFC/MS/MS	[M + NH4]+	[M + H ‒ Acyl FA]+	848.75 > 575.5	848.75 > 551.5		7.28±0.01	52810983	51887934	60229958	61961386	49042061	45105105	43429288	45143816	47155866	48148561	49616798	44773071		15:0-18:1 (d7)-15:0 TG (IS)	2.32208	1.54498	0.743132	1.01036	2.15243	1.90351	0.195831	0.422034	0.409065	0.385028	0.28864	0.243944		1.09894	0.733074	student's t-test	0.803766		0.893549	0.487399	student's t-test	0.687928
	203	TG(16:0)(16:0)(20:1)	C55H104O6	860.783	C18 column-SFC/MS/MS	[M + NH4]+	[M + H ‒ Acyl FA]+	878.8 > 605.55	878.8 > 551.5		7.85±0.02	884780	865376	987586	1151240	690093	668277	1604415	776196	1176424	1017107	1114625	1051862		15:0-18:1 (d7)-15:0 TG (IS)	0.0389034	0.0257668	0.0121851	0.0187724	0.0302878	0.0282025	0.00723461	0.00725639	0.0102052	0.00813346	0.0064842	0.00573102		1.0053	0.348365	student's t-test	0.988002		0.823961	0.681669	student's t-test	0.298946
	204	TG(16:0)(16:0)(20:4)	C55H98O6	854.736	C18 column-SFC/MS/MS	[M + NH4]+	[M + H ‒ Acyl FA]+	872.75 > 599.5	872.75 > 551.5		7.41±0	1237040	946947	1212012	1025193	847342	770023	1166428	1355366	1035853	1473631	1523868	1297129		15:0-18:1 (d7)-15:0 TG (IS)	0.0543921	0.0281956	0.0149541	0.0167171	0.0371893	0.0324963	0.00525964	0.0126709	0.00898576	0.0117841	0.00886493	0.00706734		0.885802	0.444226	student's t-test	0.791496		1.02973	0.584257	student's t-test	0.921514
	205	TG(16:0)(16:0)(22:6)	C57H98O6	878.736	C18 column-SFC/MS/MS	[M + NH4]+	[M + H ‒ Acyl FA]+	896.75 > 623.5	896.75 > 551.5		7.58±0.01	1523883	1580454	2031876	1756978	1328256	1481403	1826732	1806071	1786609	2093091	2246973	2083528		15:0-18:1 (d7)-15:0 TG (IS)	0.0670045	0.0470585	0.0250698	0.0286498	0.0582964	0.0625178	0.00823708	0.0168843	0.0154984	0.0167377	0.0130715	0.011352		1.07425	0.872731	student's t-test	0.841387		1.01333	0.51942	student's t-test	0.956595
	206	TG(16:0)(18:0)(18:0)	C55H106O6	862.799	C18 column-SFC/MS/MS	[M + NH4]+	[M + H ‒ Acyl FA]+	880.85 > 607.55	880.85 > 579.55		7.86±0.01	427605	396051	462902	650690	393811	382310	594086	414300	462495	425760	582955	459824		15:0-18:1 (d7)-15:0 TG (IS)	0.0188016	0.0117925	0.0057114	0.0106103	0.0172841	0.0161342	0.00267885	0.00387315	0.00401202	0.00340466	0.00339127	0.00250533		1.21272	0.457558	student's t-test	0.582187		0.880466	0.661785	student's t-test	0.461491
	207	TG(16:0)(18:0)(18:1)	C55H104O6	860.783	C18 column-SFC/MS/MS	[M + NH4]+	[M + H ‒ Acyl FA]+	878.8 > 605.55	878.8 > 577.5	878.8 > 579.55	7.64±0	3984099	3818459	3862076	3963843	3449145	3439751	3875429	3072094	3363603	3512934	3705738	3566674		15:0-18:1 (d7)-15:0 TG (IS)	0.175179	0.113696	0.0476512	0.0646355	0.151381	0.145164	0.017475	0.02872	0.0291784	0.0280918	0.0215577	0.0194329		1.07326	0.730655	student's t-test	0.867521		0.916534	0.633393	student's t-test	0.674065
	208	TG(16:0)(18:0)(18:2)	C55H102O6	858.768	C18 column-SFC/MS/MS	[M + NH4]+	[M + H ‒ Acyl FA]+	876.8 > 603.55	876.8 > 575.5		7.64±0.06	6444251	6366446	5878114	5682812	5876400	5388172	4512395	5596554	5073047	5343140	4959412	4859422		15:0-18:1 (d7)-15:0 TG (IS)	0.283351	0.189563	0.0725256	0.0926655	0.257912	0.22739	0.0203472	0.0523203	0.0440074	0.0427273	0.0288508	0.0264763		1.05964	0.818647	student's t-test	0.897911		0.840407	0.437469	student's t-test	0.597437
	209	TG(16:0)(18:0)(20:1)	C57H108O6	888.815	C18 column-SFC/MS/MS	[M + NH4]+	[M + H ‒ Acyl FA]+	906.85 > 633.6	906.85 > 605.55	906.85 > 579.55	8.09±0.01	273556	300728	322094	399127	264717	253419	334857	291133	370649	257952	310881	325714		15:0-18:1 (d7)-15:0 TG (IS)	0.0120281	0.00895426	0.00397408	0.00650828	0.0116183	0.0106947	0.00150993	0.0027217	0.00321528	0.00206276	0.00180851	0.00177464		1.15486	0.619612	student's t-test	0.671991		0.758153	0.0624021	student's t-test	0.308282
	210	TG(16:0)(18:0)(20:4)	C57H102O6	882.768	C18 column-SFC/MS/MS	[M + NH4]+	[M + H ‒ Acyl FA]+	900.8 > 627.55	900.8 > 599.5		7.81±0.01	146397	166427	181781	150482	110816	149949	203829	192192	148110	249572	257766	262565		15:0-18:1 (d7)-15:0 TG (IS)	0.00643702	0.00495541	0.00224286	0.0024538	0.00486365	0.00632811	0.000919103	0.00179674	0.00128482	0.00199574	0.00149952	0.00143057		1.00075	0.916542	student's t-test	0.99846		1.23126	0.656976	student's t-test	0.376955
	211	TG(16:0)(18:1)(18:1)	C55H102O6	858.768	C18 column-SFC/MS/MS	[M + NH4]+	[M + H ‒ Acyl FA]+	876.8 > 603.55	876.8 > 577.5		7.64±0	756204	79683671	508825	564832	402879	508264	66407226	459733	515750	516269	520448	271225		15:0-18:1 (d7)-15:0 TG (IS)	0.03325	2.3726	0.00627801	0.00921031	0.0176821	0.0214496	0.299443	0.00429789	0.004474	0.00412843	0.00302765	0.00147776		0.0200412	4.25839e-05	Welch's t-test	0.420882		0.0280124	0.000122209	Welch's t-test	0.416794
	212	TG(16:0)(18:1)(18:2)	C55H100O6	856.752	C18 column-SFC/MS/MS	[M + NH4]+	[M + H ‒ Acyl FA]+	874.8 > 601.5	874.8 > 575.5	874.8 > 577.5	7.52±0	133404670	132634128	132388494	130894820	120982543	129667480	104077511	119587168	127250260	119675087	118227127	111865422		15:0-18:1 (d7)-15:0 TG (IS)	5.86575	3.94922	1.63344	2.13441	5.30985	5.47219	0.469305	1.11798	1.10386	0.957002	0.687773	0.609493		1.12823	0.881788	student's t-test	0.779799		0.83766	0.389776	student's t-test	0.574304
	213	TG(16:0)(18:1)(20:0)	C57H108O6	888.815	C18 column-SFC/MS/MS	[M + NH4]+	[M + H ‒ Acyl FA]+	906.85 > 633.6	906.85 > 607.55		8.33±0.03	162289	190782	217698	270119	166056	150344	8865	135866	238604	184293	213955	189666		15:0-18:1 (d7)-15:0 TG (IS)	0.00713578	0.00568059	0.00268601	0.00440464	0.0072881	0.00634478	3.99739e-05	0.00127017	0.00206983	0.00147373	0.00124466	0.00103339		1.16353	0.591435	student's t-test	0.616981		1.11	0.088667	student's t-test	0.847413
	214	TG(16:0)(18:1)(20:1)	C57H106O6	886.799	C18 column-SFC/MS/MS	[M + NH4]+	[M + H ‒ Acyl FA]+	904.85 > 631.55	904.85 > 605.55	904.85 > 577.5	8.09±0.01	3121886	3255128	3383934	3966535	2823132	2545834	3286545	2655605	3804222	2853841	2941021	3235747		15:0-18:1 (d7)-15:0 TG (IS)	0.137268	0.0969223	0.0417518	0.0646794	0.123906	0.107439	0.0148196	0.0248264	0.0330006	0.0228212	0.0171091	0.0176298		1.07277	0.578002	student's t-test	0.848396		0.792329	0.214768	student's t-test	0.417242
	215	TG(16:0)(18:1)(20:4)	C57H100O6	880.752	C18 column-SFC/MS/MS	[M + NH4]+	[M + H ‒ Acyl FA]+	898.8 > 625.5	898.8 > 599.5		7.66±0.02	1474843	1522285	1764115	1582852	1364405	1425418	1647837	1818928	1589452	1825915	2176398	1767116		15:0-18:1 (d7)-15:0 TG (IS)	0.0648482	0.0453265	0.0217661	0.0258104	0.0598829	0.0601551	0.00743041	0.0170045	0.0137881	0.0146012	0.0126609	0.00962805		1.10541	0.911999	student's t-test	0.797272		0.965131	0.41855	student's t-test	0.895099
	216	TG(16:0)(18:1)(22:6)	C59H100O6	904.752	C18 column-SFC/MS/MS	[M + NH4]+	[M + H ‒ Acyl FA]+	922.8 > 649.5	922.8 > 623.5	922.8 > 577.5	7.83±0.01	1065996	60444	1318909	1258595	1019426	1116431	1315756	1252708	1252869	1601999	2067721	2059717		15:0-18:1 (d7)-15:0 TG (IS)	0.0468714	0.00179974	0.016273	0.020523	0.044742	0.0471153	0.00593299	0.0117111	0.0108683	0.0128107	0.0120287	0.0112223		1.73041	0.580513	student's t-test	0.372761		1.26477	0.121618	student's t-test	0.247395
	217	TG(16:0)(18:2)(18:2)	C55H98O6	854.736	C18 column-SFC/MS/MS	[M + NH4]+	[M + H ‒ Acyl FA]+	872.75 > 599.5	872.75 > 575.5		7.41±0	77481683	73875130	72498186	76890134	80736187	73741218	41555794	56576779	67805068	55866327	51370283	48183887		15:0-18:1 (d7)-15:0 TG (IS)	3.40684	2.19965	0.894501	1.25379	3.54346	3.11201	0.187383	0.528917	0.588191	0.446744	0.298841	0.262528		1.21662	0.967809	student's t-test	0.666201		0.772801	0.33811	student's t-test	0.51079
	218	TG(16:0)(18:2)(20:0)	C57H106O6	886.799	C18 column-SFC/MS/MS	[M + NH4]+	[M + H ‒ Acyl FA]+	904.85 > 631.55	904.85 > 607.55	904.85 > 575.5	8.09±0	n.d.	n.d.	n.d.	n.d.	n.d.	n.d.	n.d.	n.d.	n.d.	n.d.	n.d.	n.d.		15:0-18:1 (d7)-15:0 TG (IS)	0	0	0	0	0	0	0	0	0	0	0	0		#DIV/0!	#DIV/0!	#DIV/0!	#DIV/0!		#DIV/0!	#DIV/0!	#DIV/0!	#DIV/0!
	219	TG(16:0)(18:2)(20:1)	C57H104O6	884.783	C18 column-SFC/MS/MS	[M + NH4]+	[M + H ‒ Acyl FA]+	902.8 > 629.55	902.8 > 605.55		7.95±0	4248740	4671544	4869779	4935799	4117447	4177330	3525119	3578807	5559560	4048864	4003111	3804218		15:0-18:1 (d7)-15:0 TG (IS)	0.186815	0.139097	0.0600845	0.0804845	0.180712	0.176291	0.0158954	0.0334571	0.0482278	0.0323774	0.0232876	0.0207271		1.1334	0.878226	student's t-test	0.745489		0.782865	0.250335	student's t-test	0.518643
	220	TG(16:0)(18:2)(20:4)	C57H98O6	878.736	C18 column-SFC/MS/MS	[M + NH4]+	[M + H ‒ Acyl FA]+	896.75 > 623.5	896.75 > 599.5	896.75 > 575.5	7.58±0.01	1615171	1584395	1991729	1634950	1419214	1485305	1840188	2007919	1916016	1971240	2262140	2058768		15:0-18:1 (d7)-15:0 TG (IS)	0.0710184	0.0471758	0.0245744	0.02666	0.0622885	0.0626825	0.00829775	0.0187714	0.0166209	0.0157633	0.0131597	0.0112171		1.06207	0.884696	student's t-test	0.877302		0.918749	0.290675	student's t-test	0.749198
	221	TG(16:0)(18:2)(22:6)	C59H98O6	902.736	C18 column-SFC/MS/MS	[M + NH4]+	[M + H ‒ Acyl FA]+	920.75 > 647.5	920.75 > 623.5		7.72±0.01	482646	564957	687206	552164	517803	538624	477053	595368	655557	634162	833269	774601		15:0-18:1 (d7)-15:0 TG (IS)	0.0212217	0.0168218	0.00847892	0.00900374	0.0227261	0.0227309	0.00215112	0.00556589	0.00568679	0.00507118	0.00484745	0.00422038		1.17063	0.800353	student's t-test	0.677377		1.05485	0.0921065	student's t-test	0.846462
	222	TG(16:0)(20:1)(20:1)	C59H110O6	914.83	C18 column-SFC/MS/MS	[M + NH4]+	[M + H ‒ Acyl FA]+	932.85 > 659.6	932.85 > 605.55		8.56±0.02	184668	161819	174019	290762	165749	146730	228205	129535	306956	143403	212863	229829		15:0-18:1 (d7)-15:0 TG (IS)	0.00811978	0.00481821	0.00214709	0.00474125	0.00727463	0.00619226	0.00102902	0.00121098	0.00266276	0.00114675	0.00123831	0.00125221		1.20703	0.305819	student's t-test	0.608668		0.741881	0.00815793	Welch's t-test	0.500377
	223	TG(16:0)(22:6)(22:6)	C61H104O6	932.783	C18 column-SFC/MS/MS	[M + NH4]+	[M + H ‒ Acyl FA]+	968.75 > 695.5	968.75 > 623.5		8.02±0.02	11687	12090	22166	8060	5239	15717	21360	12896	14910	13701	24987	12493		15:0-18:1 (d7)-15:0 TG (IS)	0.000513873	0.000359983	0.00027349	0.000131429	0.000229937	0.000663285	9.63162e-05	0.00012056	0.00012934	0.000109562	0.000145359	6.80675e-05		0.893062	0.312472	student's t-test	0.829398		0.932909	0.327125	student's t-test	0.767039
	224	TG(18:0)(18:0)(18:1)	C57H108O6	888.815	C18 column-SFC/MS/MS	[M + NH4]+	[M + H ‒ Acyl FA]+	906.85 > 605.55	906.85 > 607.55		8.09±0.02	682872	697414	795607	879405	629805	621628	716631	608281	752245	618387	694032	764795		15:0-18:1 (d7)-15:0 TG (IS)	0.0300256	0.0207657	0.0098164	0.0143398	0.0276418	0.0262338	0.00323142	0.00568661	0.00652553	0.00494503	0.00403745	0.00416695		1.12552	0.685741	student's t-test	0.742628		0.85145	0.151969	student's t-test	0.49834
	225	TG(18:0)(18:0)(18:2)	C57H106O6	886.799	C18 column-SFC/MS/MS	[M + NH4]+	[M + H ‒ Acyl FA]+	904.85 > 603.55	904.85 > 607.55		8.09±0	n.d.	n.d.	n.d.	n.d.	n.d.	n.d.	n.d.	n.d.	n.d.	n.d.	n.d.	n.d.		15:0-18:1 (d7)-15:0 TG (IS)	0	0	0	0	0	0	0	0	0	0	0	0		#DIV/0!	#DIV/0!	#DIV/0!	#DIV/0!		#DIV/0!	#DIV/0!	#DIV/0!	#DIV/0!
	226	TG(18:0)(18:1)(18:1)	C57H106O6	886.799	C18 column-SFC/MS/MS	[M + NH4]+	[M + H ‒ Acyl FA]+	904.85 > 603.55	904.85 > 605.55		8.09±0	4728111	4918511	5303056	5975184	4546609	4674669	4675502	4519325	5128391	4525083	5177951	5011462		15:0-18:1 (d7)-15:0 TG (IS)	0.207893	0.14645	0.0654304	0.097433	0.199548	0.197279	0.0210827	0.0422496	0.0444875	0.0361856	0.0301221	0.0273047		1.17744	0.799495	student's t-test	0.665273		0.86823	0.219802	student's t-test	0.581327
	227	TG(18:0)(18:1)(18:2)	C57H104O6	884.783	C18 column-SFC/MS/MS	[M + NH4]+	[M + H ‒ Acyl FA]+	902.8 > 601.5	902.8 > 603.55	902.8 > 605.55	7.95±0	11232154	11404380	12475019	13002954	10933518	10827455	9176857	9467135	12735938	9812528	10577052	10283369		15:0-18:1 (d7)-15:0 TG (IS)	0.493873	0.339569	0.15392	0.21203	0.479866	0.456938	0.0413802	0.0885051	0.110481	0.0784675	0.0615308	0.0560284		1.16354	0.864083	student's t-test	0.700953		0.815534	0.197762	student's t-test	0.529096
	228	TG(18:0)(18:1)(20:1)	C59H110O6	914.83	C18 column-SFC/MS/MS	[M + NH4]+	[M + H ‒ Acyl FA]+	932.85 > 631.55	932.85 > 633.6		8.56±0.01	137559	146821	235765	204884	153950	149826	246423	164443	273195	98135	172990	181562		15:0-18:1 (d7)-15:0 TG (IS)	0.00604841	0.00437164	0.00290893	0.0033409	0.00675677	0.00632292	0.00111117	0.00153732	0.0023699	0.000784753	0.00100635	0.000989232		1.23195	0.832901	student's t-test	0.504072		0.55403	0.071526	student's t-test	0.118544
	229	TG(18:0)(18:1)(20:4)	C59H104O6	908.783	C18 column-SFC/MS/MS	[M + NH4]+	[M + H ‒ Acyl FA]+	926.8 > 625.5	926.8 > 627.55	926.8 > 605.55	8.07±0.02	142543	176980	212068	186294	139109	173842	286667	224884	164328	240314	413384	315595		15:0-18:1 (d7)-15:0 TG (IS)	0.00626756	0.00526963	0.00261655	0.00303776	0.00610541	0.00733644	0.00129264	0.00210236	0.0014255	0.00192171	0.00240481	0.0017195		1.16433	0.841638	student's t-test	0.668329		1.25423	0.793359	student's t-test	0.274358
	230	TG(18:0)(18:1)(22:6)	C61H104O6	932.783	C18 column-SFC/MS/MS	[M + NH4]+	[M + H ‒ Acyl FA]+	950.8 > 649.5	950.8 > 651.55		8.27±0.02	39098	63655	158999	78605	52754	61407	146001	33784	76173	99268	215295	314221		15:0-18:1 (d7)-15:0 TG (IS)	0.00171912	0.00189535	0.00196177	0.00128176	0.00231534	0.00259148	0.000658346	0.000315835	0.000660781	0.000793813	0.00125245	0.00171202		1.10981	0.0638688	student's t-test	0.640865		2.2987	0.314875	student's t-test	0.070368
	231	TG(18:0)(18:2)(20:1)	C59H108O6	912.815	C18 column-SFC/MS/MS	[M + NH4]+	[M + H ‒ Acyl FA]+	930.85 > 629.55	930.85 > 633.6	930.85 > 603.55	8.41±0.01	214104	310299	356265	395878	235697	241379	288064	198123	379855	273556	339132	309555		15:0-18:1 (d7)-15:0 TG (IS)	0.00941407	0.00923924	0.00439569	0.0064553	0.0103446	0.0101866	0.00129893	0.00185219	0.00329514	0.00218754	0.00197286	0.0016866		1.17083	0.747903	student's t-test	0.561988		0.907036	0.112255	student's t-test	0.76066
	232	TG(18:0)(18:2)(22:6)	C61H102O6	930.768	C18 column-SFC/MS/MS	[M + NH4]+	[M + H ‒ Acyl FA]+	948.8 > 647.5	948.8 > 651.55	948.8 > 603.55	8.14±0.02	42319	49573	95879	104404	48767	36660	53994	38712	49134	77990	115275	120903		15:0-18:1 (d7)-15:0 TG (IS)	0.00186075	0.00147605	0.00118298	0.00170244	0.00214035	0.00154712	0.000243469	0.000361905	0.000426225	0.00062366	0.000670599	0.000658734		1.19252	0.900538	student's t-test	0.334716		1.89317	0.129648	student's t-test	0.00515929
	233	TG(18:1)(18:1)(18:1)	C57H104O6	884.783	C18 column-SFC/MS/MS	[M + NH4]+	[M + H ‒ Acyl FA]+	902.8 > 603.55			7.88±0	4.79304e+07	4.94529e+07	4.67353e+07	4.7715e+07	46823657	4.71686e+07	40612659	4.52939e+07	4.63097e+07	4.55663e+07	45906005	4.51268e+07		15:0-18:1 (d7)-15:0 TG (IS)	2.10748	1.47248	0.576632	0.778055	2.05506	1.9906	0.18313	0.423438	0.401725	0.364379	0.267053	0.245871		1.1605	0.933261	student's t-test	0.733084		0.870087	0.368783	student's t-test	0.63444
	234	TG(18:1)(18:1)(18:2)	C57H102O6	882.768	C18 column-SFC/MS/MS	[M + NH4]+	[M + H ‒ Acyl FA]+	900.8 > 601.5	900.8 > 603.55		7.75±0	105370805	109927318	101411456	101046838	108265323	107700191	69208597	91628017	103586100	93942876	89078773	83107079		15:0-18:1 (d7)-15:0 TG (IS)	4.63311	3.27312	1.25124	1.6477	4.7517	4.54514	0.312075	0.856599	0.898583	0.75123	0.518206	0.452805		1.19515	0.980308	student's t-test	0.693047		0.833104	0.373808	student's t-test	0.612214
	235	TG(18:1)(18:1)(20:0)	C59H110O6	914.83	C18 column-SFC/MS/MS	[M + NH4]+	[M + H ‒ Acyl FA]+	932.85 > 633.6	932.85 > 603.55		8.57±0.01	137324	161280	160487	182287	148712	160251	176632	110588	185764	145012	138206	167283		15:0-18:1 (d7)-15:0 TG (IS)	0.00603808	0.00480216	0.00198013	0.00297242	0.00652688	0.00676287	0.000796467	0.00103385	0.00161145	0.00115961	0.000803998	0.000911433		1.26846	0.979269	student's t-test	0.540415		0.835338	0.318393	student's t-test	0.51369
	236	TG(18:1)(18:1)(20:1)	C59H108O6	912.815	C18 column-SFC/MS/MS	[M + NH4]+	[M + H ‒ Acyl FA]+	930.85 > 631.55	930.85 > 603.55		8.33±0.01	3410691	3664371	3747599	3946803	3458765	590981	3597078	2877954	4397711	2729745	3627832	3329842		15:0-18:1 (d7)-15:0 TG (IS)	0.149967	0.109108	0.0462388	0.0643577	0.151803	0.0249404	0.0162199	0.026905	0.038149	0.0218289	0.0211045	0.0181425		0.789685	0.786132	student's t-test	0.679457		0.751481	0.061495	student's t-test	0.35421
	237	TG(18:1)(18:1)(20:4)	C59H102O6	906.768	C18 column-SFC/MS/MS	[M + NH4]+	[M + H ‒ Acyl FA]+	924.8 > 625.5	924.8 > 603.55		7.92±0.02	1530908	1476971	1552474	1329624	1434950	1520427	1281125	1844709	1568511	1679169	1859028	1797441		15:0-18:1 (d7)-15:0 TG (IS)	0.0673134	0.0439772	0.0191548	0.0216812	0.0629791	0.0641647	0.00577683	0.0172456	0.0136064	0.0134278	0.0108147	0.00979327		1.1409	0.995454	student's t-test	0.771436		0.929206	0.185605	student's t-test	0.819728
	238	TG(18:1)(18:1)(22:6)	C61H102O6	930.768	C18 column-SFC/MS/MS	[M + NH4]+	[M + H ‒ Acyl FA]+	948.8 > 649.5	948.8 > 603.55		8.06±0.01	872430	963830	1498190	1160654	1025583	917267	916128	1060636	997020	1432657	1739567	1906973		15:0-18:1 (d7)-15:0 TG (IS)	0.0383604	0.0286983	0.018485	0.018926	0.0450122	0.0387103	0.00413099	0.00991553	0.00864889	0.0114565	0.0101197	0.0103901		1.19995	0.695521	student's t-test	0.589382		1.40849	0.102515	student's t-test	0.161575
	239	TG(18:1)(18:2)(18:2)	C57H100O6	880.752	C18 column-SFC/MS/MS	[M + NH4]+	[M + H ‒ Acyl FA]+	898.8 > 599.5	898.8 > 601.5		7.64±0.01	89197198	87434833	82507050	87140938	93914220	87468689	50447759	68747039	86509540	66820515	63704538	60551518		15:0-18:1 (d7)-15:0 TG (IS)	3.92196	2.6034	1.01799	1.42094	4.12184	3.69133	0.227478	0.642693	0.750448	0.534341	0.370594	0.329912		1.22414	0.998011	student's t-test	0.659437		0.76196	0.26625	student's t-test	0.494436
	240	TG(18:1)(18:2)(20:0)	C59H108O6	912.815	C18 column-SFC/MS/MS	[M + NH4]+	[M + H ‒ Acyl FA]+	930.85 > 631.55	930.85 > 633.6	930.85 > 601.5	8.33±0	289388	369974	346182	433298	494485	328280	322180	206832	419856	260122	267885	281706		15:0-18:1 (d7)-15:0 TG (IS)	0.0127243	0.0110161	0.00427128	0.00706548	0.0217027	0.013854	0.00145277	0.0019336	0.00364214	0.00208011	0.00155839	0.00153486		1.52159	0.542619	student's t-test	0.381246		0.736053	0.133911	student's t-test	0.419404
	241	TG(18:1)(18:2)(20:1)	C59H106O6	910.799	C18 column-SFC/MS/MS	[M + NH4]+	[M + H ‒ Acyl FA]+	928.85 > 629.55	928.85 > 631.55		8.19±0	4124237	4532681	4658363	5886911	4215565	4680856	3234547	3304252	5767929	3810433	3534381	3894150		15:0-18:1 (d7)-15:0 TG (IS)	0.181341	0.134962	0.057476	0.0959936	0.185019	0.19754	0.0145852	0.0308903	0.0500353	0.0304708	0.0205609	0.0212171		1.28031	0.87817	student's t-test	0.509175		0.756445	0.177747	student's t-test	0.509981
	242	TG(18:1)(18:2)(20:4)	C59H100O6	904.752	C18 column-SFC/MS/MS	[M + NH4]+	[M + H ‒ Acyl FA]+	922.8 > 623.5	922.8 > 625.5	922.8 > 601.5	7.82±0.01	1216008	1432385	1501538	1317476	1389511	1386537	952489	1263359	1348333	1355183	1599542	1514357		15:0-18:1 (d7)-15:0 TG (IS)	0.0534674	0.0426497	0.0185263	0.0214831	0.0609848	0.0585143	0.00429495	0.0118107	0.0116964	0.0108369	0.00930515	0.0082509		1.22975	0.790441	student's t-test	0.62136		1.02125	0.167103	student's t-test	0.943193
	243	TG(18:1)(18:2)(22:6)	C61H100O6	928.752	C18 column-SFC/MS/MS	[M + NH4]+	[M + H ‒ Acyl FA]+	946.8 > 647.5	946.8 > 649.5		7.95±0.01	510547	485137	807184	619883	560340	574945	362926	487561	521997	676541	777698	784754		15:0-18:1 (d7)-15:0 TG (IS)	0.0224485	0.0144451	0.00995924	0.010108	0.024593	0.0242637	0.0016365	0.00455804	0.00452819	0.00541007	0.00452417	0.00427569		1.25851	0.738425	student's t-test	0.538632		1.32522	0.224194	student's t-test	0.321473
	244	TG(18:1)(20:1)(20:1)	C61H112O6	940.846	C18 column-SFC/MS/MS	[M + NH4]+	[M + H ‒ Acyl FA]+	958.9 > 659.6	958.9 > 631.55		8.81±0.01	89886	107778	140688	188292	83617	102792	156444	107808	251624	109653	128558	198399		15:0-18:1 (d7)-15:0 TG (IS)	0.00395225	0.00320912	0.00173584	0.00307034	0.0036699	0.004338	0.000705435	0.00100786	0.00218277	0.000876858	0.000747871	0.00108097		1.24514	0.480251	student's t-test	0.385627		0.694468	0.0885283	student's t-test	0.437833
	245	TG(18:1)(20:1)(20:4)	C61H106O6	934.799	C18 column-SFC/MS/MS	[M + NH4]+	[M + H ‒ Acyl FA]+	952.85 > 653.55	952.85 > 625.5	952.85 > 631.55	8.29±0.04	35456	49308	55210	67664	33847	37878	44347	50380	53598	60059	66500	58433		15:0-18:1 (d7)-15:0 TG (IS)	0.00155899	0.00146816	0.000681195	0.00110335	0.00148552	0.00159852	0.000199969	0.000470986	0.000464949	0.000480272	0.000386856	0.000318369		1.12918	0.448387	student's t-test	0.640324		1.04366	0.432327	student's t-test	0.877829
	246	TG(18:1)(22:6)(22:6)	C63H106O6	958.799	C18 column-SFC/MS/MS	[M + NH4]+	[M + H ‒ Acyl FA]+	994.8 > 695.5	994.8 > 649.5		8.26±0.02	n.d.	n.d.	6846	n.d.	n.d.	n.d.	4831	n.d.	n.d.	9667	8058	11682		15:0-18:1 (d7)-15:0 TG (IS)	0	0	8.44676e-05	0	0	0	2.17839e-05	0	0	7.73038e-05	4.68765e-05	6.36488e-05		0	#DIV/0!	#DIV/0!	#DIV/0!		8.62239	0.810253	student's t-test	0.00832967
	247	TG(18:2)(18:2)(18:2)	C57H98O6	878.736	C18 column-SFC/MS/MS	[M + NH4]+	[M + H ‒ Acyl FA]+	896.75 > 599.5			7.54±0.01	1.52945e+07	15442910	15106654	1.58656e+07	17750602	15539978	7.43586e+06	1.08553e+07	1.54861e+07	1.06688e+07	9.4618e+06	9.22726e+06		15:0-18:1 (d7)-15:0 TG (IS)	0.672494	0.459817	0.18639	0.25871	0.779063	0.655814	0.0335297	0.101483	0.134338	0.0853149	0.0550429	0.0502743		1.28429	0.890792	student's t-test	0.585223		0.707748	0.240423	student's t-test	0.453629
	248	TG(18:2)(18:2)(20:0)	C59H106O6	910.799	C18 column-SFC/MS/MS	[M + NH4]+	[M + H ‒ Acyl FA]+	928.85 > 631.55	928.85 > 599.5		8.2±0	n.d.	n.d.	n.d.	n.d.	n.d.	n.d.	n.d.	n.d.	n.d.	n.d.	n.d.	n.d.		15:0-18:1 (d7)-15:0 TG (IS)	0	0	0	0	0	0	0	0	0	0	0	0		#DIV/0!	#DIV/0!	#DIV/0!	#DIV/0!		#DIV/0!	#DIV/0!	#DIV/0!	#DIV/0!
	249	TG(18:2)(18:2)(20:1)	C59H104O6	908.783	C18 column-SFC/MS/MS	[M + NH4]+	[M + H ‒ Acyl FA]+	926.8 > 629.55	926.8 > 599.5		8.06±0.01	2769691	3106279	3378853	4085423	3218870	2926622	1913052	2370059	3949824	2442190	2365196	2208375		15:0-18:1 (d7)-15:0 TG (IS)	0.121782	0.0924903	0.0416891	0.0666181	0.141274	0.123509	0.00862631	0.0221569	0.0342637	0.0195294	0.0137593	0.0120322		1.29473	0.961644	student's t-test	0.481915		0.696741	0.17136	student's t-test	0.443653
	250	TG(18:2)(18:2)(20:4)	C59H98O6	902.736	C18 column-SFC/MS/MS	[M + NH4]+	[M + H ‒ Acyl FA]+	920.75 > 623.5	920.75 > 599.5		7.71±0.01	731947	832653	780111	716182	840497	843956	442213	779367	799215	804880	805014	687458		15:0-18:1 (d7)-15:0 TG (IS)	0.0321834	0.0247925	0.0096252	0.0116783	0.0368889	0.0356164	0.00199402	0.00728604	0.00693298	0.00643636	0.00468308	0.00374558		1.264	0.792049	student's t-test	0.608165		0.916855	0.351342	student's t-test	0.822975
	251	TG(18:2)(18:2)(22:0)	C61H110O6	938.83	C18 column-SFC/MS/MS	[M + NH4]+	[M + H ‒ Acyl FA]+	956.85 > 659.6	956.85 > 599.5		9.40587	n.d.	n.d.	n.d.	n.d.	n.d.	n.d.	n.d.	n.d.	n.d.	n.d.	n.d.	n.d.		15:0-18:1 (d7)-15:0 TG (IS)	0	0	0	0	0	0	0	0	0	0	0	0		#DIV/0!	#DIV/0!	#DIV/0!	#DIV/0!		#DIV/0!	#DIV/0!	#DIV/0!	#DIV/0!
	252	TG(18:2)(18:2)(22:6)	C61H98O6	926.736	C18 column-SFC/MS/MS	[M + NH4]+	[M + H ‒ Acyl FA]+	944.75 > 647.5	944.75 > 599.5		7.83±0.01	249236	255186	427267	367065	358916	324783	184659	243219	376950	299646	372341	371095		15:0-18:1 (d7)-15:0 TG (IS)	0.0109588	0.00759823	0.00527173	0.00598547	0.0157526	0.0137064	0.000832662	0.00227377	0.00326994	0.00239617	0.00216605	0.00202189		1.48747	0.471067	student's t-test	0.31853		1.03258	0.0463647	Welch's t-test	0.931402
	253	TG(18:2)(20:1)(20:1)	C61H110O6	938.83	C18 column-SFC/MS/MS	[M + NH4]+	[M + H ‒ Acyl FA]+	956.85 > 659.6	956.85 > 629.55		8.66±0.01	158865	181475	239946	264994	157857	151517	195174	122552	283723	147179	201644	191750		15:0-18:1 (d7)-15:0 TG (IS)	0.00698523	0.00540347	0.00296051	0.00432107	0.00692825	0.00639428	0.000880076	0.0011457	0.00246122	0.00117694	0.00117304	0.00104474		1.14948	0.631403	student's t-test	0.61759		0.756569	0.0156641	Welch's t-test	0.534397
	254	TG(18:2)(20:1)(20:4)	C61H104O6	932.783	C18 column-SFC/MS/MS	[M + NH4]+	[M + H ‒ Acyl FA]+	950.8 > 653.55	950.8 > 623.5	950.8 > 629.55	8.15±0.03	33049	40613	70252	60861	26598	29016	34251	42721	45166	52573	55619	78018		15:0-18:1 (d7)-15:0 TG (IS)	0.00145315	0.00120926	0.000866787	0.000992417	0.00116737	0.00122453	0.000154444	0.000399384	0.000391803	0.000420409	0.000323557	0.000425077		0.958946	0.288489	student's t-test	0.805752		1.23626	0.289614	student's t-test	0.440037
	255	TG(18:2)(20:4)(20:4)	C61H98O6	926.736	C18 column-SFC/MS/MS	[M + NH4]+	[M + H ‒ Acyl FA]+	944.75 > 647.5	944.75 > 623.5		7.83±0.01	48228	53202	57231	37483	35868	31032	39494	42542	64893	73366	105891	83512		15:0-18:1 (d7)-15:0 TG (IS)	0.00212057	0.0015841	0.00070613	0.000611208	0.00157423	0.0013096	0.000178086	0.000397711	0.00056293	0.000586683	0.000616009	0.000455011		0.792382	0.653627	student's t-test	0.576309		1.45575	0.329538	student's t-test	0.229068
	256	TG(18:2)(22:6)(22:6)	C65H98O6	974.736	C18 column-SFC/MS/MS	[M + NH4]+	[M + H ‒ Acyl FA]+	992.75 > 695.5	992.75 > 647.5		8.14±0.02	n.d.	n.d.	n.d.	n.d.	n.d.	n.d.	n.d.	n.d.	n.d.	n.d.	n.d.	n.d.		15:0-18:1 (d7)-15:0 TG (IS)	0	0	0	0	0	0	0	0	0	0	0	0		#DIV/0!	#DIV/0!	#DIV/0!	#DIV/0!		#DIV/0!	#DIV/0!	#DIV/0!	#DIV/0!
	257	TG(20:4)(20:4)(20:4)	C71H130O6	1078.99	C18 column-SFC/MS/MS	[M + NH4]+	[M + H ‒ Acyl FA]+	968.75 > 647.5			7.94±0.02	5104.67	5104.33	13032.7	6314	n.d.	4298.67	n.d.	8463	10075.3	6851.67	4835.67	9405.33		15:0-18:1 (d7)-15:0 TG (IS)	0.00022445	0.000151983	0.0001608	0.000102958	0	0.000181411	0	7.91177e-05	8.74009e-05	5.47905e-05	2.81309e-05	5.12445e-05		0.529321	0.317738	student's t-test	0.215084		0.805711	0.165198	student's t-test	0.729582
	258	Cholesterol	C27H46O	386.355	DEA-SFC/MS/MS	[M ‒ OH]+	[C10H10O + H]+	369.4 > 147.1			4.34±0.13	3671980	4466587	5609981	5610741	3952383	6673496	3587146	4627155	3837446	4899988	4462819	3787144		Cholesterol (d7) (IS)	1.25936	1.73592	1.79191	1.89433	1.14217	2.21256	0.928709	1.33907	1.03213	1.41027	1.18068	0.893024		1.09648	0.441734	student's t-test	0.69054		1.05578	0.80822	student's t-test	0.767425
		Cholesterol (d7) (IS)	C27H39O(D7)	393.399	DEA-SFC/MS/MS	[M ‒ OH]+	[C10H10O + H]+	376.4 > 147.1			4.33±0.14	291576	257303	313072	296186	346041	301619	386251	345551	371798	347451	377986	424081
		Cer(d18:1/17:0) (IS)	C35H69N1O3	551.528	DEA-SFC/MS/MS	[M + H]+	[C18H34N]+	552.3 > 264.3			5.57±0.08	8458679	7952807	9001949	8954814	9955282	10495850	11018719	9019024	9604745	9915772	10316510	11104483
		15:0-18:1 (d7) DG (IS)	C36H61(D7)O5	587.551	DEA-SFC/MS/MS	[M + NH4]+	[M + H ‒ Acyl FA]+	605.6 > 299.25	605.6 > 346.35		4.29±0.15	3084921	3312134	4561882	4513864	3816125	4685651	4446876	4662740	4460572	4924478	4757136	4770381
		FA(17:0) (IS)	C17H34O2	270.256	DEA-SFC/MS/MS	[M ‒ H]‒	[M ‒ H]‒	269.1 > 269.1			5.08±0.06	158087	207607	137736	146673	132963	120587	132166	109463	114491	127265	127534	86614
		HexCer(d18:1/12:0) (IS)	C36H69N1O8	643.502	DEA-SFC/MS/MS	[M + H]+	[C18H34N]+	644.3 > 264.3			7.85±0.05	3854724	3711327	3802534	3812458	4558188	4663827	5180328	4737210	4300884	4830413	5133179	5078492
		18:1 (d7) LPC (IS)	C26H45(D7)NO7P	528.392	DEA-SFC/MS/MS	[M + H]+	[C5H15O4NP]+	529.4 > 184.05			8.83±0.05	13431841	14083722	16672140	16246151	16556130	20121283	17984513	17330855	16352530	18818937	18229351	19356603
		18:1 (d7) LPE (IS)	C23H39(D7)NO7P	486.345	DEA-SFC/MS/MS	[M + H]+	[C5H15O4NP]+	487.35 > 346.35			10.73±0.12	246475	234011	254128	228738	247193	264350	276044	256576	243367	252880	261093	256414
		18:1 (d7) MG (IS)	C21H33(D7)O4	363.337	DEA-SFC/MS/MS	[M + H]+	[M + H ‒ H2O]+	364.35 > 346.35			5.13±0.09	21473	23230	26880	33669	23078	28961	38224	24256	36756	39106	36167	29550
		15:0-18:1 (d7) PC (IS)	C41H73(D7)NO8P	752.606	DEA-SFC/MS/MS	[M + CH3COO]‒	[Acyl FA ‒ H]‒	811.6 > 288.3	811.6 > 241.2		7.51±0.08	4683782	3919005	4163149	4070566	4554573	3862706	4207237	3903813	3520969	4157488	3672025	4048610
		15:0-18:1 (d7) PE (IS)	C38H67(D7)NO8P	710.559	DEA-SFC/MS/MS	[M ‒ H]‒	[Acyl FA ‒ H]‒	709.55 > 288.3	709.55 > 241.2		8.77±0.13	1023332	854671	897457	827542	887211	901175	956038	796375	822546	804326	859832	859366
		15:0-18:1 (d7) PG (IS)	C39H67(D7)NaO10P	763.536	DEA-SFC/MS/MS	[M ‒ H]‒	[Acyl FA ‒ H]‒	740.55 > 288.3	740.55 > 241.2		12.83±0.01	4794623	4239402	4493338	3643714	4091692	4207495	4321571	4012145	3626753	3744637	3660730	3759213
		15:0-18:1 (d7) PI (IS)	C42H75(D7)NO13P	846.596	DEA-SFC/MS/MS	[M ‒ H]‒	[Acyl FA ‒ H]‒	828.55 > 288.3	828.55 > 241.2		16.73±0.1	426106	363372	392128	294818	441493	439021	476988	503824	420549	399844	416599	444002
		15:0-18:1 (d7) PS (IS)	C39H66(D7)NNaO10P	776.531	DEA-SFC/MS/MS	[M ‒ H]‒	[Acyl FA ‒ H]‒	753.55 > 288.3	753.55 > 241.2		17.22±0.03	69738	66425	55770	50596	67441	76057	74934	85005	61143	75493	65734	74766
		18:1 (d9) SM (IS)	C41H72(D9)N2O6P	737.64	DEA-SFC/MS/MS	[M + H]+	[C5H15O4NP]+	738.65 > 184.05			8.16±0.07	12542212	11756505	13049903	12254194	13296433	14154043	15075433	14026949	14198033	15412610	14872554	16361825
		18:1 (d7) CE (IS)	C45H71(D7)O2	657.644	C18 column-SFC/MS/MS	[M + NH4]+	[M + H ‒ Acyl FA]+	675.7 > 369.4			8.15±0	4073325	6564119	11381966	8518753	4065781	4674073	19659297	12361903	12311578	11333936	13972686	17676791
		15:0-18:1 (d7)-15:0 TG (IS)	C51H89(D7)O6	811.765	C18 column-SFC/MS/MS	[M + NH4]+	[M + H ‒ Acyl FA]+	829.8 > 523.45	829.8 > 570.55		6.97±0.01	2274299	3358491	8104879	6132606	2278454	2369570	22176944	10696717	11527720	12505212	17189853	18353838

## Sheet: Supplementary Table S8
	Supplementary Table S8. Metabolic profile data of 185 hydrophilic metabolites during the 4-week pair-feeding
		Hydrophilic metabolite	Abbreviation	Molecular formula	Exact mass	KEGG ID	HMDB ID	Method	Adduct ion	RT (min)	Peak area																Relative peak area (Analyte/IS/sample amount, mg)													SOL (CANA/Vehicle)					EDL (CANA/Vehicle)
											Vehicle-treated mice SOL			CANA-treated mice SOL			Vehicle-treated mice EDL			CANA-treated mice EDL				IS			Vehicle-treated mice SOL			CANA-treated mice SOL			Vehicle-treated mice EDL			CANA-treated mice EDL				Fold change	F-test	Welch's or student's t-test	P-value		Fold change	F-test	Welch's or student's t-test	P-value
											1	2	3	1	2	3	1	2	3	1	2	3		Compound	Method	Adduct ion	1	2	3	1	2	3	1	2	3	1	2	3
											Sample amount (mg)
											10	10	10	10	10	10	10	10	10	10	10	10
	1	2-Ketoglutaric acid	2KG	C5H6O5	146.022	C00026	HMDB00208	IC/MS	[M ‒ H]‒	9.44 ±0.02	1.29433e+08	1.97015e+08	1.4082e+08	1.21179e+08	1.12231e+08	7.51449e+07	1.3703e+08	9.61167e+07	1.75116e+08	1.49988e+08	1.23657e+08	8.66102e+07		PIPES (IS)	IC/MS	[M ‒ H]‒	1.14344	0.976838	0.835823	0.946802	0.821733	0.556313	0.677539	0.68287	0.759229	0.731179	0.585991	0.430594		0.786458	0.747132	student's t-test	0.221553		0.824557	0.169228	student's t-test	0.243549
	2	3-Hydroxybutyric acid	3-Hydroxybutyric acid	C4H8O3	104.047	C01089	HMDB00357	IC/MS	[M ‒ H]‒	3.44 ±0.02	4.57157e+06	8.18063e+06	1.61417e+07	2.02882e+07	2.42064e+07	2.23088e+07	2.08688e+07	1.30502e+07	5.14707e+07	8.91604e+07	1.11773e+08	6.33326e+07		PIPES (IS)	IC/MS	[M ‒ H]‒	0.0403862	0.0405611	0.0958073	0.158516	0.177235	0.165157	0.103185	0.0927166	0.223155	0.434651	0.529674	0.314867		2.83391	0.16218	student's t-test	0.00494215		3.05255	0.623862	student's t-test	0.0186682
	3	6-Phosphogluconic acid	6PG	C6H13O10P	276.025	C00345	HMDB01316	IC/MS	[M ‒ H]‒	11.48 ±0.01	2.00723e+06	2.98027e+06	2.05435e+06	1.79736e+06	1.44705e+06	1.47377e+06	4.22592e+06	3.08638e+06	6.40052e+06	6.3191e+06	3.98219e+06	5.12434e+06		PIPES (IS)	IC/MS	[M ‒ H]‒	0.0177323	0.0147767	0.0121934	0.0140432	0.010595	0.0109106	0.0208949	0.0219275	0.0277499	0.0308052	0.018871	0.0254764		0.795233	0.642266	student's t-test	0.191257		1.0649	0.553011	student's t-test	0.725846
	4	Adenosine 5'-diphosphate	ADP	C10H15N5O10P2	427.029	C00008	HMDB01341	IC/MS	[M ‒ H]‒	16.3 ±0.01	3.94614e+08	4.52001e+08	5.44089e+08	4.35612e+08	2.55932e+08	3.58115e+08	5.81328e+08	2.16034e+08	5.3369e+08	4.87451e+08	7.7119e+08	6.40198e+08		PIPES (IS)	IC/MS	[M ‒ H]‒	3.4861	2.24111	3.22938	3.40353	1.87389	2.6512	2.87435	1.53483	2.31385	2.37629	3.65455	3.18283		0.885228	0.849669	student's t-test	0.58783		1.37046	0.960106	student's t-test	0.198091
	5	Adenosine 5'-diphosphate ribose	ADP-Rib	C15H23N5O14P2	559.072	C00301	HMDB01178	IC/MS	[M ‒ H]‒	14.7 ±0.02	4.81193e+07	6.51475e+07	5.68673e+07	5.00778e+07	4.27013e+07	4.45371e+07	9.10869e+07	5.69884e+07	8.75871e+07	7.88099e+07	7.37139e+07	7.44846e+07		PIPES (IS)	IC/MS	[M ‒ H]‒	0.425095	0.323014	0.33753	0.391269	0.312651	0.329718	0.450375	0.404879	0.37974	0.384193	0.349319	0.37031		0.952101	0.718533	student's t-test	0.685894		0.893787	0.387715	student's t-test	0.130361
	6	Adenosine 5'-monophosphate	AMP	C10H14N5O7P	347.063	C00020	HMDB00045	IC/MS	[M ‒ H]‒	10.48 ±0.03	3.23072e+08	5.86035e+08	4.85617e+08	3.60954e+08	4.62785e+08	2.48672e+08	1.0802e+08	2.92297e+07	1.08062e+08	1.14714e+08	2.50578e+08	1.98408e+08		PIPES (IS)	IC/MS	[M ‒ H]‒	2.85409	2.90567	2.88232	2.82021	3.38843	1.84097	0.534098	0.207665	0.46851	0.559223	1.18745	0.986412		0.931443	0.00217556	Welch's t-test	0.704839		2.25824	0.449228	student's t-test	0.0733088
	7	Adenosine 5'-triphosphate	ATP	C10H16N5O13P3	506.996	C00002	HMDB00538	IC/MS	[M ‒ H]‒	20.64 ±0.02	5.84337e+08	4.10403e+08	7.3452e+08	2.44307e+08	1.48561e+08	6.48744e+08	1.93318e+09	1.51638e+09	2.05224e+09	1.45347e+09	1.6574e+09	1.47561e+09		PIPES (IS)	IC/MS	[M ‒ H]‒	5.16215	2.03485	4.35966	1.90882	1.08774	4.80278	9.55851	10.7733	8.89762	7.08554	7.85417	7.33619		0.674878	0.818456	student's t-test	0.441042		0.762106	0.290259	student's t-test	0.0175164
	8	Adenosine 3',5'-cyclic monophosphate	cAMP	C10H12N5O6P	329.053	C00575	HMDB00058	IC/MS	[M ‒ H]‒	11.04 ±0.02	392917	402561	598280	397426	367886	507778	523635	312071	486628	825487	793575	400177		PIPES (IS)	IC/MS	[M ‒ H]‒	0.00347111	0.00199597	0.00355103	0.00310517	0.0026936	0.00375919	0.00258909	0.00221713	0.00210981	0.00402419	0.00376063	0.00198953		1.05986	0.547152	student's t-test	0.776729		1.41329	0.0982636	student's t-test	0.21954
	9	Cytidine 5'-diphosphate	CDP	C9H15N3O11P2	403.018	C00112	HMDB01546	IC/MS	[M ‒ H]‒	13.2 ±0.01	7.25216e+06	9.69092e+06	7.66403e+06	7.44357e+06	5.2335e+06	4.9393e+06	3.0364e+06	2.24093e+06	7.00794e+06	3.53859e+06	5.82512e+06	3.99992e+06		PIPES (IS)	IC/MS	[M ‒ H]‒	0.064067	0.0480494	0.045489	0.0581582	0.0383187	0.0365667	0.0150133	0.0159209	0.0303834	0.0172504	0.0276044	0.0198861		0.844156	0.826931	student's t-test	0.416351		1.05583	0.560442	student's t-test	0.855311
	10	cis-Aconitic acid	cis-Aco	C6H6O6	174.016	C00417	HMDB00072	IC/MS	[M ‒ H]‒	14.43 ±0.01	1.03176e+07	2.24106e+07	1.98114e+07	1.11218e+07	1.28782e+07	1.12647e+07	2.13488e+07	1.28966e+07	2.14479e+07	1.94982e+07	1.71044e+07	1.43067e+07		PIPES (IS)	IC/MS	[M ‒ H]‒	0.0911475	0.111116	0.117588	0.0868973	0.0942918	0.0833949	0.105558	0.0916252	0.092989	0.0950523	0.0810552	0.0711278		0.827208	0.280189	student's t-test	0.0983246		0.852028	0.579902	student's t-test	0.157227
	11	Citric acid	Cit	C6H8O7	192.027	C00158	HMDB00094	IC/MS	[M ‒ H]‒	13.33 ±0.01	4.07945e+08	6.94502e+08	5.47713e+08	4.1153e+08	5.05228e+08	3.9307e+08	5.41217e+08	3.92477e+08	5.59829e+08	4.89741e+08	4.46081e+08	4.03401e+08		PIPES (IS)	IC/MS	[M ‒ H]‒	3.60387	3.44347	3.25089	3.21537	3.69919	2.90998	2.67602	2.78839	2.42718	2.38745	2.11391	2.00556		0.954003	0.329471	student's t-test	0.564028		0.82454	0.937398	student's t-test	0.041523
	12	Cytidine-5'-monophosphate	CMP	C9H14N3O8P	323.052	C00055	HMDB00095	IC/MS	[M ‒ H]‒	7.98 ±0.05	4.08851e+06	7.10343e+06	4.28259e+06	5.401e+06	5.29838e+06	2.06858e+06	2.95772e+06	1.05666e+06	2.63333e+06	2.16545e+06	2.21638e+06	3.42596e+06		PIPES (IS)	IC/MS	[M ‒ H]‒	0.0361188	0.0352202	0.0254189	0.0421992	0.0387938	0.0153141	0.0146243	0.00750713	0.011417	0.0105564	0.0105031	0.0170326		0.995342	0.282368	student's t-test	0.987647		1.13544	0.948067	student's t-test	0.639
	13	Coenzyme A	CoA	C21H36N7O16P3S	767.115	C00010	HMDB01423	IC/MS	[M ‒ H]‒	21.41 ±0.03	3.18647e+06	3.2456e+06	3.17179e+06	1.17796e+06	1.36441e+06	1.4317e+06	831021	1.16741e+06	1.47333e+06	1.81298e+06	2.51282e+06	1.2926e+06		PIPES (IS)	IC/MS	[M ‒ H]‒	0.0281499	0.0160923	0.0188258	0.00920365	0.00998995	0.0105991	0.00410894	0.00829398	0.00638772	0.00883814	0.0119079	0.00642634		0.47239	0.0241973	Welch's t-test	0.0916148		1.44606	0.735497	student's t-test	0.233943
	14	Cytidine 5'-triphosphate	CTP	C9H16N3O14P3	482.985	C00063	HMDB00082	IC/MS	[M ‒ H]‒	17.56 ±0.02	5.44562e+06	4.65251e+06	7.3478e+06	2.6078e+06	1.10436e+06	5.94067e+06	1.64259e+07	1.33919e+07	2.00339e+07	1.4769e+07	1.53571e+07	1.34662e+07		PIPES (IS)	IC/MS	[M ‒ H]‒	0.0481077	0.023068	0.0436121	0.0203753	0.00808594	0.04398	0.0812173	0.095144	0.0868582	0.0719977	0.0727749	0.0669492		0.631088	0.697527	student's t-test	0.340289		0.804355	0.338717	student's t-test	0.0180193
	15	D-Fructose 1,6-bisphosphate	FBP	C6H14O12P2	339.996	C00354	HMDB01058	IC/MS	[M ‒ H]‒	16.95 ±0.01	2.77585e+08	3.65594e+08	2.84725e+08	2.01701e+08	1.58973e+08	3.24999e+08	4.56104e+08	5.27209e+08	5.46018e+08	9.39491e+08	9.3431e+08	7.79631e+08		PIPES (IS)	IC/MS	[M ‒ H]‒	2.45224	1.81269	1.68995	1.57593	1.16397	2.40604	2.25519	3.7456	2.3673	4.57995	4.42756	3.87604		0.864155	0.590122	student's t-test	0.56894		1.5396	0.332043	student's t-test	0.0455455
	16	D-Fructose 6-phosphate	F6P	C6H13O9P	260.03	C00085	HMDB00124	IC/MS	[M ‒ H]‒	9.28 ±0.01	1.18908e+07	1.56558e+07	3.08981e+07	1.42644e+07	4.48281e+06	1.5365e+07	8.89445e+07	3.69972e+07	2.44137e+07	1.33063e+08	6.16833e+07	4.01153e+07		PIPES (IS)	IC/MS	[M ‒ H]‒	0.105046	0.0776244	0.183392	0.111451	0.0328223	0.113751	0.439782	0.26285	0.105847	0.648674	0.292308	0.199439		0.704863	0.82671	student's t-test	0.433201		1.41057	0.663366	student's t-test	0.544944
	17	D-Gluconic acid	Gluconic acid	C6H12O7	196.058	C00257	HMDB00625	IC/MS	[M ‒ H]‒	3.15 ±0.01	1.50246e+07	2.5775e+07	1.54926e+07	1.34415e+07	1.13431e+07	8.71369e+06	2.07359e+07	1.38245e+07	2.49774e+07	2.30275e+07	1.70632e+07	2.90337e+07		PIPES (IS)	IC/MS	[M ‒ H]‒	0.13273	0.127797	0.0919544	0.105021	0.0830519	0.0645093	0.102528	0.0982177	0.108291	0.112258	0.0808601	0.144345		0.716583	0.907347	student's t-test	0.12792		1.09198	0.0494489	Welch's t-test	0.658246
	18	D-Glucose 1-phosphate	G1P	C6H13O9P	260.03	C00103	HMDB01586	IC/MS	[M ‒ H]‒	6.63 ±0.01	1.82965e+07	2.432e+07	2.56371e+07	1.53351e+07	1.14864e+07	1.82778e+07	5.46418e+07	3.46055e+07	2.6024e+07	7.7638e+07	5.20468e+07	4.0799e+07		PIPES (IS)	IC/MS	[M ‒ H]‒	0.161635	0.120583	0.152166	0.119816	0.0841015	0.135315	0.270174	0.245858	0.112829	0.37848	0.246642	0.202838		0.780951	0.802324	student's t-test	0.180826		1.3166	0.923766	student's t-test	0.408553
	19	D-Glucose 6-phosphate	G6P	C6H13O9P	260.03	C00092	HMDB01401	IC/MS	[M ‒ H]‒	9.06 ±0.01	6.24172e+07	7.63776e+07	1.69801e+08	7.92731e+07	2.46221e+07	8.77135e+07	4.19235e+08	2.12873e+08	1.37011e+08	5.92628e+08	3.26945e+08	2.38146e+08		PIPES (IS)	IC/MS	[M ‒ H]‒	0.551406	0.378695	1.00783	0.619378	0.180278	0.649361	2.07289	1.51238	0.594022	2.88902	1.54935	1.18397		0.747712	0.789803	student's t-test	0.536393		1.34529	0.817748	student's t-test	0.514931
	20	D-Glucuronic acid	Glucuronic acid	C6H10O7	194.043	C00191	HMDB00127	IC/MS	[M ‒ H]‒	5.3 ±0.01	1.09116e+06	3.60026e+06	1.07214e+06	1.07259e+06	849580	747457	1.40904e+06	1.26907e+06	1.63237e+06	1.58317e+06	1.11862e+06	1.2365e+06		PIPES (IS)	IC/MS	[M ‒ H]‒	0.00963951	0.0178508	0.00636354	0.00838035	0.00622047	0.00553358	0.00696695	0.00901625	0.00707724	0.00771783	0.00530095	0.00614742		0.594745	0.118565	student's t-test	0.264		0.831129	0.938073	student's t-test	0.252525
	21	D-Ribose 5-phosphate	R5P	C5H11O8P	230.019	C00117	HMDB01548	IC/MS	[M ‒ H]‒	9.84 ±0.01	9.23694e+06	1.80558e+07	1.57474e+07	7.525e+06	1.14879e+07	1.48886e+07	4.47006e+06	7.16171e+06	3.30128e+07	6.1626e+06	1.38432e+07	5.2126e+06		PIPES (IS)	IC/MS	[M ‒ H]‒	0.0816009	0.0895242	0.0934669	0.0587945	0.0841121	0.110224	0.022102	0.050881	0.143129	0.0300423	0.065601	0.0259151		0.956681	0.104671	student's t-test	0.814533		0.562478	0.212832	student's t-test	0.460211
	22	D-Sedoheputulose 7-phosphate	S7P	C7H15O10P	290.04	C05382	HMDB01068	IC/MS	[M ‒ H]‒	10 ±0.01	1.54095e+06	1.01083e+06	1.45247e+06	1.01151e+06	908632	1.22168e+06	1.15769e+06	658237	926387	1.53834e+06	1.03731e+06	695581		PIPES (IS)	IC/MS	[M ‒ H]‒	0.0136131	0.00501188	0.00862097	0.00790312	0.00665284	0.00904438	0.00572413	0.0046765	0.00401642	0.00749929	0.00491565	0.00345817		0.866197	0.142478	student's t-test	0.66307		1.101	0.30085	student's t-test	0.72421
	23	Deoxythymidine 5'-diphosphate	dTDP	C10H16N2O11P2	402.023	C00363	HMDB01274	IC/MS	[M ‒ H]‒	18.62 ±0.01	248597	521555	371504	333544	262901	163982	132291	58492.8	245120	82336.1	157128	136769		PIPES (IS)	IC/MS	[M ‒ H]‒	0.00219616	0.00258597	0.00220502	0.00260605	0.00192492	0.00121399	0.000654105	0.000415568	0.00106274	0.000401383	0.000744608	0.000679966		0.822219	0.185469	student's t-test	0.381975		0.856288	0.47392	student's t-test	0.661379
	24	Deoxythymidine 5'-monophosphate	dTMP	C10H15N2O8P	322.057	C00364	HMDB01227	IC/MS	[M ‒ H]‒	13.52 ±0.01	91441.2	137048	96688.1	84664.1	108032	90071.6	0	0	0	0	0	0		PIPES (IS)	IC/MS	[M ‒ H]‒	0.00080781	0.000679511	0.000573882	0.000661499	0.00079099	0.000666818	0	0	0	0	0	0		1.02819	0.562435	student's t-test	0.820112		#DIV/0!	#DIV/0!	#DIV/0!	#DIV/0!
	25	Deoxythymidine 5'-triphosphate	dTTP	C10H17N2O14P3	481.989	C00459	HMDB01342	IC/MS	[M ‒ H]‒	22.37 ±0.02	205040	287411	348823	143749	0	270782	727229	542245	983724	540523	565405	479056		PIPES (IS)	IC/MS	[M ‒ H]‒	0.00181137	0.00142504	0.0020704	0.00112314	0	0.00200465	0.00359575	0.00385242	0.004265	0.00263501	0.00267937	0.00238169		0.589394	0.189192	student's t-test	0.299352		0.657044	0.369008	student's t-test	0.00343537
	26	Flavin adenine dinucleotide	FAD	C27H33N9O15P2	785.157	C00016	HMDB01248	IC/MS	[M ‒ H]‒	22.55 ±0.03	969060	1.15622e+06	1.14412e+06	921618	790635	876289	910842	593977	969549	769852	806183	645268		PIPES (IS)	IC/MS	[M ‒ H]‒	0.00856087	0.00573274	0.00679082	0.0072008	0.00578888	0.00648735	0.00450362	0.00421996	0.00420355	0.00375298	0.00382038	0.00320804		0.923764	0.392405	student's t-test	0.591626		0.834014	0.403122	student's t-test	0.030025
	27	Flavin mononucleotide	FMN	C17H21N4O9P	456.105	C00061	HMDB01520	IC/MS	[M ‒ H]‒	21.35 ±0.02	752585	987789	1.03671e+06	728586	625323	665405	904309	552778	984626	681244	768519	534639		PIPES (IS)	IC/MS	[M ‒ H]‒	0.00664848	0.00489764	0.00615328	0.0056926	0.0045785	0.00492613	0.00447132	0.00392726	0.00426891	0.00332102	0.0036419	0.00265803		0.85863	0.570306	student's t-test	0.247376		0.759499	0.461958	student's t-test	0.0371412
	28	Fumaric acid	Fum	C4H4O4	116.011	C00122	HMDB00134	IC/MS	[M ‒ H]‒	9.98 ±0.01	5.87878e+07	1.02135e+08	8.4839e+07	5.72605e+07	4.76219e+07	4.021e+07	7.69972e+07	4.81561e+07	1.19548e+08	1.17478e+08	7.14653e+07	4.73391e+07		PIPES (IS)	IC/MS	[M ‒ H]‒	0.519343	0.506402	0.503553	0.447389	0.348679	0.297683	0.380709	0.342129	0.51831	0.572698	0.338663	0.235353		0.715198	0.0241565	Welch's t-test	0.0789421		0.923914	0.446119	student's t-test	0.794759
	29	Guanosine 5'-diphosphate	GDP	C10H15N5O11P2	443.024	C00035	HMDB01201	IC/MS	[M ‒ H]‒	23.12 ±0.01	2.08117e+07	2.81837e+07	2.26612e+07	2.42808e+07	1.9707e+07	1.57963e+07	1.0772e+07	8.52634e+06	1.78582e+07	1.08472e+07	1.79591e+07	1.20616e+07		PIPES (IS)	IC/MS	[M ‒ H]‒	0.183855	0.13974	0.134503	0.189712	0.144291	0.116943	0.0532618	0.0605762	0.0774253	0.0528795	0.0851057	0.059966		0.984385	0.704593	student's t-test	0.932297		1.03497	0.697395	student's t-test	0.862957
	30	Glycerol 3-phosphate	G3P	C3H9O6P	172.014	C00093	HMDB00126	IC/MS	[M ‒ H]‒	6.62 ±0.01	1.90648e+08	3.24366e+08	2.55235e+08	2.06417e+08	1.98218e+08	1.8751e+08	5.29985e+08	4.02192e+08	6.18941e+08	7.01034e+08	6.8719e+08	4.76605e+08		PIPES (IS)	IC/MS	[M ‒ H]‒	1.68423	1.60827	1.51492	1.61278	1.45132	1.38817	2.62049	2.85741	2.68346	3.41749	3.25649	2.36951		0.926128	0.697882	student's t-test	0.226418		1.10809	0.0902941	student's t-test	0.427664
	31	Guanosine 5'-monophosphate	GMP	C10H14N5O8P	363.058	C00144	HMDB01397	IC/MS	[M ‒ H]‒	18.19 ±0.01	1.49668e+07	2.40874e+07	1.65304e+07	1.8957e+07	2.22161e+07	8.78716e+06	5.51584e+06	1.04335e+06	2.67688e+06	2.71871e+06	5.3648e+06	5.09329e+06		PIPES (IS)	IC/MS	[M ‒ H]‒	0.13222	0.11943	0.0981142	0.148115	0.162662	0.0650531	0.0272728	0.00741254	0.0116058	0.0132535	0.025423	0.025322		1.07453	0.193397	student's t-test	0.79936		1.38252	0.617631	student's t-test	0.462378
	32	Guanosine 5'-triphosphate	GTP	C10H16N5O14P3	522.991	C00044	HMDB01273	IC/MS	[M ‒ H]‒	26.29 ±0.02	1.59692e+07	1.7762e+07	1.97136e+07	9.9937e+06	6.15896e+06	1.79547e+07	4.39823e+07	3.20334e+07	5.11758e+07	3.42855e+07	4.04965e+07	3.80301e+07		PIPES (IS)	IC/MS	[M ‒ H]‒	0.141075	0.0880675	0.117008	0.0780829	0.0450948	0.132922	0.217469	0.227584	0.221876	0.167139	0.191907	0.189072		0.73985	0.527148	student's t-test	0.371471		0.821854	0.245575	student's t-test	0.00904055
	33	Inosine 5'-monophosphate	IMP	C10H13N4O8P	348.047	C00130	HMDB00175	IC/MS	[M ‒ H]‒	17.76 ±0.02	4.4438e+08	7.82383e+08	3.34795e+08	6.03854e+08	6.01815e+08	2.24979e+08	5.64744e+08	2.24605e+08	7.4939e+08	7.64119e+08	4.33269e+08	6.31053e+08		PIPES (IS)	IC/MS	[M ‒ H]‒	3.92574	3.8792	1.98714	4.71805	4.40638	1.66557	2.79235	1.59573	3.24903	3.72503	2.0532	3.13736		1.10191	0.604956	student's t-test	0.788734		1.1674	0.993314	student's t-test	0.572809
	34	Isocitric acid	IsoCit	C6H8O7	192.027	C00311	HMDB00193	IC/MS	[M ‒ H]‒	13.88 ±0.01	1.9131e+07	4.7692e+07	3.93983e+07	2.23231e+07	2.71524e+07	2.81062e+07	3.52244e+07	2.3459e+07	3.18586e+07	2.80271e+07	2.81632e+07	2.11428e+07		PIPES (IS)	IC/MS	[M ‒ H]‒	0.169007	0.236466	0.233844	0.174415	0.198805	0.208076	0.174166	0.166666	0.138125	0.13663	0.133461	0.105114		0.909245	0.343041	student's t-test	0.469606		0.783381	0.908743	student's t-test	0.0805377
	35	Malic acid	Mal	C4H6O5	134.022	C00149	HMDB00744	IC/MS	[M ‒ H]‒	7.91 ±0.01	9.64895e+08	1.4153e+09	1.35294e+09	7.57578e+08	6.78019e+08	6.60751e+08	1.18947e+09	7.61505e+08	1.49377e+09	1.2958e+09	1.14973e+09	7.14994e+08		PIPES (IS)	IC/MS	[M ‒ H]‒	8.52408	7.01734	8.03022	5.91912	4.96433	4.89167	5.88129	5.41018	6.47633	6.31693	5.44838	3.55469		0.669242	0.715645	student's t-test	0.0093354		0.862234	0.250334	student's t-test	0.402341
	36	Nicotinamide adenine dinucleotide	NAD	C21H27N7O14P2	663.109	C00003	HMDB00902	IC/MS	[M ‒ H]‒	7.33 ±0.04	4.31799e+06	5.45641e+06	5.87536e+06	3.56695e+06	3.12717e+06	4.13443e+06	1.09783e+07	7.22216e+06	1.07212e+07	8.69073e+06	9.43353e+06	7.86457e+06		PIPES (IS)	IC/MS	[M ‒ H]‒	0.038146	0.0270539	0.0348726	0.0278694	0.0228966	0.030608	0.0542816	0.0513105	0.0464824	0.0423667	0.0447041	0.0390997		0.81315	0.639939	student's t-test	0.1933		0.829662	0.676751	student's t-test	0.0365571
	37	Reduced nicotinamide adenine dinucleotide phosphate	NADPH	C21H30N7O17P3	745.091	C00005	HMDB00221	IC/MS	[M ‒ H]‒	20.33 ±0.01	978265	1.71538e+06	1.37433e+06	1.57115e+06	732966	704975	1.60571e+06	889203	1.61689e+06	578354	1.09812e+06	870815		PIPES (IS)	IC/MS	[M ‒ H]‒	0.00864219	0.00850517	0.00815717	0.0122758	0.00536664	0.00521907	0.00793934	0.00631742	0.00701014	0.00281944	0.00520382	0.00432937		0.903454	0.00766124	Welch's t-test	0.760097		0.580838	0.625626	student's t-test	0.0240782
	38	Phosphoenolpyruvic acid	PEP	C3H5O6P	167.982	C00074	HMDB00263	IC/MS	[M ‒ H]‒	14.39 ±0.01	9.46594e+06	1.9735e+07	1.37366e+07	7.70448e+06	4.86091e+06	1.24844e+07	5.66881e+07	4.92056e+07	6.18834e+07	7.62501e+07	6.74822e+07	7.13847e+07		PIPES (IS)	IC/MS	[M ‒ H]‒	0.083624	0.0978499	0.0815323	0.0601968	0.0355907	0.0924249	0.280292	0.349586	0.2683	0.371714	0.319788	0.354898		0.71562	0.17692	student's t-test	0.221581		1.16503	0.534328	student's t-test	0.17034
	39	Phosphoribosyl pyrophosphate	PRPP	C5H13O14P3	389.952	C00119	HMDB00280	IC/MS	[M ‒ H]‒	19.12 ±0.01	1.3784e+06	1.42012e+06	1.32992e+06	706970	468305	1.47506e+06	3.33477e+06	3.50045e+06	2.7294e+06	3.10367e+06	3.16567e+06	3.15772e+06		PIPES (IS)	IC/MS	[M ‒ H]‒	0.012177	0.00704124	0.00789361	0.00552371	0.00342885	0.0109201	0.0164886	0.0248692	0.0118335	0.0151302	0.0150016	0.015699		0.732989	0.672944	student's t-test	0.428138		0.861621	0.00629257	Welch's t-test	0.586123
	40	Phosphoric acid	Phosphoric acid	H3O4P	97.9769	C00009	HMDB02142	IC/MS	[M ‒ H]‒	12.1 ±0.02	2.00584e+09	3.3906e+09	2.76991e+09	2.26908e+09	2.21373e+09	1.86895e+09	4.80402e+09	2.41776e+09	7.04191e+09	4.5821e+09	5.42372e+09	4.84881e+09		PIPES (IS)	IC/MS	[M ‒ H]‒	17.72	16.8112	16.4405	17.7288	16.2085	13.8362	23.7533	17.1772	30.5307	22.3374	25.7022	24.1065		0.937257	0.202435	student's t-test	0.42266		1.00959	0.119497	student's t-test	0.956956
	41	Pyruvic acid	Pyr	C3H4O3	88.016	C00022	HMDB00243	IC/MS	[M ‒ H]‒	4.12 ±0.01	1.03006e+07	3.41008e+07	1.65284e+07	7.54169e+06	1.1427e+07	1.18496e+07	9.83589e+07	4.51122e+07	1.19474e+08	1.09334e+08	9.03046e+07	1.28677e+08		PIPES (IS)	IC/MS	[M ‒ H]‒	0.0909974	0.169078	0.0981028	0.0589249	0.0836668	0.0877251	0.486331	0.320503	0.517986	0.532994	0.42794	0.639734		0.643022	0.23066	student's t-test	0.183077		1.20821	0.998412	student's t-test	0.347868
	42	Succinic acid	Suc	C4H6O4	118.027	C00042	HMDB00254	IC/MS	[M ‒ H]‒	7.88 ±0.01	1.56658e+08	2.01353e+08	3.23357e+08	1.20994e+08	1.17524e+08	1.45963e+08	5.19629e+08	3.0967e+08	5.67842e+08	3.63408e+08	4.94769e+08	2.70139e+08		PIPES (IS)	IC/MS	[M ‒ H]‒	1.38395	0.998346	1.91925	0.945352	0.860487	1.08059	2.56928	2.20008	2.46192	1.77159	2.34464	1.34303		0.671021	0.108954	student's t-test	0.16096		0.75495	0.249932	student's t-test	0.129583
	43	Thiamine pyrophosphate	ThPP	C12H18N4O7P2S	424.037	C00068	HMDB01372	IC/MS	[M ‒ H]‒	21.15 ±0.02	755553	884527	1.07197e+06	731133	617390	597647	741608	475596	897946	505200	629717	552379		PIPES (IS)	IC/MS	[M ‒ H]‒	0.00667471	0.00438565	0.00636256	0.0057125	0.00452041	0.0044245	0.00366685	0.00337892	0.00389311	0.00246281	0.00298413	0.00274623		0.841273	0.500903	student's t-test	0.327857		0.748996	0.987353	student's t-test	0.0124282
	44	Uridine 5'-diphosphate	UDP	C9H14N2O12P2	404.002	C00015	HMDB00295	IC/MS	[M ‒ H]‒	19.76 ±0.01	2.05181e+07	3.26273e+07	2.49494e+07	2.12649e+07	1.5586e+07	1.67803e+07	1.11952e+07	7.22993e+06	2.04147e+07	1.16541e+07	1.83772e+07	1.32441e+07		PIPES (IS)	IC/MS	[M ‒ H]‒	0.181261	0.161772	0.148084	0.166147	0.114118	0.124228	0.0553541	0.0513657	0.0885092	0.0568131	0.0870868	0.0658449		0.823617	0.535067	student's t-test	0.195721		1.07435	0.734914	student's t-test	0.76015
	45	Uridine 5'-monophosphate	UMP	C9H13N2O9P	324.036	C00105	HMDB00288	IC/MS	[M ‒ H]‒	14.8 ±0.01	3.01922e+07	4.3957e+07	3.01927e+07	3.52057e+07	3.63845e+07	1.83019e+07	1.79178e+07	9.54944e+06	2.1941e+07	1.71482e+07	1.81851e+07	2.01285e+07		PIPES (IS)	IC/MS	[M ‒ H]‒	0.266724	0.217947	0.179205	0.27507	0.2664	0.135492	0.0885936	0.0678448	0.0951268	0.0835963	0.0861766	0.100071		1.01971	0.478488	student's t-test	0.936892		1.07266	0.558023	student's t-test	0.56344
	46	Uridine 5'-triphosphate	UTP	C9H15N2O15P3	483.969	C00075	HMDB00285	IC/MS	[M ‒ H]‒	23.27 ±0.02	2.17851e+07	2.20992e+07	2.72922e+07	1.20166e+07	5.79217e+06	2.48764e+07	6.55345e+07	5.09336e+07	7.18254e+07	6.15722e+07	5.72412e+07	5.8145e+07		PIPES (IS)	IC/MS	[M ‒ H]‒	0.192454	0.109572	0.16199	0.0938883	0.0424092	0.184165	0.324032	0.361862	0.311404	0.30016	0.271258	0.289076		0.690628	0.508937	student's t-test	0.375068		0.862824	0.471408	student's t-test	0.058197
	47	Alpha-Hydroxyisobutyric acid	2-Hydroxyisobutyric acid	C4H8O3	104.047	－	HMDB00729	IC/MS	[M ‒ H]‒	3.22 ±0.02	1.48371e+07	2.3679e+07	5.17704e+07	8.21985e+07	1.0153e+08	4.88771e+07	7.14014e+07	5.88575e+07	1.59798e+08	2.54454e+08	3.27403e+08	1.51064e+08		PIPES (IS)	IC/MS	[M ‒ H]‒	0.131074	0.117405	0.307277	0.642235	0.743388	0.361847	0.353041	0.418158	0.692814	1.24045	1.55151	0.751033		3.14431	0.446034	student's t-test	0.0373561		2.42006	0.332921	student's t-test	0.0532274
	48	3-Hydroxypropionic acid	3-Hydroxypropionic acid	C3H6O3	90.0317	C01013	HMDB00700	IC/MS	[M ‒ H]‒	3.27 ±0.02	2.80101e+09	4.97664e+09	3.73591e+09	2.46456e+09	2.65775e+09	2.27651e+09	8.58261e+09	4.51124e+09	8.46501e+09	1.09017e+10	9.51696e+09	7.82347e+09		PIPES (IS)	IC/MS	[M ‒ H]‒	24.7447	24.6751	22.1741	19.2562	19.4596	16.8535	42.4363	32.0505	36.7006	53.1451	45.0994	38.8954		0.776173	0.989701	student's t-test	0.0109052		1.23341	0.692983	student's t-test	0.16525
	49	2-Hydroxy-3-methylbutyric acid	2-Hydroxyisovaleric acid	C5H10O3	118.063	－	HMDB00407	IC/MS	[M ‒ H]‒	3.91 ±0.01	7.66472e+06	1.30082e+07	1.62745e+07	1.43879e+07	1.80496e+07	1.47215e+07	2.1996e+07	1.28935e+07	3.30196e+07	3.54688e+07	4.42921e+07	3.60053e+07		PIPES (IS)	IC/MS	[M ‒ H]‒	0.0677116	0.064497	0.0965955	0.112416	0.132156	0.108986	0.108758	0.0916033	0.143159	0.172908	0.209894	0.179005		1.54524	0.667048	student's t-test	0.0292047		1.63544	0.726488	student's t-test	0.0186098
	50	Methylmalonic acid	Methylmalonic acid	C4H6O4	118.027	C02170	HMDB00202	IC/MS	[M ‒ H]‒	7.88 ±0.01	1.56658e+08	2.01353e+08	3.21651e+08	1.20994e+08	1.17524e+08	1.45393e+08	5.26544e+08	3.10174e+08	5.68842e+08	3.63408e+08	4.97315e+08	2.71487e+08		PIPES (IS)	IC/MS	[M ‒ H]‒	1.38395	0.998346	1.90913	0.945352	0.860487	1.07637	2.60347	2.20366	2.46625	1.77159	2.3567	1.34973		0.671622	0.107135	student's t-test	0.158434		0.75316	0.277934	student's t-test	0.129933
	51	Leucinic acid	Leucinic acid	C6H12O3	132.079	－	HMDB00665	IC/MS	[M ‒ H]‒	4.87 ±0.02	2.03698e+06	3.46588e+06	3.26722e+06	2.99587e+06	3.44796e+06	3.06089e+06	4.97937e+06	3.16133e+06	6.09925e+06	7.49712e+06	8.22053e+06	7.10084e+06		PIPES (IS)	IC/MS	[M ‒ H]‒	0.0179951	0.0171845	0.0193922	0.0234074	0.0252453	0.0226604	0.0246203	0.0224599	0.0264437	0.0365479	0.0389559	0.0353028		1.30678	0.826813	student's t-test	0.00510703		1.50708	0.928876	student's t-test	0.00138945
	52	Orotic acid	Orotic acid	C5H4N2O4	156.017	C00295	HMDB00226	IC/MS	[M ‒ H]‒	12.35 ±0.01	339301	1.55386e+06	478821	356129	315166	264048	413061	426225	517388	457674	395322	485792		PIPES (IS)	IC/MS	[M ‒ H]‒	0.00299745	0.00770432	0.00284199	0.00278251	0.00230759	0.0019548	0.00204236	0.00302815	0.00224317	0.00223113	0.00187337	0.00241518		0.520158	0.0441833	Welch's t-test	0.306589		0.891436	0.437121	student's t-test	0.480079
	53	DL-4-Hydroxyphenyllactic acid	4-Hydroxyphenyllactic acid	C9H10O4	182.058	－	HMDB00755	IC/MS	[M ‒ H]‒	12.62 ±0.01	1.74165e+06	2.52572e+06	2.54628e+06	1.39645e+06	1.49208e+06	2.2332e+06	3.01013e+06	1.9667e+06	3.72175e+06	2.16017e+06	2.29392e+06	2.80366e+06		PIPES (IS)	IC/MS	[M ‒ H]‒	0.0153861	0.012523	0.0151132	0.0109108	0.0109248	0.0165328	0.0148835	0.0139726	0.0161359	0.0105307	0.0108705	0.0139388		0.891827	0.383929	student's t-test	0.497648		0.785475	0.501599	student's t-test	0.0620204
	54	2,3-Pyridinedicarboxylic acid	Quinolinic acid	C7H5NO4	167.022	C03722	HMDB00232	IC/MS	[M ‒ H]‒	9.93 ±0.01	0	148084	0	0	0	0	0	0	0	0	0	0		PIPES (IS)	IC/MS	[M ‒ H]‒	0	0.000734228	0	0	0	0	0	0	0	0	0	0		0	#DIV/0!	#DIV/0!	#DIV/0!		#DIV/0!	#DIV/0!	#DIV/0!	#DIV/0!
	55	D-Fructose 1-phosphate	F1P	C6H13O9P	260.03	C01094	HMDB60467	IC/MS	[M ‒ H]‒	8.52 ±0.01	2.79746e+06	3.97208e+06	3.4483e+06	1.39118e+06	1.78545e+06	3.85089e+06	1.70801e+06	3.81152e+06	3.95096e+06	4.1961e+06	6.22706e+06	2.66171e+06		PIPES (IS)	IC/MS	[M ‒ H]‒	0.0247133	0.0196943	0.020467	0.0108696	0.0130727	0.0285089	0.00844516	0.0270793	0.0171297	0.0204557	0.0295091	0.013233		0.808501	0.146525	student's t-test	0.512232		1.20025	0.866833	student's t-test	0.648873
	56	D-Galactose 1-phosphate	Ga1P	C6H13O9P	260.03	C03384	HMDB00645	IC/MS	[M ‒ H]‒	6.44 ±0.02	4.82367e+06	6.71381e+06	4.9284e+06	4.59281e+06	4.13689e+06	3.55497e+06	8.47531e+06	5.3821e+06	9.55974e+06	1.01414e+07	8.30917e+06	7.70342e+06		PIPES (IS)	IC/MS	[M ‒ H]‒	0.0426133	0.0332883	0.029252	0.0358846	0.0302896	0.0263182	0.0419058	0.0382376	0.0414469	0.0494389	0.0393759	0.0382986		0.879593	0.659393	student's t-test	0.431778		1.04542	0.19135	student's t-test	0.64752
	57	2-Phospho-D-glyceric acid	2-PGA	C3H7O7P	185.993	C00631	HMDB03391	IC/MS	[M ‒ H]‒	12.47 ±0.01	1.14021e+08	2.4004e+08	1.44783e+08	9.48214e+07	6.86006e+07	1.14613e+08	2.46433e+08	2.47895e+08	3.16069e+08	4.12916e+08	3.62172e+08	4.03818e+08		PIPES (IS)	IC/MS	[M ‒ H]‒	1.00729	1.19017	0.859346	0.74086	0.502281	0.848507	1.21847	1.76119	1.37034	2.01294	1.71628	2.00763		0.684261	0.933153	student's t-test	0.0832288		1.31881	0.537613	student's t-test	0.0708016
	58	D-Glucaric acid	Glucaric acid	C6H10O8	210.038	C00818	HMDB29881	IC/MS	[M ‒ H]‒	7.69 ±0.01	6.97389e+07	1.0158e+08	8.16391e+07	6.46504e+07	5.24477e+07	3.33818e+07	6.37047e+07	4.07645e+07	7.47579e+07	6.44887e+07	5.30734e+07	3.20608e+07		PIPES (IS)	IC/MS	[M ‒ H]‒	0.616087	0.503653	0.48456	0.505128	0.384013	0.247132	0.314985	0.289615	0.324118	0.314378	0.251507	0.159394		0.708267	0.465265	student's t-test	0.1406		0.780946	0.0999344	student's t-test	0.215845
	59	UDP-alpha-D-galactose	UDP-Galac	C15H24N2O17P2	566.055	C00052	－	IC/MS	[M ‒ H]‒	14.45 ±0.01	275025	374956	367811	313816	265231	209937	234994	155045	445727	213351	220690	201625		PIPES (IS)	IC/MS	[M ‒ H]‒	0.00242963	0.0018591	0.0021831	0.00245192	0.00194197	0.00155421	0.00116192	0.00110153	0.00193248	0.00104007	0.00104582	0.0010024		0.919075	0.57539	student's t-test	0.601136		0.736021	0.00516824	Welch's t-test	0.301403
	60	D-Mannose 6-phosphate	M6P	C6H13O9P	260.03	C00275	HMDB01078	IC/MS	[M ‒ H]‒	9.49 ±0.01	4.3175e+07	3.11919e+07	9.28264e+07	4.03664e+07	1.71049e+07	5.48454e+07	2.5531e+08	1.71152e+08	1.14747e+08	4.043e+08	2.73082e+08	1.86049e+08		PIPES (IS)	IC/MS	[M ‒ H]‒	0.381417	0.154655	0.550961	0.315392	0.125239	0.406032	1.26237	1.21596	0.497495	1.97093	1.29409	0.924965		0.778874	0.683705	student's t-test	0.601506		1.40801	0.790444	student's t-test	0.362188
	61	3-Hydroxy-3-methylglutaric acid	3-Hydroxymethylglutaric acid	C6H10O5	162.053	C03761	HMDB00355	IC/MS	[M ‒ H]‒	7.49 ±0.01	2.54603e+06	4.47102e+06	2.6258e+06	3.92175e+06	1.87629e+06	1.47086e+06	2.69134e+06	2.55054e+06	3.95487e+06	4.07501e+06	2.80847e+06	3.63609e+06		PIPES (IS)	IC/MS	[M ‒ H]‒	0.0224921	0.0221681	0.0155852	0.0306415	0.0137378	0.0108891	0.0133072	0.0181205	0.0171466	0.0198654	0.0133089	0.0180773		0.917387	0.23517	student's t-test	0.812876		1.05512	0.721053	student's t-test	0.733799
	62	2-Ketoadipic acid	2-Ketoadipic acid	C6H8O5	160.037	C00322	HMDB00225	IC/MS	[M ‒ H]‒	9.26 ±0.01	126700	599399	282971	190359	0	0	256720	329441	447275	459567	251756	0		PIPES (IS)	IC/MS	[M ‒ H]‒	0.00111929	0.00297193	0.00167955	0.00148731	0	0	0.00126934	0.00234055	0.00193919	0.00224036	0.00119303	0		0.257732	0.89917	student's t-test	0.125661		0.618732	0.378043	student's t-test	0.382005
	63	D-Glucose	Glucose	C6H12O6	180.16	C00031	HMDB00122	IC/MS	[M ‒ H]‒	2.78 ±0.01	1.25262e+08	1.24788e+08	1.17519e+08	8.12997e+07	5.95998e+07	4.48157e+07	1.83942e+08	1.25631e+08	9.04086e+07	1.9778e+08	1.75889e+08	1.62047e+08		PIPES (IS)	IC/MS	[M ‒ H]‒	1.10659	0.618721	0.697521	0.635213	0.436379	0.33178	0.909493	0.892558	0.391973	0.964164	0.833513	0.805638		0.579227	0.514507	student's t-test	0.124834		1.18655	0.153032	student's t-test	0.483016
	64	Thymidine	Thymidine	C10H14N2O5	242.09	C00214	HMDB00273	IC/MS	[M ‒ H]‒	5.29 ±0.01	746257	1.30165e+06	912462	774700	637829	546085	1.2955e+06	1.01492e+06	1.35389e+06	1.3868e+06	1.02729e+06	977779		PIPES (IS)	IC/MS	[M ‒ H]‒	0.00659259	0.00645383	0.00541582	0.0060529	0.00467007	0.00404278	0.00640556	0.00721056	0.00586987	0.00676054	0.00486818	0.00486116		0.799781	0.562202	student's t-test	0.153315		0.846243	0.550826	student's t-test	0.24976
	65	Uracil	Uracil	C4H4N2O2	112.027	C00106	HMDB00300	IC/MS	[M ‒ H]‒	5.56 ±0.02	1.11008e+06	1.7432e+06	1.12585e+06	954034	1.02125e+06	725367	1.20294e+06	922580	1.77276e+06	1.72737e+06	2.00706e+06	1.74421e+06		PIPES (IS)	IC/MS	[M ‒ H]‒	0.00980667	0.0086431	0.00668238	0.00745407	0.00747739	0.00537004	0.00594786	0.00655455	0.00768593	0.0084208	0.00951118	0.00867158		0.80779	0.739943	student's t-test	0.233553		1.31777	0.590657	student's t-test	0.0243489
	66	Uridine	Uridine	C9H12N2O6	244.07	C00299	HMDB00296	IC/MS	[M ‒ H]‒	5.94 ±0.01	7.98824e+06	6.56446e+06	6.21489e+06	4.73045e+06	6.69763e+06	3.56264e+06	6.13525e+06	3.81014e+06	4.47683e+06	5.76554e+06	4.76618e+06	3.58818e+06		PIPES (IS)	IC/MS	[M ‒ H]‒	0.0705697	0.0325478	0.0368878	0.0369601	0.0490388	0.0263749	0.0303355	0.0270694	0.0194096	0.0281066	0.0225862	0.0178391		0.80264	0.457843	student's t-test	0.537781		0.892175	0.912767	student's t-test	0.563679
	67	O-Acetyl-L-homoserine	O-Acetyl-homoSer	C6H11NO4	161.069	C01077	HMDB29423	IC/MS	[M ‒ H]‒	3.04 ±0.01	1.24415e+06	3.33674e+06	2.18022e+06	1.78015e+06	1.547e+06	1.8324e+06	7.30438e+06	4.08301e+06	9.93997e+06	8.14873e+06	7.66766e+06	6.31306e+06		PIPES (IS)	IC/MS	[M ‒ H]‒	0.0109911	0.0165442	0.0129404	0.0139087	0.0113269	0.0135657	0.0361162	0.0290081	0.0430954	0.0397245	0.0363359	0.0313862		0.95863	0.397037	student's t-test	0.774016		0.992856	0.523365	student's t-test	0.959189
	68	Acetylglycine	Acetyl-Gly	C4H7NO3	117.043	－	HMDB00532	IC/MS	[M ‒ H]‒	3.1 ±0.01	3.88742e+06	6.52059e+06	9.96122e+06	8.34086e+06	9.31764e+06	5.55547e+06	1.15832e+07	5.57526e+06	1.83581e+07	1.93156e+07	2.16688e+07	1.27743e+07		PIPES (IS)	IC/MS	[M ‒ H]‒	0.0343423	0.0323303	0.0591237	0.065169	0.0682221	0.0411283	0.0572726	0.0396099	0.0795928	0.0941622	0.102685	0.0635091		1.38732	0.994465	student's t-test	0.252296		1.47531	0.972109	student's t-test	0.167255
	69	Isovalerylglycine	IsovalerylGly	C7H13NO3	159.09	－	HMDB00678	IC/MS	[M ‒ H]‒	3.79 ±0.01	134937	2.88185e+06	486572	483317	282491	361076	197211	482139	553646	866745	426435	540976		PIPES (IS)	IC/MS	[M ‒ H]‒	0.00119206	0.0142887	0.00288799	0.00377626	0.00206835	0.00267312	0.000975103	0.0034254	0.00240037	0.00422532	0.00202081	0.00268953		0.463706	0.0291356	Welch's t-test	0.508978		1.3139	0.915214	student's t-test	0.501668
	70	N-Acetyl-L-aspartic acid	N-Acetyl-Asp	C6H9NO5	175.048	C01042	HMDB00812	IC/MS	[M ‒ H]‒	6.99 ±0.07	3.89524e+07	3.21012e+07	2.41837e+07	5.02455e+07	1.44572e+07	1.08245e+07	4.22883e+07	3.23877e+07	5.91582e+07	5.57562e+07	4.47527e+07	3.63396e+07		PIPES (IS)	IC/MS	[M ‒ H]‒	0.344114	0.159164	0.14354	0.392579	0.105853	0.0801357	0.209093	0.230102	0.256484	0.271808	0.212077	0.180667		0.894483	0.585329	student's t-test	0.857775		0.955256	0.416559	student's t-test	0.747203
	71	N-Acetyl-L-leucine	N-Acetyl-Leu	C8H15NO3	173.105	C02710	HMDB11756	IC/MS	[M ‒ H]‒	3.78 ±0.06	183402	658250	521701	382445	479329	303847	415757	439379	487443	717888	549020	906750		PIPES (IS)	IC/MS	[M ‒ H]‒	0.00162021	0.00326373	0.0030965	0.00298812	0.00350956	0.00224944	0.00205569	0.00312161	0.00211334	0.00349965	0.00260173	0.00450803		1.09607	0.657768	student's t-test	0.708973		1.45521	0.56641	student's t-test	0.164159
	72	Allantoin	Allantoin	C4H6N4O3	158.044	C01551	HMDB00462	IC/MS	[M ‒ H]‒	3.75 ±0.02	2.13317e+07	3.73966e+07	2.25721e+07	2.63773e+07	2.26651e+07	1.80749e+07	2.95342e+07	2.33646e+07	2.98748e+07	3.94674e+07	3.36457e+07	2.572e+07		PIPES (IS)	IC/MS	[M ‒ H]‒	0.188449	0.185419	0.133974	0.206092	0.16595	0.133812	0.146031	0.165996	0.129524	0.192401	0.159442	0.127871		0.996086	0.833584	student's t-test	0.981851		1.08643	0.485231	student's t-test	0.584322
	73	Taurine	Taurine	C2H7NO3S	125.015	C00245	HMDB00251	IC/MS	[M ‒ H]‒	3.42 ±0.02	4.67694e+09	6.4654e+09	5.82774e+09	4.78777e+09	4.57072e+09	4.69234e+09	8.54548e+09	5.80931e+09	9.03165e+09	8.10586e+09	8.03435e+09	7.68674e+09		PIPES (IS)	IC/MS	[M ‒ H]‒	41.317	32.0566	34.5899	37.4079	33.466	34.7384	42.2527	41.2728	39.1574	39.5155	38.0736	38.2157		0.978222	0.300344	student's t-test	0.806629		0.943936	0.402965	student's t-test	0.0883221
	74	N-Acetyl-DL-alanine	N-Acetyl-Ala	C5H9NO3	131.058	－	HMDB00766	IC/MS	[M ‒ H]‒	3.08 ±0.04	1.14787e+06	2.33346e+06	1.42958e+06	1.48523e+06	1.23269e+06	1.24257e+06	3.37611e+06	2.09695e+06	3.88219e+06	3.92947e+06	3.92244e+06	3.85156e+06		PIPES (IS)	IC/MS	[M ‒ H]‒	0.0101405	0.0115698	0.00848509	0.0116044	0.00902556	0.00919902	0.016693	0.0148979	0.0168315	0.0191559	0.0185878	0.0191485		0.987867	0.931563	student's t-test	0.925048		1.17492	0.167287	student's t-test	0.0122529
	75	N-Acetyl-L-glutamine	N-Acetyl-Gln	C7H12N2O4	188.08	－	HMDB06029	IC/MS	[M ‒ H]‒	2.91 ±0.01	321737	1.94755e+06	414943	328385	333380	304551	678440	510612	707245	856139	615249	767398		PIPES (IS)	IC/MS	[M ‒ H]‒	0.00284229	0.0096563	0.00246285	0.00256574	0.00244095	0.00225465	0.00335452	0.00362769	0.00306631	0.00417362	0.00291557	0.00381522		0.485337	0.00298685	Welch's t-test	0.386655		1.08518	0.315924	student's t-test	0.522714
	76	O-Phospho-L-serine	O-Phospho-Ser	C3H8NO6P	185.009	C01005	HMDB01721	IC/MS	[M ‒ H]‒	11.65 ±0.01	393341	459639	488790	379926	327284	369076	615554	471385	916476	622512	601432	612867		PIPES (IS)	IC/MS	[M ‒ H]‒	0.00347485	0.00227898	0.00290116	0.00296844	0.00239631	0.00273234	0.00304358	0.00334899	0.00397345	0.0030347	0.0028501	0.00304695		0.935542	0.375418	student's t-test	0.652806		0.861637	0.102727	student's t-test	0.164036
	77	O-Succinyl-L-homoserine	O-Succinyl-homoSer	C8H13NO6	219.074	C01118	－	IC/MS	[M ‒ H]‒	6.6 ±0.04	0	166764	135399	95122.4	123883	0	0	0	458027	98966.9	124372	0		PIPES (IS)	IC/MS	[M ‒ H]‒	0	0.000826848	0.000803648	0.000743212	0.000907051	0	0	0	0.00198581	0.000482457	0.000589382	0		1.01212	0.973688	student's t-test	0.987316		0.539749	0.139547	student's t-test	0.680068
	78	1,6-Anhydro-beta-D-glucose	Levoglucosan	C6H10O5	162.053	－	HMDB00640	IC/MS	[M ‒ H]‒	2.79 ±0.01	1.95484e+07	2.09939e+07	1.80647e+07	1.18723e+07	9.32005e+06	6.99449e+06	2.86796e+07	1.85651e+07	1.46802e+07	3.08019e+07	2.61187e+07	2.50528e+07		PIPES (IS)	IC/MS	[M ‒ H]‒	0.172695	0.104091	0.107221	0.0927608	0.0682397	0.0517816	0.141805	0.131897	0.063647	0.150157	0.123772	0.124554		0.554109	0.441638	student's t-test	0.0873809		1.18122	0.22138	student's t-test	0.477814
	79	L-Arabinose	Arabinose	C5H10O5	150.053	C00259	HMDB00646	IC/MS	[M ‒ H]‒	2.79 ±0.01	3.41497e+06	3.44871e+06	3.00565e+06	1.92301e+06	1.53352e+06	1.12464e+06	5.02659e+06	3.22564e+06	2.58736e+06	5.35098e+06	4.48423e+06	4.29676e+06		PIPES (IS)	IC/MS	[M ‒ H]‒	0.0301685	0.0170993	0.0178397	0.0150249	0.0112282	0.00832594	0.0248538	0.0229168	0.0112177	0.0260857	0.0212501	0.0213619		0.531105	0.346303	student's t-test	0.0944039		1.1646	0.245567	student's t-test	0.515973
	80	D-Arabitol	Arabitol	C5H12O5	152.068	C01904	HMDB00568	IC/MS	[M ‒ H]‒	2.66 ±0.02	5.31372e+06	8.82054e+06	8.85251e+06	6.28649e+06	4.10233e+06	4.06537e+06	1.1621e+07	7.2246e+06	1.50839e+07	1.13002e+07	9.47331e+06	9.59488e+06		PIPES (IS)	IC/MS	[M ‒ H]‒	0.0469425	0.0437339	0.0525431	0.0491177	0.0300365	0.0300968	0.0574595	0.0513278	0.0653971	0.0550877	0.0448926	0.0477022		0.762822	0.28223	student's t-test	0.173791		0.847852	0.715722	student's t-test	0.15717
	81	meso-Erythritol	meso-Erythritol	C4H10O4	122.058	－	HMDB02994	IC/MS	[M ‒ H]‒	2.66 ±0.01	123678	317637	183521	154492	96233.5	89560.5	302319	200073	447438	358612	204327	421933		PIPES (IS)	IC/MS	[M ‒ H]‒	0.0010926	0.0015749	0.00108927	0.00120708	0.000704604	0.000663035	0.0014948	0.00142144	0.0019399	0.00174821	0.000968273	0.0020977		0.685355	0.919777	student's t-test	0.173006		0.99136	0.381139	student's t-test	0.971739
	82	Galactitol	Galactitol	C6H14O6	182.079	C01697	HMDB00107	IC/MS	[M ‒ H]‒	2.64 ±0.01	1.14727e+07	1.50638e+07	1.33895e+07	1.0068e+07	8.48389e+06	9.7356e+06	1.69356e+07	9.05184e+06	2.20324e+07	1.42822e+07	1.45083e+07	1.64437e+07		PIPES (IS)	IC/MS	[M ‒ H]‒	0.101352	0.0746892	0.079472	0.0786638	0.0621175	0.0720746	0.0837372	0.0643096	0.095523	0.0696249	0.0687528	0.081752		0.833053	0.51121	student's t-test	0.209296		0.903764	0.350561	student's t-test	0.479109
	83	Glycerol	Glycerol	C3H8O3	92.0473	C00116	HMDB00131	IC/MS	[M ‒ H]‒	2.68 ±0.02	477455	893493	628746	752339	519641	441559	1.5763e+06	1.26386e+06	1.78909e+06	1.30505e+06	1.47432e+06	1.16245e+06		PIPES (IS)	IC/MS	[M ‒ H]‒	0.00421793	0.0044301	0.00373185	0.00587819	0.00380472	0.00326895	0.00779396	0.00897918	0.00775672	0.00636204	0.0069866	0.00577929		1.0462	0.12642	student's t-test	0.827972		0.779782	0.859809	student's t-test	0.0276096
	84	Lactitol	Lactitol	C12H24O11	344.132	C13542	HMDB40937	IC/MS	[M ‒ H]‒	2.62 ±0.01	3.42422e+06	5.10396e+06	5.29352e+06	2.84576e+06	2.16821e+06	2.27681e+06	2.3637e+06	1.18268e+06	2.99856e+06	1.83897e+06	1.71886e+06	1.49366e+06		PIPES (IS)	IC/MS	[M ‒ H]‒	0.0302502	0.0253064	0.0314191	0.0222346	0.0158752	0.0168557	0.0116872	0.00840246	0.0130005	0.00896485	0.00814542	0.00742592		0.631964	0.946364	student's t-test	0.0172788		0.741496	0.191193	student's t-test	0.118389
	85	Beta-Lactose	Beta-Lactose	C12H22O11	342.116	C01970	HMDB41627	IC/MS	[M ‒ H]‒	2.78 ±0.06	3.45923e+06	4.95243e+06	3.64816e+06	2.77624e+06	2.13901e+06	1.73505e+06	3.74814e+06	2.31018e+06	3.27499e+06	3.57426e+06	3.94601e+06	3.57151e+07		PIPES (IS)	IC/MS	[M ‒ H]‒	0.0305595	0.0245551	0.0216532	0.0216913	0.0156615	0.0128449	0.0185325	0.0164128	0.0141989	0.0174243	0.0186995	0.177563		0.65389	0.99495	student's t-test	0.0748371		4.34814	0.00110679	Welch's t-test	0.410688
	86	D-Erythrose	Erythrose	C4H8O4	120.042	C01796	HMDB02649	IC/MS	[M ‒ H]‒	2.79 ±0.01	1.51208e+07	1.59657e+07	1.38049e+07	8.65602e+06	7.14841e+06	4.86278e+06	2.38761e+07	1.57251e+07	1.14194e+07	2.61788e+07	2.22858e+07	2.04065e+07		PIPES (IS)	IC/MS	[M ‒ H]‒	0.133581	0.079161	0.0819374	0.0676314	0.0523394	0.0360002	0.118054	0.11172	0.0495097	0.12762	0.105609	0.101454		0.529291	0.420689	student's t-test	0.0809686		1.19836	0.242249	student's t-test	0.472884
	87	N2-Acetyl-L-asparagine	N-Acetyl-Asn	C6H10N2O4	174.064		HMDB06028	IC/MS	[M ‒ H]‒	2.94 ±0.02	183756	601438	249418	168261	157959	185291	309767	179854	388289	291580	257122	911169		PIPES (IS)	IC/MS	[M ‒ H]‒	0.00162334	0.00298204	0.00148039	0.00131466	0.00115655	0.00137175	0.00153163	0.00127779	0.00168345	0.00142143	0.00121846	0.00453		0.631465	0.0355427	Welch's t-test	0.257387		1.59584	0.0240936	Welch's t-test	0.493098
	88	Pantothenate	Pantothenate	C9H17NO5	219.111	C00864	HMDB00210	IC/MS	[M ‒ H]‒	3.29 ±0.02	1.18405e+07	1.69057e+07	7.13496e+06	1.83539e+07	1.89117e+07	1.88868e+07	1.36555e+07	7.66172e+06	9.7478e+06	1.09019e+07	1.38252e+07	1.6382e+07		PIPES (IS)	IC/MS	[M ‒ H]‒	0.104601	0.0838217	0.0423488	0.143403	0.138468	0.139822	0.0675188	0.0544334	0.0422623	0.0531461	0.0655156	0.0814454		1.82732	0.0128616	Welch's t-test	0.0727362		1.21857	0.884357	student's t-test	0.336607
	89	D-Sorbitol 6-phosphate	Sorbitol-6P	C6H15O9P	262.045	C01096	HMDB05831	IC/MS	[M ‒ H]‒	6.38 ±0.01	1.12078e+06	1.89882e+06	1.28161e+06	931412	548661	527063	2.03121e+06	1.33559e+06	2.05848e+06	2.3358e+06	1.92687e+06	956361		PIPES (IS)	IC/MS	[M ‒ H]‒	0.00990121	0.00941471	0.00760688	0.00727732	0.0040172	0.00390195	0.0100432	0.00948879	0.0089247	0.0113869	0.00913113	0.00475468		0.564446	0.569338	student's t-test	0.0404192		0.888109	0.0535412	student's t-test	0.61924
	90	Uridine 5’-diphosphate (UDP)-D-glucuronate	UDP-glucuronate	C15H22N2O18P2	580.034	C00167	HMDB00935	IC/MS	[M ‒ H]‒	20.57 ±0.02	637323	591904	651763	295253	166029	505995	790631	453814	698532	990704	944117	585949		PIPES (IS)	IC/MS	[M ‒ H]‒	0.00563024	0.00293477	0.00386847	0.00230688	0.00121563	0.00374599	0.00390924	0.00322416	0.00302853	0.00482961	0.00447403	0.00291312		0.584591	0.924582	student's t-test	0.185386		1.20221	0.341331	student's t-test	0.349002
	91	UDP-N-acetyl-alpha-D-glucosamine	UDP-N-acetyl-glucosamine	C17H27N3O17P2	607.082	C00043	HMDB00290	IC/MS	[M ‒ H]‒	13.65 ±0.13	8.26744e+06	9.99235e+06	9.71226e+06	7.62511e+06	6.2704e+06	7.40458e+06	1.0126e+07	6.3692e+06	1.12882e+07	9.72462e+06	8.82779e+06	9.41865e+06		PIPES (IS)	IC/MS	[M ‒ H]‒	0.0730362	0.0495439	0.0576461	0.0595766	0.0459107	0.0548176	0.0500675	0.0452506	0.0489407	0.0474069	0.0418336	0.0468261		0.889465	0.505171	student's t-test	0.451557		0.943212	0.806868	student's t-test	0.299027
	92	Inosine 5'-triphosphate	ITP	C10H15N4O14P3	507.98	C00081	HMDB00189	IC/MS	[M ‒ H]‒	25.97 ±0.01	0	0	0	0	0	0	241175	71288.4	292788	470970	143066	152542		PIPES (IS)	IC/MS	[M ‒ H]‒	0	0	0	0	0	0	0.00119248	0.000506475	0.0012694	0.00229595	0.000677967	0.000758383		#DIV/0!	#DIV/0!	#DIV/0!	#DIV/0!		1.25736	0.350115	student's t-test	0.683103
	93	2,3-Bisphosphoglycerate	2,3-BPG	C3H8O10P2	265.959	C03339	HMDB01294	IC/MS	[M ‒ H]‒	18.89 ±0.01	1.53977e+07	2.3194e+07	1.72642e+07	1.22032e+07	9.92779e+06	2.64131e+07	5.56091e+07	4.50044e+07	5.66252e+07	4.71794e+07	5.46799e+07	6.11968e+07		PIPES (IS)	IC/MS	[M ‒ H]‒	0.136026	0.115	0.10247	0.0953465	0.0726894	0.195542	0.274957	0.319738	0.245502	0.229996	0.25912	0.304248		1.02852	0.126062	student's t-test	0.935466		0.944259	0.999155	student's t-test	0.636093
	94	Inosine 5'-diphosphate	IDP	C10H14N4O11P2	428.013	C00104	HMDB03335	IC/MS	[M ‒ H]‒	22.75 ±0.01	0	97112.4	0	0	0	0	0	0	157904	77354.9	0	0		PIPES (IS)	IC/MS	[M ‒ H]‒	0	0.000481501	0	0	0	0	0	0	0.000684604	0.0003771	0	0		0	#DIV/0!	#DIV/0!	#DIV/0!		0.550829	0.465567	student's t-test	0.71407
	95	2-Dehydro-D-gluconate	2-Dehydrogluconate	C6H10O7	194.043	C06473	HMDB11732	IC/MS	[M ‒ H]‒	3.74 ±0.02	75038.2	344359	53911.5	0	126863	0	0	88826.7	0	81523.4	0	366402		PIPES (IS)	IC/MS	[M ‒ H]‒	0.000662903	0.0017074	0.000319986	0	0.000928866	0	0	0.000631077	0	0.000397421	0	0.00182162		0.345267	0.710256	student's t-test	0.321623		3.51627	0.252819	student's t-test	0.421548
	96	1,5-Anhydro-D-glucitol	1,5-AG	C6H12O5	164.068	C07326	HMDB02712	IC/MS	[M ‒ H]‒	2.68 ±0.03	1.1022e+06	1.44505e+06	1.57784e+06	255514	193988	206082	3.41925e+06	1.71723e+06	3.74342e+06	463251	354852	618141		PIPES (IS)	IC/MS	[M ‒ H]‒	0.00973705	0.00716483	0.00936508	0.00199639	0.00142034	0.00152567	0.0169063	0.0122002	0.0162299	0.00225832	0.00168159	0.00307317		0.18816	0.0928428	student's t-test	0.000983344		0.15469	0.14042	student's t-test	0.00110661
	97	1-Kestose	1-Kestose	C18H32O16	504.169	－	HMDB11729	IC/MS	[M ‒ H]‒	2.87 ±0.01	978704	1.65443e+06	616789	1.01293e+06	751469	432144	802143	424112	983737	1.15645e+06	430537	1.3159e+06		PIPES (IS)	IC/MS	[M ‒ H]‒	0.00864607	0.00820297	0.00366088	0.00791424	0.00550212	0.00319925	0.00396616	0.00301314	0.00426506	0.00563763	0.00204025	0.00654216		0.810126	0.844034	student's t-test	0.569127		1.26464	0.140191	student's t-test	0.524931
	98	Pyridoxal 5'-phosphate	Pyridoxal-5P	C8H10NO6P	247.025	C00018	HMDB01491	IC/MS	[M ‒ H]‒	17.65 ±0.03	1.59473e+06	1.71224e+06	2.04594e+06	1.34889e+06	1.14945e+06	1.60753e+06	2.76018e+06	3.00806e+06	3.45976e+06	2.50634e+06	3.1777e+06	2.05362e+06		PIPES (IS)	IC/MS	[M ‒ H]‒	0.0140881	0.00848962	0.0121435	0.0105391	0.00841607	0.0119008	0.0136476	0.0213711	0.015	0.0122182	0.0150586	0.0102098		0.888679	0.55255	student's t-test	0.540761		0.749454	0.517306	student's t-test	0.205458
	99	N-Acetyl-D-glucosamine 1-phosphate	N-Acetyl-glucosamine-1P	C8H16NO9P	301.056	C04256	HMDB01367	IC/MS	[M ‒ H]‒	6.21 ±0.01	0	0	0	77257.6	0	0	0	0	0	0	0	0		PIPES (IS)	IC/MS	[M ‒ H]‒	0	0	0	0.000603631	0	0	0	0	0	0	0	0		#DIV/0!	#DIV/0!	#DIV/0!	#DIV/0!		#DIV/0!	#DIV/0!	#DIV/0!	#DIV/0!
	100	Ketoleucine	Ketoleucine	C6H10O3	130.063	－	HMDB00695	IC/MS	[M ‒ H]‒	7.8 ±0.01	903855	2.25421e+06	2.06235e+06	1.5412e+06	1.47006e+06	1.61e+06	1.10987e+07	8.7615e+06	1.35181e+07	3.04852e+07	3.30505e+07	2.21206e+07		PIPES (IS)	IC/MS	[M ‒ H]‒	0.00798483	0.0111768	0.0122408	0.0120417	0.0107635	0.0119192	0.0548771	0.0622468	0.0586086	0.148613	0.156621	0.109975		1.10579	0.184112	student's t-test	0.455676		2.36274	0.0427196	Welch's t-test	0.0288148
	101	N-Acetyl-L-glutamate	N-Acetyl-Glu	C7H11NO5	189.064	C00624	HMDB01138	IC/MS	[M ‒ H]‒	6.83 ±0.01	1.39899e+06	1.7343e+06	997672	1.83437e+06	899774	570172	1.13425e+06	807943	2.38714e+06	1.8322e+06	1.30407e+06	1.54283e+06		PIPES (IS)	IC/MS	[M ‒ H]‒	0.0123589	0.008599	0.00592157	0.0143323	0.00658798	0.0042211	0.00560823	0.0057401	0.0103496	0.00893187	0.00617977	0.00767038		0.935336	0.544291	student's t-test	0.879245		1.04996	0.413085	student's t-test	0.846504
	102	Creatine phosphate	Creatine phosphate	C4H10N3O5P	211.036	C02305	HMDB01511	IC/MS	[M ‒ H]‒	5.67 ±0.03	1.11343e+08	1.14356e+08	1.89431e+08	6.14723e+07	4.31723e+07	1.71812e+08	2.04099e+09	1.32447e+09	1.73688e+09	7.35409e+08	7.36613e+08	1.15457e+09		PIPES (IS)	IC/MS	[M ‒ H]‒	0.983625	0.567	1.12435	0.480296	0.3161	1.27196	10.0916	9.40982	7.53034	3.58507	3.4907	5.7401		0.773226	0.486647	student's t-test	0.58322		0.474104	0.958345	student's t-test	0.011114
	103	N-Carbamoyl-L-aspartate	N-Carbamoyl-Asp	C5H8N2O5	176.043	C00438	HMDB00828	IC/MS	[M ‒ H]‒	7.53 ±0.01	77001.4	235205	123046	0	0	0	70597.4	67349.5	66379.5	0	0	99041.3		PIPES (IS)	IC/MS	[M ‒ H]‒	0.000680246	0.00116619	0.000730328	0	0	0	0.000349066	0.00047849	0.000287793	0	0	0.000492397		0	#DIV/0!	#DIV/0!	#DIV/0!		0.441473	0.20994	student's t-test	0.29743
	104	2'-Deoxyuridine	Deoxyuridine	C9H12N2O5	228.075	C00526	HMDB00012	IC/MS	[M ‒ H]‒	4.76 ±0.01	818067	1.54651e+06	1.15695e+06	614280	609340	654411	1.54503e+06	1.4035e+06	1.91518e+06	1.18959e+06	1.29556e+06	1.21079e+06		PIPES (IS)	IC/MS	[M ‒ H]‒	0.00722697	0.00766787	0.00686695	0.00479951	0.00446148	0.00484474	0.00763932	0.00997126	0.00830338	0.00579918	0.00613948	0.0060196		0.648188	0.428425	student's t-test	0.00061546		0.692995	0.0404451	Welch's t-test	0.0593772
	105	Maltotetraose	Maltotetraose	C24H42O21	666.222	C02052	HMDB01296	IC/MS	[M ‒ H]‒	2.94 ±0.03	875038	1.54634e+06	642419	793888	608681	469726	690900	459731	952498	1.0381e+06	395472	1.09638e+06		PIPES (IS)	IC/MS	[M ‒ H]‒	0.00773026	0.00766706	0.00381301	0.00620282	0.00445665	0.00347748	0.00341612	0.0032662	0.00412962	0.00506065	0.00187408	0.00545082		0.735903	0.549275	student's t-test	0.3285		1.14554	0.104778	student's t-test	0.67553
	106	Adenylosuccinic acid	Succinyl AMP	C14H18N5O11P	463.074	C03794	HMDB00536	IC/MS	[M ‒ H]‒	19.54 ±0.01	1.47158e+07	2.15366e+07	1.06372e+07	1.0371e+07	1.06125e+07	6.63978e+06	4.50318e+06	1.76622e+06	5.32335e+06	5.12117e+06	6.51531e+06	3.81363e+06		PIPES (IS)	IC/MS	[M ‒ H]‒	0.130002	0.106782	0.0631357	0.0810307	0.0777029	0.0491557	0.0222657	0.0125483	0.0230797	0.0249653	0.0308751	0.01896		0.693149	0.420686	student's t-test	0.236663		1.29203	0.983397	student's t-test	0.307636
	107	5-aminoimidazole-4-carboxamide-1-β-D-ribofuranosyl 5'-monophosphate	AICARP	C9H15N4O8P	338.063	－	－	IC/MS	[M ‒ H]‒	10.3 ±0.01	0	188769	118138	98995.4	64900.2	0	91640	82414.5	177074	111962	79572.8	0		PIPES (IS)	IC/MS	[M ‒ H]‒	0	0.000935951	0.000701197	0.000773473	0.000475187	0	0.00045311	0.000585521	0.000767717	0.000545806	0.000377084	0		0.762704	0.781767	student's t-test	0.737412		0.510914	0.484274	student's t-test	0.18727
	108	Alpha-D-Glucosamine 1-phosphate	Glucosamine 1P	C6H14NO8P	259.046	C06156	HMDB01109	IC/MS	[M ‒ H]‒	6.18 ±0.21	630963	1.66046e+06	1.13058e+06	2.18148e+06	751363	216459	7.26436e+06	36209.7	4.26465e+06	2.8801e+06	45055	1.19436e+06		PIPES (IS)	IC/MS	[M ‒ H]‒	0.00557405	0.00823288	0.00671043	0.0170444	0.00550134	0.00160249	0.0359183	0.000257255	0.0184897	0.0140403	0.000213509	0.00593794		1.17696	0.0537188	student's t-test	0.809482		0.369371	0.263572	student's t-test	0.357066
	109	2-Methylhippuric acid	2-Methylhippuric acid	C10H11NO3	193.074	－	HMDB11723	IC/MS	[M ‒ H]‒	7.6 ±0.01	274348	1.1065e+07	577427	864512	458226	752530	343708	1.71458e+06	619110	1.25575e+06	505239	788260		PIPES (IS)	IC/MS	[M ‒ H]‒	0.00242364	0.0548626	0.00342726	0.00675462	0.00335504	0.00557114	0.00169945	0.0121814	0.0026842	0.00612167	0.00239426	0.00391894		0.258275	0.00660059	Welch's t-test	0.477476		0.750669	0.18973	student's t-test	0.7151
	110	Ketoisoleucine	Ketoisoleucine	C6H10O3	130.063	－	－	IC/MS	[M ‒ H]‒	7.3 ±0.01	783141	1.74536e+06	1.45873e+06	1.3388e+06	1.31644e+06	1.35911e+06	1.1156e+07	8.56744e+06	7.73279e+06	2.726e+07	3.18398e+07	1.86483e+07		PIPES (IS)	IC/MS	[M ‒ H]‒	0.00691843	0.00865381	0.00865815	0.0104604	0.00963872	0.0100618	0.0551605	0.0608681	0.033526	0.132891	0.150884	0.0927127		1.24475	0.287307	student's t-test	0.0342347		2.51739	0.379965	student's t-test	0.0166867
	111	Alpha-Ketovaline	2-Ketoisovaleric acid	C5H8O3	116.047	C00141	HMDB00019	IC/MS	[M ‒ H]‒	5.61 ±0.01	1.07576e+06	2.21858e+06	2.86996e+06	2.48338e+06	1.54884e+06	1.74744e+06	1.59806e+07	1.03175e+07	1.27768e+07	3.46065e+07	3.14432e+07	2.41176e+07		PIPES (IS)	IC/MS	[M ‒ H]‒	0.0095035	0.0110001	0.0170344	0.0194032	0.0113403	0.0129366	0.0790156	0.0733016	0.0553949	0.168704	0.149004	0.119904		1.16362	0.931579	student's t-test	0.576582		2.10682	0.402517	student's t-test	0.00844966
	112	L-Cysteinesulfinic acid	Cysteinesulfinic acid	C3H7NO4S	153.01	C00606	HMDB00996	IC/MS	[M ‒ H]‒	7.3 ±0.01	759428	993382	726190	689895	662839	624864	1.19124e+06	680368	1.10492e+06	1.04973e+06	887020	934214		PIPES (IS)	IC/MS	[M ‒ H]‒	0.00670894	0.00492537	0.00431022	0.0053903	0.00485319	0.00462599	0.00589002	0.00483374	0.00479045	0.00511736	0.00420346	0.00464457		0.932575	0.180563	student's t-test	0.659451		0.900167	0.700187	student's t-test	0.311426
	113	L-Cysteic acid	Cysteic acid	C3H7NO5S	169.004	C00506	HMDB02757	IC/MS	[M ‒ H]‒	8.72 ±0.01	201186	528820	351313	220905	206878	284302	349441	165448	417210	261487	326747	387775		PIPES (IS)	IC/MS	[M ‒ H]‒	0.00177731	0.00262199	0.00208518	0.00172598	0.00151472	0.00210475	0.0017278	0.00117544	0.00180885	0.00127473	0.00154841	0.00192788		0.824344	0.656881	student's t-test	0.275947		1.00826	0.950394	student's t-test	0.964582
	114	Pyrophosphate	Pyrophosphate	H4P2O7	177.943	C00013	HMDB00250	IC/MS	[M ‒ H]‒	12.1 ±0.02	2.66755e+08	4.43043e+08	3.70373e+08	3.01613e+08	2.93364e+08	2.45022e+08	6.03159e+08	3.03148e+08	8.39376e+08	5.62942e+08	6.88327e+08	5.90492e+08		PIPES (IS)	IC/MS	[M ‒ H]‒	2.35657	2.19669	2.19831	2.35657	2.14796	1.81395	2.98229	2.15374	3.63917	2.7443	3.26188	2.93571		0.935853	0.202389	student's t-test	0.43531		1.019	0.220009	student's t-test	0.908806
	115	N-Acetyl-D-glucosamine 6-phosphate	N-Acetyl-glucosamine-6P	C8H16NO9P	301.056	C00357	HMDB01062	IC/MS	[M ‒ H]‒	9.02 ±0.01	1.45535e+06	1.76245e+06	1.04733e+06	1.09226e+06	1.20646e+06	680710	1.21096e+06	719481	1.33745e+06	1.07969e+06	901285	1.03719e+06		PIPES (IS)	IC/MS	[M ‒ H]‒	0.0128568	0.00873855	0.0062163	0.00853405	0.00883345	0.00503944	0.00598753	0.00511162	0.00579861	0.00526342	0.00427105	0.00515653		0.805667	0.567318	student's t-test	0.474832		0.869405	0.834577	student's t-test	0.148733
	116	Dihydroxyacetone phosphate	DHAP	C3H7O6P	169.998	C00111	HMDB01473	PFPP-LC/MS	[M ‒ H]‒	1.33 ±0.05	5.51192e+06	7.99373e+06	6.00554e+06	4.09147e+06	3.52993e+06	3.53317e+06	1.01679e+07	8.71373e+06	1.54042e+07	1.30219e+07	1.09082e+07	5.62735e+06		PIPES (IS)	PFPP-LC/MS	[M ‒ H]‒	0.117587	0.121682	0.0787627	0.0818707	0.0494019	0.0459879	0.177116	0.178752	0.20715	0.191882	0.153273	0.0945263		0.557367	0.822942	student's t-test	0.0580425		0.780936	0.212158	student's t-test	0.241597
	117	Lactic acid	Lac	C3H6O3	90.0317	C00186	HMDB00190	PFPP-LC/MS	[M ‒ H]‒	2.35 ±0.05	6.942e+08	1.2109e+09	9.30446e+08	6.21221e+08	7.18585e+08	5.55934e+08	1.54525e+09	8.28412e+08	1.52156e+09	2.34063e+09	2.06003e+09	1.47384e+09		PIPES (IS)	PFPP-LC/MS	[M ‒ H]‒	14.8096	18.4324	12.2028	12.4307	10.0567	7.23605	26.9169	16.9939	20.4614	34.4899	28.9459	24.757		0.654056	0.81721	student's t-test	0.0895005		1.37005	0.969007	student's t-test	0.121444
	118	Sebacic acid	Sebacic acid	C10H18O4	202.121	C08277	HMDB00792	PFPP-LC/MS	[M ‒ H]‒	16.03 ±0.03	1.38352e+06	3.20819e+06	2.93231e+06	1.72271e+06	2.95496e+06	2.31004e+06	2.98581e+06	2.3779e+06	2.8346e+06	2.81344e+06	3.16726e+06	4.94485e+06		PIPES (IS)	PFPP-LC/MS	[M ‒ H]‒	0.0295151	0.0488355	0.0384572	0.0344715	0.0413551	0.0300676	0.05201	0.04878	0.0381187	0.041457	0.0445038	0.0830618		0.906568	0.514306	student's t-test	0.604327		1.21679	0.178928	student's t-test	0.513915
	119	L-Threonic acid	Threonic acid	C4H8O5	136.037	－	HMDB00943	PFPP-LC/MS	[M ‒ H]‒	1.62 ±0.02	2.82065e+07	4.96668e+07	4.27229e+07	2.17094e+07	2.49815e+07	2.96273e+07	2.87393e+07	2.24162e+07	4.92684e+07	2.04266e+07	3.8917e+07	1.97586e+07		PIPES (IS)	PFPP-LC/MS	[M ‒ H]‒	0.601738	0.756034	0.560312	0.434408	0.349619	0.385629	0.500611	0.459843	0.662544	0.300993	0.546831	0.331898		0.609804	0.290917	student's t-test	0.0179518		0.726878	0.78129	student's t-test	0.209997
	120	2-Hydroxy glutaric acid	2-Hydroxy glutaric acid	C5H8O5	148.037	－	HMDB00606	PFPP-LC/MS	[M ‒ H]‒	2.61 ±0.03	1.91055e+07	3.94288e+07	4.71294e+07	2.2845e+07	2.34055e+07	2.94685e+07	2.04141e+07	1.10522e+07	2.58145e+07	2.09824e+07	2.84321e+07	2.06156e+07		PIPES (IS)	PFPP-LC/MS	[M ‒ H]‒	0.407583	0.600191	0.618103	0.45713	0.327564	0.383562	0.355594	0.226723	0.347144	0.309182	0.399505	0.346294		0.71854	0.473238	student's t-test	0.119102		1.13504	0.567979	student's t-test	0.442893
	121	DL-2-Hydroxybutyric acid	2-Hydroxybutyric acid	C4H8O3	104.047	C05984	HMDB00008	PFPP-LC/MS	[M ‒ H]‒	3.33 ±0.05	2.40509e+06	5.07813e+06	1.11985e+07	1.44652e+07	2.10426e+07	8.66219e+06	1.09697e+07	7.78632e+06	2.76643e+07	5.49715e+07	7.73128e+07	2.87208e+07		PIPES (IS)	PFPP-LC/MS	[M ‒ H]‒	0.0513084	0.0773	0.146869	0.28945	0.294494	0.112747	0.191082	0.159728	0.37202	0.810022	1.08634	0.482443		2.52903	0.371151	student's t-test	0.101306		3.29095	0.251268	student's t-test	0.0416685
	122	Oxidized glutathione	GSSG	C20H32N6O12S2	612.152	C00127	HMDB03337	PFPP-LC/MS	[M ‒ H]‒	5.92 ±0.04	2.94292e+07	4.00244e+07	5.90238e+07	3.69961e+07	3.30563e+07	3.53247e+07	5.21705e+07	2.08515e+07	3.28694e+07	2.25122e+07	2.81218e+07	2.3345e+07		PIPES (IS)	PFPP-LC/MS	[M ‒ H]‒	0.627822	0.609256	0.774099	0.740295	0.462628	0.459788	0.90876	0.427746	0.442017	0.331724	0.395145	0.392141		0.826735	0.477901	student's t-test	0.337289		0.62918	0.033609	Welch's t-test	0.297939
	123	Acetylcholine	Acetylcholine	C7H15NO2	145.11	C01996	HMDB00895	PFPP-LC/MS	[M ‒ H]‒	12.14 ±0.02	1.86856e+06	2.66853e+06	3.60131e+06	2.86837e+06	2.87055e+06	2.73844e+06	2.29377e+06	1.50891e+06	2.59186e+06	3.33626e+06	3.74014e+06	2.4689e+06		PIPES (IS)	PFPP-LC/MS	[M ‒ H]‒	0.0398625	0.0406206	0.0472312	0.0573963	0.0401737	0.0356437	0.0399553	0.0309536	0.0348544	0.0491609	0.0525535	0.0414717		1.04306	0.221789	student's t-test	0.807081		1.35383	0.774549	student's t-test	0.0407963
	124	Glycerophosphocholine	Glycerophosphocholine	C8H20NO6P	257.103	C00670	HMDB00086	PFPP-LC/MS	[M + H]+	1.63 ±0.02	2.77803e+08	2.62536e+08	1.54014e+08	1.35699e+08	116897	2.80417e+07	2.41908e+08	2.36232e+08	2.24473e+08	1.74925e+08	2.37519e+08	1.8799e+08		PIPES (IS)	PFPP-LC/MS	[M + H]+	4.25779	2.2485	1.3565	1.675	0.00121782	0.387295	2.26156	2.89727	1.93875	1.78836	2.04013	1.62973		0.26244	0.516122	student's t-test	0.124278		0.769026	0.305187	student's t-test	0.148551
	125	2-Aminobutanoic acid	2-Aminobutanoic acid	C4H9NO2	103.063	C02356	HMDB00452	PFPP-LC/MS	[M + H]+	2.09 ±0.02	1.45387e+06	1.90113e+06	3.07418e+06	2.35798e+06	3.49454e+06	5.06711e+06	1.60798e+06	1.697e+06	2.76535e+06	2.76322e+06	5.14429e+06	5.92814e+06		PIPES (IS)	PFPP-LC/MS	[M + H]+	0.022283	0.0162823	0.0270762	0.0291057	0.0364059	0.0699839	0.0150328	0.0208129	0.0238841	0.0282501	0.044186	0.0513927		2.06417	0.115939	student's t-test	0.147011		2.07315	0.251777	student's t-test	0.0431716
	126	Amino adipic acid	Amino adipic acid	C6H11NO4	161.069	C00956	HMDB00510	PFPP-LC/MS	[M + H]+	2.16 ±0.02	3.71777e+06	3.52989e+06	3.84684e+06	5.05053e+06	3.53742e+06	1.7299e+06	2.91167e+06	2.94496e+06	3.15948e+06	3.45189e+06	4.13653e+06	1.54742e+06		PIPES (IS)	PFPP-LC/MS	[M + H]+	0.056981	0.0302319	0.0338814	0.0623413	0.0368526	0.0238923	0.0272208	0.0361185	0.0272882	0.0352908	0.03553	0.013415		1.01645	0.709546	student's t-test	0.964598		0.929473	0.27942	student's t-test	0.800864
	127	Adenosine	Adenosine	C10H13N5O4	267.097	C00212	HMDB00050	PFPP-LC/MS	[M + H]+	9.76 ±0.08	1.85925e+08	1.49234e+08	3.1821e+08	1.04469e+08	2.18758e+08	1.66075e+08	1.25434e+08	7.19166e+07	1.2054e+08	1.70451e+08	2.09013e+08	9.71267e+07		PIPES (IS)	PFPP-LC/MS	[M + H]+	2.8496	1.27812	2.80266	1.28951	2.279	2.29373	1.17266	0.882023	1.04109	1.74262	1.79529	0.842017		0.845874	0.586038	student's t-test	0.593029		1.41481	0.137413	student's t-test	0.252697
[truncated: 61 more rows]

## Sheet: Supplementary Table S9
	Supplementary Table S9. Quantitaive metabolic profile data of 258 lipids during the 4-week pair-feeding
[truncated: 279 more rows]
